# Supplementary material for: Differential Gene Expression of Malaria Parasite in Response to Red Blood Cell-Specific Glycolytic Intermediate 2,3-Diphosphoglycerate (2,3-DPG)
Source: Preprints.org preprint supplement (doi:10.20944/preprints202311.0790.v1), 2023-11-13
Supplement: Supplementary file 1 [file ijms_Balau et al_Table S1.xlsx]

## Sheet: Table S1
GeneID	Base mean	log2(FC)	StdErr	Wald-Stats	P-value	P-adj
PF3D7_MIT04000	97.8052396323099	-1.90061449378922	0.366825540277985	-5.18124908191754	2.2040493454028e-07	0.000321460597026998
PF3D7_1001500	13.6497225842918	-2.6962727694747	0.515115828163568	-5.23430386343813	1.65607819265472e-07	0.000321460597026998
PF3D7_1370300	18.4327829961767	-2.32799513263098	0.463395245599403	-5.02377863117632	5.06646319969211e-07	0.000369471828837547
PF3D7_API05900	294.457511784001	-1.37661845776094	0.273637215692436	-5.03081590812649	4.88396929645744e-07	0.000369471828837547
PF3D7_API05700	292.891367647427	-1.37023905448317	0.278298430579138	-4.92363198610826	8.49525321873604e-07	0.000495613072781061
PF3D7_1038400	7.42285565108125	-2.70242684843777	0.573149149921587	-4.71504991119239	2.4165150620556e-06	0.00117482907266936
PF3D7_MIT03200	43.9049026730815	-2.02914287636561	0.441795223171339	-4.59294888206308	4.37026141192134e-06	0.00178027411870287
PF3D7_1302100	60.8466335399535	1.71028031768276	0.374259190608309	4.56977506658667	4.88247958506102e-06	0.00178027411870287
PF3D7_1035300	16.291188178999	-2.14022518970731	0.522128225259624	-4.09904135836192	4.14864904491067e-05	0.0134462325155605
PF3D7_1418800	68.5291954018151	-1.8459306988255	0.462906334468975	-3.98769807490984	6.67174957144509e-05	0.0194614934999053
PF3D7_0112300	887.148034975564	-1.38627800631905	0.358045391500966	-3.8717940217234	0.000108037233142362	0.0286495099160245
PF3D7_MIT02300	19.4771357990435	-1.74045567358199	0.454887049231337	-3.82612711556196	0.000130175088684995	0.0314550071746197
PF3D7_1148600	908.254489536742	-1.3684178558554	0.359368114399736	-3.80784438302523	0.00014018343958521	0.0314550071746197
PF3D7_1371000	880.292356340106	-1.32967268301929	0.359084198857007	-3.70295514882509	0.000213102568248503	0.0444014422557773
PF3D7_1239200	48.1050203608114	1.32126414016619	0.362144429807467	3.64844529258296	0.000263832067655262	0.0513065427566932
PF3D7_1325000	5.31191712658024	-2.0583171143532	0.588950344538656	-3.49489075512053	0.000474255828287322	0.0864627656946325
PF3D7_MIT01100	6.44560701367341	-1.9784494978716	0.572398161963877	-3.45642182197722	0.000547397967415749	0.0939270512324552
PF3D7_0730800	9.70901016706203	-1.92772677139571	0.561762112129309	-3.43157135337739	0.00060009524161967	0.0972487677669209
PF3D7_MIT01500	11.7001912588536	-1.92176707545048	0.563606740275557	-3.40976595579906	0.000650186495839458	0.0998207372822999
PF3D7_0725400	30.0172244197248	-1.67381610427359	0.496065669588348	-3.37418250624475	0.000740352648589958	0.107980433796845
PF3D7_0904300	4.90783004481613	-1.92739384438596	0.590747902188108	-3.26263341308022	0.00110382203258396	0.146356766774883
PF3D7_0905300	4.31173127738227	-1.92662787807753	0.590002319482477	-3.26545814221117	0.00109287156459801	0.146356766774883
PF3D7_0400400	11.0880737299337	-1.74460603678587	0.548543633589051	-3.18043256718	0.00147055359832397	0.186504558535262
PF3D7_1310700	27.0832212122836	-1.60948028402489	0.513418834513616	-3.13482906319482	0.00171954277493833	0.208996094770629
PF3D7_API06700	997.115290140539	-0.966875362889735	0.31083475738327	-3.11057672902887	0.00186722377743947	0.217867670351637
PF3D7_API04900	975.69244362989	-0.961959132434841	0.313133890537705	-3.07203774967632	0.00212602836488306	0.238524028475534
PF3D7_1353200	7.29795899579742	-1.69959070290276	0.566733805311069	-2.99892239879689	0.00270936304753011	0.246567007507938
PF3D7_1133600	7.73317741696086	1.77931778061237	0.590982628216431	3.0107784825796	0.00260578877115277	0.246567007507938
PF3D7_0706300	11.0109473144524	-1.54650902762766	0.515871459128468	-2.99785731554211	0.0027188493262175	0.246567007507938
PF3D7_0531800	859.911231995638	-1.0660430727002	0.357164245983887	-2.98474185108744	0.0028381773637054	0.246567007507938
PF3D7_MIT01400	38.4321081037264	-1.18997826454169	0.399199747180881	-2.98090936415973	0.00287393838027764	0.246567007507938
PF3D7_1017500	10.2901666419836	-1.61877458709999	0.536517592359674	-3.01718827146079	0.00255131299103288	0.246567007507938
PF3D7_0725800	854.985384598698	-1.077252454765	0.354639609433515	-3.03759767975651	0.0023847210252615	0.246567007507938
PF3D7_0104900	19.7496470364744	-1.52337566025432	0.499660020903728	-3.04882439363272	0.00229738729946166	0.246567007507938
PF3D7_0316800	23.8445352902785	-1.23406457263044	0.415699960148499	-2.96864250886528	0.00299118365862449	0.24929379234879
PF3D7_1300300	5.49059102374428	-1.72834482777524	0.584236615627031	-2.95829597383296	0.00309344946307665	0.25065533566096
PF3D7_0613800	46.7365505509518	1.16756035092798	0.397014108264547	2.94085355311855	0.00327309238276046	0.258043526500332
PF3D7_0618300	49.9066461814001	-1.00240955858427	0.349463256639044	-2.86842619228391	0.00412519434388307	0.304616700027265
PF3D7_API04400	6.57791474151585	-1.64628694257718	0.574488880714167	-2.86565501586493	0.00416147472949128	0.304616700027265
PF3D7_0818700	24.4144877700461	1.26887790035856	0.44297180324132	2.86446652151198	0.00417712307202284	0.304616700027265
PF3D7_0423300	10.8245995178884	-1.60572176544337	0.563608907621447	-2.84899997805192	0.00438568834946717	0.312025680863311
PF3D7_1016900	50.8307803136869	1.11064997542993	0.395083195289829	2.81117999619086	0.00493601638129981	0.314319572470455
PF3D7_MIT04200	5.74076243915895	-1.64741955688161	0.585315230312593	-2.81458515269078	0.00488402364733278	0.314319572470455
PF3D7_0632500	8.10461907549234	-1.61638393032119	0.575259533044322	-2.80983423563126	0.00495670220556768	0.314319572470455
PF3D7_1136300	12.5431416650063	1.42471921889753	0.506342871596443	2.81374400395042	0.00489682071709699	0.314319572470455
PF3D7_0936000	5.36612633164212	-1.66477456986291	0.588031722092853	-2.83109653325817	0.00463887181478782	0.314319572470455
PF3D7_0725600	33402.6579179399	-0.997089108108841	0.368107510261457	-2.70868993517855	0.00675494355821762	0.380445212419942
PF3D7_MIT02100	121.3254653219	-0.964608332870492	0.356290817297649	-2.70736231763349	0.00678201955633767	0.380445212419942
PF3D7_1139300	16.777505300035	1.42785385014041	0.527394080075758	2.7073755737556	0.00678174872395541	0.380445212419942
PF3D7_1004200	32.722295100192	1.24190117935628	0.456238433470301	2.72204419498367	0.00648794652302969	0.380445212419942
PF3D7_0631400	14.8401921119682	-1.41246440290993	0.518897242062854	-2.72205031827638	0.00648782630665173	0.380445212419942
PF3D7_0531600	33123.3305582127	-1.00640594315012	0.368968362471295	-2.72762124212863	0.0063792809496886	0.380445212419942
PF3D7_0311100	6.09255079248729	1.55360739347672	0.581889035679331	2.66993756234459	0.00758653528888481	0.417545725239188
PF3D7_1102800	101.237803185943	-1.24142654595505	0.470534519559731	-2.63833256509348	0.00833148316355835	0.427478727935577
PF3D7_1252400	7.69415390298554	-1.44739478281498	0.547736078869886	-2.64250400631142	0.00822954916954491	0.427478727935577
PF3D7_0601200	14.9923041632447	-1.34913211568298	0.511753020514857	-2.63629536436476	0.00838167383369778	0.427478727935577
PF3D7_1006200	138.592574881225	-0.774731978957303	0.295053755835145	-2.62573162901938	0.00864629583414435	0.427478727935577
PF3D7_1204900	8.22753428278558	-1.48461500693947	0.561154524310819	-2.64564383359967	0.00815356152655035	0.427478727935577
PF3D7_1372200	8.32371582727991	-1.40619969115203	0.535081760894261	-2.62800901455117	0.00858862396915276	0.427478727935577
PF3D7_1401400	36.3859548745917	-0.998294125833316	0.385932963194331	-2.58670344603511	0.00968989482930395	0.471090386951327
PF3D7_API00100	6.65648672335039	-1.45680940478994	0.565919537044796	-2.57423416126844	0.0100462255764706	0.480407213222372
PF3D7_0726400	25.5260377929888	1.10134386814034	0.436343957891173	2.52402685593053	0.0116019064977851	0.485624699322607
PF3D7_0817300	30.1266443198076	1.1010159613613	0.436484693193528	2.522461791972	0.0116536609367784	0.485624699322607
PF3D7_0936800	6.33521167934347	-1.46358221574198	0.578042765572828	-2.53196182516289	0.0113426339406744	0.485624699322607
PF3D7_1366900	18.2958110279716	1.15956436985598	0.456468459220878	2.54029461714656	0.011075912442322	0.485624699322607
PF3D7_0422400	44.9315172987301	-1.04147391645453	0.406134159937055	-2.56435931569003	0.0103366474180367	0.485624699322607
PF3D7_1371200	86.4021833197143	-1.01818369611075	0.403318530893725	-2.52451503741852	0.0115858048110459	0.485624699322607
PF3D7_0918500	345.245131078502	-0.848833696349187	0.33353358330298	-2.54497219723182	0.0109286439370312	0.485624699322607
PF3D7_0818200	215.874337647153	-0.671899595726855	0.262575303608303	-2.55888343836465	0.010500894409535	0.485624699322607
PF3D7_0425800	10.7445808965638	-1.45482879611575	0.575339537547846	-2.52864387230604	0.0114504145897423	0.485624699322607
PF3D7_1148620	86.7671476747463	-1.01295660162239	0.40377646333147	-2.50870640964238	0.0121174150285615	0.490923606087695
PF3D7_0902800	23.9344193598716	1.07877889976166	0.429933422666065	2.50917663733149	0.0121012954928555	0.490923606087695
PF3D7_1303600	6.05264756094486	-1.44735661796978	0.57818557484743	-2.5032734833478	0.0123050419470899	0.491695991228235
PF3D7_1426000	87.3008906290389	-0.792301852386263	0.31825006431901	-2.48955755619917	0.0127902207250599	0.504176673716214
PF3D7_0701600	7.73532254850137	-1.37368101861607	0.554829633645175	-2.4758609405758	0.0132915336218247	0.516952047664834
PF3D7_1319400	19.5781699187727	1.13285788390087	0.465568566840284	2.43327828506409	0.0149627960080296	0.574295736255557
PF3D7_1335600	7.94310948648132	1.41490097394384	0.585423492691336	2.41688451455747	0.01565398279484	0.583605686008629
PF3D7_0112500	8.89325274882626	-1.35528894928113	0.562643775107543	-2.40878689011015	0.0160056410286905	0.583605686008629
PF3D7_0404000	6.00731381116873	-1.38087617151299	0.572507017089357	-2.41198121646335	0.015866098900388	0.583605686008629
PF3D7_1316500	5.35519706745426	1.41157833317606	0.584707631100469	2.41416095514156	0.0157714935676609	0.583605686008629
PF3D7_0906500	12.1990786789505	-1.24493888100711	0.518870628897538	-2.39932424707152	0.0164253627420973	0.591515840971578
PF3D7_1028000	7.85377720490547	-1.36244193470542	0.571537259988086	-2.38381997130655	0.0171339820653141	0.594997924815731
PF3D7_1035900	19.0802823671696	-1.21514466686302	0.508552748469033	-2.38941716571415	0.0168751287803208	0.594997924815731
PF3D7_1033900	24.0097903942072	1.02641046308264	0.430405397803111	2.38475276639576	0.0170906027108699	0.594997924815731
PF3D7_0709050	40.8370016323848	-0.974874232499994	0.41152183776708	-2.36894896705766	0.0178387146847054	0.612182714532771
PF3D7_0936300	8.2478099494164	-1.31227924110857	0.55626986253846	-2.35906945438346	0.0183208264662221	0.621416869790349
PF3D7_0216500	7.28901145088888	-1.31899612065462	0.56199043386173	-2.34700813604799	0.0189248415312712	0.634526008582965
PF3D7_0818100	10.9457879621844	-1.29048933899826	0.551384491640303	-2.34045273046982	0.0192603763685477	0.638437703034702
PF3D7_1252800	20.712155418762	1.02847162834342	0.442555372405387	2.32393886160155	0.0201287710522293	0.659726125385988
PF3D7_0322900	41.4418338724847	-0.815811053363407	0.357590873548388	-2.28140904511371	0.0225242533036134	0.690109482207575
PF3D7_0208600	5.69939257887152	1.30951764923486	0.577457562800849	2.26772967156806	0.0233456882143528	0.690109482207575
PF3D7_1239500	11.0457858016871	1.31135855657262	0.580551055899953	2.25881693478241	0.023894774666769	0.690109482207575
PF3D7_0821000	20.5356623093389	1.01039534373085	0.443531261355371	2.2780701875291	0.022722396151544	0.690109482207575
PF3D7_0301700	38.2149882627628	0.89663902460418	0.39434299056382	2.2737541836922	0.0229807703636562	0.690109482207575
PF3D7_1460700	41.2027651772783	-0.859946939661227	0.374867269541638	-2.29400379689779	0.0217902806467915	0.690109482207575
PF3D7_0114100	11.1829337318345	-1.21205334378213	0.536404819402006	-2.25958697599576	0.0238468966696575	0.690109482207575
PF3D7_0202500	39.5675456512601	-1.17212977884628	0.517722821886752	-2.26401025663628	0.0235734839524223	0.690109482207575
PF3D7_1332200	14.5826296603928	-1.18259180297254	0.518322505718045	-2.28157525464627	0.022514429045214	0.690109482207575
PF3D7_1402500	86.9220539065938	-0.761391279064831	0.33138425107283	-2.2976085212254	0.0215840802332853	0.690109482207575
PF3D7_1433100	6.88787777678845	1.31065677865501	0.578966910583134	2.26378529532011	0.0235873233655508	0.690109482207575
PF3D7_1306000	4.56847618772805	-1.35051849009626	0.591475186344367	-2.28330540532594	0.0224123848481286	0.690109482207575
PF3D7_1012400	488.540038059388	-0.55466750994124	0.246314627444655	-2.25186589889336	0.0243307477027659	0.695811676950669
PF3D7_1314200	6.20904375476717	1.30109132795169	0.581537214452764	2.23733115545501	0.0252647044055272	0.70187755000879
PF3D7_1035500	23.8270425056031	-1.17812405518674	0.526032617168314	-2.23964069286939	0.025114258670831	0.70187755000879
PF3D7_1122600	4.76079554153111	-1.30949047574293	0.584592374635399	-2.2400060838283	0.0250905279092187	0.70187755000879
PF3D7_0525000	37.34781237219	0.831798665498616	0.373867423116794	2.22484927561813	0.0260913581779311	0.718004639670046
PF3D7_1033200	53.8276125986974	0.778880637992086	0.352715698354324	2.20823921823194	0.0272276018626658	0.735949960137591
PF3D7_0935900	12.037053230141	-1.15648825839292	0.52378474749373	-2.2079456569261	0.0272480616026259	0.735949960137591
PF3D7_0930200	21.1341627050848	-0.977159487100732	0.443648497039287	-2.2025533583949	0.0276262443921029	0.739318852218021
PF3D7_0307900	7.30949433540672	-1.2342338560143	0.564495121554839	-2.18643848084061	0.0287835408918371	0.763287170740807
PF3D7_1455900	5.2568194963012	1.27575947104	0.586298173648647	2.17595675439462	0.029558494375685	0.775809189052539
PF3D7_1015200	4.45610684598815	1.2829596146285	0.590435931143706	2.17290233699589	0.0297876685546398	0.775809189052539
PF3D7_1200400	6.16050230728527	-1.21239155157827	0.561971070019855	-2.15739139656324	0.0309751810124722	0.78569220011636
PF3D7_1101700	9.65967482831091	-1.17794396781949	0.545632661523027	-2.15885897396885	0.0308611095501089	0.78569220011636
PF3D7_0208400	24.7542951264163	0.935180573460765	0.432924395095217	2.16014755475972	0.0307612486263034	0.78569220011636
PF3D7_0403600	13.0043289564717	1.10710041731556	0.514930047185466	2.15000158442262	0.0315550894544338	0.791695291996879
PF3D7_0324100	10.3422053936358	-1.15202765249539	0.536454253785451	-2.1474853528818	0.0317546620375848	0.791695291996879
PF3D7_0503200	4.59382966074823	1.26156247478304	0.58863978978776	2.1431824634857	0.0320984498581107	0.791839095316819
PF3D7_1305300	14.4981676075655	1.04247940993283	0.4872399478902	2.13956063013075	0.0323902911648852	0.791839095316819
PF3D7_1147300	21.6819807611976	0.954919574112648	0.446790893182723	2.137285223766	0.0325747999444698	0.791839095316819
PF3D7_0617600	9.2897754261354	-1.19643950923897	0.564383463837617	-2.11990532306455	0.034014030412168	0.819991129853671
PF3D7_1039000	6.84608779189059	-1.17648395566164	0.556161969955281	-2.11536210531661	0.0343990969578698	0.822476769066444
PF3D7_1474500	14.2162151581934	1.04408172005491	0.495864037628655	2.1055806447428	0.0352407953950751	0.835751220873448
PF3D7_1006100	30.8894252153075	-0.804157420773401	0.38432713881386	-2.09237740341537	0.0364047685280442	0.841165028835817
PF3D7_1338700	16.1594226640859	0.965989374875182	0.465758852931362	2.07401183852009	0.0380782114022874	0.841165028835817
PF3D7_0629700	71.1187754377615	0.727598478493449	0.348463475568247	2.08801934638038	0.0367960895663849	0.841165028835817
PF3D7_1144000	28.0297310028996	-0.829422047012548	0.395253832644739	-2.09845415403738	0.0358650457593046	0.841165028835817
PF3D7_1366300	23.7763564624442	0.994845401557595	0.475226597869239	2.09341271304712	0.0363123285305771	0.841165028835817
PF3D7_1431700	50.6258919667805	-0.702993297943444	0.338879789211065	-2.07446215538572	0.0380364099703294	0.841165028835817
PF3D7_1117800	6.7527021548718	1.2031202404391	0.57910965698729	2.07753441152771	0.0377522626086019	0.841165028835817
PF3D7_0404300	10.9242004208722	1.06758934440962	0.513076735248433	2.08075960390738	0.0374559153825747	0.841165028835817
PF3D7_1362800	7.02049066199198	-1.18926603302781	0.573823746383261	-2.07252843843359	0.038216186953432	0.841165028835817
PF3D7_1011200	7.0963709415636	-1.17659268937969	0.568110035742439	-2.07106478561332	0.0383527421443825	0.841165028835817
PF3D7_0417400	46.3694262364767	0.802021718197249	0.388373272564267	2.06507958928748	0.0389154703061074	0.847137514051607
PF3D7_0215800	9.33002687444609	1.2075885616811	0.588237437159909	2.05289307581561	0.0400829487195999	0.85134503967124
PF3D7_0312800	63.6904749557776	-0.700375431078241	0.34045763935518	-2.05715880661318	0.0396709525408563	0.85134503967124
PF3D7_1117100	17.8765853382059	1.10463220602628	0.538402377559243	2.05168523035493	0.0402002630478966	0.85134503967124
PF3D7_0613300	10.984742128996	-1.05159324496541	0.512745905511369	-2.0509052020935	0.0402761794565071	0.85134503967124
PF3D7_1002700	6.42841283839306	1.17974278215042	0.581516799304676	2.0287337933505	0.0424854119311171	0.853169226434345
PF3D7_1105000	2120.12707108713	-0.552655577294743	0.271389116733753	-2.03639550452912	0.0417106564979604	0.853169226434345
PF3D7_1327300	17.3042185620867	-1.03671043377455	0.511778443376364	-2.02570164334207	0.0427953682003112	0.853169226434345
PF3D7_1103800	21.8997859634918	0.930508866513862	0.459180204605453	2.0264568402146	0.0427179912723549	0.853169226434345
PF3D7_1349300	6.19852631342977	1.18178810533199	0.583210422645681	2.02634942628582	0.0427289896050043	0.853169226434345
PF3D7_0217800	32.6592957155406	-0.825249080740047	0.406483817843048	-2.03021385972785	0.0423348056320405	0.853169226434345
PF3D7_1128000	15.6070864525829	0.97695655763907	0.478297079913311	2.04257269941129	0.0410947559426051	0.853169226434345
PF3D7_0108500	4.35121856681583	-1.19271382412272	0.58935526726533	-2.02376035367773	0.0429948153191117	0.853169226434345
PF3D7_0218800	547.967387819626	-0.885781416482266	0.433029604730842	-2.04554470827194	0.0408011862067634	0.853169226434345
PF3D7_1468200	13.7776896144397	0.988826013349182	0.489542865438462	2.01989668966687	0.0433941047402746	0.855274348157981
PF3D7_0402100	6.70603799734715	-1.16532248416663	0.581642664630014	-2.00350241657031	0.0451233884724603	0.883388752846755
PF3D7_1331200	10.2945328024595	1.05315311217311	0.529694274438068	1.98822823465546	0.0467864536567828	0.903976907182938
PF3D7_0302000	5.09126563412998	1.15628269216068	0.581586522916519	1.98815248737573	0.046794827900111	0.903976907182938
PF3D7_0401800	7.83777352696348	-1.07120182348958	0.539897962017831	-1.98408199113411	0.0472467003881512	0.906701480475243
PF3D7_0423700	202.160721282823	0.621583923552171	0.314163948217626	1.97853358756998	0.0478685433830947	0.912630987245014
PF3D7_1404800	14.5419832375447	-1.00597506858189	0.509244004685278	-1.97542839842287	0.0482195527122739	0.913353475725344
PF3D7_1007900	8.05347635803642	1.08164388241267	0.548709184959425	1.97125164305871	0.0486950995255221	0.916410356877084
PF3D7_0222100	11.7450682631536	-1.06305794757084	0.54093090846669	-1.9652379461624	0.0493867039525085	0.92346804762479
PF3D7_0702500	25.4109908683266	-0.824663203828433	0.427108296790445	-1.93080586358415	0.0535070649682509	0.925946029633172
PF3D7_1465200	4.28078195815587	1.14377430868074	0.591417402189851	1.93395443631801	0.053118730195678	0.925946029633172
PF3D7_1216300	10.9924056590011	0.999502261818252	0.514682976593735	1.941976531715	0.0521399414180292	0.925946029633172
PF3D7_0711400	4.8378770806569	1.12880363093376	0.584956140821976	1.9297235333705	0.0536411024504011	0.925946029633172
PF3D7_1304100	17.8434370359226	-0.860286600072483	0.443579681429349	-1.93941840911283	0.0524504107031281	0.925946029633172
PF3D7_0412700	12.6323982202083	-1.07520565183495	0.550196020856432	-1.95422287889558	0.0506748647333304	0.925946029633172
PF3D7_0218300	4.44504667218945	1.14474696229965	0.58895832552637	1.94368075411203	0.0519339608923417	0.925946029633172
PF3D7_1365900	54.9248350522792	-0.655318124981505	0.339483471072488	-1.93033882595591	0.053564869299719	0.925946029633172
PF3D7_0803500	11.247793366507	-1.04832704453356	0.544373422154352	-1.92574986556988	0.0541356141793305	0.925946029633172
PF3D7_0504800	28.6100095181389	0.855898819288461	0.444001392711701	1.92769399677134	0.0538931992486103	0.925946029633172
PF3D7_0706000	20.7120205191818	0.889212833779269	0.454680290376916	1.95568810128572	0.050501907263052	0.925946029633172
PF3D7_1010700	10.3227611341616	-0.990251899085332	0.514526196760262	-1.92458985629983	0.0542806894299871	0.925946029633172
PF3D7_1341300	45.2378759669847	-0.68286182197375	0.354635271675469	-1.92553272760372	0.054162745651572	0.925946029633172
PF3D7_1027400	8.80739935897705	-1.0369800627585	0.529218456284327	-1.95945559049319	0.0500594558655588	0.925946029633172
PF3D7_1035200	209.488170451298	-0.811000146583961	0.420650750714712	-1.92796552771158	0.0538594141122595	0.925946029633172
PF3D7_0525800	32.5699782727972	-0.99519913347778	0.521233774393379	-1.90931436596949	0.0562215501761915	0.952743999280016
PF3D7_0521300	9.4141474596238	1.02397023467015	0.540579639889771	1.89420791889044	0.0581974174302961	0.952743999280016
PF3D7_1357100	48.6352891540547	-0.687469527567278	0.363721735639923	-1.89009745694125	0.058744927177261	0.952743999280016
PF3D7_1316900	24.61070060411	0.785303070486615	0.412600788499209	1.90329997512382	0.0570014141046964	0.952743999280016
PF3D7_1207200	9.25429016445491	1.03448433735705	0.543136963685618	1.90464727411893	0.0568259370683732	0.952743999280016
PF3D7_1246800	7.39304583380723	-1.04984807922757	0.552596160372982	-1.8998468583621	0.0574532195827096	0.952743999280016
PF3D7_1422500	9.73087605635275	1.01435366519941	0.536765622047484	1.88975154804098	0.058791196390265	0.952743999280016
PF3D7_1323100	52.9328381415188	-0.624814950182977	0.329848691528643	-1.89424716917126	0.058192209834696	0.952743999280016
PF3D7_1113400	12.7123588738279	-0.945493285379509	0.500018593716925	-1.89091625243597	0.0586355245410258	0.952743999280016
PF3D7_1136400	18.8937462106824	0.932250942453076	0.494148405526426	1.88658089761502	0.0592167180737999	0.954337937134112
PF3D7_0610000	4.7354314619818	-1.10054180395592	0.591433634650611	-1.86080354494221	0.0627719247179822	0.963714233696601
PF3D7_0424600	9.78914225147748	-0.97549228713506	0.52177190678828	-1.86957610105844	0.0615427066089214	0.963714233696601
PF3D7_0935390	13.2173448114489	0.970046469588165	0.520338646281905	1.86425989405104	0.0622852160076537	0.963714233696601
PF3D7_1311500	12.4638951570087	-0.95925950784716	0.513008348769343	-1.86987114371205	0.0615017138524881	0.963714233696601
PF3D7_1149200	10.7029210095047	-1.0515130542019	0.564762367990394	-1.86186813038469	0.0626216802190582	0.963714233696601
PF3D7_0628300	68.8425032526903	-0.676608261601056	0.360277446668984	-1.87802003110872	0.0603784248776577	0.963714233696601
PF3D7_1456500	13.9996332407297	0.91976337067402	0.492774744284203	1.86649860071472	0.0619716396508782	0.963714233696601
PF3D7_1308400	46.120993406208	0.69478469879565	0.372191781037299	1.86673842409761	0.0619381251212294	0.963714233696601
PF3D7_0320800	14.3636315942528	0.926066840791966	0.493344474352868	1.87712012383783	0.0605016318644318	0.963714233696601
PF3D7_1017000	4.44941824920634	1.09594545534002	0.590255384986474	1.85673097309419	0.0633494385911555	0.967488546441888
PF3D7_0412000	6.05788703138277	1.03418916489436	0.569353423282012	1.81642741152379	0.0693048334929248	0.97453786029449
PF3D7_0207000	40.148208504794	-0.672188921658363	0.366145934160017	-1.83584974991036	0.0663798812517005	0.97453786029449
PF3D7_0516200	43.2578157081614	-0.711890467926447	0.386175231059422	-1.84343896415487	0.0652649455350549	0.97453786029449
PF3D7_1203700	46.1120203877584	0.662500454545213	0.365252894327344	1.81381301786886	0.0697065176422728	0.97453786029449
PF3D7_0524900	7.23292969418893	-1.02271352570004	0.565625154953523	-1.80811181529591	0.0705890996461942	0.97453786029449
PF3D7_1134700	4.31187523451573	-1.04520074967435	0.585156157611854	-1.78619114928233	0.074068313655625	0.97453786029449
PF3D7_0509100	22.8360199100065	0.811835406869383	0.448117516860295	1.81165738076354	0.070039152790353	0.97453786029449
PF3D7_0817700	25.5832218553099	-0.802034143621657	0.445805229878361	-1.79906849419531	0.0720078466445074	0.97453786029449
PF3D7_0507000	15.6507306956293	-0.832147357621716	0.456975410782091	-1.82098935301034	0.0686084753263815	0.97453786029449
PF3D7_0912500	10.0960303301626	0.940484112796575	0.527874335195956	1.78164394457149	0.0748073134142519	0.97453786029449
PF3D7_0721000	29.1086282694123	0.818291913435572	0.442295080599207	1.85010403535797	0.0642985564441345	0.97453786029449
PF3D7_0607600	6.34740142891843	1.04783234484867	0.578751236002814	1.81050558455062	0.0702174191139488	0.97453786029449
PF3D7_1448300	23.6800889668044	0.771738262322483	0.423521342983366	1.82219450119375	0.0684254786436821	0.97453786029449
PF3D7_1105400	76.5417149605977	-0.548193781700991	0.305595581612701	-1.79385375537186	0.072836514293597	0.97453786029449
PF3D7_1230400	9.23398566667507	0.985193842756055	0.54592678828186	1.80462630503379	0.0711331789042836	0.97453786029449
PF3D7_0322000	22.2132849640835	-0.787784344000301	0.440632369529131	-1.78784946017957	0.0738002986566001	0.97453786029449
PF3D7_1137000	5.28165117440431	-1.08129824867117	0.591238201408643	-1.82887074295088	0.0674189740599476	0.97453786029449
PF3D7_0806200	4.70884946818571	-1.0611670485833	0.583904607246977	-1.81736371902689	0.069161439227784	0.97453786029449
PF3D7_1148500	27.6399068619224	0.774462698203072	0.434867018358897	1.78091845439496	0.0749257733574266	0.97453786029449
PF3D7_1309120	186.998294614853	-0.78861587895659	0.436106628922211	-1.80830977255624	0.070558301741326	0.97453786029449
PF3D7_1147900	13.885764152348	-0.877448124109895	0.477112224820254	-1.83908120241619	0.0659032433910498	0.97453786029449
PF3D7_1139100	9.5657525162568	0.968015622714186	0.54358984592757	1.78078312162433	0.0749478877931948	0.97453786029449
PF3D7_0723300	5.22995345580333	-1.04993464401677	0.582351554354849	-1.80292236908327	0.07140040740743	0.97453786029449
PF3D7_1206800	6.08602476466257	1.06425792134611	0.585294481169412	1.81832898752049	0.0690138648434658	0.97453786029449
PF3D7_1459200	7.81614695581532	1.01968994622547	0.573044501902922	1.77942540734508	0.0751700440748235	0.97453786029449
PF3D7_0414600	7.50721406445283	-0.997486707658258	0.549753620346166	-1.81442499101719	0.0696123211250972	0.97453786029449
PF3D7_1320600	26.3628470697869	-0.792113681851078	0.443383288790902	-1.78652128277355	0.0740148943887629	0.97453786029449
PF3D7_0928300	9.29029916515872	-0.974817476408418	0.544477295637513	-1.79037304993045	0.0733939598294958	0.97453786029449
PF3D7_1335800	5.79578374918005	1.06938122161789	0.5818300584897	1.83796145629492	0.0660680851032743	0.97453786029449
PF3D7_0219400	28.9508751123278	-0.751053729559785	0.411060241990055	-1.82711352945186	0.0676827014398742	0.97453786029449
PF3D7_0113200	9.98888188193037	-0.933469953613182	0.520450861052782	-1.79357942020681	0.0728803237478496	0.97453786029449
PF3D7_1136600	5.4218925518775	1.0464099772287	0.585934320220914	1.78588271947303	0.0741182494958283	0.97453786029449
PF3D7_1411000	10.4116483929175	-1.01182062062534	0.556119470060469	-1.81943031146765	0.0688458057780076	0.97453786029449
PF3D7_1440900	4.63655429290275	-1.06132666896081	0.583994636124243	-1.81735687848855	0.0691624859628426	0.97453786029449
PF3D7_1227900	5.16736460796266	1.02892702054474	0.579320798161168	1.77609197496564	0.0757177587372389	0.974893790114969
PF3D7_0702200	4.34465412943801	-1.04239548881977	0.589206374984943	-1.76915174898848	0.076868553900049	0.974893790114969
PF3D7_1328700	8.14484769210395	-1.04798178985746	0.591260701174688	-1.77245297679243	0.0763193944409762	0.974893790114969
PF3D7_0522000	6.61223524202223	0.997552253232802	0.563375500120312	1.77067027767407	0.0766155478175971	0.974893790114969
PF3D7_1014000	4.28872362265581	-1.04098665829109	0.586827307832098	-1.77392334064476	0.0760758313802859	0.974893790114969
PF3D7_0719600	33.1813682480596	-0.705348897899205	0.399390498604129	-1.76606328984891	0.0773852314087069	0.97719792216103
PF3D7_0101300	4.31022286936058	-1.0256581205647	0.588292871592973	-1.74344815327684	0.0812553632490652	0.994671962314683
PF3D7_1017600	12.913419707938	0.871421466611072	0.50421568967373	1.72827122292635	0.0839396098019734	0.994671962314683
PF3D7_1352500	47.5457850261107	-0.633771089377876	0.367045740231294	-1.72668150018171	0.0842248799080311	0.994671962314683
PF3D7_1350100	13.5661302016362	0.872366137921767	0.498241735428834	1.75088932919465	0.079964975224226	0.994671962314683
PF3D7_1311600	7.50649851839032	0.962184509615226	0.551107760125254	1.74590992766377	0.0808266045229365	0.994671962314683
PF3D7_0625700	5.80756761088924	-0.999927233553945	0.57511423772518	-1.73865845768152	0.0820948573260566	0.994671962314683
PF3D7_0905500	14.2328459433257	-0.86893661384756	0.501294676555213	-1.73338488215894	0.0830272828119215	0.994671962314683
PF3D7_1248900	18.2391371941054	-0.770138351556172	0.444929378508902	-1.73092267841955	0.0834655561828807	0.994671962314683
PF3D7_0704500	11.7981102204028	0.927527501591552	0.534164583767508	1.73640770986654	0.0824917699902756	0.994671962314683
PF3D7_1106500	4.20649606279427	1.02992062341843	0.591082700043643	1.74243066721863	0.0814331136024147	0.994671962314683
PF3D7_1113000	10.898801497074	-0.938661022794964	0.541445699104602	-1.73361987055626	0.0829855524258014	0.994671962314683
PF3D7_0403400	16.1107428676346	0.834412239540438	0.483003520197	1.72754898183788	0.0840691162964481	0.994671962314683
PF3D7_0507700	7.24675108459068	0.994085000072254	0.571959606553569	1.73803357559158	0.0822048977973873	0.994671962314683
PF3D7_1134300	11.9219677156429	0.899354785651373	0.51821921050094	1.73547172205755	0.0826572859831667	0.994671962314683
PF3D7_1031600	15.9219802945214	-0.825487788522079	0.473833243220869	-1.74214831975665	0.0814824943568393	0.994671962314683
PF3D7_1437900	18.9460019740695	0.793733476773391	0.455421471547003	1.74285475403079	0.0813589891823084	0.994671962314683
PF3D7_1351400	32.2593622833531	-0.649164469071929	0.376404088225457	-1.72464776387629	0.08459097009003	0.994967176421844
PF3D7_0507200	10.3315507719489	0.237365451280447	0.539946495372811	0.439609208161553	0.660220170362333	0.995517635545774
PF3D7_0806000	4.48252204337431	-0.5539165372648	0.58873871396829	-0.940852918489465	0.346780237845986	0.995517635545774
PF3D7_1227500	20.4460417306968	0.461425440134946	0.445244770346958	1.03634106645515	0.300043053912982	0.995517635545774
PF3D7_0920900	7.59546198236195	-0.275710228464132	0.559506046263106	-0.492774350349881	0.622172036215846	0.995517635545774
PF3D7_1443600	7.5896046220651	0.425170504027971	0.550089184081743	0.772911950155325	0.439574491910402	0.995517635545774
PF3D7_0214100	12.1150105419126	-0.213100821368385	0.494974124284263	-0.430529215393897	0.666810719334883	0.995517635545774
PF3D7_0621100	6.37380623630752	-0.629408775598044	0.560590570534667	-1.12276019020038	0.261539357056776	0.995517635545774
PF3D7_1342400	27.0885483961926	-0.263376660527315	0.415686837944865	-0.633593937757173	0.526345858148595	0.995517635545774
PF3D7_1448500	23.4849430111583	0.622346421835313	0.432666316375986	1.43839813334232	0.150321121975516	0.995517635545774
PF3D7_1125000	7.07678037168862	0.439359247355882	0.582700640747848	0.754005087058084	0.450846167145282	0.995517635545774
PF3D7_0722200	16.7780643489916	-0.35308672517731	0.524211714785512	-0.673557486829115	0.500592689151907	0.995517635545774
PF3D7_0519700	28.1261219358585	0.316726025869862	0.411184327203441	0.770277476342515	0.441135314214041	0.995517635545774
PF3D7_0508700	10.1905488799271	0.699598588944422	0.535620885894616	1.30614508763213	0.191503222569066	0.995517635545774
PF3D7_1126200	37.505076595853	-0.271921684722143	0.39687086622422	-0.685164137416212	0.493240351366825	0.995517635545774
PF3D7_0806700	14.0626872810256	0.351552449461851	0.484776040624414	0.725185281452925	0.468338371166664	0.995517635545774
PF3D7_0911100	6.52475931394759	-0.253892045029302	0.577074184560511	-0.43996430930741	0.659962957213682	0.995517635545774
PF3D7_0303500	12.6582227212734	0.50724819008647	0.543200135469373	0.933814550042708	0.350399562760166	0.995517635545774
PF3D7_1026000	19.3463456801316	0.459476229291376	0.504814996637892	0.910187360422184	0.362723708801305	0.995517635545774
PF3D7_0919800	8.93556625821268	0.625310141231453	0.544544285876176	1.14831824968161	0.250837207963534	0.995517635545774
PF3D7_0410900	9.84099583356459	-0.525403992743271	0.536689046894913	-0.978972825667054	0.327593406596886	0.995517635545774
PF3D7_0519600	6.77001619201237	-0.433964875362203	0.55277031369023	-0.785072686818336	0.43241095268466	0.995517635545774
PF3D7_1460600	22.9820535424908	-0.238409697215515	0.459745060897916	-0.518569349608419	0.604061087651245	0.995517635545774
PF3D7_1321700	15.0447440919297	0.604234038183671	0.490702268113241	1.23136589628363	0.218186046109624	0.995517635545774
PF3D7_0820000	15.1579462303733	0.545197721976436	0.523591392085031	1.04126563235764	0.297752282420662	0.995517635545774
PF3D7_1307100	5.31833910030487	0.45692018759852	0.580238200364529	0.787470020607854	0.431006771376844	0.995517635545774
PF3D7_1110300	4.40957578066999	-0.266927205253535	0.584757415593707	-0.456475109396471	0.648048365606516	0.995517635545774
PF3D7_1327000	6.30848261921938	-0.366530774329246	0.565692756181417	-0.647932592956344	0.517028549009688	0.995517635545774
PF3D7_0716300	59.1280653075804	0.206368297871068	0.349970692975734	0.589673084098437	0.555409843692128	0.995517635545774
PF3D7_1463300	4.78229161013541	-0.454500753194342	0.57679692872121	-0.787973601388611	0.430712147380317	0.995517635545774
PF3D7_1321100	13.8174134998911	-0.620554369083844	0.531497814333995	-1.16755770644409	0.242985218510687	0.995517635545774
PF3D7_1335300	39.4274130490541	-0.314065016117258	0.525961381314004	-0.597125620388007	0.550423513691091	0.995517635545774
PF3D7_1433400	77.9040149975318	0.38259103046684	0.323620102234315	1.18222269823593	0.237117348518511	0.995517635545774
PF3D7_1006900	8.44259708707866	-0.378982112713971	0.543918994957777	-0.69676204770784	0.485951720960027	0.995517635545774
PF3D7_1026600	19.2486647666246	-0.719016434334873	0.542227124411756	-1.32604291073581	0.184825484278773	0.995517635545774
PF3D7_0922100	19.2206804646732	-0.237360382919464	0.4512817088012	-0.525969429494486	0.598909447572095	0.995517635545774
PF3D7_1125200	6.09542701989869	-0.490043580270876	0.568596218573524	-0.861848116929587	0.388771102747098	0.995517635545774
PF3D7_1209900	5.14176614112219	0.302023931717785	0.582559644460486	0.518442934710131	0.604149265314345	0.995517635545774
PF3D7_0918100	14.193092527552	-0.762873939969748	0.485251233322237	-1.57212158894845	0.115922355582051	0.995517635545774
PF3D7_1019400	28.0975373309653	-0.724074706750476	0.447078385879191	-1.61956992245681	0.105324694978753	0.995517635545774
PF3D7_1211200	6.86505558704953	0.63974375028793	0.556611280220983	1.14935462686624	0.2504097813903	0.995517635545774
PF3D7_1222300	72.1083312664794	0.392863112104266	0.317269167495349	1.23826438984187	0.215618043166225	0.995517635545774
PF3D7_1221300	7.89308033117235	-0.320904480850064	0.54139518851261	-0.59273611524272	0.553357767721321	0.995517635545774
PF3D7_0616800	7.67726962229725	0.724926554464954	0.54587439959545	1.32800980409083	0.184174868092165	0.995517635545774
PF3D7_1429700	5.64191420425306	0.407525907178095	0.576757180942176	0.706581418739114	0.47982663942743	0.995517635545774
PF3D7_0415300	5.68944364140237	0.387684362316441	0.570569338425157	0.679469323371807	0.496840538439756	0.995517635545774
PF3D7_0806800	32.1562023395486	-0.264792530442327	0.378444277019752	-0.699686972485271	0.484122814007579	0.995517635545774
PF3D7_1119300	8.76880914429266	0.303278346466718	0.53955676440281	0.562087933050735	0.574056109454823	0.995517635545774
PF3D7_0105800	9.05214662234343	0.539857804649033	0.555332592628594	0.97213419816346	0.330983790904584	0.995517635545774
PF3D7_0526600	18.1504795984708	-0.60208628708049	0.458683571306867	-1.31263974719008	0.189304369516978	0.995517635545774
PF3D7_1441000	12.0042525561882	-0.327452381730593	0.511414110680309	-0.640288124422299	0.521985299903722	0.995517635545774
PF3D7_1438000	13.4345451419689	-0.512602050316892	0.478187422641546	-1.07196891019265	0.283733996569096	0.995517635545774
PF3D7_1113100	58.730961311096	0.35130853981241	0.322407312500287	1.08964197210042	0.27587088667701	0.995517635545774
PF3D7_0928800	4.25075519923782	0.264275979336443	0.590604693338478	0.447466778231281	0.654538069625485	0.995517635545774
PF3D7_1362200	4.98189188612965	0.256708603952569	0.581020352867499	0.441823772068637	0.658616734929721	0.995517635545774
PF3D7_1113300	24.9075048360372	0.326031074507829	0.415812424509938	0.784082089158539	0.432991944256534	0.995517635545774
PF3D7_1421900	11.6143219386247	0.517092826017794	0.506438486851621	1.02103777545109	0.307236541798492	0.995517635545774
PF3D7_1421200	32.8766367657171	-0.259023420699076	0.388374810665959	-0.666941865397812	0.504809267852295	0.995517635545774
PF3D7_1443800	7.38396047052499	0.342525220869531	0.550336561196462	0.622392268696201	0.533683962911995	0.995517635545774
PF3D7_1320200	4.64284770818976	0.44786968870075	0.585741728728563	0.764619740637082	0.444498010694082	0.995517635545774
PF3D7_1216500	6.68173271334953	-0.578017235730497	0.585750012376437	-0.986798503657615	0.323741428442457	0.995517635545774
PF3D7_0532100	171.78146487221	-0.36240601572136	0.335823732878555	-1.07915546234613	0.280518430222621	0.995517635545774
PF3D7_1322000	17.061203242131	0.770590341030696	0.464648512562046	1.65843712009688	0.0972292694337094	0.995517635545774
PF3D7_1002900	11.1883115186216	0.536469492538627	0.51665431407124	1.03835287527408	0.299105800405899	0.995517635545774
PF3D7_1001200	84.0899220015943	-0.330250250059119	0.321034000340661	-1.02870801755788	0.303616901252855	0.995517635545774
PF3D7_1249300	5.20061031231281	0.790198896096855	0.579197816699257	1.3642988169397	0.172473538103985	0.995517635545774
PF3D7_0504700	7.11097465613113	0.480361330262811	0.571748898715704	0.840161356395835	0.400817922118351	0.995517635545774
PF3D7_0305200	8.41983598639119	-0.341363482623515	0.542129059941989	-0.629671987441593	0.528909213852585	0.995517635545774
PF3D7_0705900	23.6074829340448	-0.212329104216985	0.435554318604412	-0.487491674740643	0.6259099412099	0.995517635545774
PF3D7_1407200	5.97147201380794	0.726757288044384	0.567367392892862	1.28092889571752	0.200218642242716	0.995517635545774
PF3D7_1216400	10.1657085403102	0.518236149704121	0.520423885059347	0.995796243373848	0.319349155925915	0.995517635545774
PF3D7_1132400	17.4830591526003	0.284033917845451	0.468955623193418	0.605673338366822	0.544731691840783	0.995517635545774
PF3D7_0611100	5.6866385331518	0.59091818378175	0.57027269889219	1.03620282880395	0.300107527342075	0.995517635545774
PF3D7_1332000	9.28327324398554	-0.256173887256639	0.514942374788462	-0.497480688711771	0.618850117613682	0.995517635545774
PF3D7_0526800	4.96812380617159	0.598900312091112	0.589564018111906	1.01583592908045	0.30970752347639	0.995517635545774
PF3D7_0424700	6.25262478092314	-0.970004677682476	0.574673798155411	-1.68792222787257	0.0914261591319769	0.995517635545774
PF3D7_1018600	8.53587888453211	-0.705949293443481	0.529416631161911	-1.33344751919511	0.18238498703948	0.995517635545774
PF3D7_1124600	68.4817490370011	0.381954797763304	0.321589025107517	1.18771092277047	0.234947318964359	0.995517635545774
PF3D7_1424700	14.7452791158185	0.426799144032777	0.50610372741426	0.843303696286413	0.399058616115075	0.995517635545774
PF3D7_1309300	10.8838465945951	-0.400093870739872	0.505969707166147	-0.790746689126373	0.429091824864488	0.995517635545774
PF3D7_1474400	4.79177174797936	-0.809787608924254	0.582971426098233	-1.38906912529844	0.164811731171635	0.995517635545774
PF3D7_1451200	42.2032275766558	-0.229645117578052	0.373843512018101	-0.614281404372567	0.539029388527813	0.995517635545774
PF3D7_1455200	8.33928263636557	0.54183477807914	0.538026056517804	1.00707906525195	0.313896780584721	0.995517635545774
PF3D7_1411500	6.05071040286929	-0.942552991072603	0.573629192854082	-1.64313985901406	0.100353999644127	0.995517635545774
PF3D7_1232500	14.6976976571555	0.510279236670188	0.482848668848045	1.05680986526811	0.290598371024297	0.995517635545774
PF3D7_0107900	5.02854590081222	0.571927044289667	0.582523720834699	0.981809021390842	0.326193942922935	0.995517635545774
PF3D7_1439200	6.34768842856824	-0.397853704157085	0.563340207291952	-0.706240561222531	0.480038550125747	0.995517635545774
PF3D7_0934300	5.80698086951021	0.712738271122273	0.581474922189897	1.22574206371278	0.220295755611723	0.995517635545774
PF3D7_0805000	11.1938255602474	-0.469935492241442	0.520663887203514	-0.902569784060628	0.366754269163712	0.995517635545774
PF3D7_1408700	55.3767276592194	0.563115349024412	0.339782251770682	1.65728299841999	0.0974622729715015	0.995517635545774
PF3D7_1142500	31.7294923704221	-0.560897057316431	0.400216489066208	-1.40148412831547	0.161069350481449	0.995517635545774
PF3D7_1135900	24.3046902190863	0.680110755731604	0.442030773471294	1.53860499437778	0.123900758528739	0.995517635545774
PF3D7_1442100	6.8196651222127	0.68547083443959	0.566528667977994	1.20994906910204	0.226298436710073	0.995517635545774
PF3D7_0409500	10.6400805191268	0.298633326236987	0.523665702524174	0.570274747415221	0.568491365628784	0.995517635545774
PF3D7_0218500	15.6755113466353	-0.407082815355537	0.467283313622716	-0.871169167586015	0.383661792135086	0.995517635545774
PF3D7_1308200	24.4883521250224	0.197594099193651	0.43299570079196	0.45634194250023	0.648144107645037	0.995517635545774
PF3D7_1364400	15.0464072781488	-0.194803358070491	0.467368977587469	-0.416808490533656	0.67681849158426	0.995517635545774
PF3D7_0323700	6.10010512300613	-0.274532998941877	0.565686936451742	-0.485309066290057	0.627457125255839	0.995517635545774
PF3D7_0908000	12.6251473983667	-0.26253722751781	0.49148691033663	-0.534169317628403	0.593224395000869	0.995517635545774
PF3D7_1203900	30.7221695452365	0.337047696333323	0.400764987546156	0.841010833798214	0.400341865169951	0.995517635545774
PF3D7_0210900	21.8900876422532	0.530522337206654	0.426360043935223	1.24430594459563	0.213386984022595	0.995517635545774
PF3D7_1224400	5.24082816461449	0.606721306584411	0.577731697610961	1.05017832515219	0.293636132892031	0.995517635545774
PF3D7_1369700	5.10810050469384	0.516170144443618	0.586627751435144	0.879893839288788	0.378916822463519	0.995517635545774
PF3D7_1427500	14.0095282221536	0.590775279720329	0.495764305854186	1.19164545076	0.233400295492369	0.995517635545774
PF3D7_0627100	22.3985449607955	0.589546808415582	0.441584652653091	1.33507087457301	0.181853150897593	0.995517635545774
PF3D7_0316300	30.493853918696	0.617362885137217	0.403629929678667	1.52952702399623	0.126133844953386	0.995517635545774
PF3D7_1432600	5.3854077858978	0.444410455581279	0.578041333659566	0.768821241151956	0.441999437327635	0.995517635545774
PF3D7_1102700	8.94551427017115	-0.431777342753195	0.566217689752908	-0.762564205547197	0.445723338520622	0.995517635545774
PF3D7_0714000	158.713751227474	-0.457435472725744	0.298738458007195	-1.53122392000406	0.125714060971941	0.995517635545774
PF3D7_1343100	43.6035174561507	0.390334056177952	0.371257650054471	1.05138320010559	0.293082628539634	0.995517635545774
PF3D7_0307100	15.5249554406874	-0.468304156781285	0.476647334709109	-0.982496119624972	0.325855493697366	0.995517635545774
PF3D7_1401600	21.3672468647113	-0.609142815940555	0.494068080701163	-1.2329127092689	0.217608333215145	0.995517635545774
PF3D7_0209700	8.35391694559271	0.419489361633131	0.55571528679762	0.754863815336973	0.450330698997337	0.995517635545774
PF3D7_0415400	8.24378223246296	-0.510397304250032	0.529747269204706	-0.963473214342901	0.335310099948394	0.995517635545774
PF3D7_0626000	6.5011889559153	0.659919092664869	0.579205962031115	1.1393513463686	0.254556640256433	0.995517635545774
PF3D7_0106400	8.96461530075831	-0.358975455632008	0.533926225558506	-0.672331566512783	0.501372638176649	0.995517635545774
PF3D7_0603000	7.37614472893965	0.339906297173211	0.548466324408065	0.619739593930506	0.53542924377939	0.995517635545774
PF3D7_0722300	4.53613200211198	0.440974659718655	0.590000236852675	0.747414377443323	0.454813469395114	0.995517635545774
PF3D7_1410200	4.7818536559903	0.290721377987863	0.583373233491011	0.498345418160743	0.618240600759029	0.995517635545774
PF3D7_1317800	25.4476146177683	-0.288370296693908	0.440852790611206	-0.654119249861403	0.513034980421565	0.995517635545774
PF3D7_1301400	4.82994386100477	-0.756821684435689	0.588882825398787	-1.28518213096668	0.198728646388227	0.995517635545774
PF3D7_1338800	5.0399694272728	-0.296019602998849	0.584198925178242	-0.506710283502374	0.612358114038292	0.995517635545774
PF3D7_0717300	10.9688253977043	0.249106509915569	0.506780789324342	0.491546868316943	0.623039711709512	0.995517635545774
PF3D7_0414000	14.8438008464878	-0.357229307288947	0.498114156515812	-0.717163530921666	0.473273198910876	0.995517635545774
PF3D7_1212000	5.2354641278395	0.363471823635356	0.576579662061612	0.630393070639588	0.528437443340757	0.995517635545774
PF3D7_1404900	46.3764748357108	0.572182679861484	0.362336771809246	1.57914604417438	0.114302562525998	0.995517635545774
PF3D7_0316900	8.75727396446146	-0.284292662414522	0.52345998538198	-0.543102950280082	0.587058921437926	0.995517635545774
PF3D7_1122400	6.05398226379375	0.735530146276956	0.567050561352532	1.29711563025802	0.194591404309704	0.995517635545774
PF3D7_1115300	5.54330709472952	-0.479429592007777	0.575222943384885	-0.833467436445746	0.404581155632354	0.995517635545774
PF3D7_0811300	42.2224056638327	0.404220009963301	0.391785622196579	1.03173773375605	0.30219499552287	0.995517635545774
PF3D7_1456700	13.0389822595823	0.37509044113653	0.491455771932559	0.763223188246537	0.445330302004195	0.995517635545774
PF3D7_1433800	11.4510885129874	0.591942201287476	0.535626694709163	1.10513946958691	0.26909916033857	0.995517635545774
PF3D7_0830500	5.32506624228414	-0.76078773801707	0.590601884364976	-1.28815663843518	0.197691442726847	0.995517635545774
PF3D7_1120200	14.3357513849604	-0.300820233653453	0.488711470083457	-0.61553749414165	0.538199815944944	0.995517635545774
PF3D7_1119700	9.09165262421768	-0.523741860589737	0.532484810662239	-0.983580846068401	0.325321646620711	0.995517635545774
PF3D7_1234200	5.74375382639711	0.655291633629154	0.575616428828991	1.13841718340502	0.254946322199566	0.995517635545774
PF3D7_1361500	6.57576624996034	-0.272626843556366	0.58470763866655	-0.466261812789214	0.641028109180298	0.995517635545774
PF3D7_0513200	14.0505500726302	0.308014446855757	0.478224177378811	0.644079620867374	0.51952380459634	0.995517635545774
PF3D7_0109800	9.19403204030016	0.431388157817328	0.558404473287184	0.77253707384874	0.43979639775794	0.995517635545774
PF3D7_0604500	33.086044191655	0.652091515176296	0.400507190458111	1.62816431442945	0.103490049303359	0.995517635545774
PF3D7_1235900	9.10261005222631	0.379785243837137	0.545153325970581	0.696657666283104	0.486017057932514	0.995517635545774
PF3D7_1333000	8.47523965584911	0.31817293726952	0.538929269286071	0.590379768556658	0.554936071169081	0.995517635545774
PF3D7_0111500	16.5044303166142	-0.328522995022003	0.4501010709837	-0.729887165795924	0.465459157893348	0.995517635545774
PF3D7_1139800	12.6960237706767	0.720155394498041	0.512635138657162	1.40481082975403	0.160077537856605	0.995517635545774
PF3D7_0520300	4.53774796080224	-0.850286250750786	0.591490435332425	-1.43753169951584	0.150566972288714	0.995517635545774
PF3D7_1415000	7.28407273982142	0.282846241567853	0.564153923438959	0.501363599217186	0.616115252982681	0.995517635545774
PF3D7_1113800	12.7867466637394	0.531277700117867	0.515768083986109	1.03007091096427	0.302976719233669	0.995517635545774
PF3D7_1324700	5.66006103809728	0.78500783790409	0.586249510400904	1.33903367760131	0.180559709548816	0.995517635545774
PF3D7_0505000	5.6337295565984	-0.330859697109733	0.571564815612507	-0.578866452364065	0.562679288031402	0.995517635545774
PF3D7_0506700	7.26273080290378	0.509623232723854	0.568126373520052	0.897024423573722	0.369705884580177	0.995517635545774
PF3D7_1123000	34.8912982733379	0.396930177292463	0.388503775981399	1.02168936785692	0.306927944835887	0.995517635545774
PF3D7_0104800	7.0216053140023	0.345410427699842	0.567712548406311	0.608424859851138	0.542905727653188	0.995517635545774
PF3D7_1367000	5.27761612080349	-0.623584461441232	0.573983144849551	-1.08641598109067	0.277294994307002	0.995517635545774
PF3D7_0616700	4.64687211230747	0.305581698838606	0.581235341814957	0.525745213435235	0.599065244874962	0.995517635545774
PF3D7_0915000	6.78167985048167	0.44241104330695	0.558918680648533	0.791548142197724	0.428624194604927	0.995517635545774
PF3D7_0911900	21.0931426061371	-0.572758430486351	0.442046413423227	-1.29569749486459	0.195079724784604	0.995517635545774
PF3D7_1425300	10.6413288617659	-0.693520421903613	0.511576654351535	-1.3556529915985	0.175209602806687	0.995517635545774
PF3D7_1222500	11.3834176993013	0.326792981044265	0.538294382836356	0.60708971050811	0.543791378304128	0.995517635545774
PF3D7_1412100	4.57886428938189	0.427861245521169	0.581568880783712	0.735701753753728	0.461912222149776	0.995517635545774
PF3D7_1130000	8.04674536291717	0.686585933808546	0.574142351167964	1.19584617370908	0.231756593403676	0.995517635545774
PF3D7_0318900	11.8512824589102	0.249006905253422	0.53284456841161	0.467316211922178	0.640273659214562	0.995517635545774
PF3D7_1307500	4.94877345037804	-0.762421875601678	0.588291576807164	-1.29599318715317	0.194977832071856	0.995517635545774
PF3D7_1037300	29.5120868544754	0.37663202409017	0.402078749922773	0.936712084790627	0.34890667825857	0.995517635545774
PF3D7_1348500	11.33561521249	-0.223395244365847	0.516740758193756	-0.432315896943594	0.665511834801936	0.995517635545774
PF3D7_0808400	11.9701756044595	-0.758535127515169	0.506326262034641	-1.49811531494938	0.134103292728604	0.995517635545774
PF3D7_1307600	11.3808236291082	0.60463472575812	0.525921916868493	1.14966634088632	0.250281322666453	0.995517635545774
PF3D7_1007700	15.7992616096749	0.708405654602336	0.485706089297557	1.45850684233103	0.144700890527646	0.995517635545774
PF3D7_0805300	4.32336610470256	-0.296522280408894	0.587581731433372	-0.504648569800741	0.613805689707993	0.995517635545774
PF3D7_1437500	6.20511918944868	0.809458822211343	0.571937700036674	1.41529194903473	0.156982914560074	0.995517635545774
PF3D7_1312100	5.73844798601111	0.255783019792966	0.570731565609948	0.448166940827265	0.654032719630178	0.995517635545774
PF3D7_0617900	620.872202046376	0.341113292506627	0.232426203633251	1.46761977425263	0.142207533598366	0.995517635545774
PF3D7_1324300	19.9494631577149	0.601708564349908	0.444319999342165	1.35422345435894	0.17566509837468	0.995517635545774
PF3D7_1248600	5.75311905279138	0.323339434210231	0.590115553268923	0.547925626462654	0.583742971812385	0.995517635545774
PF3D7_1354400	13.5781296242782	0.211071438312043	0.495999900677561	0.425547339875894	0.670437719295034	0.995517635545774
PF3D7_0722000	8.25203756821162	0.234731802413523	0.551592634984835	0.425552822002377	0.670433723848758	0.995517635545774
PF3D7_1464600	33.2433253742325	-0.373243097843742	0.380661669357009	-0.980511377660382	0.326833756187713	0.995517635545774
PF3D7_0901700	15.3929089335104	0.217584209749455	0.494001728362484	0.440452324874859	0.659609534699934	0.995517635545774
PF3D7_0821800	19.9170159463997	0.198010958363121	0.431668327232503	0.458710880255223	0.64644179976999	0.995517635545774
PF3D7_1407900	17.0501965722625	-0.373757957995257	0.461361221763255	-0.810120010881731	0.417871204306318	0.995517635545774
PF3D7_1428700	6.39260685983455	0.380687439525174	0.579399523281628	0.657037888759417	0.511156554422762	0.995517635545774
PF3D7_0826100	50.5022796075313	0.468064887015358	0.341312065022378	1.3713692980196	0.170259863215487	0.995517635545774
PF3D7_API03600	13.4671833367486	-0.463503547967004	0.479058954160095	-0.967529244453089	0.333279529061135	0.995517635545774
PF3D7_0520900	56.3779158578868	-0.28416217509964	0.358209370500596	-0.793285152486447	0.427611705317524	0.995517635545774
PF3D7_1469400	6.30557017574411	0.286546481633216	0.563650441300676	0.508376221567367	0.61118952525569	0.995517635545774
PF3D7_0724100	17.6384731071748	0.215087632613141	0.45791658750674	0.469709197005175	0.638562796149985	0.995517635545774
PF3D7_1215300	8.47095709765576	-0.488342004544188	0.555447580089708	-0.879186483205701	0.379300172071621	0.995517635545774
PF3D7_0105600	5.38894974231419	0.590285795818249	0.584889834015364	1.00922560367624	0.312866450114989	0.995517635545774
PF3D7_1347500	106.757712292307	-0.251882136658298	0.312915075511332	-0.804953664334321	0.42084641888352	0.995517635545774
PF3D7_0815200	36.7973385693039	0.517564682254951	0.377858437743267	1.36973170520174	0.170770667777553	0.995517635545774
PF3D7_1321400	4.85946103784466	-0.237503436652217	0.581054962399781	-0.408745216926327	0.682726646958284	0.995517635545774
PF3D7_1332900	11.4250257561568	-0.452104118312522	0.493931927071472	-0.915316653031626	0.360025419154078	0.995517635545774
PF3D7_1343300	20.5964087134686	0.402164272590313	0.431357194423146	0.932323090445094	0.351169578101817	0.995517635545774
PF3D7_1027800	49.4176032494451	-0.263105592224423	0.347088096896694	-0.758036920818789	0.448428880287921	0.995517635545774
PF3D7_1455600	4.20203263013624	-0.648702835838242	0.588899575805942	-1.1015508628113	0.270656980526218	0.995517635545774
PF3D7_0721900	5.83203177578625	-0.313752079619388	0.584752528930658	-0.536555318868221	0.591574814661921	0.995517635545774
PF3D7_1131100	14.2587473521323	0.769635832019925	0.484657057935354	1.58800087488375	0.112286141289407	0.995517635545774
PF3D7_0917500	4.93983366120193	0.348058244735854	0.581365304991715	0.598691118557229	0.549378880860977	0.995517635545774
PF3D7_0922500	47.6859549881883	0.148205410630018	0.369486515401738	0.401111825336511	0.688337794871356	0.995517635545774
PF3D7_0313800	5.83411198608675	0.36436134438616	0.587966006540271	0.619697976299934	0.535456648268889	0.995517635545774
PF3D7_1252300	54.4078409232078	-0.377260030936782	0.367915279784474	-1.02539919287338	0.305174868873361	0.995517635545774
PF3D7_0819000	9.33453571070286	0.804372963282335	0.548333058771047	1.46694230890462	0.142391749831279	0.995517635545774
PF3D7_0104300	25.9098821342619	-0.219392114215683	0.417286918490845	-0.525758427820201	0.599056062304563	0.995517635545774
PF3D7_1025200	6.02037856656875	0.369696392279041	0.57201260785204	0.64630811839495	0.518079831273503	0.995517635545774
PF3D7_0626800	108.182237261419	0.26721277940676	0.285280995477642	0.936665195518435	0.348930804612195	0.995517635545774
PF3D7_0623600	6.49494588950358	0.409144717501773	0.565145125916652	0.723963985070472	0.469087845896075	0.995517635545774
PF3D7_0512600	24.8254303585099	0.32198408423097	0.433695435884208	0.742419812591562	0.457833019163735	0.995517635545774
PF3D7_0104400	9.30372771399602	0.393909203164398	0.528174316873642	0.745793936926007	0.455791903097981	0.995517635545774
PF3D7_1402300	9.54735770289014	0.280786407482394	0.529576989153748	0.530208852033175	0.595967134287956	0.995517635545774
PF3D7_1223400	26.8340758579402	0.538622105340825	0.416254891539595	1.2939718338171	0.195675150000763	0.995517635545774
PF3D7_1251200	14.9917580622819	-0.965491577441289	0.566065457229642	-1.70561825511569	0.0880791782750071	0.995517635545774
PF3D7_1356800	18.5388936477905	-0.451381156784677	0.514309543314518	-0.87764491764183	0.380136445253511	0.995517635545774
PF3D7_1124700	10.4653467905274	0.368276518533289	0.537997833129867	0.684531601904037	0.493639541050247	0.995517635545774
PF3D7_1121100	12.3198560233538	0.247772477370695	0.538834730002823	0.459830192031974	0.645638110122678	0.995517635545774
PF3D7_0220600	12.2704548089645	-0.413308194120467	0.516174059911507	-0.800714770888185	0.423296789404676	0.995517635545774
PF3D7_0827500	6.52858841536674	0.616447591622884	0.565673090890538	1.08975944153966	0.275819124327562	0.995517635545774
PF3D7_0718400	13.5196389921722	-0.41355461303535	0.487449982312002	-0.848404201542563	0.396212903567974	0.995517635545774
PF3D7_1225700	10.0678049623021	0.426365131534677	0.552330345804294	0.771938631968178	0.440150775142147	0.995517635545774
PF3D7_1345500	5.72427129301418	0.702324744670569	0.579260479308631	1.21245065002332	0.225339922489426	0.995517635545774
PF3D7_0518200	9.80104499169404	-0.258180719094419	0.521097524022219	-0.495455662697431	0.620278511620396	0.995517635545774
PF3D7_1228300	9.56185448916604	0.336452782030744	0.54355579061296	0.61898481782584	0.535926360583517	0.995517635545774
PF3D7_1417600	28.2394404287002	0.441653085482426	0.461147580931713	0.957726124443936	0.338200879771738	0.995517635545774
PF3D7_1200600	5.02046823820316	-0.58350703746473	0.588108524446112	-0.992175785947474	0.32111178224029	0.995517635545774
PF3D7_1458000	9.55227929435583	-0.656486028378904	0.550108648832761	-1.1933752173718	0.232722456338599	0.995517635545774
PF3D7_1309100	76.306092958018	-0.128237656803908	0.319245824191823	-0.401689378799377	0.687912642158594	0.995517635545774
PF3D7_0519800	16.8740826538844	0.545198142708852	0.465138451935263	1.17212012991077	0.241148829105418	0.995517635545774
PF3D7_1464000	5.90419926338562	0.391785041070041	0.573899243011212	0.682672169097784	0.494814019645078	0.995517635545774
PF3D7_0316500	6.23740771026554	0.884381129373431	0.573729117739306	1.5414611216844	0.123204598123354	0.995517635545774
PF3D7_0614800	5.9784365855345	0.303920284514077	0.57521691085813	0.528357700855278	0.597251090183099	0.995517635545774
PF3D7_1011400	21.1066848563845	-0.421286160125709	0.442360678554856	-0.952358969838831	0.340914960504712	0.995517635545774
PF3D7_0933900	6.28320276432958	-0.279944401496636	0.563627541195642	-0.496683325486153	0.619412382846197	0.995517635545774
PF3D7_1350200	7.74437117727602	-0.647385358264482	0.556831902158027	-1.16262260792801	0.244982654011757	0.995517635545774
PF3D7_0504600	5.60354014134637	0.786782074163795	0.588400689825164	1.33715355499936	0.181172518832723	0.995517635545774
PF3D7_1207000	19.3977891130949	0.495920692888453	0.451276919475587	1.09892766832557	0.271799617048968	0.995517635545774
PF3D7_1104200	24.8664663516856	0.625928479706497	0.439462593043137	1.42430434265666	0.154358390952163	0.995517635545774
PF3D7_1004300	23.1532870665005	0.530860420682163	0.436860171947551	1.21517239329819	0.224300347284106	0.995517635545774
PF3D7_0305600	11.5828198664023	0.241580824667543	0.516375791790381	0.467839175477094	0.639899603047447	0.995517635545774
PF3D7_1120300	6.84731995367881	0.44190491162966	0.56143456150966	0.787099587245586	0.431223571000481	0.995517635545774
PF3D7_1422300	5.90407984230079	0.403907214182092	0.574169518859946	0.703463351701563	0.4817670380594	0.995517635545774
PF3D7_0512300	5.70701109674279	-0.872172472346949	0.586126996712687	-1.48802644689386	0.136743919166866	0.995517635545774
PF3D7_1444300	18.0208016470249	-0.588880623121753	0.448503491279798	-1.31299005374828	0.189186299735127	0.995517635545774
PF3D7_1426900	5.44679891126335	-0.458125553074301	0.569607839989717	-0.804282386777842	0.421233907415968	0.995517635545774
PF3D7_1324600	6.13618182823299	0.247185842487309	0.568674652850233	0.434670054746415	0.66380193731014	0.995517635545774
PF3D7_1218300	5.8852544114364	0.438854007197137	0.570958350794322	0.768627005081193	0.442114769282799	0.995517635545774
PF3D7_0717900	7.02208795210464	0.247506458713842	0.557387691212918	0.444047227119869	0.657008439516101	0.995517635545774
PF3D7_1138700	7.64308221399737	-0.506477998729522	0.536844484012076	-0.943435229033906	0.34545833077289	0.995517635545774
PF3D7_1408400	9.40156692758766	0.267540875697277	0.541099281782008	0.494439532087683	0.620995800905761	0.995517635545774
PF3D7_1143200	13.7273246426448	0.332152426194503	0.506350549505924	0.655973270925851	0.511841322360831	0.995517635545774
PF3D7_1472900	7.17031821071298	0.288383336628494	0.555357185287679	0.519275421779425	0.603568690372157	0.995517635545774
PF3D7_0524500	10.4615278645705	-0.451667947344509	0.533946395453286	-0.845905040638155	0.397605720317456	0.995517635545774
PF3D7_1315000	9.55863711243914	-0.284338839999959	0.547480793642749	-0.519358566184698	0.603510719394757	0.995517635545774
PF3D7_1021000	9.32816564698133	0.279948112795785	0.524723063924648	0.533515928768068	0.593676487639574	0.995517635545774
PF3D7_1307700	12.0467820575742	0.588242894718578	0.503209610685867	1.16898183625073	0.242410949587998	0.995517635545774
PF3D7_1455400	9.92900080460471	0.44638433130136	0.528013053718295	0.845403969007772	0.397885329244928	0.995517635545774
PF3D7_0913800	7.30518853100382	-0.785745102122247	0.586186902106737	-1.34043442338664	0.18010415059866	0.995517635545774
PF3D7_1347700	17.0608648324509	0.334230698717857	0.457561880614691	0.730460103601398	0.465108991293268	0.995517635545774
PF3D7_1315900	14.6437486989809	-0.370214608887292	0.467919504126561	-0.791192941568767	0.42883140978279	0.995517635545774
PF3D7_0303200	18.4450372515721	-0.320597206071909	0.445569211137917	-0.719522799282185	0.471818859712999	0.995517635545774
PF3D7_0402300	10.2153203530697	-0.603092386603568	0.575531428519754	-1.04788784194583	0.294690284485479	0.995517635545774
PF3D7_1135800	13.1115410843723	-0.238193902458764	0.492053026563296	-0.484081774930661	0.628327834974096	0.995517635545774
PF3D7_1002400	13.9645316611245	0.589358982284417	0.476547182646975	1.23672745059751	0.216188284028757	0.995517635545774
PF3D7_0416400	15.2980375327708	-0.284578822024649	0.476713041427481	-0.596960429638131	0.550533799948516	0.995517635545774
PF3D7_0903300	56.900290994703	0.196732678948593	0.342204279576205	0.574898359518565	0.565360039468474	0.995517635545774
PF3D7_0705100	5.53848626866192	0.541981370228299	0.580617723419909	0.933456469492463	0.350584335932238	0.995517635545774
PF3D7_1111100	7.70184224032799	0.284349784954363	0.556016075893254	0.511405690019929	0.609067011443044	0.995517635545774
PF3D7_0925900	55.556754590706	0.242983477051261	0.413325726917345	0.58787406935318	0.556616822697881	0.995517635545774
PF3D7_1007200	9.85068796264205	-0.428271655949353	0.526367689356646	-0.813635913847237	0.415853557388218	0.995517635545774
PF3D7_1407100	12.8256483582774	-0.246642121589923	0.515580722219936	-0.47837731505545	0.632381676559479	0.995517635545774
PF3D7_1355500	17.1507059925272	0.704092863355751	0.47020559831724	1.49741488803098	0.134285336754019	0.995517635545774
PF3D7_1456000	9.54001030681761	0.64109182336967	0.53658113123999	1.19477146333522	0.232176332603988	0.995517635545774
PF3D7_1415600	12.4471273597914	0.469558399737285	0.500033861779539	0.939053203449468	0.347703429055046	0.995517635545774
PF3D7_1359300	7.83910199927133	0.818911561774606	0.548451853099707	1.49313300182383	0.135402375404348	0.995517635545774
PF3D7_0214000	4.88487727364294	-0.339377006081959	0.576985001838274	-0.588190342904415	0.556404538652524	0.995517635545774
PF3D7_1015800	10.9014549910784	-0.58133489620602	0.520744465926453	-1.11635347899813	0.264270858382191	0.995517635545774
PF3D7_1441100	60.6647005821811	0.135969527770648	0.327027940453258	0.415773427745028	0.677575804778208	0.995517635545774
PF3D7_0904800	10.2383853298995	-0.379605610524794	0.528497285300063	-0.718273529653548	0.472588648129202	0.995517635545774
PF3D7_0936600	7.72571527770324	-0.694408493713352	0.55132016562169	-1.25953762806827	0.207836207959485	0.995517635545774
PF3D7_1422100	5.62324134485662	0.285455515542529	0.58074144621185	0.491536323788395	0.623047167635728	0.995517635545774
PF3D7_1333900	4.75104565928345	-0.301821705767173	0.58558877551203	-0.515415797550534	0.606262495612664	0.995517635545774
PF3D7_0936200	4.48751083202833	0.297778591845942	0.581895545880471	0.511738909077523	0.608833750993281	0.995517635545774
PF3D7_0405100	11.4240380456115	-0.461275726869695	0.500991551645354	-0.920725559851809	0.357193728080551	0.995517635545774
PF3D7_0502200	6.26541051983142	0.267191929203511	0.561345364698989	0.475984921237905	0.634085120442477	0.995517635545774
PF3D7_1242900	7.85527447671145	0.260388689302032	0.550819320988084	0.472729767058525	0.636405986697333	0.995517635545774
PF3D7_1369400	14.1378844407018	0.207411468305884	0.484080544047696	0.428464789292272	0.668312763468167	0.995517635545774
PF3D7_0409700	6.42105236186472	-0.449022956995253	0.558916644610874	-0.803380900040773	0.421754611191159	0.995517635545774
PF3D7_1127900	4.78799906619845	-0.526041080865695	0.590752762797505	-0.890458943221241	0.373219504637614	0.995517635545774
PF3D7_0931500	6.29974097064765	-0.288066636938981	0.578822971555354	-0.497676580051613	0.618712017827187	0.995517635545774
PF3D7_1434700	7.86452834406936	-0.367267405569299	0.562704390745397	-0.652682672482424	0.513960875510502	0.995517635545774
PF3D7_0824700	8.08258460336944	0.279242606928317	0.550004177825316	0.507709974190424	0.611656752515687	0.995517635545774
PF3D7_0312400	34.2696302618114	0.540811976184735	0.392897240684733	1.37647181039556	0.168675608941791	0.995517635545774
PF3D7_1436300	27.4156205048428	-0.626876033701133	0.433206315582313	-1.44706116035841	0.147879794805422	0.995517635545774
PF3D7_0626100	4.25593404231401	0.245293477258893	0.58914240997925	0.416356848707483	0.677148899343498	0.995517635545774
PF3D7_0415200	11.3312553045947	0.26984680960093	0.518735169126304	0.520201493288816	0.60292314464687	0.995517635545774
PF3D7_1342900	11.396399233124	0.4825588066645	0.530111714183299	0.910296440832175	0.362666195065374	0.995517635545774
PF3D7_1030100	6.9332210940751	0.938360018037013	0.572483757454218	1.63910330348902	0.1011917471833	0.995517635545774
PF3D7_0817900	101.134048140533	-0.411274107623432	0.324013362747594	-1.26931217939865	0.2043297441516	0.995517635545774
PF3D7_0935800	25.1611866405187	-0.659988056679864	0.487572635010548	-1.35361997226441	0.175857651680322	0.995517635545774
PF3D7_0524600	9.21035287390738	0.573173451984483	0.530896586251579	1.07963295833451	0.280305658795617	0.995517635545774
PF3D7_0108700	25.6133616680392	0.36633760585998	0.418226081587254	0.87593199465144	0.381067004887361	0.995517635545774
PF3D7_1108100	4.5589795091455	-0.444067410668263	0.591182064488363	-0.751151696478783	0.452561366552854	0.995517635545774
PF3D7_1406800	29.9986457278542	0.374970332329172	0.473532432124016	0.79185776283	0.428443617177869	0.995517635545774
PF3D7_1305600	5.27318712745856	0.689508868232583	0.5796883660284	1.18944748357914	0.234263625047412	0.995517635545774
PF3D7_1403100	14.0146616933422	0.800883952749805	0.500039519383931	1.60164131374361	0.10923494946055	0.995517635545774
PF3D7_0319600	21.9520468730404	-0.280676016687032	0.452639572600615	-0.620087225415188	0.535200362075511	0.995517635545774
PF3D7_1107200	4.81322072469925	-0.45717646639524	0.580809470465863	-0.787136728381069	0.43120183094837	0.995517635545774
PF3D7_0527600	12.3025872541676	0.535033058184801	0.505277521437625	1.05888949237741	0.289650110215138	0.995517635545774
PF3D7_0210200	22.791502762709	-0.390461341918152	0.436983831464968	-0.893537274844125	0.37156951992505	0.995517635545774
PF3D7_1111800	5.00516589262457	-0.459262329771076	0.587229000062892	-0.782083871406026	0.434165284705676	0.995517635545774
PF3D7_1460900	4.53460110499295	-0.520057206282056	0.584364286214157	-0.889953781486683	0.373490703837506	0.995517635545774
PF3D7_0817500	6.73056213185234	0.359065412625863	0.575066727711615	0.624389127944691	0.53237206334916	0.995517635545774
PF3D7_1116600	7.87922961181633	0.516587078455181	0.554462521419442	0.931689804989346	0.351496856740232	0.995517635545774
PF3D7_1215100	4.27236179206087	-0.711463156764577	0.591330297392451	-1.20315694951175	0.228915590788201	0.995517635545774
PF3D7_1147600	5.49460553339698	0.344192373306709	0.57763760390057	0.595862130481995	0.551267333580523	0.995517635545774
PF3D7_0912400	29.8620370494845	0.247106183966972	0.39243701522787	0.629670939229543	0.528909899803967	0.995517635545774
PF3D7_0305500	47.562407644486	0.229755173756561	0.35712158600662	0.643352804084774	0.519995200254861	0.995517635545774
PF3D7_1447200	8.63098063541428	0.301140921116108	0.538464841276186	0.559258280266527	0.57598546351949	0.995517635545774
PF3D7_0828900	8.10857713379571	0.373692085868527	0.559370839780996	0.668057859460165	0.504096659903415	0.995517635545774
PF3D7_1126000	11.1862487406312	-0.238675340711913	0.499965898738203	-0.477383240165527	0.633089246429966	0.995517635545774
PF3D7_1022900	11.5589504131515	-0.393608514806198	0.524668620636172	-0.750204032268862	0.453131830649141	0.995517635545774
PF3D7_0716200	9.94846011259563	0.289178359565479	0.52651295843749	0.549233128893277	0.582845471933266	0.995517635545774
PF3D7_0211900	6.08799982233402	0.799637982795017	0.570095611544443	1.40263837609401	0.160724702014807	0.995517635545774
PF3D7_1227600	15.1560425171942	0.574776872131941	0.500715351760702	1.14791142334824	0.251005131914767	0.995517635545774
PF3D7_0905400	90.8764173343983	-0.404249150405557	0.39310728761151	-1.02834305835881	0.303788483344494	0.995517635545774
PF3D7_0313100	12.44825588199	-0.230312455864024	0.519275187421225	-0.443526787805479	0.657384747710862	0.995517635545774
PF3D7_1033600	10.1029335973938	0.273903717363015	0.527170694269148	0.519573110456655	0.603361143730459	0.995517635545774
PF3D7_0622900	8.8838791890948	0.530289818716365	0.529647657795478	1.00121243039865	0.316724118232778	0.995517635545774
PF3D7_1104400	59.8059723601051	-0.191355975360909	0.374630035545333	-0.51078652858776	0.609500543200964	0.995517635545774
PF3D7_0623800	13.6986619844359	-0.385572438229293	0.490934881686535	-0.785384075592092	0.432228414560931	0.995517635545774
PF3D7_1013600	17.867428341231	0.690067124345456	0.464756913318837	1.48479152126576	0.137599058619062	0.995517635545774
PF3D7_0302500	103.782383786251	-0.405819136436615	0.444607808759944	-0.912757554952724	0.361370066217453	0.995517635545774
PF3D7_0914400	9.38525833961867	0.256821894509332	0.565281525721398	0.454325646290283	0.649594459738271	0.995517635545774
PF3D7_1320000	14.9304350922356	0.311984418359659	0.476065236578836	0.655339634966173	0.512249107550198	0.995517635545774
PF3D7_1243600	71.0125530932724	-0.348199887122981	0.323541528576192	-1.07621389023939	0.281831608997226	0.995517635545774
PF3D7_1027700	4.22306345044048	0.763578977195976	0.590136648331058	1.29390197906777	0.195699280832913	0.995517635545774
PF3D7_1407800	64.8472511510627	0.287655040738712	0.395621817803258	0.727095998739287	0.467167149720882	0.995517635545774
PF3D7_1406600	9.30153825716389	0.245777281317869	0.518335839895305	0.474166095417041	0.635381468741198	0.995517635545774
PF3D7_0615400	27.1276984542745	0.44588037804876	0.406443960911718	1.09702793233434	0.272629181874557	0.995517635545774
PF3D7_1422400	6.61598407812829	-0.84173963433148	0.557369703957066	-1.51019983389036	0.130992441075901	0.995517635545774
PF3D7_1317100	25.3697405647683	-0.276191905229217	0.42709865681979	-0.646670039390346	0.517845517642155	0.995517635545774
PF3D7_0715900	23.7588158931036	0.237475816884759	0.439040749982952	0.540896982555675	0.588578590839537	0.995517635545774
PF3D7_0201900	22.5062111908928	-0.261529968731089	0.42058547584329	-0.621823585816205	0.534057875651225	0.995517635545774
PF3D7_0219600	9.20773752574472	-0.559675636832201	0.539139222109131	-1.03809111613644	0.299227637023877	0.995517635545774
PF3D7_1318400	12.5163246276998	0.396455225712749	0.496699438434085	0.798179331473839	0.424766429764805	0.995517635545774
PF3D7_1331300	13.8149122677829	-0.279091281725492	0.526697318908115	-0.529889315373904	0.596188674614812	0.995517635545774
PF3D7_0523000	29.9172294541982	-0.483290491551236	0.404114463458409	-1.19592475709788	0.231725923005431	0.995517635545774
PF3D7_1335100	40.0811385217846	-0.550867924465212	0.433552955138109	-1.27058971213732	0.203874648811544	0.995517635545774
PF3D7_1203800	9.38797514355322	0.307907411546821	0.537262150306982	0.573104603350317	0.566573870556672	0.995517635545774
PF3D7_1232200	5.72115965867306	0.64790486915499	0.574092772186944	1.12857172315002	0.259078544795218	0.995517635545774
PF3D7_1110900	6.16004709789404	0.609892297049434	0.568031202532224	1.07369506169837	0.282959375414258	0.995517635545774
PF3D7_0508900	21.6881153514301	0.528701958635363	0.480622878717107	1.1000349380924	0.271316899506303	0.995517635545774
PF3D7_0508100	8.75242130956094	0.666000019964131	0.540588130939228	1.23199156963918	0.217952233298247	0.995517635545774
PF3D7_0210100	23.8422960480999	-0.348225663829739	0.417800693954642	-0.833473158059292	0.404577930018956	0.995517635545774
PF3D7_1210100	15.4086443834043	0.267916262045551	0.486005164114936	0.551262171325798	0.581453966421261	0.995517635545774
PF3D7_0110700	16.0285899552135	0.278349630505888	0.475416410335191	0.585485953902261	0.558221008459366	0.995517635545774
PF3D7_0112000	4.68255390732825	0.369284281218528	0.584809710900774	0.631460583391688	0.527739414110501	0.995517635545774
PF3D7_0828500	8.66134323739539	0.289295446732948	0.526666228700026	0.549295608809052	0.58280260039632	0.995517635545774
PF3D7_1015900	82.9259998643611	-0.471585319212343	0.308924299245077	-1.52654006293698	0.126875420967279	0.995517635545774
PF3D7_1202700	5.05313834070617	0.673827635559803	0.583885463071381	1.15404078055875	0.2484834501475	0.995517635545774
PF3D7_1243100	6.53587300148188	-0.428275361460254	0.578482082940054	-0.740343346994613	0.4590916852005	0.995517635545774
PF3D7_1476300	13.3208041603195	-0.691579585447644	0.532127932115516	-1.29964909509301	0.193721264764377	0.995517635545774
PF3D7_0309800	4.16319173366795	-0.39181188714626	0.591117227353809	-0.662832800357117	0.507437643920053	0.995517635545774
PF3D7_1212100	6.84922518321351	0.466813244524518	0.557211651677803	0.837766480867568	0.402161867504835	0.995517635545774
PF3D7_0710000	19.802459906843	0.481384755970982	0.4549283057239	1.05815520800576	0.289984688285998	0.995517635545774
PF3D7_1112400	5.00654284845796	-0.44465959402489	0.584078246992309	-0.761301411779413	0.446477057534912	0.995517635545774
PF3D7_1360100	6.29187606609286	-0.321183067613158	0.558760262278262	-0.574813724769156	0.565417283526343	0.995517635545774
PF3D7_1113500	4.59643932094729	-0.518581311914094	0.587639707374457	-0.882481740778014	0.377516349604823	0.995517635545774
PF3D7_0209800	43.2711540054393	-0.225995683521851	0.345285183023194	-0.654518915474777	0.51277754467952	0.995517635545774
PF3D7_0615300	9.97429914251166	0.562087919250215	0.523715698810401	1.0732691812122	0.283150358615767	0.995517635545774
PF3D7_1335700	8.2543952589189	0.580682427502233	0.539839096181539	1.07565834266097	0.282080084346162	0.995517635545774
PF3D7_0602900	6.74760560101445	0.692053102401329	0.567048616082662	1.22044756441209	0.222295255669788	0.995517635545774
PF3D7_0207600	94.1899598323878	0.223914774097059	0.34460278671419	0.64977644618635	0.515836635508078	0.995517635545774
PF3D7_0619000	11.4268061250202	0.219048504451625	0.51529883085823	0.425090241495017	0.670770891419436	0.995517635545774
PF3D7_1120700	4.95074407730475	0.34757887057726	0.582163632909013	0.597046690877003	0.550476208023058	0.995517635545774
PF3D7_1410900	6.64246305593379	-0.408325490014501	0.556790801338745	-0.733355308731261	0.463341749530285	0.995517635545774
PF3D7_1252700	19.5282570906883	-0.543915736191897	0.43255587786936	-1.25744617983476	0.208592116096785	0.995517635545774
PF3D7_1020700	4.76589773617278	-0.606177106610352	0.585771034497022	-1.0348362600941	0.300745385907987	0.995517635545774
PF3D7_0104200	43.6891115049303	0.347860061807322	0.355487716905859	0.978543126145321	0.327805772604502	0.995517635545774
PF3D7_1145300	7.77486641735126	-0.276415022490533	0.545085771551109	-0.50710372003283	0.612082044979265	0.995517635545774
PF3D7_0505700	12.3292163407572	0.213371242716618	0.503458307080481	0.42381114725059	0.671703547839718	0.995517635545774
PF3D7_0510500	7.10661777745185	0.660514288321663	0.564786797343763	1.16949314578194	0.24220500119063	0.995517635545774
PF3D7_1326000	7.88682652458445	-0.512534168083038	0.55496421700291	-0.923544532025837	0.35572350459894	0.995517635545774
PF3D7_1127800	7.38165129827378	-0.637750786754953	0.55377051068951	-1.15165176629012	0.249464200142979	0.995517635545774
PF3D7_0203400	20.812362249237	-0.214929748158098	0.431894646571515	-0.497643927435228	0.618735036385415	0.995517635545774
PF3D7_0307400	10.3229890446659	0.386578203361463	0.508700500999558	0.759932814302063	0.447294745802843	0.995517635545774
PF3D7_0811400	24.1168399531507	0.291995008723436	0.41527233009207	0.703141017506989	0.481967872430183	0.995517635545774
PF3D7_0826900	5.80316795865054	-0.371846002819193	0.57613199702765	-0.645418072139025	0.518656295043818	0.995517635545774
PF3D7_1224500	26.3500321395297	-0.310965109435015	0.429215717787131	-0.724496090306828	0.468761226570601	0.995517635545774
PF3D7_1230800	7.94690207750233	0.26950420939774	0.545178873244522	0.494340889979541	0.6210654518347	0.995517635545774
PF3D7_0320900	243.360230721436	-0.217985489825	0.312736692085142	-0.69702563000076	0.485786754239321	0.995517635545774
PF3D7_0416900	9.0704363389259	-0.371759145397766	0.534923011303163	-0.694976917317685	0.487069767353588	0.995517635545774
PF3D7_0214900	12.7289061126564	-0.615188393836267	0.500844017088972	-1.22830336960376	0.21933310654082	0.995517635545774
PF3D7_1033400	23.2814845397936	-0.401884480435382	0.426231167757981	-0.942879148301928	0.345742721584599	0.995517635545774
PF3D7_1013200	14.5894461691016	0.406728862829542	0.473634640803469	0.858739686226437	0.390484149900839	0.995517635545774
PF3D7_1438600	5.91587268067557	0.250041043763038	0.575928217433409	0.434153139565434	0.66417723919241	0.995517635545774
PF3D7_1353100	7.19753862720715	-0.411744267646844	0.588891557444411	-0.699185210658605	0.484436291880608	0.995517635545774
PF3D7_1252600	4.52579142232119	-0.468236762743082	0.588573028731327	-0.795545734999732	0.426296118060156	0.995517635545774
PF3D7_0517700	17.9078658253225	-0.72309284473677	0.472378258678043	-1.53074963009592	0.1258312826894	0.995517635545774
PF3D7_1339400	9.36297852136515	-0.701251607804005	0.520547505744782	-1.347142383865	0.177934379942808	0.995517635545774
PF3D7_0305300	13.8435566652565	0.22764504377455	0.491315927001253	0.463337399143524	0.643122542507802	0.995517635545774
PF3D7_1124100	6.86946109460729	0.592638383729138	0.560610189164979	1.057130953349	0.290451826265062	0.995517635545774
PF3D7_0930700	4.58957729028141	0.407294331079691	0.58460700398095	0.696697658950668	0.485992024183102	0.995517635545774
PF3D7_0524100	20.4565001058003	-0.344059240445778	0.429660788267421	-0.800769467079309	0.423265118172971	0.995517635545774
PF3D7_1422700	8.2329056353904	0.395880898042958	0.546172322251535	0.724827827984733	0.468557661502758	0.995517635545774
PF3D7_1432100	24.0200752314934	0.308532486874351	0.413309737056659	0.74649218058963	0.455370153386885	0.995517635545774
PF3D7_0929400	93.8259861901226	-0.157920784481567	0.392432331998517	-0.402415325152577	0.687378393330569	0.995517635545774
PF3D7_0418200	18.33454418106	-0.282095256795226	0.470846393873336	-0.599123749201132	0.549090365614268	0.995517635545774
PF3D7_0210600	8.87939617415117	-0.885760915907389	0.549393476880964	-1.61225233494956	0.106907040972971	0.995517635545774
PF3D7_1021800	28.0229513644766	-0.196734829458047	0.40992594933325	-0.479927727868994	0.631278784110743	0.995517635545774
PF3D7_1001300	4.37741423302921	-0.380876421402759	0.582324838838909	-0.654061781328416	0.513072003038395	0.995517635545774
PF3D7_1419000	16.0790880094095	0.410291699092957	0.475596384749215	0.86268885182823	0.388308563432019	0.995517635545774
PF3D7_0308300	8.76762783044338	-0.217516087274999	0.522854748944435	-0.416016279309179	0.677398090907267	0.995517635545774
PF3D7_0723800	29.3103794473326	0.574622653094242	0.416274548298979	1.38039343371417	0.167465540819643	0.995517635545774
PF3D7_1460500	14.8243282414122	0.434875749975449	0.498009416882553	0.873227965643081	0.382538834690798	0.995517635545774
PF3D7_1253400	10.3966779878095	-0.852926148873581	0.543832817620135	-1.56836093968376	0.116796921435026	0.995517635545774
PF3D7_1436000	13.6003618965349	0.343352733239612	0.497594549826894	0.690025108512662	0.490178397662915	0.995517635545774
PF3D7_0530400	4.34155007132187	-0.391662693380433	0.589285684992053	-0.664639755139674	0.506280935230272	0.995517635545774
PF3D7_0403800	21.9578264231306	-0.580084697406697	0.46284110973224	-1.25331282206605	0.210091883913658	0.995517635545774
PF3D7_1449200	50.7223543168484	-0.538118607036378	0.448746629856539	-1.19915910501302	0.230466085392461	0.995517635545774
PF3D7_1206200	22.1164533409733	0.484874902480386	0.448945859432151	1.08002979043771	0.280128914500571	0.995517635545774
PF3D7_0508000	13.6518551587077	-0.540166440503425	0.478895379075252	-1.1279424778466	0.25934421289371	0.995517635545774
PF3D7_0937800	8.01726918397413	-0.555022842649223	0.561980502811779	-0.987619392260507	0.323339085301593	0.995517635545774
PF3D7_0218700	5.20020035359	0.248004592702715	0.578596477063615	0.428631356280187	0.66819152256769	0.995517635545774
PF3D7_1359600	90.3932889960198	0.332866809853217	0.333737840375408	0.997390075631786	0.31857520667492	0.995517635545774
PF3D7_0830100	10.2829251095161	0.662937946913045	0.558094562219747	1.18785953454966	0.234888754437479	0.995517635545774
PF3D7_0801100	136.677458568523	-0.584655519780912	0.359348035568588	-1.6269896087113	0.103739304760243	0.995517635545774
PF3D7_1334200	8.50038332023144	0.270813861631314	0.561954447438931	0.48191425989336	0.629866855700366	0.995517635545774
PF3D7_1133300	6.92727957676627	-0.299927531268073	0.556838262520067	-0.538625937647854	0.590144986645916	0.995517635545774
PF3D7_0904700	14.3149396878076	0.3120279597811	0.481587127441004	0.64791590555818	0.517039342676595	0.995517635545774
PF3D7_0529400	27.767290044129	0.466234425942038	0.395540311532886	1.17872796361813	0.23850651690499	0.995517635545774
PF3D7_1028300	4.60687932045225	-0.59576752091028	0.584027022836553	-1.020102662402	0.307679774223151	0.995517635545774
PF3D7_1310000	5.84782823584122	-0.712000384253077	0.564825342758995	-1.26056734773121	0.207464769049382	0.995517635545774
PF3D7_1476200	5.29545269907977	-0.451505007616564	0.578654064387601	-0.780267581969547	0.435233390169538	0.995517635545774
PF3D7_1229000	4.32131267859979	-0.281176915358656	0.591305245456443	-0.475519061464792	0.634417050187284	0.995517635545774
PF3D7_0826500	12.6007061525457	0.228008464709895	0.490958407653227	0.464415032221918	0.642350422214191	0.995517635545774
PF3D7_1111300	6.94783855498921	-0.268613004051384	0.581590972155307	-0.461858964309462	0.644182463129925	0.995517635545774
PF3D7_1402700	6.04504126457807	0.439517455983941	0.568822490763144	0.772679461732035	0.439712104508379	0.995517635545774
PF3D7_0731100	6.81975695480831	-0.420202482595343	0.560606791554765	-0.749549397055947	0.453526137434592	0.995517635545774
PF3D7_1219900	8.3079511393039	0.53528324139479	0.548809556150404	0.975353354175365	0.329385013250208	0.995517635545774
PF3D7_1428900	7.54557224193108	0.450758312048975	0.567601931490657	0.794145134187929	0.427110944847383	0.995517635545774
PF3D7_0909600	12.4797862547657	0.45342787162658	0.511410413175765	0.886622289935153	0.375282289100475	0.995517635545774
PF3D7_0320500	13.1501615339625	0.683966195435559	0.493810049818211	1.38507953754151	0.166028148066781	0.995517635545774
PF3D7_1245900	4.34692159128217	-0.713042810078347	0.587832019191826	-1.21300437335595	0.225128148460058	0.995517635545774
PF3D7_0506800	6.67821367600911	0.541439858284473	0.568101741794167	0.95306847075404	0.340555379774104	0.995517635545774
PF3D7_0527100	20.7172772677775	-0.733820543703195	0.440876914907271	-1.66445671998394	0.0960211932489836	0.995517635545774
PF3D7_1421100	7.91419259407514	-0.624371926813687	0.552243981838468	-1.13060883838896	0.258219765822364	0.995517635545774
PF3D7_1209500	5.3830407674367	-0.922281296880192	0.582700268659787	-1.58277136031092	0.113473586667942	0.995517635545774
PF3D7_1130500	7.12289843673697	0.400025078826889	0.571541456983871	0.699905621786203	0.483986246329992	0.995517635545774
PF3D7_1213600	18.598257756029	-0.239950708755711	0.458449124323102	-0.523396590864901	0.600698296098257	0.995517635545774
PF3D7_1439800	18.2335043625712	0.493163103551419	0.458881401565267	1.07470710704164	0.282505880831744	0.995517635545774
PF3D7_1115200	10.8827000820407	-0.309082103431047	0.521708493081241	-0.592442154057316	0.553554545573777	0.995517635545774
PF3D7_1016300	424.629725663286	0.115070166407189	0.265826680202059	0.432876663545293	0.665104374444711	0.995517635545774
PF3D7_1308800	5.93325243367614	0.936511503746141	0.578673094926119	1.61837747764255	0.105581272736303	0.995517635545774
PF3D7_1126300	10.7108964918499	0.721461577200336	0.512300252885379	1.40827878404689	0.15904853537361	0.995517635545774
PF3D7_1004700	5.2863949012412	-0.264672368766216	0.576745888733975	-0.458906381365289	0.646301396044826	0.995517635545774
PF3D7_1304000	6.70972292618896	-0.310342933924465	0.58231284069623	-0.532948807299887	0.594069017954211	0.995517635545774
PF3D7_0308500	9.53247687133512	-0.52287405474312	0.542482440711207	-0.963854339796915	0.33511895857944	0.995517635545774
PF3D7_1445700	10.7057578098557	0.597333226526572	0.52583985301383	1.13596035580601	0.255973156419296	0.995517635545774
PF3D7_0920600	6.07495043391872	0.779815466971948	0.567748433202723	1.37352288684081	0.169589851211591	0.995517635545774
PF3D7_0505800	45.8945294003785	0.200145256267178	0.363317052191847	0.550883188828398	0.581713752395714	0.995517635545774
PF3D7_0812500	19.0987090324147	0.186266753785202	0.440043504197136	0.423291679137606	0.672082464454372	0.995517635545774
PF3D7_1140900	5.69528848477228	0.892676326625939	0.579762619753285	1.53972728874072	0.123626842136838	0.995517635545774
PF3D7_0414200	8.17863043228622	-0.237914794210405	0.534964703890464	-0.444729890552029	0.65651496560344	0.995517635545774
PF3D7_0524400	11.8361232247539	-0.456918404514822	0.489031299836831	-0.934333660580164	0.35013180618372	0.995517635545774
PF3D7_1351200	14.0319023390391	0.439929138010474	0.487286881320605	0.902813424441499	0.366624925118682	0.995517635545774
PF3D7_1116100	30.4903432837778	0.265717722298264	0.412693046851251	0.643862852368428	0.519664372283001	0.995517635545774
PF3D7_0316100	4.57578525313787	0.315564029727184	0.589349187650188	0.535444921855883	0.592342234052479	0.995517635545774
PF3D7_1231600	9.89844707380621	-0.394498673404684	0.531563647471055	-0.742147577776499	0.457997926066409	0.995517635545774
PF3D7_1328200	7.12743991935832	0.565379494538094	0.564245214615625	1.00201026059785	0.316338637275016	0.995517635545774
PF3D7_1037100	4.24100545263453	0.250289397590025	0.591091607630308	0.423435884318233	0.671977268236098	0.995517635545774
PF3D7_1422000	9.82259777535903	0.272843678844795	0.532755441764359	0.512136821993224	0.608555255568829	0.995517635545774
PF3D7_1119900	8.53575763103075	0.388273607280401	0.540538631037175	0.71830871095261	0.472566960278129	0.995517635545774
PF3D7_1105600	12.1584750888228	-0.822507904919058	0.512204216379942	-1.60582025414047	0.108313409097783	0.995517635545774
PF3D7_1321800	7.75244520858136	-0.310488720224977	0.559092320939037	-0.555344276064261	0.578659199645922	0.995517635545774
PF3D7_1136800	12.2966256678405	0.518917086685778	0.500792478072538	1.03619185472393	0.300112646000159	0.995517635545774
PF3D7_0510200	9.87110281305985	-0.34652308719124	0.529877986940155	-0.653967697719016	0.513132616975752	0.995517635545774
PF3D7_1035100	4.1689551355275	-0.589596559990755	0.591073932259149	-0.997500528803991	0.318521617251086	0.995517635545774
PF3D7_1464500	28.455687997766	0.594543791184982	0.414083007661518	1.43580823212861	0.151056916704287	0.995517635545774
PF3D7_1237200	7.79561228604518	-0.515059005896933	0.536899826630388	-0.959320492110178	0.33739731510632	0.995517635545774
PF3D7_0806100	5.68697063340051	0.255551596077874	0.570752691490034	0.447744881256221	0.65433732676385	0.995517635545774
PF3D7_1246200	139.586937659967	-0.291400327545126	0.325637848926381	-0.89486012914612	0.370861862577269	0.995517635545774
PF3D7_1224900	5.24702101779529	-0.873636867801226	0.583546891745574	-1.49711510790144	0.134363309294483	0.995517635545774
PF3D7_1220300	15.7077832260965	0.296828173567755	0.459190988007514	0.646415503178163	0.518010302870834	0.995517635545774
PF3D7_1457200	37.1582920229414	-0.276238347418373	0.369551180126506	-0.747496861798168	0.454763696411819	0.995517635545774
PF3D7_1336700	22.8669812351144	0.469330231550753	0.433846171620406	1.08178949648862	0.279346074841008	0.995517635545774
PF3D7_0826700	92.1308272410862	-0.345748337423206	0.316472221994831	-1.09250769386279	0.274610010561107	0.995517635545774
PF3D7_0528100	19.3336654010776	-0.422918778618929	0.429304645187241	-0.985125093241125	0.3245626289463	0.995517635545774
PF3D7_0906600	17.7213164662511	0.208836785996662	0.457168905093073	0.456804440700415	0.647811613661233	0.995517635545774
PF3D7_1142400	5.78218190210304	-0.558365589752554	0.569407581177509	-0.980607930435137	0.326786122045511	0.995517635545774
PF3D7_0804500	34.9043480783949	0.552078845980545	0.413735602144284	1.33437597131904	0.182080670861541	0.995517635545774
PF3D7_0314100	5.05698666452322	-0.950695545807319	0.581370516718816	-1.63526618304094	0.101993259402544	0.995517635545774
PF3D7_0908200	6.74157394697307	0.947525930394611	0.564271984746643	1.67920073299412	0.09311292918019	0.995517635545774
PF3D7_1236100	13.7899061143701	0.832914552257052	0.511142650885887	1.62951487380966	0.103204068781638	0.995517635545774
PF3D7_0410700	11.504937824761	0.222741917965204	0.530559419173566	0.419824641530559	0.674613562219846	0.995517635545774
PF3D7_1423000	4.78247529837217	-0.299851848060326	0.587780874462776	-0.510142233420552	0.609951818985249	0.995517635545774
PF3D7_1221800	4.85031866516747	0.286489783625421	0.587628469573994	0.487535574702692	0.625878838736837	0.995517635545774
PF3D7_0601900	18.1230143105605	-0.197405157699875	0.465737824319433	-0.423854682596022	0.671671795556846	0.995517635545774
PF3D7_1114700	12.5672912296123	0.259698455863819	0.536506377738591	0.484054741266012	0.62834702000887	0.995517635545774
PF3D7_1129000	33.6338678095279	-0.41142362395586	0.427495147754829	-0.962405365573447	0.335846019475437	0.995517635545774
PF3D7_0630600	10.9871840749857	-0.396205926039443	0.521597027903318	-0.759601579081242	0.447492774966047	0.995517635545774
PF3D7_1446200	16.5993883805635	0.301785190659089	0.480232281325366	0.62841504495743	0.529732083816819	0.995517635545774
PF3D7_0914100	8.78621095759695	-0.805111895565829	0.572306872868609	-1.40678355220568	0.159491581237832	0.995517635545774
PF3D7_0934500	8.42774668191866	-0.252971016883155	0.534327544696511	-0.473438098772987	0.635900654042649	0.995517635545774
PF3D7_1223500	14.0625034330107	0.511878291021559	0.475437507133806	1.07664684283627	0.281638068703408	0.995517635545774
PF3D7_0801200	17.0823130740611	-0.507234432672591	0.470854618460533	-1.07726336917115	0.281362622170131	0.995517635545774
PF3D7_1125800	9.97631231784534	-0.770723483275018	0.584573723676144	-1.31843675495411	0.18735748364545	0.995517635545774
PF3D7_0111300	14.3613084795912	0.522922827080971	0.471661065241145	1.10868347128381	0.267566754758705	0.995517635545774
PF3D7_0215000	6.57912231141057	0.794606117086127	0.569718398108593	1.39473487204229	0.163095804930573	0.995517635545774
PF3D7_1457700	6.10291632615338	0.249157690524421	0.563246743218323	0.442359753561581	0.658228897713124	0.995517635545774
PF3D7_1250300	8.13930336943599	0.823798436335121	0.549499732334352	1.49917895835092	0.133827212211782	0.995517635545774
PF3D7_1237100	9.52518913216235	0.554790396708892	0.533315882931666	1.04026603081682	0.298216321435835	0.995517635545774
PF3D7_1408000	57.1673063270888	-0.522806673704136	0.326404698290765	-1.6017130771764	0.109219072027721	0.995517635545774
PF3D7_0613700	6.22905331678452	-0.315721487089165	0.566563182034643	-0.557257331751324	0.577351623635172	0.995517635545774
PF3D7_1250200	22.2640319924945	-0.30059401499336	0.433809091529161	-0.692917739307346	0.488361176504967	0.995517635545774
PF3D7_0804000	24.2398902524225	-0.512582683361912	0.415677916256126	-1.2331246460687	0.217529263555255	0.995517635545774
PF3D7_0626400	4.93815378644797	0.42935527421406	0.578358419440095	0.742368849112139	0.457863887880311	0.995517635545774
PF3D7_1239000	7.79242265758559	-0.566350218349028	0.539339726243681	-1.05008066491498	0.293681027475714	0.995517635545774
PF3D7_1018200	14.7465432565092	-0.492418805443279	0.521903289155786	-0.943505848065836	0.345422225460901	0.995517635545774
PF3D7_0831200	7.98040177647209	0.802171310778302	0.55708228587426	1.43995120849949	0.149881203641526	0.995517635545774
PF3D7_0611800	15.02619150377	-0.203839246516297	0.497070313574418	-0.410081312340893	0.681746300787831	0.995517635545774
PF3D7_0201500	8.51807121629525	0.266101056919275	0.531040872067907	0.501093363836686	0.616305417011364	0.995517635545774
PF3D7_1444500	5.43131745598907	0.318603539332922	0.574986153654496	0.554106455099731	0.579505992680495	0.995517635545774
PF3D7_1303400	8.19124186655641	0.291448586937155	0.54162220294418	0.538103100930654	0.590505871763037	0.995517635545774
PF3D7_1012300	8.06686662325642	-0.224011345289911	0.552716758709156	-0.405291393394836	0.685263332108309	0.995517635545774
PF3D7_0205600	5.11239451757089	0.780362882304507	0.585232012453021	1.3334248053752	0.182392436608594	0.995517635545774
PF3D7_1435400	12.7545962206032	0.199730016911659	0.497880265251283	0.401160742554948	0.68830178176499	0.995517635545774
PF3D7_1340300	5.52940101689031	0.91426594461734	0.581334437801959	1.57270219200191	0.11578779205574	0.995517635545774
PF3D7_1244000	10.346243117787	0.309671748837411	0.511387040091803	0.605552594336023	0.544811889792223	0.995517635545774
PF3D7_0609300	4.18253151995699	0.605756359896887	0.590433059989295	1.02595264551729	0.304913905701501	0.995517635545774
PF3D7_1419700	16.7858574514101	0.540165463553328	0.468738416866772	1.15238146504825	0.249164354055249	0.995517635545774
PF3D7_0529000	10.5466719388983	0.636203959890194	0.513959682792358	1.23784798923075	0.215772430545121	0.995517635545774
PF3D7_0514300	4.6800475344085	-0.330112435140452	0.578088662373612	-0.571041185594302	0.567971725030731	0.995517635545774
PF3D7_1465100	4.92702276477716	0.462689493179	0.583545002414616	0.792894277672611	0.427839421567538	0.995517635545774
PF3D7_0111800	14.3464089923494	-0.248955024091547	0.498093837384205	-0.499815507453298	0.617204990300613	0.995517635545774
PF3D7_1462700	10.188448146496	0.7087350658777	0.521504732448578	1.35901943315075	0.174140430808238	0.995517635545774
PF3D7_1341100	6.82533593223324	-0.721758356054984	0.556955411689726	-1.29589970921598	0.195010039447765	0.995517635545774
PF3D7_1410600	34.169307664467	0.181053576465612	0.374834710681936	0.483022439774111	0.629079803200393	0.995517635545774
PF3D7_1105300	11.2133800158977	0.707735371063766	0.522275032439735	1.35510090872558	0.17538540922374	0.995517635545774
PF3D7_0703600	11.2465058800779	0.329044490062353	0.521105741776271	0.631435165041078	0.527756029291851	0.995517635545774
PF3D7_1251100	16.6618208343223	-0.435564034076306	0.45126125590297	-0.965214780526075	0.334437245288525	0.995517635545774
PF3D7_0405900	12.919742792374	-0.837474653700877	0.497932708907323	-1.68190327471889	0.0925875975853648	0.995517635545774
PF3D7_1358800	34.5747282957944	-0.171436513264145	0.390011395287594	-0.439567959643149	0.660250050823091	0.995517635545774
PF3D7_0912900	17.1040016848142	-0.356328987414901	0.451762408029532	-0.788753072592105	0.430256341960393	0.995517635545774
PF3D7_0722400	13.619704001064	-0.441000411158059	0.480994759719308	-0.916850760318911	0.359220849235663	0.995517635545774
PF3D7_0102500	24.6295402872324	-0.48253821816896	0.513042212270373	-0.940542915627892	0.346939147192137	0.995517635545774
PF3D7_1331700	8.62163518261574	0.303592111335339	0.553615308475979	0.548380990711914	0.583430326217922	0.995517635545774
PF3D7_1134200	8.27457472654071	-0.567023317877966	0.560612992983925	-1.01143449219741	0.311808519546415	0.995517635545774
PF3D7_1305000	9.5656166211718	0.280401034289951	0.52223921173009	0.536920683073625	0.591322403467481	0.995517635545774
PF3D7_0724000	9.51510583569316	-0.223052380045016	0.545132318545223	-0.409171080959333	0.682414115421671	0.995517635545774
PF3D7_1321300	15.0406678576084	0.326445610150272	0.466172646499058	0.700267621023817	0.483760188667246	0.995517635545774
PF3D7_0609800	22.9279036082131	0.392083302074884	0.475576042279315	0.824438716878437	0.40969032347859	0.995517635545774
PF3D7_0624000	47.1054724060254	-0.209589763198886	0.342750719863767	-0.611493283755004	0.540873063324325	0.995517635545774
PF3D7_1476500	4.51650254893899	0.48183624523644	0.588324984794494	0.818996741069476	0.41278827294022	0.995517635545774
PF3D7_0932200	68.7835661900593	-0.221445053519151	0.400039421928963	-0.553558077979809	0.579881323106586	0.995517635545774
PF3D7_1463000	18.3845357253478	0.228924113014243	0.50936437956156	0.449430942170104	0.653120814476663	0.995517635545774
PF3D7_0606800	8.45021194102597	-0.557238410656897	0.55158655644188	-1.01024654090824	0.312377186458178	0.995517635545774
PF3D7_0919100	19.0622880336142	0.515938293235008	0.472994901556814	1.09079039020685	0.275365125936981	0.995517635545774
PF3D7_1229400	45.4409965692493	-0.321769796326349	0.348906180555362	-0.922224409479305	0.356411533340761	0.995517635545774
PF3D7_0829200	5.65235929225631	0.408575128965123	0.575860601433199	0.709503529062873	0.478012062275597	0.995517635545774
PF3D7_0729300	7.01342872839612	-0.826033591081307	0.559774944244235	-1.47565302730109	0.140037061953998	0.995517635545774
PF3D7_0815800	19.1028980381947	0.280711914357574	0.467540429609049	0.60040136976454	0.548238775152967	0.995517635545774
PF3D7_0623700	4.76715775773893	0.942979834850654	0.585166247766736	1.61147338632312	0.107076583338992	0.995517635545774
PF3D7_0828200	4.24460844334573	0.446589874078865	0.586959950853295	0.760852377457156	0.446745245728897	0.995517635545774
PF3D7_1467900	37.2609343764668	-0.156663952148803	0.382808037921571	-0.409249379922634	0.682356659590239	0.995517635545774
PF3D7_1318300	7.59101388166134	-0.387249806079885	0.57352540435189	-0.675209507968518	0.499542666742913	0.995517635545774
PF3D7_0106900	9.51234322971328	0.710145788542243	0.538668286025496	1.31833599074855	0.187391197892956	0.995517635545774
PF3D7_0310200	24.7661250177667	0.572278303527111	0.423485462060883	1.35135289117631	0.176582416684184	0.995517635545774
PF3D7_0412900	6.49501983567666	-0.960549793806713	0.568740644529205	-1.68890653946816	0.0912373418726071	0.995517635545774
PF3D7_0818900	264.435093214836	-0.220727424371679	0.269980603085878	-0.817567713564472	0.413604069608548	0.995517635545774
PF3D7_1226800	5.13599632921414	0.272235889120053	0.574824831273307	0.473597997701348	0.635786603592757	0.995517635545774
PF3D7_1215400	6.38243625455417	0.332153375808468	0.558913690858239	0.594283842463101	0.552322283586336	0.995517635545774
PF3D7_0831800	37.7835668129448	-0.580827935039773	0.515480279267231	-1.12677042827988	0.259839556481431	0.995517635545774
PF3D7_1016000	5.70086332687493	0.695419494023994	0.585113336761376	1.18852101008869	0.234628207351265	0.995517635545774
PF3D7_0625400	4.84592310683136	-0.746275724723552	0.59037647482257	-1.26406751716832	0.206205794326045	0.995517635545774
PF3D7_1466800	6.03082611816496	0.251396598613656	0.584284567579575	0.430263971638132	0.667003631940823	0.995517635545774
PF3D7_1110500	9.00230000565109	0.766369165802922	0.54813659412102	1.39813538089325	0.162072416966755	0.995517635545774
PF3D7_0202400	15.5079123349446	-0.474215948363132	0.501607803164954	-0.945391888585086	0.344458841788565	0.995517635545774
PF3D7_1455300	16.3116570893953	-0.721964032712259	0.512765101779326	-1.40798199839849	0.159136400519612	0.995517635545774
PF3D7_1240100	6.63534604838364	-0.630093017840087	0.583663805519418	-1.07954786964964	0.280343566143939	0.995517635545774
PF3D7_0622800	10.5208679150065	0.28120428361757	0.528763188490851	0.53181516742903	0.594854016745797	0.995517635545774
PF3D7_1420900	5.22333352429796	0.398048143917945	0.580741238862581	0.685413945628432	0.493082746417214	0.995517635545774
PF3D7_0527400	23.6795706990787	-0.288938911637285	0.433464250369968	-0.666580718918969	0.505039988340149	0.995517635545774
PF3D7_0931100	14.1331504025946	0.572850051714297	0.500360005154652	1.14487578106336	0.252260617791616	0.995517635545774
PF3D7_0416600	11.0017077493926	0.653085457924006	0.531645416408967	1.22842300105832	0.219288217827246	0.995517635545774
PF3D7_1475100	8.10708658806282	0.496067057489441	0.556971650772788	0.890650460936668	0.373116719052409	0.995517635545774
PF3D7_0710600	41.102170243558	-0.197867678009021	0.349978558875915	-0.565370857702102	0.571821542143732	0.995517635545774
PF3D7_0313000	4.86386166054532	0.454341198709728	0.582685209375837	0.779736968433456	0.435545714078925	0.995517635545774
PF3D7_1231000	9.4985098323418	-0.29269811064797	0.538607026184301	-0.543435373878347	0.586830075731155	0.995517635545774
PF3D7_1134100	5.12700619116275	0.356350270483454	0.5791587331728	0.615289470869693	0.538363569788909	0.995517635545774
PF3D7_0302900	30.0170827665401	0.625602980924576	0.390043611200771	1.60393085019037	0.108729295770064	0.995517635545774
PF3D7_0602000	5.93280094405373	-0.304328530622373	0.57475951103363	-0.529488463923073	0.596466644948459	0.995517635545774
PF3D7_0813500	5.60026459236421	0.431221618110061	0.575269789730737	0.749598928725078	0.453496296228896	0.995517635545774
PF3D7_1471200	20.9458522441048	0.325100018374466	0.445180899116856	0.730264975472657	0.46522823273268	0.995517635545774
PF3D7_0505100	25.5941192677532	0.23752272609844	0.43088578223958	0.551242895191128	0.581467178569861	0.995517635545774
PF3D7_1360900	25.8567001793595	0.263908090135608	0.405898990537763	0.650181686300735	0.515574869235405	0.995517635545774
PF3D7_0912700	6.29301070732187	-0.458786296841934	0.561490235067212	-0.817086866679018	0.413878787738092	0.995517635545774
PF3D7_1251600	7.44394699481397	0.341852591945242	0.546198789147427	0.625875777716108	0.531396423324461	0.995517635545774
PF3D7_1319300	6.75877648943292	-0.348624296234121	0.569764364774909	-0.611874518287658	0.540620782007067	0.995517635545774
PF3D7_1217900	7.9092154295915	0.357123063183031	0.548505031913481	0.65108438830031	0.514992013653306	0.995517635545774
PF3D7_1345100	6.08360248833534	-0.956102404106247	0.581161886797932	-1.64515675550259	0.0999374888718718	0.995517635545774
PF3D7_1313000	15.2031453627515	-0.444432023255484	0.466669740428966	-0.952348062779812	0.340920490186292	0.995517635545774
PF3D7_1037800	7.17469276128004	-0.238589992530219	0.560867674974893	-0.42539444360187	0.670549155876236	0.995517635545774
PF3D7_1423300	14.1396998058808	-0.741065707642539	0.568733989007423	-1.30300935404947	0.192571568097527	0.995517635545774
PF3D7_1211700	17.8472090394817	0.720398394998405	0.465339110344365	1.54811486716706	0.121594643237357	0.995517635545774
PF3D7_1032100	13.592722506539	0.194353575128721	0.481965939910093	0.403251680326157	0.686763084331513	0.995517635545774
PF3D7_1021100	5.02650844982506	0.638283220178296	0.591499907344687	1.07909267990189	0.280546414133988	0.995517635545774
PF3D7_0800700	5.070561488734	-0.898208825116189	0.585373060461678	-1.53442118502649	0.124926069099001	0.995517635545774
PF3D7_1452600	13.0766854373382	0.213080697927253	0.4960466812513	0.429557753293999	0.667517374054184	0.995517635545774
PF3D7_1238900	19.2467410400931	-0.224219378170485	0.495469441126705	-0.452539267932663	0.650880539119999	0.995517635545774
PF3D7_1328100	23.3229312169141	0.227882457574189	0.412829531192864	0.552001347664558	0.580947429942148	0.995517635545774
PF3D7_0303700	6.80696763177558	0.540771748821786	0.555662345056582	0.97320207790348	0.330452878310407	0.995517635545774
PF3D7_0422200	13.4087131335484	-0.243601341168728	0.529638134890853	-0.459939202110001	0.64555986065578	0.995517635545774
PF3D7_1104100	13.4755972043057	-0.36829936750176	0.483699779296429	-0.761421409034905	0.446405404040756	0.995517635545774
PF3D7_0102900	14.8878099804123	0.248006084729598	0.477636883834219	0.519235622548105	0.603596440573539	0.995517635545774
PF3D7_0501300	12.7654245039491	-0.858958351425156	0.52133182490887	-1.64762308837621	0.0994300395471137	0.995517635545774
PF3D7_1459000	13.3427884652058	0.566555521502757	0.517342610647799	1.09512634343677	0.273461289016712	0.995517635545774
PF3D7_0923900	30.2867464511128	-0.360947642045033	0.383675304290164	-0.940763291275212	0.346826176537142	0.995517635545774
PF3D7_0523100	4.48773143759631	0.250099209071873	0.58354718176589	0.428584383382745	0.668225712358304	0.995517635545774
PF3D7_1434600	7.56668641614081	0.242294087484498	0.5570163822891	0.434985568088272	0.663572902958317	0.995517635545774
PF3D7_1028700	17.2998282287661	-0.716351288421852	0.496419549232059	-1.44303601566461	0.149010325914212	0.995517635545774
PF3D7_0313600	4.50722901949597	0.265650196161532	0.582656537905328	0.455929314921195	0.648440808445836	0.995517635545774
PF3D7_1320800	8.26262168462814	0.233336903395666	0.540637678665595	0.431595711145382	0.666035276132881	0.995517635545774
PF3D7_1110100	6.83142536249036	0.543538799057502	0.565415514435805	0.961308604345367	0.336397022881884	0.995517635545774
PF3D7_1432400	5.12941909146868	0.647051833433718	0.584722899402232	1.10659567821819	0.268468776670631	0.995517635545774
PF3D7_1107800	30.1455820966896	-0.30204803632193	0.437123084293736	-0.690990815115499	0.489571313115518	0.995517635545774
PF3D7_0517400	16.8205633539885	0.392027726586072	0.473641263227037	0.827689133153409	0.407846574888933	0.995517635545774
PF3D7_0504000	13.8142213934134	0.706930005000949	0.493188303730332	1.43338761210259	0.151747096613806	0.995517635545774
PF3D7_0627500	24.1738492471467	-0.337737766797867	0.418833262432902	-0.806377613936461	0.420025150662689	0.995517635545774
PF3D7_1323500	23.5900166938105	0.321165385331554	0.451601096882365	0.711170516521603	0.476978576509521	0.995517635545774
PF3D7_0907600	5.47316313739726	-0.294266701635523	0.575170353817797	-0.511616601381269	0.608919364371138	0.995517635545774
PF3D7_1464100	7.79668260427739	0.315458482762298	0.55251983429624	0.57094508320069	0.568036869427221	0.995517635545774
PF3D7_1251300	7.46858587128217	-0.725829885662428	0.54312012590748	-1.33640763992987	0.181416070529866	0.995517635545774
PF3D7_1140300	6.26558077652413	-0.61245702679823	0.572562578957169	-1.06967700877993	0.284764718600947	0.995517635545774
PF3D7_1124800	13.879645039605	0.907828149047486	0.530946092097736	1.70983111573665	0.0872971073430744	0.995517635545774
PF3D7_0307200	45.4846464204598	-0.542755676085893	0.351238522057041	-1.54526238439686	0.122282810077179	0.995517635545774
PF3D7_1463200	9.33545646363752	-0.662645490637443	0.525561392032773	-1.2608336546078	0.207368785665926	0.995517635545774
PF3D7_1409400	16.6757817630945	0.353681977798347	0.513663767203661	0.688547646106634	0.491107976898847	0.995517635545774
PF3D7_0603400	11.2188465139338	0.827379861943576	0.524115901070837	1.57862003471585	0.114423236446137	0.995517635545774
PF3D7_0728600	13.6618907046298	-0.374867740172203	0.490248734571547	-0.76464805258461	0.44448114705047	0.995517635545774
PF3D7_0208200	6.84253183721895	0.243763488346446	0.554910806099008	0.43928408974424	0.660455701103833	0.995517635545774
PF3D7_0707900	8.59166529853648	-0.451125337930953	0.531818834669396	-0.848268824874159	0.396288275296908	0.995517635545774
PF3D7_1358700	43.6516503233108	0.153648720749162	0.355504355319158	0.432199264088403	0.66559659417613	0.995517635545774
PF3D7_1127000	15.5051680562594	0.286829549789106	0.510705072647002	0.56163442493817	0.574365120742967	0.995517635545774
PF3D7_1345200	7.17074224749055	-0.294149022230047	0.560960127876435	-0.524367076397345	0.60002325132039	0.995517635545774
PF3D7_0903100	4.57908489494988	0.388075102542108	0.58013071968182	0.668944238558772	0.503531048917079	0.995517635545774
PF3D7_1001700	18.4063323967267	-0.209903762360534	0.45214376025934	-0.464241201161635	0.642474945440605	0.995517635545774
PF3D7_0905200	7.3901011315204	-0.402476002769019	0.577193687004996	-0.697297998627513	0.485616320304548	0.995517635545774
PF3D7_0111000	7.69104970922504	-0.280103000271263	0.551354103535323	-0.508027415548777	0.61143411689618	0.995517635545774
PF3D7_0629100	4.55564565226372	0.666409236855574	0.588947424756821	1.13152585246593	0.257833828565049	0.995517635545774
PF3D7_0609100	14.238750498352	0.479283446245053	0.475555476304764	1.00783919043317	0.313531668337686	0.995517635545774
PF3D7_0501000	31.4222181631757	0.243385167909179	0.431722156761399	0.563754174061748	0.572921443028961	0.995517635545774
PF3D7_1130400	22.105174449868	-0.478943200820835	0.445565720857884	-1.07491034072075	0.282414871850485	0.995517635545774
PF3D7_1427900	51.9295781136178	0.215249273047963	0.368203125606718	0.584593823567574	0.558820861700305	0.995517635545774
PF3D7_0103100	12.3902409921143	-0.488066450069179	0.517810292208174	-0.942558418427424	0.345906817080598	0.995517635545774
PF3D7_0623000	8.70945334407258	0.363136526647676	0.538829334170152	0.673936075152517	0.500351955611963	0.995517635545774
PF3D7_0307700	20.1758706235961	0.180086129271414	0.436297462952374	0.412759973557473	0.679782479817922	0.995517635545774
PF3D7_1414400	50.7610345949098	0.346347204197537	0.337095398238556	1.02744566080499	0.304210660155497	0.995517635545774
PF3D7_1431500	7.8082515800933	-0.232777591224838	0.540595383600878	-0.430594855757587	0.666762982294674	0.995517635545774
PF3D7_1441200	23.9820548980723	0.243778179431154	0.420530966887774	0.579691386903764	0.56212275271379	0.995517635545774
PF3D7_1360800	24.5565280111515	0.41008467132004	0.44014505539068	0.931703460705796	0.351489797499074	0.995517635545774
PF3D7_0827300	7.62644279148502	0.9421191641259	0.549826466040253	1.71348456706871	0.086623430181215	0.995517635545774
PF3D7_0406200	63.1618019116293	0.564245805134332	0.372865524192173	1.51326890936563	0.130211366686877	0.995517635545774
PF3D7_1334100	8.71515888882869	0.326307451710999	0.528357177788147	0.617588755161829	0.536846458865509	0.995517635545774
PF3D7_0903400	14.3643534255162	0.753626282480045	0.498775548757543	1.51095274088182	0.130800492016638	0.995517635545774
PF3D7_0707600	6.18537179651917	0.580605433488519	0.576634377809181	1.00688660931807	0.313989267635459	0.995517635545774
PF3D7_1143900	5.02446174008682	-0.347048802910151	0.583896650640204	-0.594366832777059	0.552266787014764	0.995517635545774
PF3D7_0310500	10.5679949937918	0.510179649632992	0.538043739370241	0.948212221984288	0.343021426371416	0.995517635545774
PF3D7_1342100	11.0805389499894	0.863806162800909	0.526437642934805	1.64085181672293	0.100828179023577	0.995517635545774
PF3D7_0710700	4.57275013158691	0.544037514952396	0.588295380036102	0.924769313875981	0.355085915739472	0.995517635545774
PF3D7_1136900	10.4438771486402	0.403229504595735	0.558755929004618	0.721655885270082	0.470506070809894	0.995517635545774
PF3D7_0822600	14.5587072446043	-0.382773302877636	0.46298865023391	-0.826744462708216	0.408381914296093	0.995517635545774
PF3D7_0917000	7.74660157525103	0.326331337224956	0.544843782458604	0.598944775973009	0.549209711258184	0.995517635545774
PF3D7_1138400	11.94276455468	0.23074941380934	0.526979993923109	0.437871297715732	0.661479583110367	0.995517635545774
PF3D7_0719500	11.1922461796028	0.271828920654121	0.512756887539939	0.530132168401049	0.596020296962649	0.995517635545774
PF3D7_0920400	8.61279992578583	0.803508494702282	0.539727850231092	1.48872898509545	0.13655874916376	0.995517635545774
PF3D7_1472200	16.5591100038274	0.571200178511994	0.515648204447458	1.10773231359171	0.267977439618321	0.995517635545774
PF3D7_1346100	34.3823844083861	-0.396502589884953	0.408946029826311	-0.969571926284153	0.332259912041392	0.995517635545774
PF3D7_0808000	9.73306184046146	-0.339715643094365	0.546860800038835	-0.62121044893004	0.534461165347346	0.995517635545774
PF3D7_0926900	4.53320003219597	-0.770728315668232	0.581356229641905	-1.32574190551458	0.184925201752246	0.995517635545774
PF3D7_1014900	11.9546483231852	-0.451422849616239	0.534722563711038	-0.844218815984332	0.398547141997675	0.995517635545774
PF3D7_1306800	5.1136195100672	-0.365098569058252	0.585456622042025	-0.623613356331709	0.532881536941432	0.995517635545774
PF3D7_1123500	13.8343322188043	0.564084544004183	0.480041526959552	1.1750744723627	0.239964922589062	0.995517635545774
PF3D7_0315000	4.81152091657145	0.280607786300218	0.579143239862309	0.484522251122075	0.628015276735234	0.995517635545774
PF3D7_1010300	41.9875970248771	-0.420419819912709	0.456868551604195	-0.920220528282141	0.357457528881063	0.995517635545774
PF3D7_0614500	44.0643052204069	0.289338703396967	0.391020813164678	0.73995729550875	0.459325906909034	0.995517635545774
PF3D7_0820500	6.1704768430463	-0.431555968989173	0.558551490986602	-0.772634172414239	0.439738914658811	0.995517635545774
PF3D7_1442900	21.725896000107	0.401545826445069	0.444117262654171	0.90414370305112	0.36591920723713	0.995517635545774
PF3D7_1336900	5.47684276564942	-0.434242735122147	0.57803906043706	-0.751234241495397	0.452511696260782	0.995517635545774
PF3D7_0605200	4.56815333543365	-0.561256909471858	0.58448721131805	-0.960255243577006	0.336926769468945	0.995517635545774
PF3D7_1417700	16.1387794490515	-0.315942064689501	0.481476707506233	-0.656193871404279	0.511699391634533	0.995517635545774
PF3D7_0626700	6.18891332295693	0.52043392457662	0.575255694118276	0.904700170546449	0.365624250737961	0.995517635545774
PF3D7_1141300	6.48457879561879	0.38626235103564	0.583163185941763	0.662357227526042	0.507742308856412	0.995517635545774
PF3D7_1212600	13.459182234109	0.711858613414961	0.517020682896212	1.37684745884308	0.168559414326442	0.995517635545774
PF3D7_0606200	13.5464474029922	-0.759269468811073	0.479973378512517	-1.58189912774771	0.113672600110316	0.995517635545774
PF3D7_1439500	13.5165398430469	-0.247608439232597	0.527865550664624	-0.469074822027765	0.63901615520688	0.995517635545774
PF3D7_0804600	6.68637729176098	-0.511978188370571	0.558064751129517	-0.917417176652589	0.358924075306755	0.995517635545774
PF3D7_1422800	5.23899675650207	-0.292050987297925	0.586360956065611	-0.498073727926124	0.618432077210016	0.995517635545774
PF3D7_1444800	108.54808500157	-0.230299114686442	0.319352719853629	-0.721143426591125	0.470821274792052	0.995517635545774
PF3D7_1453200	6.64293779176576	-0.426697760547333	0.549899927950518	-0.775955294516294	0.437775382438475	0.995517635545774
PF3D7_0803100	7.99730288133968	-0.460467795136939	0.533964507278429	-0.862356559022816	0.388491337805753	0.995517635545774
PF3D7_0528400	11.7621984120817	0.880886805358394	0.532264807089299	1.6549784874479	0.0979288617395832	0.995517635545774
PF3D7_1318000	7.27862803080025	-0.390050542247895	0.568323237511226	-0.686318131132532	0.492512517972348	0.995517635545774
PF3D7_1022200	11.1545035178987	-0.506567984520976	0.504953470602133	-1.00319735186079	0.31576565044708	0.995517635545774
PF3D7_1340700	5.40976907044859	0.878287611858665	0.574998191827231	1.5274615196052	0.126646288856744	0.995517635545774
PF3D7_1244900	5.27019682550919	0.59141509893663	0.585362592012373	1.01033975694185	0.312332539674739	0.995517635545774
PF3D7_1306200	24.5223724305964	0.577906796379723	0.424841611257916	1.3602876485394	0.173738915438236	0.995517635545774
PF3D7_1228500	16.0526696251235	-0.3309636489873	0.495086832591923	-0.668496165116347	0.503816929002605	0.995517635545774
PF3D7_0904900	26.0051061998005	0.223157650984231	0.404502588322815	0.551684111366276	0.581164797636154	0.995517635545774
PF3D7_1236000	5.61566805352003	-0.340555410721428	0.573505765655285	-0.593813403658307	0.552636923119521	0.995517635545774
PF3D7_0716400	6.58203057129609	-0.439498138967474	0.573129294346766	-0.766839425767618	0.443176992210082	0.995517635545774
PF3D7_1144300	38.5199416286363	-0.236716356124461	0.376639915113729	-0.628495139855219	0.529679629486117	0.995517635545774
PF3D7_0525500	5.76466880974098	-0.441674716032645	0.579257994404365	-0.762483591593427	0.445771432598934	0.995517635545774
PF3D7_1443400	6.45232434098718	-0.384897384817023	0.576253231945774	-0.66793097804828	0.504177652136382	0.995517635545774
PF3D7_1369500	6.27937450953073	-0.251767876940139	0.568577969524418	-0.442802729677916	0.657908428754665	0.995517635545774
PF3D7_1237900	9.83419290419625	-0.581489407120364	0.518127463505419	-1.12229026268221	0.261739044962008	0.995517635545774
PF3D7_1340100	5.0546221776519	-0.564055068564596	0.589618599091292	-0.95664395498023	0.338746995063804	0.995517635545774
PF3D7_0716900	11.0805253586672	0.392870027081538	0.524422418791281	0.749148039832178	0.453767982853348	0.995517635545774
PF3D7_1346600	4.8881925537284	-0.420203488760008	0.578470598881741	-0.726404227928465	0.467591000084463	0.995517635545774
PF3D7_1250700	15.0304342628632	-0.231727326822872	0.484062406292413	-0.478713743952448	0.632142286909999	0.995517635545774
PF3D7_1132800	34.1008021790561	0.340083760147009	0.395055398541035	0.86085081080517	0.389320216135038	0.995517635545774
PF3D7_0924600	4.51323791315127	0.313001005734064	0.588857133502167	0.531539804693412	0.59504476555694	0.995517635545774
PF3D7_1356200	5.8762843424032	-0.853395109423797	0.571395626173379	-1.4935275496226	0.135299148316784	0.995517635545774
PF3D7_1440700	9.59969560895819	0.287806204693082	0.537308284702324	0.535644457543644	0.59220429696475	0.995517635545774
PF3D7_0718500	16.0356611608974	0.473803459599645	0.46017042045258	1.02962606578158	0.303185574396499	0.995517635545774
PF3D7_0935600	5.11292000921123	-0.763003273448981	0.57680434615181	-1.32281124186981	0.185898157763294	0.995517635545774
PF3D7_1141700	5.89253249572177	0.903366292291822	0.574678209678456	1.57195153231453	0.115961792039222	0.995517635545774
PF3D7_1419500	6.22093260932731	0.506889104994154	0.567618327916431	0.893010461545177	0.371851570319175	0.995517635545774
PF3D7_1237700	61.1854345914654	0.452780246268313	0.333402166855664	1.35806029858327	0.174444551544664	0.995517635545774
PF3D7_1244600	14.1506110577104	-0.281237173589364	0.481926363719577	-0.583568766437128	0.559510478972667	0.995517635545774
PF3D7_1133400	10.5783367606734	-0.45952440593757	0.541047610416148	-0.849323418292386	0.395701353378781	0.995517635545774
PF3D7_1466400	22.795287352101	0.605857684918339	0.456350389608168	1.327615136778	0.184305281418229	0.995517635545774
PF3D7_1360300	5.86835489940774	0.595249112507136	0.567182442123794	1.04948437803936	0.293955241486796	0.995517635545774
PF3D7_0421100	5.09496385007203	-0.303626065943243	0.588080968053914	-0.516299765571408	0.605645059942895	0.995517635545774
PF3D7_0512800	6.21620134357251	-0.419962321460329	0.563624032600955	-0.745110742567753	0.456204775432552	0.995517635545774
PF3D7_0408900	4.56295885408401	-0.355274361416744	0.588130540356447	-0.604073988746484	0.545794452124427	0.995517635545774
PF3D7_1026800	87.8289568095082	-0.493191287213111	0.326152507487286	-1.51214930405628	0.130495884480097	0.995517635545774
PF3D7_1110700	4.90320840961439	0.497333561203121	0.585193397142462	0.849861880929678	0.39540188078101	0.995517635545774
PF3D7_1458500	5.93090655862846	0.488354082397482	0.564249627993032	0.865492962989623	0.386768276638772	0.995517635545774
PF3D7_1008900	20.1280991661766	0.528814843492554	0.435771966899273	1.21351276277666	0.224933837802478	0.995517635545774
PF3D7_1253000	10.5613325367911	-0.232286886721318	0.530347747592928	-0.43798976761114	0.661393700965121	0.995517635545774
PF3D7_0314700	5.61430792186592	0.440558552084959	0.576268174268907	0.764502659970563	0.4445677521479	0.995517635545774
PF3D7_1331800	37.2673007915986	-0.358301782264093	0.418863680302025	-0.855413823432332	0.392322093560852	0.995517635545774
PF3D7_1329100	18.7022378109963	0.378722957271604	0.458308693347344	0.826349058547264	0.408606111783942	0.995517635545774
PF3D7_1222100	6.07783232624817	-0.698526122286013	0.566260308421098	-1.23357775902343	0.217360284884234	0.995517635545774
PF3D7_0804400	8.92295765095473	0.374576662967215	0.536558085128156	0.698110182940861	0.485108290337858	0.995517635545774
PF3D7_0311800	4.20321025945942	-0.587931616844309	0.585631965485291	-1.00392678592452	0.315413904486282	0.995517635545774
PF3D7_1449700	5.72846390687331	0.345988977376399	0.580346758031112	0.596176290447805	0.551057462907865	0.995517635545774
PF3D7_1357700	4.95932705951183	-0.41844503573041	0.575656293954932	-0.726900826282237	0.467286710979395	0.995517635545774
PF3D7_1465900	31.4652583800622	-0.610238905991003	0.405570088308177	-1.50464475458877	0.132415433500292	0.995517635545774
PF3D7_1148640	4595.83500679281	0.29842441442231	0.375989732963648	0.793703626080562	0.427367988793483	0.995517635545774
PF3D7_1129500	5.11605144128182	-0.442784816885747	0.574789497931067	-0.770342566243006	0.441096712785616	0.995517635545774
PF3D7_1479000	5.55626924107204	-0.814129599498676	0.580215744804965	-1.40314978831252	0.160572176985404	0.995517635545774
PF3D7_0404600	15.5328694707409	-0.361742953287885	0.525202455806399	-0.688768586834695	0.490968906800269	0.995517635545774
PF3D7_0913700	10.2900903534368	0.844982791857679	0.532358040954068	1.58724528767019	0.11245710141962	0.995517635545774
PF3D7_1116700	44.3315994359866	-0.237472353125442	0.374156322939981	-0.634687531830207	0.525632226987681	0.995517635545774
PF3D7_0519300	4.4075164742053	-0.396559451362209	0.591093885107889	-0.670890803226339	0.502290095550861	0.995517635545774
PF3D7_1108600	73.439382877495	0.132186100977522	0.324062256580894	0.407903414523455	0.683344585842754	0.995517635545774
PF3D7_0316000	4.34095435327727	-0.735203324405918	0.584535956265663	-1.25775551790313	0.208480187240988	0.995517635545774
PF3D7_0217600	7.41600238163708	0.728545538726765	0.564706836883981	1.29013054410114	0.197005336417275	0.995517635545774
PF3D7_1117500	5.46298779379771	-0.751716906415366	0.579760684902631	-1.29659862420926	0.194769326091376	0.995517635545774
PF3D7_0903900	39.8662053827655	-0.470165299362178	0.408530229784873	-1.15087027858321	0.249785606780297	0.995517635545774
PF3D7_1450500	8.3224555018048	0.969646099905355	0.567472163605466	1.70871130267369	0.0875044394225968	0.995517635545774
PF3D7_0302200	38.2610194199352	-0.756972313177182	0.518747853882815	-1.45922977321499	0.144501876776492	0.995517635545774
PF3D7_0810600	20.8111856145096	0.385341682553566	0.435210483616388	0.885414522535311	0.375933102611878	0.995517635545774
PF3D7_0510000	4.2003314763245	-0.524555517438024	0.590985877648968	-0.88759399721155	0.374759183784427	0.995517635545774
PF3D7_1438400	13.8899153066206	0.39187160248028	0.515750978675288	0.759807772903904	0.447369496017451	0.995517635545774
PF3D7_1017400	9.3319420715766	-0.237212409862842	0.526100916592976	-0.450887657446078	0.652070519589802	0.995517635545774
PF3D7_0320000	18.4482739586759	-0.354567556599968	0.471427834914586	-0.75211417387819	0.451982400884731	0.995517635545774
PF3D7_1021700	58.0253454626187	-0.275620112017218	0.414954740667199	-0.66421728686375	0.506551250885843	0.995517635545774
PF3D7_1121300	20.3426134440174	0.870097247699109	0.522711271275826	1.66458482055569	0.0959956158368504	0.995517635545774
PF3D7_0413100	4.35536521903061	-0.959844400044352	0.58774585309443	-1.63309429575871	0.1024491661248	0.995517635545774
PF3D7_0203000	18.2237213625606	-0.19845219147923	0.443264299206579	-0.447706237191783	0.654365219679863	0.995517635545774
PF3D7_1201000	35.793062205623	0.679839089592522	0.420447960968164	1.61693991338919	0.105891251697681	0.995517635545774
PF3D7_0718100	8.01551252514127	0.4644086134949	0.549414046391596	0.845279833205961	0.397954618048223	0.995517635545774
PF3D7_0629400	5.08833916935393	0.761005783698028	0.58881947495074	1.29242631412912	0.196209548755604	0.995517635545774
PF3D7_1327400	7.6996568872861	0.321194123083966	0.557636219075623	0.575992218755806	0.564620441109768	0.995517635545774
PF3D7_1463700	6.55847644129398	0.233953254336748	0.561537518619953	0.416629782657652	0.676949221531231	0.995517635545774
PF3D7_1321900	12.7433766550388	0.315908629467644	0.498859863137014	0.633261267966307	0.526563041896449	0.995517635545774
PF3D7_1234800	10.4886929358217	-0.448781081565396	0.507306511722563	-0.884634971551137	0.376353538639195	0.995517635545774
PF3D7_0219200	47.7444360440666	-0.313297543455387	0.33705297945071	-0.929520172068984	0.352619576154552	0.995517635545774
PF3D7_1229500	8.32470947294386	-0.329906545655646	0.554854011044113	-0.594582609279213	0.552122507613114	0.995517635545774
PF3D7_1457300	12.5109511831924	0.251180301688573	0.489892191655585	0.512725668967516	0.608143231366982	0.995517635545774
PF3D7_0616900	5.09891762085239	0.335549191853585	0.574050963120714	0.584528575702475	0.558864745537369	0.995517635545774
PF3D7_0721600	19.6727338316254	-0.680547984785508	0.468036939554116	-1.45404759170044	0.145933112031946	0.995517635545774
PF3D7_0405000	5.4746823786348	0.335459912934379	0.582837430903086	0.575563433554012	0.564910303034535	0.995517635545774
PF3D7_0420100	5.67458724527893	0.781663407777027	0.577369397453932	1.35383588258052	0.175788743002614	0.995517635545774
PF3D7_1453900	5.27245084491573	-0.280665323357316	0.575505769584769	-0.487684638782715	0.625773234011339	0.995517635545774
PF3D7_1208400	6.48206052723994	-0.479169747783488	0.560469869355871	-0.854942921970421	0.392582747202377	0.995517635545774
PF3D7_0611600	9.849154747283	0.615702965737871	0.528090519476315	1.1659042210196	0.243653172194203	0.995517635545774
PF3D7_1415300	5.63361940760163	0.476487659356488	0.581521696590734	0.819380707805013	0.412569238389144	0.995517635545774
PF3D7_1476800	4.90289565298278	0.349522735650668	0.579164163531202	0.603495101491786	0.546179373265316	0.995517635545774
PF3D7_0713900	35.0136978692098	0.635616209551958	0.389867194056585	1.63034032932688	0.103029588440467	0.995517635545774
PF3D7_1013300	6.62600939274323	0.797768102822169	0.577124125336596	1.38231632988291	0.16687459408712	0.995517635545774
PF3D7_1460400	6.16496587558767	-0.482775139135613	0.561102139910545	-0.8604050934694	0.389565779098339	0.995517635545774
PF3D7_0930500	9.86164263272346	-0.239106498751303	0.544741542693712	-0.438935678687064	0.660708143447204	0.995517635545774
PF3D7_1426200	10.8480634553131	-0.212205405403789	0.523263104792759	-0.405542457437036	0.685078816278495	0.995517635545774
PF3D7_0605500	4.49226555943655	-0.476718910318392	0.582905847823365	-0.81783175121422	0.41345326516436	0.995517635545774
PF3D7_0801800	30.7234112262677	0.469090222297377	0.39141172411599	1.19845725969712	0.230739052460853	0.995517635545774
PF3D7_0518000	5.23441540713306	0.739518074853135	0.584468309322686	1.26528344318639	0.205769739549616	0.995517635545774
PF3D7_0608800	159.486767284135	0.415109342977384	0.302782769710946	1.37098073108213	0.170380962851492	0.995517635545774
PF3D7_1429800	11.9238027985729	0.242857843016501	0.513405449955508	0.473033239202168	0.636189465162846	0.995517635545774
PF3D7_0705300	4.80475376004818	0.74786025516568	0.587542048518116	1.27286252456639	0.203066829491819	0.995517635545774
PF3D7_1319100	4.30789029021259	0.594690708671375	0.589943593095364	1.00804672791021	0.313432030092517	0.995517635545774
PF3D7_0926200	10.4343599904409	-0.445562288563336	0.511259027443371	-0.871500090260388	0.383481156603343	0.995517635545774
PF3D7_1311200	6.83176416821003	-0.5386663050956	0.566238827639	-0.951305842698271	0.341449141874086	0.995517635545774
PF3D7_0931400	12.3927051012528	0.429901981103179	0.510951782960274	0.841374852657288	0.400137968851261	0.995517635545774
PF3D7_0910800	4.7349884193384	-0.350135190049311	0.58589287626748	-0.597609570336305	0.550100476936566	0.995517635545774
PF3D7_1006500	8.63678899251979	-0.609589649998646	0.544782830469899	-1.11895899779523	0.263157631616888	0.995517635545774
PF3D7_1240600	4.27957886618517	0.285913663527454	0.59143683898004	0.483422141949299	0.628796029679375	0.995517635545774
PF3D7_1211400	22.6495438828684	-0.320605925148975	0.501673536024426	-0.639072827499844	0.522775555760111	0.995517635545774
PF3D7_0211200	6.40003094820468	0.514390996182026	0.575499733784849	0.89381621916498	0.371420229767602	0.995517635545774
PF3D7_0513800	14.6475814075701	0.263815354249526	0.481173664431988	0.548274716075646	0.583503285651429	0.995517635545774
PF3D7_0420600	5.29479074673144	0.476380074189332	0.578469740339825	0.82351770709645	0.410213651911803	0.995517635545774
PF3D7_0204200	13.265997800657	-0.662145148248745	0.489645129989825	-1.35229599498417	0.176280645103844	0.995517635545774
PF3D7_0323200	5.61235411911851	0.255393951180615	0.573575785468088	0.445266271086028	0.65612733964406	0.995517635545774
PF3D7_1208700	6.68127482583059	0.441990396374203	0.565675853888497	0.781349236202905	0.434597119159942	0.995517635545774
PF3D7_0908400	8.77426342082434	0.607457023702551	0.549994638565453	1.10447808234454	0.269385806035364	0.995517635545774
PF3D7_1204700	6.11708233373078	0.791184331286158	0.574010462111778	1.37834479248932	0.168096859809411	0.995517635545774
PF3D7_0801900	11.3939638678545	-0.238495127177464	0.522260946753602	-0.45665893392941	0.647916212175879	0.995517635545774
PF3D7_1023000	8.00254183211179	-0.593418652079604	0.551154894665	-1.07668217741274	0.281622277273188	0.995517635545774
PF3D7_1149000	77.2417780620558	-0.366712751171781	0.36369035493733	-1.00831035575571	0.313305493049713	0.995517635545774
PF3D7_0406100	17.041206173816	0.248668511050075	0.478734436603444	0.519428919328104	0.603461668855394	0.995517635545774
PF3D7_1405600	16.7632806745765	-0.275918915548574	0.460192960245834	-0.599572221620206	0.548791364642977	0.995517635545774
PF3D7_0813200	8.90892788864145	0.594638603460782	0.533851044939423	1.11386614130962	0.265336616829548	0.995517635545774
PF3D7_0911600	8.13213439603789	0.701092740260222	0.539997812719681	1.2983251482616	0.194175628248966	0.995517635545774
PF3D7_1449800	4.58228971846412	-0.486744955982594	0.58918542401347	-0.826132039497749	0.408729194554421	0.995517635545774
PF3D7_0803900	5.57235568647897	-0.623961054858115	0.580062384267664	-1.07567922309921	0.282070742632294	0.995517635545774
PF3D7_1464700	5.1553427968404	-0.29036774886751	0.576762718036778	-0.503444033026063	0.614652119803832	0.995517635545774
PF3D7_0814200	163.268528211864	0.126588407769779	0.29629636005684	0.427235784285351	0.669207599812021	0.995517635545774
PF3D7_1029100	4.28598073460589	0.384155312476517	0.587664078727209	0.653698816011588	0.513305866209506	0.995517635545774
PF3D7_0413700	23.233146243567	0.549165874378749	0.488554402380483	1.12406289187639	0.260986346263015	0.995517635545774
PF3D7_1409800	10.2231932811141	0.422156797039637	0.528810143632251	0.798314484173769	0.424688014796298	0.995517635545774
PF3D7_0606700	9.9772988280597	0.346979481225974	0.524607625506544	0.661407620392368	0.508350940244408	0.995517635545774
PF3D7_1230600	6.24684690696662	-0.377860600311432	0.555555883054151	-0.680148679614651	0.496410323843258	0.995517635545774
PF3D7_1368400	5.40514916373014	0.369580944982305	0.577288927404199	0.640200993710617	0.522041936849455	0.995517635545774
PF3D7_0613100	9.33656176376029	-0.312731620769186	0.533738812430632	-0.585926324797357	0.557925026022856	0.995517635545774
PF3D7_0719900	13.6680635676828	0.291889255839051	0.487847670618641	0.59832048694402	0.549626109274078	0.995517635545774
PF3D7_0824400	25.5295462573295	0.248319490097188	0.422334153349277	0.587969237457865	0.556552941341098	0.995517635545774
PF3D7_1144200	26.5021445607147	-0.200044146169519	0.413631412882083	-0.483628999005807	0.628649190471551	0.995517635545774
PF3D7_1116800	26.6515448407101	0.179962276304435	0.427755702049947	0.420712746649539	0.67396485217421	0.995517635545774
PF3D7_0721400	9.92716803991478	-0.408356009102718	0.511055584357929	-0.79904421671815	0.424264773534059	0.995517635545774
PF3D7_1366800	11.6858145172616	0.353692825254909	0.528377228145751	0.669394528027133	0.503243841273801	0.995517635545774
PF3D7_1243500	9.51640269570014	-0.321979425330432	0.538963697613345	-0.597404661494328	0.550237242258225	0.995517635545774
PF3D7_1446300	10.2372325868041	-0.25564875376922	0.50876980375496	-0.502484133064526	0.615327010844466	0.995517635545774
PF3D7_1148100	6.33185802473223	-0.545307704979293	0.569184447131847	-0.958050958221241	0.338037063252688	0.995517635545774
PF3D7_0409800	10.0352718960177	0.786602416165043	0.536598610711953	1.46590468268523	0.142674256079066	0.995517635545774
PF3D7_1108400	37.1907866204753	0.271244677480035	0.364600892003204	0.743949571789998	0.456906983751835	0.995517635545774
PF3D7_0604900	4.35363620544093	-0.324923451917943	0.589442892927115	-0.551238221406666	0.581470382072198	0.995517635545774
PF3D7_0818400	6.51155448958139	-0.354947879975677	0.57447142748428	-0.617868640621627	0.536661932063631	0.995517635545774
PF3D7_1003400	5.18155084433636	-0.337642142920852	0.587121569533262	-0.575080461086218	0.56523688162279	0.995517635545774
PF3D7_0615800	4.4096615655482	0.999910040671611	0.589727306307911	1.69554644998842	0.0899718064347402	0.995517635545774
PF3D7_0927300	4.25343037165571	0.597936787120761	0.590840564988944	1.01201038410751	0.31153308845132	0.995517635545774
PF3D7_1437100	5.74301754385427	-0.265343839918166	0.568425543671495	-0.466804919082795	0.640639456147057	0.995517635545774
PF3D7_0304400	26.897363922108	0.341540657439581	0.429858961291927	0.794541205825026	0.426880430476807	0.995517635545774
PF3D7_0630300	11.7905823009538	0.298557384461008	0.492153301017469	0.606634932334652	0.544093212387181	0.995517635545774
PF3D7_1233400	6.06641939342585	0.929101592600117	0.577509175545475	1.60880836520485	0.107658251176927	0.995517635545774
PF3D7_0321100	9.87898581948105	-0.406125254656693	0.51578760266319	-0.78738855404769	0.431054445026984	0.995517635545774
PF3D7_0107500	49.2479413703898	0.299684138720567	0.364309912719444	0.822607698164266	0.410731119527616	0.995517635545774
PF3D7_0608600	4.97087893985972	-0.320031562173996	0.58784559398839	-0.544414324861499	0.586156390442321	0.995517635545774
PF3D7_0933500	6.80659861419564	0.948388993731353	0.5649791095556	1.67862665661627	0.0932248280510844	0.995517635545774
PF3D7_1006600	7.24140668685525	-0.60955282481832	0.552308595971293	-1.10364537011479	0.269747001991561	0.995517635545774
PF3D7_0532600	6.33680806454759	0.628299784945026	0.583258190839253	1.07722410900216	0.281380157051251	0.995517635545774
PF3D7_1472800	6.57382855688469	0.898848128049706	0.575326669607355	1.56232654513156	0.118211081637797	0.995517635545774
PF3D7_1317600	4.26045120433059	-0.568647404487876	0.590699452481274	-0.962667905140647	0.335714208082055	0.995517635545774
PF3D7_1246400	21.6632895756915	-0.350546995148908	0.501508470605443	-0.698985193063065	0.484561284404563	0.995517635545774
PF3D7_1336200	13.4780334536663	0.723694351735953	0.490522975080675	1.4753526103786	0.140117768978738	0.995517635545774
PF3D7_0707200	11.35048550751	0.935669686266059	0.548830540077509	1.70484260247966	0.0882237835911494	0.995517635545774
PF3D7_0728100	13.8157351053773	0.375203402097451	0.480461617883166	0.780922737908877	0.434847937842101	0.995517635545774
PF3D7_0405200	9.26544739499188	-0.245708941528724	0.527542899564268	-0.465761062714844	0.641386538839512	0.995517635545774
PF3D7_1475200	4.79156648526236	0.447729346985048	0.579764803951866	0.772260309582745	0.439960267997944	0.995517635545774
PF3D7_0216600	16.0277450608471	-0.468213647222307	0.484732990129135	-0.965920737306477	0.334083844738778	0.995517635545774
PF3D7_0918000	87.7837260629141	-0.239100720460161	0.311817240103967	-0.766797629215238	0.443201846172107	0.995517635545774
PF3D7_1130700	9.66893247232549	0.477668027054013	0.52385439690689	0.911833574127495	0.361856333463795	0.995517635545774
PF3D7_1310300	4.35764081182918	-0.701565817913372	0.587048972765178	-1.19507204758197	0.232058882015922	0.995517635545774
PF3D7_0502100	5.91677328479253	-0.917217499522016	0.573999158415718	-1.59794223750015	0.110055832860383	0.995517635545774
PF3D7_1304500	16.6690696890121	-0.482057882516622	0.497322407912643	-0.969306580292471	0.332392247098462	0.995517635545774
PF3D7_0316200	13.6930464398588	-0.315756883500293	0.474449734015707	-0.665522311136632	0.505716478077139	0.995517635545774
PF3D7_0704000	8.22466236136813	-0.253261746984851	0.563451715235614	-0.449482608956025	0.653083550835367	0.995517635545774
PF3D7_0817800	12.4065315132442	-0.28664827049148	0.515704047075982	-0.5558387065542	0.578321122449044	0.995517635545774
PF3D7_0903000	6.64718860201388	-0.836897212704098	0.559444832967121	-1.49594234031166	0.134668681476991	0.995517635545774
PF3D7_1425700	10.0213482030447	0.506983279434582	0.517779311883098	0.979149355332	0.327506188026321	0.995517635545774
PF3D7_1237500	10.3110004869509	0.751803189010725	0.527266998724497	1.42584912545143	0.153911897161103	0.995517635545774
PF3D7_0904600	12.335401370558	0.273979004857132	0.488219289737803	0.561180212695553	0.574674690711519	0.995517635545774
PF3D7_1438700	10.6933878543663	0.236773388005519	0.51196418430621	0.462480375119176	0.643736872515572	0.995517635545774
PF3D7_0423400	6.3810997443316	-0.706542270525728	0.584664995016283	-1.20845659745039	0.226871680905215	0.995517635545774
PF3D7_1244300	13.3156259267294	-0.441603421641874	0.520353600663784	-0.848660259251684	0.396070365655195	0.995517635545774
PF3D7_1337100	4.93287567019554	0.47497579149276	0.58790223252822	0.807916291540806	0.419138772092601	0.995517635545774
PF3D7_1352300	5.47204192771231	0.869409048887099	0.589258086165148	1.47542998441507	0.140096979018578	0.995517635545774
PF3D7_0208100	10.4876576466593	0.501073879366788	0.507708906624935	0.986931434190797	0.323676252911999	0.995517635545774
PF3D7_0710100	8.95637199502492	0.261496986395456	0.525527067562697	0.497589948331746	0.618773089933881	0.995517635545774
PF3D7_0607900	5.00130729032108	-0.506814904809706	0.580651903679067	-0.872837756319195	0.382751516837193	0.995517635545774
PF3D7_1226900	16.6229682118816	0.717914497124801	0.46008922759764	1.56038101755479	0.118669867938497	0.995517635545774
PF3D7_0410800	14.5339918794797	0.293754363728894	0.486597053177155	0.603691209823145	0.546048959329294	0.995517635545774
PF3D7_1132300	8.64823726956376	-0.420136731276205	0.533242154409194	-0.787891069380468	0.430760425389486	0.995517635545774
PF3D7_0922600	11.3379671026348	0.20891174255847	0.511550700268975	0.408389124379311	0.682988016620887	0.995517635545774
PF3D7_1143800	8.02660883621024	-0.383830357561158	0.53371268062867	-0.719170391659119	0.472035940029749	0.995517635545774
PF3D7_0107700	4.85481348588304	0.327403160553033	0.577714143610541	0.56672173283981	0.570903253008597	0.995517635545774
PF3D7_1436200	13.8870262449992	-0.28001843192026	0.537406373917679	-0.521055286112318	0.602328258383032	0.995517635545774
PF3D7_1114200	8.52229465258891	-0.610339484858551	0.528989694070649	-1.15378331884295	0.248589014756345	0.995517635545774
PF3D7_0407400	5.90182757551129	-0.508249333030361	0.567268698061603	-0.895958713687332	0.370274814059107	0.995517635545774
PF3D7_1420700	53.7746104839653	0.150253127714831	0.355883251330403	0.422197805468894	0.672880643186647	0.995517635545774
PF3D7_1419400	10.2043003950128	0.424613513452247	0.519561282550049	0.817253955814815	0.413783313894225	0.995517635545774
PF3D7_1435600	15.3073287715723	-0.377730758823995	0.503558326481693	-0.75012315149897	0.45318053712684	0.995517635545774
PF3D7_1305100	6.19712105704304	0.387434649008129	0.58198196266329	0.665715905068835	0.505592705344784	0.995517635545774
PF3D7_1344800	9.69779033020887	-0.528329382798518	0.536916373391248	-0.984006837901974	0.325112150826999	0.995517635545774
PF3D7_1017300	4.58680729956577	-0.93975184822752	0.585774421694566	-1.60428966070069	0.108650219073608	0.995517635545774
PF3D7_1137500	10.741520857074	-0.322354114936208	0.525267570927455	-0.613695062817285	0.539416851520525	0.995517635545774
PF3D7_1028600	13.5971004497413	-0.220876724854761	0.497471063248884	-0.443999141200817	0.657043204815455	0.995517635545774
PF3D7_0933600	17.7757522239814	-0.301313619455019	0.44279334413039	-0.680483623905356	0.496198287469716	0.995517635545774
PF3D7_0707420	9.92101992744518	-0.53590146812839	0.51924174247592	-1.03208471948544	0.302032431499963	0.995517635545774
PF3D7_1025400	7.15899606022479	-0.919881619530441	0.574606495760711	-1.60088969811006	0.109401351725809	0.995517635545774
PF3D7_1149400	15.698792509182	0.28577745292188	0.493795677613677	0.578736238241152	0.562767160218823	0.995517635545774
PF3D7_0827000	7.07367977294613	-0.513768236244615	0.570807072417454	-0.900073354152268	0.368081215066235	0.995517635545774
PF3D7_1140100	31.3730860348861	-0.415778262437163	0.4137986704553	-1.00478394959482	0.315000894126804	0.995517635545774
PF3D7_1367400	4.64899142253485	-0.828643973322786	0.578775927473801	-1.43171810365298	0.152224513194615	0.995517635545774
PF3D7_1223600	10.965957343852	0.383393133962962	0.513895070196181	0.746053340843687	0.455635193565028	0.995517635545774
PF3D7_1312800	17.2887546780832	-0.379058491276469	0.456580925229313	-0.830210966623475	0.406419515898647	0.995517635545774
PF3D7_0515400	7.41126823411338	-1.00577530140541	0.586041982304978	-1.71621715128593	0.0861223051883609	0.995517635545774
PF3D7_0505400	5.4766484028867	0.26243635728519	0.585537180682698	0.448197596912987	0.654010596887225	0.995517635545774
PF3D7_1423200	4.72928902532383	-0.906597582303049	0.588698800476882	-1.54000242835326	0.123559761501302	0.995517635545774
PF3D7_0532000	179264.02508857	-0.277059892831851	0.370837429391883	-0.747119548547695	0.4549914011117	0.995517635545774
PF3D7_1446600	12.5780050806638	-0.551808070108614	0.491538306245167	-1.12261458180919	0.261601219665029	0.995517635545774
PF3D7_0310000	7.77982479050382	-0.927693127689736	0.55606394272047	-1.66832095451311	0.0952520303618719	0.995517635545774
PF3D7_1343500	6.55628833014579	0.530241129369903	0.578376805697207	0.91677453892834	0.359260797214136	0.995517635545774
PF3D7_1405900	8.38413855309696	-0.330506472954083	0.538565957374593	-0.613678730392168	0.539427646220242	0.995517635545774
PF3D7_0509400	15.8825370917109	0.313685786330816	0.47506863738912	0.660295716540601	0.509064078395053	0.995517635545774
PF3D7_0105200	8.44525534353598	0.628609290346835	0.542317163073285	1.15911745588972	0.246408311506185	0.995517635545774
PF3D7_1011700	8.38045560111551	0.493999470950504	0.533925426482438	0.925221850184264	0.354850519967894	0.995517635545774
PF3D7_0517000	28.1353208529247	0.353593407492134	0.409986195269055	0.862451983926157	0.388438844919041	0.995517635545774
PF3D7_1220200	5.87770987144932	-0.690439098010694	0.571562849165575	-1.2079845620104	0.227053200613695	0.995517635545774
PF3D7_1228900	5.33922432345744	-0.500704509694507	0.573561696921097	-0.872974106155118	0.382677191628947	0.995517635545774
PF3D7_0524000	46.8810204155301	-0.146844010483306	0.354385094806185	-0.414362829124108	0.678608406923729	0.995517635545774
PF3D7_0629600	5.08239518845214	-0.603614534493028	0.582774326522174	-1.03576033984754	0.300313964332204	0.995517635545774
PF3D7_1312700	11.1802657396021	0.278199583503315	0.509665593682213	0.545847290756648	0.585170912823022	0.995517635545774
PF3D7_0504400	9.16252481293787	0.299330669938695	0.540336450992117	0.55397089977752	0.57959876135817	0.995517635545774
PF3D7_1408100	27.5208327739479	-0.222894002425961	0.452469192532979	-0.492616969518239	0.622283255377866	0.995517635545774
PF3D7_0206100	9.86190100224297	0.307878854305013	0.52106564959773	0.59086384708472	0.554611651250168	0.995517635545774
PF3D7_1467400	7.64142078039537	-0.545164726380061	0.577080187954485	-0.944694927601741	0.344814647402983	0.995517635545774
PF3D7_0503500	5.19921560570124	-0.326117938896431	0.574596167493853	-0.567560240296799	0.57033361125964	0.995517635545774
PF3D7_1210000	9.34477411141478	0.220185427661174	0.526257533114204	0.418398623879443	0.675655692534075	0.995517635545774
PF3D7_1019100	5.91694284021788	-0.495048838243483	0.574641529559443	-0.861491578276668	0.388967357552045	0.995517635545774
PF3D7_1004600	5.96550449236234	-0.277981140342911	0.584069048199738	-0.47593883154693	0.634117956528534	0.995517635545774
PF3D7_1022500	6.65285574811046	-0.57218848538394	0.559207048374845	-1.02321400820469	0.306206671084408	0.995517635545774
PF3D7_1033100	72.1933394532027	0.349165833220447	0.320994185294497	1.08776373285424	0.27669942390485	0.995517635545774
PF3D7_1451800	22.8807611065983	0.176203081552031	0.420087400953524	0.419443861330002	0.674891774521464	0.995517635545774
PF3D7_0727500	4.89482429980515	0.543737247623657	0.577948166887795	0.940806250068478	0.346804157398465	0.995517635545774
PF3D7_0402400	23.7007292846018	-0.31746663473168	0.425185542623274	-0.746654349470591	0.455272232380714	0.995517635545774
PF3D7_1345400	7.88994387860029	0.626930842914305	0.559588313226424	1.12034298804348	0.262567629818673	0.995517635545774
PF3D7_0912000	10.1683241597616	0.575208416616914	0.518942365599022	1.10842447012963	0.267678541751783	0.995517635545774
PF3D7_1230700	10.7705297724768	0.43777414024343	0.51339534968408	0.852703750653013	0.393823610438732	0.995517635545774
PF3D7_1037900	4.58571975022117	-0.270112814502072	0.591070223022644	-0.456989379571103	0.647678679152056	0.995517635545774
PF3D7_1315400	40.685525760016	0.263526028435419	0.395751989215327	0.665886806931589	0.505483453861202	0.995517635545774
PF3D7_1432000	12.3877831913191	0.432808618998526	0.503812737381248	0.8590664484749	0.390303856731563	0.995517635545774
PF3D7_1023900	110.102305583123	0.255293129654106	0.361888881496782	0.705446181706957	0.480532612873076	0.995517635545774
PF3D7_0625300	7.66032996008024	0.715721133512186	0.57823713638051	1.23776403914882	0.215803566060543	0.995517635545774
PF3D7_0505900	12.2953184987242	-0.524982364071748	0.487500600948158	-1.07688557316789	0.281531389043675	0.995517635545774
PF3D7_0515300	9.47854288410577	0.819222971854879	0.531253038672605	1.54205795020354	0.12305951203646	0.995517635545774
PF3D7_1343700	8.1201535260585	0.512533267773066	0.538718616208104	0.951393273506399	0.341404773657397	0.995517635545774
PF3D7_0217900	10.2891296002042	0.786345749062464	0.534184705570394	1.47204841483212	0.141007804076505	0.995517635545774
PF3D7_1200900	6.06763273004067	-0.453535462642308	0.572313445723312	-0.792459911664511	0.428092557764439	0.995517635545774
PF3D7_0731500	48.0417314262112	-0.245693347492441	0.58773505041123	-0.418034192993139	0.675922117614981	0.995517635545774
PF3D7_0410300	5.31657182370003	0.456377886989337	0.581587484963874	0.784710639049748	0.432623243550823	0.995517635545774
PF3D7_1013100	7.51273379404229	0.267813872438274	0.563124532071054	0.475585518274814	0.634369694547531	0.995517635545774
PF3D7_1411400	6.55210758761203	0.730931323567314	0.583813876388381	1.2519937485711	0.210572141901113	0.995517635545774
PF3D7_1125400	6.37073122387516	0.355735288768578	0.566174342987453	0.628314039967829	0.529798235978308	0.995517635545774
PF3D7_0308800	4.32787859730591	-0.773993427781266	0.588703985052899	-1.31474127478807	0.188596869829027	0.995517635545774
PF3D7_0608700	26.7372510613863	-0.572706942467658	0.419395230037838	-1.36555425872628	0.172078911785496	0.995517635545774
PF3D7_0204300	10.1271343949661	0.310954606139144	0.55165510277135	0.563675754247539	0.572974820992578	0.995517635545774
PF3D7_0611700	34.3759951124613	-0.480746821304125	0.378465199439819	-1.27025370368451	0.203994273507616	0.995517635545774
PF3D7_1145100	7.99616945015025	0.656773562192779	0.558919868243867	1.1750764277827	0.239964140344235	0.995517635545774
PF3D7_0603800	9.97960829573338	0.368610165979705	0.54895596064085	0.671474931339466	0.50191802415901	0.995517635545774
PF3D7_1140600	7.27737701003342	0.49957061001373	0.58112251052009	0.859664874393917	0.389973802587799	0.995517635545774
PF3D7_1139700	5.92701877499683	0.678588425968208	0.577490645112435	1.17506392824093	0.239969140683037	0.995517635545774
PF3D7_1456800	31.4848993426756	-0.606964142278224	0.41022977040249	-1.47957117223041	0.138987724514416	0.995517635545774
PF3D7_1005500	20.6664973364514	0.60628369526121	0.437558673353769	1.38560547917885	0.165867404237365	0.995517635545774
PF3D7_0508800	11.9873892602234	0.456472284592814	0.511350267053554	0.892680250707696	0.372028429456846	0.995517635545774
PF3D7_0525200	29.7913964209464	0.377644252335137	0.412848011487613	0.914729493244677	0.360333657096507	0.995517635545774
PF3D7_0616000	4.56441812326999	-0.366025558820325	0.58834269598829	-0.622129859546366	0.533856482219176	0.995517635545774
PF3D7_0219800	5.91879736978906	-0.33817362879881	0.564738681161229	-0.598814354461164	0.549296688968634	0.995517635545774
PF3D7_1308900	11.6643656203412	0.439195961479255	0.507178550297328	0.865959258769482	0.386512504248355	0.995517635545774
PF3D7_0513300	17.9662981264834	-0.775183367106791	0.460435969939446	-1.68358559651354	0.0922617842636873	0.995517635545774
PF3D7_0610100	11.7300753504773	-0.366014087245976	0.497894760948857	-0.735123395450977	0.462264347207836	0.995517635545774
PF3D7_0624500	12.7211805067154	-0.228727524567426	0.500706514305831	-0.456809564150627	0.647807930761509	0.995517635545774
PF3D7_0828300	8.42431665016161	-0.443340357146496	0.531219630448503	-0.834570734466624	0.403959445543864	0.995517635545774
PF3D7_0904400	14.4690837274393	-0.584395820095944	0.489007830387252	-1.19506434003961	0.232061893141723	0.995517635545774
PF3D7_0925700	9.11624625001746	0.278832510131613	0.542688336035258	0.513798605233883	0.607392803191259	0.995517635545774
PF3D7_1031400	4.72742114309898	-0.940172790843057	0.589778467345076	-1.59411176042982	0.110911005305211	0.995517635545774
PF3D7_1242700	46.6345131368111	-0.568512578240776	0.362219988068767	-1.56952293348551	0.116526140013535	0.995517635545774
PF3D7_1228600	102.609596652359	-0.306084700561143	0.390620881487179	-0.783585095081993	0.433283604390885	0.995517635545774
PF3D7_1427400	15.6480896848434	0.480889890255899	0.526550739776287	0.913283096820284	0.361093669988959	0.995517635545774
PF3D7_0922800	23.5068591233514	0.430299329695249	0.433105597344797	0.99352059251427	0.320456320228801	0.995517635545774
PF3D7_1453700	43.9961463847945	0.201911662799808	0.440177107544055	0.458705505895941	0.646445659670496	0.995517635545774
PF3D7_0525100	24.5877548447238	0.373504750276683	0.443933584284068	0.841352768745882	0.400150336838612	0.995517635545774
PF3D7_0617100	14.0506685912498	0.438856791762249	0.508642359309074	0.862800322722592	0.388247261702565	0.995517635545774
PF3D7_0914200	12.3069957485157	0.477813278396984	0.504531188800193	0.947044085685276	0.343616314836019	0.995517635545774
PF3D7_1212900	41.0795586849435	0.173218182514212	0.359984519433526	0.481182309691508	0.630386932626915	0.995517635545774
PF3D7_0807500	17.7038980202568	-0.383316205439528	0.464754358869646	-0.824771619940934	0.409501261829416	0.995517635545774
PF3D7_0805700	28.4322631833138	0.274502369080065	0.409697986806869	0.670011515603237	0.502850449318092	0.995517635545774
PF3D7_0308900	5.94587206563916	0.341006917276543	0.563404550510027	0.60526120523493	0.545005454019081	0.995517635545774
PF3D7_0323000	23.2618165981771	-0.660200179918772	0.416843245870271	-1.58380922915143	0.113237138425931	0.995517635545774
PF3D7_0810100	12.4766718383636	-0.338270025733469	0.517140661624616	-0.654116086464331	0.513037018322161	0.995517635545774
PF3D7_0731300	41.0859168532059	0.230223236769731	0.38109384176972	0.604111668928113	0.545769401998754	0.995517635545774
PF3D7_1455500	6.69877320896148	0.242420471755912	0.565743450403014	0.428498945207799	0.668287901330145	0.995517635545774
PF3D7_0800300	6.82150292822164	-0.842799963378537	0.553134277526221	-1.52368059189495	0.12758851998109	0.995517635545774
PF3D7_1444100	12.3941157983143	-0.831148936566287	0.530744380373497	-1.56600609879541	0.11734718938047	0.995517635545774
PF3D7_1104000	5.16440329694041	0.46202848594308	0.582318203786511	0.793429576713813	0.42752758436409	0.995517635545774
PF3D7_1129200	19.5997606370972	0.286018721927688	0.45535801671991	0.628118340790336	0.529926419054779	0.995517635545774
PF3D7_0613000	5.31338099844103	-0.3866445902879	0.5853642383379	-0.660519664449863	0.508920403515765	0.995517635545774
PF3D7_1352100	7.22617981595732	0.648771498854775	0.573446118729654	1.13135563685039	0.257905435757949	0.995517635545774
PF3D7_1407300	8.39573802421384	0.692983146118574	0.540632657534216	1.28180038046391	0.199912680716755	0.995517635545774
PF3D7_1347200	141.971343388008	-0.166401608955227	0.294216282026502	-0.565575799575354	0.571682182912414	0.995517635545774
PF3D7_0403900	7.00943183387722	-0.876702632200925	0.54858125429754	-1.59812721512613	0.110014667957011	0.995517635545774
PF3D7_1106100	4.84508353700921	0.537269327598574	0.579226743576069	0.927563054636504	0.353634269611975	0.995517635545774
PF3D7_1247500	8.09022146177561	-0.661258983876173	0.548435009277972	-1.20571986231648	0.227925523866147	0.995517635545774
PF3D7_1432700	14.7228779204011	-0.274959639175457	0.472429601270033	-0.582011877402015	0.560558680561251	0.995517635545774
PF3D7_1410700	26.1259103601126	0.696837207881968	0.426834803482529	1.63256885848225	0.102559705302824	0.995517635545774
PF3D7_0217500	33.6908990994962	-0.345034532187951	0.462881415841567	-0.745405886647322	0.456026386298515	0.995517635545774
PF3D7_1313800	9.19191150913964	0.308276386028467	0.536091165512294	0.575044704819702	0.565261063070149	0.995517635545774
PF3D7_1333300	5.48894960240649	-0.847739168918727	0.590747020560823	-1.43502910622203	0.151278803640319	0.995517635545774
PF3D7_0800200	7.1286920846113	-0.709123777771278	0.579892500010421	-1.22285385266844	0.22138490103152	0.995517635545774
PF3D7_1337300	5.24359071474952	0.520855017318708	0.574434136980384	0.906727131602373	0.364551112098807	0.995517635545774
PF3D7_1244400	15.984384537235	-0.272394512083229	0.466256470301559	-0.584216047247673	0.559074966391803	0.995517635545774
PF3D7_0614100	5.52826192187103	-0.261958240087328	0.573691984236549	-0.456618267790396	0.64794544654443	0.995517635545774
PF3D7_1307000	4.62456896804489	-0.240740445836361	0.588357468681644	-0.4091737738552	0.682412139342323	0.995517635545774
PF3D7_0306100	7.95007458636017	0.545646972977475	0.560134157442132	0.974136223845349	0.329988905701255	0.995517635545774
PF3D7_1364300	6.25995640307784	-0.462450050394092	0.565163782377934	-0.818258467392103	0.413209616119819	0.995517635545774
PF3D7_1246300	5.02835294048741	-0.43109639540774	0.577007829823587	-0.7471239957689	0.454988716885134	0.995517635545774
PF3D7_1439900	39.0024519200595	-0.222544120452317	0.411848652126147	-0.540354130828024	0.588952834417582	0.995517635545774
PF3D7_1205700	5.72572503292647	-0.559670688223293	0.579558961519961	-0.965683779188732	0.334202438638952	0.995517635545774
PF3D7_1145400	18.3469645106465	-0.38750050328513	0.445719773860156	-0.869381449984105	0.384638525849932	0.995517635545774
PF3D7_1406300	17.7927140109673	0.410805889084701	0.462941401495063	0.887382048263578	0.374873245148615	0.995517635545774
PF3D7_0108300	41.0151319633125	-0.329913523722655	0.381068646559094	-0.865758772603438	0.386622462193573	0.995517635545774
PF3D7_0605800	23.5528349040838	-0.522112853103483	0.453267098088477	-1.15188782796135	0.249367170657626	0.995517635545774
PF3D7_0710800	7.90461269723147	0.52505671148355	0.562706628155891	0.933091392941776	0.350772782704321	0.995517635545774
PF3D7_0310700	10.8734673339625	0.379580535827799	0.507165756579113	0.748434867503892	0.45419789780547	0.995517635545774
PF3D7_0825000	17.1768890739959	0.356393144490355	0.469131339991201	0.759687350022362	0.44744149197911	0.995517635545774
PF3D7_0811800	6.37967384006351	-0.309195862055406	0.56360718930862	-0.548601699766638	0.58327881909986	0.995517635545774
PF3D7_1225100	4.3385483146888	0.340972259770973	0.591504808344002	0.576448838557325	0.564311841494506	0.995517635545774
PF3D7_0415800	6.25047923878406	-0.760434925332895	0.571827791588893	-1.32983205174399	0.183573612976723	0.995517635545774
PF3D7_0528800	6.09438275407073	-0.848011474280188	0.590719806648053	-1.43555618879972	0.151128668864251	0.995517635545774
PF3D7_1219100	30.1087984026314	-0.449155158458045	0.439145218712392	-1.02279414489586	0.306405186981003	0.995517635545774
PF3D7_1345800	7.24217034335254	0.689409206532881	0.563776453103853	1.22284143429077	0.221389592322999	0.995517635545774
PF3D7_0929700	5.86647788073922	-0.904300435443072	0.577276259287607	-1.5664951067952	0.117232753229354	0.995517635545774
PF3D7_1349200	13.3063653539006	0.503454868902865	0.486059548791356	1.03578845463434	0.300300844959042	0.995517635545774
PF3D7_1414800	4.84227050235454	0.417492163568819	0.584842005369113	0.713854613273418	0.475317085017596	0.995517635545774
PF3D7_0728400	5.03895852636273	-0.308205532096111	0.580586917152413	-0.530851665772555	0.595521574044188	0.995517635545774
PF3D7_0103400	8.88731397006459	0.773739623475499	0.548830250368314	1.40979769784237	0.158599426602642	0.995517635545774
PF3D7_1338900	10.0385401957294	-0.349101380465866	0.512354278180122	-0.681367162007256	0.495639195854247	0.995517635545774
PF3D7_0927800	11.2160431341666	-0.498592912049668	0.507371831143101	-0.982697267458358	0.325756455991652	0.995517635545774
PF3D7_1368900	9.37021383300022	-0.717617749102816	0.52083256766523	-1.37782810379875	0.168256366851987	0.995517635545774
PF3D7_0824500	7.65695563789461	-0.520607599143886	0.555012210027102	-0.938011073879734	0.348238719194187	0.995517635545774
PF3D7_1127600	13.8032579261739	-0.270647973614253	0.478258790800613	-0.565902768166966	0.571459879695517	0.995517635545774
PF3D7_1133200	25.2881302165439	0.452301097928845	0.428539304631464	1.0554483405386	0.291220324188158	0.995517635545774
PF3D7_0320100	17.7326293457395	-0.502853058565588	0.446892857543511	-1.12522062073151	0.260495557114131	0.995517635545774
PF3D7_0908500	6.76672086943448	-0.47626877737787	0.580388912433913	-0.820602818514562	0.411872541725112	0.995517635545774
PF3D7_1424100	65.1482455463261	-0.443133693715699	0.332505997204631	-1.33270887575296	0.182627359404573	0.995517635545774
PF3D7_1449500	10.7919169456377	0.500562757958707	0.517938778155923	0.966451594416078	0.333818257417249	0.995517635545774
PF3D7_1370800	24.3499082590599	0.675366608084151	0.437608312137275	1.54331302526149	0.122754844804632	0.995517635545774
PF3D7_0202100	9.90516975001344	-0.529354423256211	0.532817384633458	-0.993500659931302	0.320466029028823	0.995517635545774
PF3D7_0320600	4.39130291997793	0.234572788188764	0.584859234726658	0.401075633692259	0.688364439799735	0.995517635545774
PF3D7_0921600	11.9144060801878	0.642129393206087	0.53864741010649	1.19211450971079	0.233216348402209	0.995517635545774
PF3D7_1311300	5.4771613776001	0.332683603314157	0.574092369398644	0.579494905432447	0.562255283195824	0.995517635545774
PF3D7_0903600	9.27024378894407	-0.75108168161569	0.524864318485218	-1.43100160396376	0.152429755440301	0.995517635545774
PF3D7_1461300	63.4370979181372	-0.549962277149656	0.335365532390812	-1.63988908827031	0.101028230055438	0.995517635545774
PF3D7_0822200	4.41616658560387	-0.442752191395674	0.580181777206583	-0.763126676483024	0.445387852086257	0.995517635545774
PF3D7_1366400	15.3040617692771	0.253440257842214	0.465559039774003	0.544378341284582	0.586181146930448	0.995517635545774
PF3D7_0909900	8.81286134628988	0.698306715977381	0.54548839464725	1.28014953723984	0.200492549463245	0.995517635545774
PF3D7_0309200	19.5666040729689	0.205755711298439	0.481323256703658	0.427479263536021	0.669030285639569	0.995517635545774
PF3D7_0418700	6.19243553748871	-0.634922188593477	0.57164716930443	-1.11068894011325	0.26670226445315	0.995517635545774
PF3D7_1134500	15.1519728294749	-0.392521296181853	0.504731055333543	-0.777684059726546	0.43675529168742	0.995517635545774
PF3D7_1142600	36.284411145432	-0.483137847582488	0.369605884037953	-1.30717033588371	0.191154867752075	0.995517635545774
PF3D7_1132600	4.16301638847695	0.564112399849953	0.58976463669526	0.956504281116194	0.338817522499155	0.995517635545774
PF3D7_0310300	7.8903027325206	-0.287216443204817	0.544756190055655	-0.527238512288357	0.598027967462986	0.995517635545774
PF3D7_1107300	61.4429311491107	0.238807360932169	0.324967758326555	0.734864782161543	0.462421848607617	0.995517635545774
PF3D7_0519200	84.3174136209291	-0.478365175207136	0.322991880343643	-1.48104396524825	0.138594858196841	0.995517635545774
PF3D7_1010600	27.1958952246068	0.313559642975766	0.422299966720317	0.742504541051578	0.457781701492567	0.995517635545774
PF3D7_1341200	43.8361346562428	-0.549591992615694	0.369995234163572	-1.48540289676468	0.137437128781342	0.995517635545774
PF3D7_0913200	36.0557541597949	-0.19162244885589	0.401750061190506	-0.476969308450272	0.633383976837189	0.995517635545774
PF3D7_1118500	6.13912334152577	0.505738497341076	0.569664311926114	0.887783360749954	0.374657295017002	0.995517635545774
PF3D7_0810400	4.26153848238646	0.72384030665798	0.590413011999378	1.22598975962058	0.220202528661301	0.995517635545774
PF3D7_1033700	12.3636263217768	0.285699795564778	0.521143783032263	0.548216835481449	0.583543023500064	0.995517635545774
PF3D7_1369200	7.8206485354033	-0.378057042407949	0.578258957000832	-0.653785017648079	0.513250320373018	0.995517635545774
PF3D7_0927500	7.26680153208513	0.35580529058256	0.554677864571472	0.641462934269866	0.521221955375906	0.995517635545774
PF3D7_0627900	7.75129692036442	-0.894549245745255	0.553506804146908	-1.61614859843318	0.106062189042838	0.995517635545774
PF3D7_0809600	15.200753605859	-0.231591312849565	0.464883803339791	-0.498170319520232	0.618364000334309	0.995517635545774
PF3D7_0707800	12.7898984482689	0.596157967451187	0.497300025171898	1.19878933697041	0.23060986979251	0.995517635545774
PF3D7_0606100	5.26718014511019	0.599534861159139	0.585142346431567	1.02459660425424	0.305553567451542	0.995517635545774
PF3D7_0503400	79.028142334845	-0.144921496373321	0.316955865124482	-0.45722926223941	0.647506267645119	0.995517635545774
PF3D7_1359000	11.0914968090648	0.379255257559026	0.517015276979332	0.73354748775477	0.463224575470289	0.995517635545774
PF3D7_1116400	7.93959782930208	0.502751337645156	0.541658819013631	0.928169762952763	0.353319516439835	0.995517635545774
PF3D7_0818000	13.4882217649889	-0.485353210509568	0.507990932916162	-0.9554367589267	0.339356872308315	0.995517635545774
PF3D7_0705400	18.3698001560633	0.555876287654079	0.457621931850655	1.21470639618621	0.224478092156656	0.995517635545774
PF3D7_1352800	5.86870873282659	0.868131972079286	0.573784616829183	1.51299276177307	0.130281497458631	0.995517635545774
PF3D7_1338300	33.3339603785327	0.30198718878945	0.397738504238259	0.759260633736757	0.447696661376436	0.995517635545774
PF3D7_API02900	11.4924039063632	-0.830336067651395	0.526531723669554	-1.57699152838226	0.114797474380672	0.995517635545774
PF3D7_0907100	6.20659852765286	-0.580217867758757	0.569278170467022	-1.01921678690535	0.308100058818327	0.995517635545774
PF3D7_0611200	4.93889020463517	0.590319195256303	0.578195118336141	1.02096883307326	0.307269205219414	0.995517635545774
PF3D7_1017900	11.4543848189181	-0.490647681675579	0.519851880728589	-0.943822076757558	0.345260577082959	0.995517635545774
PF3D7_0420000	19.2462455098418	0.684137617973178	0.448383885650837	1.52578547059099	0.127063300307211	0.995517635545774
PF3D7_1004400	15.6206111874044	0.218072744582524	0.49978437271958	0.436333660045991	0.662594663540687	0.995517635545774
PF3D7_1123900	16.5587187684388	-0.474571319795476	0.457229633982851	-1.03792773810736	0.29930369862663	0.995517635545774
PF3D7_0919400	12.5182354980188	0.42445039864078	0.499579144552687	0.849615928264628	0.395538653374152	0.995517635545774
PF3D7_1005600	5.60638066146612	0.323987768955233	0.568417538420246	0.56998200628303	0.568689902369052	0.995517635545774
PF3D7_1231900	6.90858260040625	-0.505763438404943	0.558857295342014	-0.904995680687002	0.365467675458179	0.995517635545774
PF3D7_0720200	4.78732352252796	-0.262888303923616	0.577189068433772	-0.455463067997761	0.64877613153192	0.995517635545774
PF3D7_1034700	4.97295236824227	-0.310279467874528	0.579612237834311	-0.535322492557903	0.59242687553588	0.995517635545774
PF3D7_1453000	7.3447606762733	0.492614810210171	0.560894389577883	0.878266603060342	0.37979905519932	0.995517635545774
PF3D7_0619100	4.79343768032293	-0.391530077032839	0.587848090501567	-0.666039548922878	0.505385821858508	0.995517635545774
PF3D7_0936100	9.95178014189383	0.351481870656874	0.526352107215205	0.667769475677555	0.504280753900947	0.995517635545774
PF3D7_1124300	11.2008158100654	-0.446816780110007	0.539091274334751	-0.828833263275106	0.407198763082364	0.995517635545774
PF3D7_1439600	9.04527725171399	-0.50324044501277	0.549306167935498	-0.916138347588812	0.359594336882823	0.995517635545774
PF3D7_0820900	8.59097774789627	0.356396864471313	0.541694994833164	0.65792903362727	0.510583733362529	0.995517635545774
PF3D7_1410400	58.9854823190228	-0.582409286415948	0.448335740100432	-1.29904719682951	0.193927732527425	0.995517635545774
PF3D7_1337500	8.28629356398575	-0.269958546112414	0.564659888155981	-0.478090531618993	0.632585770862373	0.995517635545774
PF3D7_0814900	6.16896413992424	0.441869548162215	0.584999570209192	0.755333115893068	0.450049133468562	0.995517635545774
PF3D7_1137400	8.11739882343719	-0.291862742860138	0.546663571975167	-0.533898283738937	0.593411909554446	0.995517635545774
PF3D7_1417800	14.0172464431798	-0.308339244175518	0.476302179681323	-0.647360556657156	0.517398617480955	0.995517635545774
PF3D7_1350500	7.9602426491572	-0.331754742670768	0.565539268525025	-0.586616635014599	0.557461207854439	0.995517635545774
PF3D7_1326600	18.2408774007987	0.714998193035947	0.450149578957414	1.58835690725724	0.112205656016385	0.995517635545774
PF3D7_0704300	22.1356467839283	-0.18637444404441	0.435836287393541	-0.427624889058679	0.668924242427609	0.995517635545774
PF3D7_1017800	4.20955586693181	0.236834679499953	0.589387305344979	0.40183199969217	0.6878076702443	0.995517635545774
PF3D7_0710200	28.272580611868	0.541439266169632	0.399184121313608	1.35636473812611	0.174983146846052	0.995517635545774
PF3D7_0726000	179709.440486433	-0.278597807841241	0.370980403289032	-0.750977155049845	0.452666404521355	0.995517635545774
PF3D7_0513100	8.85501471664893	-0.855831130777688	0.529786462558571	-1.61542657516107	0.106218349069084	0.995517635545774
PF3D7_0516900	99.1642601967554	-0.438717130184583	0.288016576112782	-1.52323569742316	0.127699748121494	0.995517635545774
PF3D7_1018300	5.93361373938673	0.866387120468667	0.576595989776288	1.50258957022024	0.132944914575574	0.995517635545774
PF3D7_0503000	7.22345831847579	0.509732136761171	0.552311735743318	0.922906582955653	0.35605588974755	0.995517635545774
PF3D7_1228700	10.8979865497683	-0.391596154880809	0.557970625362844	-0.701822169627939	0.482790071243817	0.995517635545774
PF3D7_0803400	14.67530429727	0.377973130037129	0.49019177954299	0.771071947370306	0.44066428722202	0.995517635545774
PF3D7_1470600	5.08360585664783	0.574495742086296	0.590409679284361	0.973045941222789	0.330530469606739	0.995517635545774
PF3D7_0603200	5.22342670257752	-0.359839025357725	0.575611240800176	-0.625142457012307	0.531877564597635	0.995517635545774
PF3D7_1124900	41.1933743075441	-0.304752810250656	0.357458158694753	-0.852555195168718	0.393906018120519	0.995517635545774
PF3D7_1346300	73.7745291826297	0.225425573446635	0.331553679182691	0.679906716771562	0.496563528397501	0.995517635545774
PF3D7_1463900	19.7090982183894	-0.344238641057641	0.511770643995173	-0.672642413348132	0.501174811837791	0.995517635545774
PF3D7_1242800	13.6042241060084	0.549512527261777	0.492482585966009	1.11580092965907	0.264507355783166	0.995517635545774
PF3D7_0203700	5.72990507419287	0.525143277303458	0.578824168096346	0.907258725962609	0.364269995007781	0.995517635545774
PF3D7_1341900	18.1336691633385	0.219716390610778	0.467424460008575	0.470057537439841	0.638313910459639	0.995517635545774
PF3D7_0816600	10.8485490243609	0.445251401464168	0.508158709289595	0.876205392773113	0.380918385361479	0.995517635545774
PF3D7_0917900	198.026125379824	-0.2158749691713	0.261903660018142	-0.824253350091961	0.409795619111696	0.995517635545774
PF3D7_1346400	43.0020248252881	0.221991478706321	0.372362727047622	0.596169977769902	0.551061679627218	0.995517635545774
PF3D7_1342600	27.4887707876043	-0.549693480689992	0.528805206864015	-1.0395008853068	0.298571846542782	0.995517635545774
PF3D7_0605900	9.39056916547883	-0.635084953097399	0.523614285885428	-1.21288698612085	0.225173031868685	0.995517635545774
PF3D7_1343400	7.04466989832421	0.481248142105593	0.562574594251917	0.855438811177622	0.392308265262864	0.995517635545774
PF3D7_0921200	5.76347392517168	0.652750329029627	0.568089753080327	1.14902676115922	0.250544945966368	0.995517635545774
PF3D7_1426800	8.57361722700217	0.387387566808588	0.530362560529918	0.730420274050879	0.465133329473609	0.995517635545774
PF3D7_1244100	13.2538225570213	-0.325689337679789	0.490082569185023	-0.664560133655418	0.506331875107698	0.995517635545774
PF3D7_1235200	7.17698547368037	-0.328083221394474	0.579913734670369	-0.565744871659164	0.571567227079347	0.995517635545774
PF3D7_1453800	13.7291653663591	-0.202737959228746	0.500657836706119	-0.404943145527452	0.68551930284572	0.995517635545774
PF3D7_1423700	29.1730183002649	0.185239223090602	0.395333524791785	0.468564418330482	0.639381015563819	0.995517635545774
PF3D7_0307500	8.6856908191134	0.938885455259451	0.554902779058657	1.6919818942918	0.0906494258508356	0.995517635545774
PF3D7_0516700	12.2839282015372	0.669410641915152	0.498616218664596	1.34253683866919	0.179421994140142	0.995517635545774
PF3D7_0904500	4.88020653131661	0.240897504905087	0.581725760055502	0.414108367630313	0.6787947449934	0.995517635545774
PF3D7_0705700	46.6430670472034	-0.345424785440673	0.37550371676465	-0.919897114246597	0.357626527049218	0.995517635545774
PF3D7_0802400	4.23833786733519	0.268714966168886	0.585468455085342	0.45897428603513	0.646252631654516	0.995517635545774
PF3D7_0914600	12.1604572359867	0.367020666779719	0.508068686842388	0.722383953753827	0.470058449596236	0.995517635545774
PF3D7_1350300	4.55992507821699	0.443274221940712	0.591161530169235	0.749836041959317	0.453353458631684	0.995517635545774
PF3D7_0205800	7.83850403307764	0.415863323703327	0.565576615831167	0.735290873177592	0.462162365419804	0.995517635545774
PF3D7_1234300	6.00452510801239	-0.578170105229724	0.578758753105451	-0.998982913221497	0.317802968622627	0.995517635545774
PF3D7_1329300	6.78376269749019	0.30330531313211	0.554434190739524	0.547053767963968	0.58434179314618	0.995517635545774
PF3D7_1133000	7.16808724711499	-0.260352864658992	0.565157193968276	-0.460673362097565	0.645032969145472	0.995517635545774
PF3D7_1218500	11.1698733187141	-0.55169675552504	0.531640493036602	-1.03772523491181	0.299397993083528	0.995517635545774
PF3D7_0802200	35.8553326534252	0.554843168548631	0.416334602407098	1.33268569400844	0.182634969933818	0.995517635545774
PF3D7_1466300	25.0316364190488	0.296742751371198	0.424441960440018	0.699136228339832	0.484466899689933	0.995517635545774
PF3D7_0934800	19.9573214718409	-0.458075777831764	0.45712212433785	-1.00208621163391	0.316301956705132	0.995517635545774
PF3D7_1416100	11.0596414690466	-0.402200492313107	0.511407387325002	-0.786458119850166	0.431599145373613	0.995517635545774
PF3D7_1112300	4.2158216937296	0.254733046163805	0.59075238676863	0.431201044412491	0.666322194590751	0.995517635545774
PF3D7_1332800	6.77915217437042	-0.411156456642421	0.586198811441261	-0.701394217486605	0.483057029682218	0.995517635545774
PF3D7_1131800	14.0032152127783	0.249407440429033	0.494238789877675	0.504629433255859	0.613819132973004	0.995517635545774
PF3D7_1232100	18.467098542741	-0.210947509273139	0.480178623884599	-0.439310495678866	0.660436570174294	0.995517635545774
PF3D7_0917600	7.93875762830352	0.337822178081686	0.579000539316661	0.583457449764011	0.559585393207512	0.995517635545774
PF3D7_1114900	8.36403735088234	-0.315844894680827	0.568713348405278	-0.555367472148287	0.578643336761834	0.995517635545774
PF3D7_1372400	6.07039336886877	-0.547273160262876	0.576243566244682	-0.949725415295127	0.342251792276342	0.995517635545774
PF3D7_0818800	5.16106066703424	0.27787888786306	0.582057424959024	0.477408028739814	0.633071598152507	0.995517635545774
PF3D7_1410300	21.3362788415307	-0.287103582875265	0.417853761279619	-0.687091057876446	0.492025348863113	0.995517635545774
PF3D7_1328400	7.51970030120952	0.291462106677955	0.561310368460854	0.519253024805441	0.603584306697139	0.995517635545774
PF3D7_1307800	6.49977906514264	0.404244267604872	0.571110883967587	0.707820983547942	0.479056433835065	0.995517635545774
PF3D7_0218200	7.32650175799164	0.497780729791684	0.559756749238104	0.889280442744502	0.373852379508939	0.995517635545774
PF3D7_0811600	19.8800401534114	0.44151974234232	0.47552430041863	0.928490388301137	0.353153251326185	0.995517635545774
PF3D7_1015400	6.4307957422826	0.36714024900542	0.565583828507798	0.649134983180231	0.516251131700834	0.995517635545774
PF3D7_0501600	58.8246408757063	-0.537070665175733	0.483208084555634	-1.11146870746095	0.266366652302403	0.995517635545774
PF3D7_0631100	5.14957277039759	-0.840626317283882	0.586808475285548	-1.43253949574403	0.151989483280467	0.995517635545774
PF3D7_1013500	14.4822174883104	0.395588297765401	0.48120157910531	0.822084371586875	0.411028879542616	0.995517635545774
PF3D7_0508300	25.3251667746323	-0.523169733670805	0.42491304212138	-1.2312395285842	0.218233291324175	0.995517635545774
PF3D7_0527200	16.4274273460293	0.330571716807437	0.455893351308824	0.725107562675346	0.468386045200058	0.995517635545774
PF3D7_1313600	6.99090905064467	0.468980689082157	0.58225098992753	0.805461385545311	0.420553480713145	0.995517635545774
PF3D7_1330700	6.09451228297031	0.819626504792357	0.57470219382862	1.42617605012445	0.153817531005444	0.995517635545774
PF3D7_0110800	6.46093355510597	-0.290223291593817	0.576772170764646	-0.503185323953925	0.614833982133281	0.995517635545774
PF3D7_1108700	38.3945096681349	0.215864137940253	0.370761278570107	0.582218668499481	0.560419400234233	0.995517635545774
PF3D7_1212500	19.6715057616457	-0.362343149716562	0.453710429861644	-0.798622041435231	0.424509603034271	0.995517635545774
PF3D7_0323800	9.42937613031804	0.796379398789691	0.541710164544716	1.47012083382082	0.141529030726207	0.995517635545774
PF3D7_1317200	6.38635947418872	0.228926896970755	0.565794359736466	0.404611486543245	0.685763113908082	0.995517635545774
PF3D7_1020600	5.7878293544034	0.350470337909069	0.58981060597747	0.594208266784637	0.55237282428766	0.995517635545774
PF3D7_1459300	5.29098694818171	0.584935183898258	0.578233332489334	1.01159021978216	0.311734024081239	0.995517635545774
PF3D7_1434200	20.5967192460848	0.525231117998224	0.508949352908296	1.03199093386579	0.302076364649291	0.995517635545774
PF3D7_1406100	4.2119857270614	0.58862927058889	0.591487238460619	0.995168166469378	0.319654481558644	0.995517635545774
PF3D7_0418100	5.679729330802	0.4891187356462	0.575772864307682	0.849499457106795	0.395603432160636	0.995517635545774
PF3D7_1037700	7.20287493984858	-0.599958766059872	0.556483395788257	-1.07812518864113	0.280977892092975	0.995517635545774
PF3D7_0935000	9.07038134477112	-0.523048724796343	0.5325727463752	-0.982116956521565	0.326042232720573	0.995517635545774
PF3D7_1222700	20.1284155069327	-0.286631120394294	0.469220510486772	-0.610866562710445	0.541287922747888	0.995517635545774
PF3D7_0420900	11.4835100788314	-0.457742871615456	0.548530473082941	-0.83448941139546	0.404005251685565	0.995517635545774
PF3D7_1220900	39.7562193947659	0.337961758982471	0.370589139662777	0.911958076510295	0.361790787180794	0.995517635545774
PF3D7_1003500	56.2312796576222	-0.396594875990888	0.325897698401016	-1.21693058262375	0.223630628523143	0.995517635545774
PF3D7_1132000	10.1247667867483	-0.429155188579176	0.532319734089303	-0.806198157040672	0.42012860120164	0.995517635545774
PF3D7_0613400	16.4128822021637	-0.531165071589359	0.466532188161153	-1.13853895844348	0.254895500781351	0.995517635545774
PF3D7_0714300	10.5303927609415	0.668789846115282	0.525959902180133	1.27156051885916	0.203529312038462	0.995517635545774
PF3D7_0724800	4.52650790713456	0.32074219175135	0.585924134415843	0.54741249406141	0.584095373556696	0.995517635545774
PF3D7_0509000	5.91197554515639	-0.835574682638204	0.563357725145161	-1.48320444602566	0.138020100326143	0.995517635545774
PF3D7_0707700	28.8634735692043	-0.348134578058284	0.408632842486548	-0.851949578844104	0.394242077623152	0.995517635545774
PF3D7_0508600	10.7876577134534	-0.689324933104112	0.514364176952823	-1.34014957493305	0.180196721479055	0.995517635545774
PF3D7_1233600	41.0195689277974	0.151393415061334	0.359657614682367	0.420937605325103	0.67380064418889	0.995517635545774
PF3D7_1366600	7.97031394623404	-0.465787103478454	0.550497818732399	-0.846119798532529	0.39748591698996	0.995517635545774
PF3D7_1371500	7.42625154665892	0.303055823184529	0.582679804764197	0.52010696218856	0.60298902612359	0.995517635545774
PF3D7_0514100	4.47938085248307	0.380493033812245	0.589584402474515	0.645358039010694	0.518695189134353	0.995517635545774
PF3D7_1035700	21.7020068348649	0.270224539741774	0.544703471657111	0.496094763118893	0.619827553849938	0.995517635545774
PF3D7_0711500	11.8018640967397	-0.70802384576623	0.556504089708251	-1.27227069640659	0.203276956487545	0.995517635545774
PF3D7_0523900	4.8548914800015	0.33792243767344	0.581178974602799	0.581442984761087	0.560941934184783	0.995517635545774
PF3D7_1356300	22.8327038509482	-0.29284860200485	0.486014249351007	-0.602551473327997	0.546807110884567	0.995517635545774
PF3D7_1412400	20.8242137238671	0.411355729492751	0.44464817686571	0.925126315354232	0.3549002061068	0.995517635545774
PF3D7_1235600	12.0177067057607	0.456266547543498	0.519847178251559	0.877693611953601	0.380110012095694	0.995517635545774
PF3D7_1425900	4.40672166922808	-0.542970266326657	0.585848614949824	-0.926809848945637	0.354025270424552	0.995517635545774
PF3D7_0305000	9.49890176899771	0.487964006441618	0.527984529186458	0.924201334447232	0.355381500989432	0.995517635545774
PF3D7_0716000	8.72927250057952	0.62166908197943	0.533690285730532	1.16484991127105	0.244079751534367	0.995517635545774
PF3D7_1013700	4.20820393297054	-0.419954647019913	0.58920122587647	-0.712752500464009	0.475998922949251	0.995517635545774
PF3D7_1011500	4.94718691259353	0.486653149665995	0.582948708471094	0.834812981990037	0.403823015303421	0.995517635545774
PF3D7_1474600	21.4607634102527	0.240030475247844	0.425665703652446	0.563894326435629	0.57282605148185	0.995517635545774
PF3D7_0102300	18.3942919420697	0.275643245441732	0.480285202405681	0.573915756848376	0.566024809872115	0.995517635545774
PF3D7_1433700	9.25061779395974	0.401768640189452	0.560443997698179	0.716875623326454	0.473450844356862	0.995517635545774
PF3D7_0102200	14.4208567007409	-0.584475158776351	0.556828651290945	-1.04964993705211	0.293879088771027	0.995517635545774
PF3D7_1106300	4.67342285369039	0.953313275065138	0.591201520273881	1.61250139313496	0.106852877019552	0.995517635545774
PF3D7_1024300	7.92100649230371	-0.409423237112172	0.532924670030158	-0.768257241851842	0.442334371954678	0.995517635545774
PF3D7_1334000	5.20508355963634	-0.292794151366703	0.576401065021943	-0.507969483636462	0.611474744422709	0.995517635545774
PF3D7_0912800	7.39048665812781	0.334367414050122	0.544636829973057	0.613927291818776	0.539263374550176	0.995517635545774
PF3D7_1414600	5.29182172383983	0.361965185389662	0.575970345191075	0.628444135035427	0.529713032353252	0.995517635545774
PF3D7_0310400	16.9123883699826	0.402432031397323	0.451146457118481	0.892020817292234	0.372381774454743	0.995517635545774
PF3D7_0726500	34.9561027407406	0.614025087489003	0.41533710344595	1.47837764166646	0.139306726435109	0.995517635545774
PF3D7_0405400	24.2519289435689	-0.275471246846174	0.417820142093977	-0.659305809111076	0.50969941283302	0.995517635545774
PF3D7_0607400	7.80413693621891	-0.272946212902557	0.546948750831062	-0.499034347345759	0.617755187155023	0.995517635545774
PF3D7_0916200	6.10874929819793	0.868242168229113	0.577167482716838	1.50431580819857	0.13250007062395	0.995517635545774
PF3D7_0413600	17.8174204368003	-0.54163185956759	0.476522625662153	-1.1366340870278	0.255691284095532	0.995517635545774
PF3D7_1315600	22.0039455942853	-0.47920655833058	0.436600176463023	-1.09758672617295	0.272384991641842	0.995517635545774
PF3D7_1317900	4.98909834248196	-0.254169285300854	0.578402492419129	-0.439433246972723	0.660347640566475	0.995517635545774
PF3D7_0109000	7.15216676330038	-0.884002476079263	0.581480054726286	-1.52026276549654	0.128444948163946	0.995517635545774
PF3D7_0813700	8.96643272259724	-0.21827427355929	0.529698174353644	-0.412072920254324	0.680285976360665	0.995517635545774
PF3D7_1310600	7.95510395626937	-0.333852483236103	0.545540955434792	-0.611965939330853	0.540560293030207	0.995517635545774
PF3D7_1206300	4.78802304751767	0.490984491792365	0.585814745346974	0.838122453714541	0.401961933440064	0.995517635545774
PF3D7_1036900	35.8127094904619	0.524203533474203	0.379510494199714	1.38126228783109	0.167198329148044	0.995517635545774
PF3D7_1330500	5.52998308794699	0.423982972987862	0.5721335918069	0.741055898586287	0.458659548060705	0.995517635545774
PF3D7_1358400	5.17130303589204	0.496957603301216	0.589498279229881	0.843017903208201	0.399218431071798	0.995517635545774
PF3D7_1014100	14.0609290522655	-0.425105865663344	0.541845819312172	-0.784551343780747	0.432716667270259	0.995517635545774
PF3D7_0929200	27.0375566935175	-0.461950308790068	0.392793294400994	-1.17606465124242	0.239569042096586	0.995517635545774
PF3D7_1325100	26.3831894903873	-0.320494750500974	0.409873369604019	-0.781936017972102	0.434252176216802	0.995517635545774
PF3D7_0920700	8.40356153351338	-0.538787826680088	0.53413242420348	-1.00871582076964	0.313110942132521	0.995517635545774
PF3D7_1145500	6.49546671173069	-0.525365620594155	0.582580659096162	-0.901790357079872	0.367168243181308	0.995517635545774
PF3D7_1445400	9.76193109383118	-0.21443443196887	0.510662201210258	-0.41991443944875	0.674547958970734	0.995517635545774
PF3D7_0511500	84.6148066225732	0.226657794434911	0.30472691834684	0.743806276336013	0.456993682554586	0.995517635545774
PF3D7_0609900	10.9211036896948	-0.452790660510305	0.560856753985898	-0.807319618231235	0.419482364126335	0.995517635545774
PF3D7_0507100	69.0854441142062	0.133283951977296	0.320412480198506	0.415976156405401	0.677427450800241	0.995517635545774
PF3D7_1122500	4.75876156206957	0.283019032705122	0.587900156064498	0.481406629655789	0.630227525750134	0.995517635545774
PF3D7_0323100	12.987672214248	0.412943688692872	0.493944954587943	0.836011553225311	0.403148403587309	0.995517635545774
PF3D7_0215700	9.76094634594242	-0.546843068750366	0.525968884524708	-1.03968710857206	0.298485291797	0.995517635545774
PF3D7_1361200	6.70731598513535	0.744266410013094	0.557711041745445	1.3345018375175	0.182039445053097	0.995517635545774
PF3D7_0830200	661.344285946694	-0.451845052876432	0.362198659990907	-1.24750614176147	0.212211969659958	0.995517635545774
PF3D7_1030800	4.71231480030132	0.297355920347444	0.580705793815838	0.512059503304604	0.608609365734687	0.995517635545774
PF3D7_1302300	34.9752220221755	0.326468195513549	0.380356435296921	0.858321735134296	0.390714830848321	0.995517635545774
PF3D7_0935100	5.78673436447818	-0.337436893101811	0.577239244199637	-0.584570256600761	0.558836711971128	0.995517635545774
PF3D7_0503800	31.6846555380008	-0.599806709204411	0.377404056398794	-1.58929587277835	0.111993610105003	0.995517635545774
PF3D7_1238600	9.47770883384874	0.310564637165313	0.539510775071553	0.575641213327248	0.56485771802743	0.995517635545774
PF3D7_1343800	21.0663281486878	-0.301145665501569	0.464334507629874	-0.648553274747383	0.516627165351208	0.995517635545774
PF3D7_1329600	6.08807647076854	0.25634992100854	0.574729308536004	0.446035928916753	0.655571292981325	0.995517635545774
PF3D7_1021300	9.18521544006609	0.502775971041387	0.541495511380775	0.928495177659635	0.35315076810719	0.995517635545774
PF3D7_1030300	7.84149282956497	0.347423641547904	0.545491346318062	0.636900372284423	0.524189740265343	0.995517635545774
PF3D7_0817400	7.42386602030744	0.616262196742525	0.56939012434335	1.08231978461732	0.279110457742211	0.995517635545774
PF3D7_1215200	5.40551987717313	0.251293020763152	0.589015407920711	0.426632338278287	0.669647139870614	0.995517635545774
PF3D7_0511000	30.5050835593211	-0.386173101193011	0.393559221774649	-0.981232505368996	0.326478098039254	0.995517635545774
PF3D7_1371300	4966.33819407536	0.186016269112091	0.373337751818584	0.498251966767298	0.618306458652965	0.995517635545774
PF3D7_0614300	43.4587923856089	0.19379247149199	0.370865482736435	0.522541138264178	0.601293611346966	0.995517635545774
PF3D7_0825200	5.15206727199198	-0.233287026344756	0.570867030239247	-0.408653879077562	0.682793684731665	0.995517635545774
PF3D7_1358900	10.1282994843168	-0.42923497332773	0.514621237896286	-0.834079399992107	0.404236242601041	0.995517635545774
PF3D7_1362400	9.25542019211554	0.2991427930782	0.538127205164581	0.555896059904107	0.578281911907527	0.995517635545774
PF3D7_0211700	6.95649642212022	0.393856408152387	0.562090213556452	0.700699636203204	0.483490483143365	0.995517635545774
PF3D7_0929000	6.71295124764235	0.339392233726267	0.561143732083642	0.604822284062647	0.54529708543213	0.995517635545774
PF3D7_1034600	4.89585810763923	-0.798909833357041	0.585668970447616	-1.36409793530029	0.172536744526626	0.995517635545774
PF3D7_0720700	19.0661414700633	0.196971961858922	0.464043188318162	0.424469029645301	0.671223787153517	0.995517635545774
PF3D7_1351700	13.4093303037659	-0.546509373245725	0.562691031159498	-0.971242374557794	0.331427597088364	0.995517635545774
PF3D7_1209300	12.2791727390193	-0.212946659746232	0.527475608620443	-0.403709017566086	0.686426707684376	0.995517635545774
PF3D7_0212000	5.34108775080381	0.317224238203895	0.580997945100851	0.545998898754848	0.585066694197164	0.995517635545774
PF3D7_1431200	8.32298810231759	-0.736918532733292	0.554818687536487	-1.32821505347155	0.184107072778804	0.995517635545774
PF3D7_0319000	15.8374261956519	0.479562584189729	0.475578228730969	1.00837791811747	0.313273069637943	0.995517635545774
PF3D7_1327500	6.24812087094317	0.495261478830984	0.572898694224236	0.864483518332364	0.387322330510131	0.995517635545774
PF3D7_0621300	6.31627085120591	-0.249572113181905	0.578102001223363	-0.43170947800521	0.665952577925069	0.995517635545774
PF3D7_0214400	4.78201428950672	-0.449558087479709	0.58189014419816	-0.772582405737765	0.439769560393599	0.995517635545774
PF3D7_1365700	15.7744800562037	0.445707545210723	0.46171955759624	0.965320913697318	0.334384099850073	0.995517635545774
PF3D7_0106700	9.75604175690506	-0.817705247639792	0.54705666768077	-1.49473591302054	0.134983377695993	0.995517635545774
PF3D7_1030500	10.678066241654	-0.305157887161849	0.521997371198087	-0.584596597606328	0.558818995998736	0.995517635545774
PF3D7_1331600	6.37510712012616	0.268777111244528	0.57803139649683	0.464987045467524	0.641940733656081	0.995517635545774
PF3D7_0527000	26.1917825235614	0.465900960542229	0.407615066196225	1.14299249262279	0.253041708070062	0.995517635545774
PF3D7_0924000	20.8381551020649	0.229214856382569	0.463638062077897	0.494383173278076	0.621035595294663	0.995517635545774
PF3D7_0308100	7.2034843848597	-0.542481980057779	0.550242153119569	-0.985896803765771	0.324183755496621	0.995517635545774
PF3D7_1028200	11.506842464539	0.32029532549349	0.503581960637787	0.636034152390676	0.524754162229944	0.995517635545774
PF3D7_0928600	18.895401379901	-0.333276713038121	0.445182217631482	-0.748629886456974	0.45408031356274	0.995517635545774
PF3D7_0825500	4.46225848673735	0.304942042329544	0.584631714974638	0.521596818165728	0.601951079158709	0.995517635545774
PF3D7_1126900	12.3160444888009	0.224974737423692	0.496146762424571	0.453443929220228	0.650229110041518	0.995517635545774
PF3D7_1217700	5.39839198056227	0.256017042124259	0.577391100082108	0.44340316656743	0.657474145898814	0.995517635545774
PF3D7_1462300	22.0776565505082	0.356374320858863	0.454010629231053	0.784947086949146	0.432484592776124	0.995517635545774
PF3D7_0520000	66.2692167319212	-0.290001954102095	0.320684461072147	-0.904321815695494	0.365824782187968	0.995517635545774
PF3D7_1449100	10.3085032939886	-0.442405885425543	0.524956287265557	-0.84274804618493	0.399369369963963	0.995517635545774
PF3D7_1465000	6.18381905471937	0.311617912652831	0.575602133237385	0.541377272005898	0.588247569484921	0.995517635545774
PF3D7_1445200	7.84879503081392	0.768586448722504	0.547457293030359	1.40392037608655	0.160342561323861	0.995517635545774
PF3D7_1414300	53.4898739747646	-0.555234295064892	0.338174265970141	-1.64185850591575	0.100619330852347	0.995517635545774
PF3D7_0916400	13.7097557376872	0.233910943567135	0.480760442105459	0.486543656842351	0.626581760168597	0.995517635545774
PF3D7_1371800	6.32563596608955	0.628884419003807	0.563864253497397	1.11531173523258	0.264716858287888	0.995517635545774
PF3D7_0214200	4.79611759106	0.25882951172685	0.585617758943713	0.441976882999083	0.658505934196578	0.995517635545774
PF3D7_0814000	58.6084309585437	-0.17894600657801	0.355051742465168	-0.503999798270431	0.614261518742224	0.995517635545774
PF3D7_1367100	4.32359844595155	0.473942620153205	0.586554038454712	0.808011860939217	0.419083754206099	0.995517635545774
PF3D7_1353300	16.0972689335727	0.393429827410873	0.475782145608272	0.826911709576418	0.408287105965718	0.995517635545774
PF3D7_1142800	4.78418856217777	0.588191046690453	0.588391440717717	0.999659420560198	0.317475356437762	0.995517635545774
PF3D7_1430300	6.13061430549176	-0.243369122433653	0.561655894355847	-0.433306451297495	0.664792151974318	0.995517635545774
PF3D7_0821700	35.5550129596617	-0.505581710886638	0.371718335843905	-1.36012045179	0.173791810097698	0.995517635545774
PF3D7_1130200	85.9872869249879	-0.483105464344694	0.304118519482555	-1.58854339146027	0.112163517245341	0.995517635545774
PF3D7_0709700	6.06031103619329	0.64033349155724	0.586945040865374	1.09095988035464	0.275290536480198	0.995517635545774
PF3D7_1018700	20.2045334174494	0.420423282706148	0.440139427540956	0.955204774666606	0.339474151727807	0.995517635545774
PF3D7_1213900	18.2671981191726	-0.34586598390046	0.45381855619225	-0.762123935174527	0.445986038711869	0.995517635545774
PF3D7_0812100	13.3014401311311	0.829416481328762	0.506872880616403	1.6363402206883	0.101768402772758	0.995517635545774
PF3D7_0624600	62.7549284948329	0.570705513359534	0.3589978856577	1.58971831356047	0.111898313752565	0.995517635545774
PF3D7_0601500	5.14957277039759	-0.840626317283882	0.586808475285548	-1.43253949574403	0.151989483280467	0.995517635545774
PF3D7_1238700	8.7725851389093	-0.386797498883786	0.543519321326727	-0.711653631631008	0.476679287402308	0.995517635545774
PF3D7_0907400	20.922521012771	0.312895153857528	0.438910019993102	0.71289134356615	0.475912996160962	0.995517635545774
PF3D7_0830400	58.5638501286203	-0.25999111114091	0.367051622799261	-0.708323012327608	0.478744689593506	0.995517635545774
PF3D7_1349500	34.253288152499	0.235815688451938	0.384305371705316	0.613615384571728	0.539469514823505	0.995517635545774
PF3D7_0321800	16.4495042089123	0.446509134379611	0.468797155208364	0.952457004951648	0.340865261054613	0.995517635545774
PF3D7_0706500	23.168691929006	0.454786843284181	0.421503993614632	1.07896212176812	0.28060461365814	0.995517635545774
PF3D7_0317000	26.220268163628	-0.666823522021307	0.396720818108325	-1.68083824085892	0.0927943385833085	0.995517635545774
PF3D7_1430600	4.32361972500932	0.393673855750546	0.590157605291379	0.667065631656441	0.504730211855433	0.995517635545774
PF3D7_0516000	4.26396114151304	-0.253330660354605	0.585901874211219	-0.432377282792713	0.665467226222768	0.995517635545774
PF3D7_1142100	19.555562702304	-0.402174145785927	0.453661447280635	-0.886507214127768	0.375344268447888	0.995517635545774
PF3D7_0317200	33.1726496379649	0.574165009944689	0.406390338573723	1.4128411909589	0.157702423851307	0.995517635545774
PF3D7_1351800	8.00873250269693	-0.496308633729097	0.533438622396787	-0.930395012455488	0.352166599977126	0.995517635545774
PF3D7_0417500	5.45410485532666	-0.42298977241805	0.573125054534573	-0.738040972160176	0.460489551706142	0.995517635545774
PF3D7_0629900	6.79731162907483	-0.571026298866611	0.55611530141848	-1.02681278038942	0.304508630187506	0.995517635545774
PF3D7_0515000	10.8097124471267	0.51431654600468	0.511599042574646	1.00531178365065	0.314746742768986	0.995517635545774
PF3D7_0318300	9.40875887590659	0.628167948385496	0.533162462636652	1.17819237550786	0.238719921502142	0.995517635545774
PF3D7_1414000	5.90128857252737	-0.703905022365119	0.563537629188533	-1.24908255617058	0.211634880083212	0.995517635545774
PF3D7_1109400	14.7516601362483	-0.411382590969491	0.482209035911855	-0.853120867367341	0.393592280495975	0.995517635545774
PF3D7_0521900	5.42167992946759	-0.962825034781054	0.583347223463483	-1.65051790092445	0.0988370551201007	0.995517635545774
PF3D7_0418600	6.48432856794727	-0.38327843297306	0.577436180691045	-0.663758949974997	0.506844602814646	0.995517635545774
PF3D7_1346200	12.4096675797008	-0.505819483458781	0.489914000344013	-1.03246586769025	0.301853929323295	0.995517635545774
PF3D7_0723600	4.62090137089619	-0.544334258412445	0.585258220258603	-0.930075374544804	0.352332059851613	0.995517635545774
PF3D7_1024800	61.3702504811595	0.450754360537866	0.328524676959662	1.37205632377263	0.170045904639817	0.995517635545774
PF3D7_1201500	4.54775903867253	0.396248298444342	0.587396778900086	0.674583710156406	0.499940285343994	0.995517635545774
PF3D7_1343200	7.01171937689155	0.486938960782052	0.551563046291475	0.882834635235384	0.377325624159973	0.995517635545774
PF3D7_1412700	4.30259874241611	-0.712851791086314	0.589497069383056	-1.20925417293822	0.226565211026918	0.995517635545774
PF3D7_1134800	7.05380828860944	0.394359296512845	0.55076212100011	0.716024725514423	0.473976081702811	0.995517635545774
PF3D7_1471400	15.7393504013766	0.499713518360171	0.469999788783039	1.0632207296392	0.287681863775137	0.995517635545774
PF3D7_1440800	8.30678106207197	0.509367741123522	0.545256505828987	0.934180033944022	0.35021103308763	0.995517635545774
PF3D7_1004000	60.534846743742	-0.54561206101648	0.329602875493068	-1.6553619570226	0.0978510980422111	0.995517635545774
PF3D7_1135400	15.5394638269999	0.30062976072782	0.46655792821383	0.644356772327824	0.519344109007083	0.995517635545774
PF3D7_0321500	9.07774802770678	0.361744006207478	0.522573671752555	0.692235422030155	0.488789497217235	0.995517635545774
PF3D7_1229600	6.17405366984263	0.37710229580483	0.570849973261641	0.66059790394698	0.508870213591646	0.995517635545774
PF3D7_1118200	5.83965407031419	0.705727401495849	0.583511975800419	1.20944801608876	0.226490771063314	0.995517635545774
PF3D7_0212100	10.366423659804	0.734448874140527	0.522023019148134	1.40692813765003	0.15944869900414	0.995517635545774
PF3D7_1202200	4.45726346754228	-0.514719793011044	0.585131428678731	-0.879665264559995	0.379040671801973	0.995517635545774
PF3D7_1115400	42.7886924042232	0.366431232641079	0.363805063078358	1.00721861741148	0.313829728299741	0.995517635545774
PF3D7_0106000	6.66112615650958	0.737097594957368	0.559655353305631	1.31705627508728	0.187819762002557	0.995517635545774
PF3D7_1359400	27.3469837190858	0.377825055308145	0.42165822227525	0.896045743563155	0.370228332757748	0.995517635545774
PF3D7_1324200	4.34235529042988	0.482921053711976	0.584392537470541	0.826364169197352	0.408597542571599	0.995517635545774
PF3D7_1353400	6.67814204807606	-0.239943748781667	0.575899858350592	-0.416641444345687	0.676940690374395	0.995517635545774
PF3D7_1414500	41.8292762543714	-0.423094335468885	0.378803930309649	-1.11692171494375	0.264027799040293	0.995517635545774
PF3D7_1138900	6.15529250613017	0.508475683211099	0.563320042684244	0.902640851882689	0.366716537669774	0.995517635545774
PF3D7_1138600	6.64314262341593	0.323091088969415	0.571716574247495	0.56512458012027	0.571989030768141	0.995517635545774
PF3D7_0304800	8.75908351465295	0.327301424710492	0.562351505248086	0.582022848086981	0.560551291037748	0.995517635545774
PF3D7_0614000	7.22185227838428	0.345098364810437	0.556948082917763	0.619623938738635	0.535505402468794	0.995517635545774
PF3D7_0724400	4.19225219674277	-0.502023901966681	0.591448762468735	-0.848803706801601	0.395990527213003	0.995517635545774
PF3D7_0828800	10.9470684718538	-0.836713686233703	0.585832672929535	-1.42824687815653	0.153220811971489	0.995517635545774
PF3D7_1457500	4.61697653428898	0.75606934142236	0.588024608773201	1.28577840134914	0.198520410164616	0.995517635545774
PF3D7_1403600	6.12052474677041	0.383854600295887	0.572695469859116	0.670259536696379	0.502692356608616	0.995517635545774
PF3D7_1129300	4.32470595280371	-0.253034275579992	0.590728311934971	-0.428342895486355	0.668401493103691	0.995517635545774
PF3D7_0819600	29.0342927472603	-0.241500044005675	0.390127780041275	-0.619028063010853	0.53589787181112	0.995517635545774
PF3D7_1020000	8.11691934928605	-0.509245669894731	0.565594651782194	-0.900372145122118	0.367922239204361	0.995517635545774
PF3D7_0621200	15.7148561833093	0.663883134347367	0.473955080269017	1.40073007334481	0.161294806113719	0.995517635545774
PF3D7_1012200	12.3393612131895	-0.440873419344268	0.52000198099105	-0.847830268846333	0.396532503294007	0.995517635545774
PF3D7_0419700	4.8964570028752	-0.544757595411926	0.584597168166421	-0.931851238897631	0.351413410189433	0.995517635545774
PF3D7_1437300	8.18325953220232	-0.346720137980761	0.549389213225711	-0.631101102158544	0.527974420538282	0.995517635545774
PF3D7_1352700	8.58974890865235	0.885870991650574	0.544136875140234	1.62802969642936	0.103518589110587	0.995517635545774
PF3D7_1320500	5.56175582027837	0.796669363458145	0.574149344279106	1.38756470140784	0.165269636344172	0.995517635545774
PF3D7_0606600	15.439245477376	0.317830517065545	0.468427549277711	0.678505176639636	0.497451442715345	0.995517635545774
PF3D7_0213100	15.0314575439677	0.479293629796299	0.494658765795851	0.968937908186402	0.332576170124335	0.995517635545774
PF3D7_1137300	11.3618045125179	0.643231866304025	0.509955061883024	1.26135009608273	0.207182739608034	0.995517635545774
PF3D7_1423600	8.57911403751565	0.298218254616794	0.549346207300202	0.542860314049327	0.587225982176135	0.995517635545774
PF3D7_1227800	4.7610785818345	0.415703041080128	0.581565685231834	0.714799809611209	0.474732752840575	0.995517635545774
PF3D7_0913600	4.74801639305156	0.537384676480032	0.588953482218634	0.912439934060092	0.361537175656675	0.995517635545774
PF3D7_1100100	4.4266329526649	-0.515249250132308	0.584178428417853	-0.882006635417491	0.377773219017177	0.995517635545774
PF3D7_1358300	6.5834882235094	0.439202236120605	0.55963118125335	0.784806584824255	0.432566978769216	0.995517635545774
PF3D7_0829100	7.8311960179293	0.664209007702205	0.546641923831401	1.21507147319909	0.224338832612845	0.995517635545774
PF3D7_0921800	5.75673646084289	-0.624908625246396	0.572656984472506	-1.09124422156838	0.27516543418315	0.995517635545774
PF3D7_0519400	44.057448023373	-0.283118439471334	0.347318805158639	-0.815154363271575	0.414983956922162	0.995517635545774
PF3D7_0212400	20.2237784302129	0.450553905602116	0.467969619096609	0.962784521080422	0.335655670221379	0.995517635545774
PF3D7_1354500	5.05369104652286	0.295994636676718	0.575562882683975	0.514269848841591	0.607063338819009	0.995517635545774
PF3D7_1217300	5.66207373850104	-0.521876755200656	0.563350037489632	-0.926380971813216	0.354248029229131	0.995517635545774
PF3D7_1304200	6.311251739181	-0.650032548724684	0.578819788481053	-1.12303097036559	0.261424341350053	0.995517635545774
PF3D7_1443100	7.39757954871438	0.464676425784744	0.554903131372576	0.837400979582414	0.40236721531747	0.995517635545774
PF3D7_0615600	14.1853925878997	0.29369893034377	0.502217348103759	0.58480443069659	0.558679224825647	0.995517635545774
PF3D7_1228400	6.18733943774373	-0.438594735721045	0.564955941228816	-0.776334407187705	0.437551562545958	0.995517635545774
PF3D7_1009800	10.3150894295092	-0.30134441161795	0.514280772618361	-0.585953097339637	0.557907034102368	0.995517635545774
PF3D7_0306900	74.5802786259764	-0.417296872911411	0.330497979368519	-1.26263063304876	0.206721953656691	0.995517635545774
PF3D7_0418300	82.2521715667209	0.523466569380825	0.315958325946306	1.65675826966428	0.097568356994493	0.995517635545774
PF3D7_0927600	23.0711033316449	0.411790342004689	0.414759553953045	0.992841124646661	0.320787385146576	0.995517635545774
PF3D7_1037500	5.98204423476536	0.348433333813261	0.573128405257265	0.607949860131006	0.543220729002971	0.995517635545774
PF3D7_1477500	6.4902500597517	-0.367300875594652	0.566928869905184	-0.64787823498225	0.517063709016087	0.995517635545774
PF3D7_0312500	6.57651666531459	0.270121609423953	0.565153328587075	0.477961635825938	0.632677510858833	0.995517635545774
PF3D7_1202900	81.5081754325748	-0.334777910052931	0.326825753715098	-1.02433148626581	0.305678730881588	0.995517635545774
PF3D7_0628700	7.96884203645852	-0.515077755464126	0.575344977879031	-0.895250285077528	0.370653309574774	0.995517635545774
PF3D7_0719400	14.8510906905879	0.423144259365385	0.485869866889899	0.870900395766408	0.383808540690759	0.995517635545774
PF3D7_0108000	16.7750211412584	-0.247833760994913	0.45218520239609	-0.548080210678419	0.583636828086427	0.995517635545774
PF3D7_1436700	5.21619748583912	0.46739673975953	0.582400947589298	0.802534305093769	0.422243952657267	0.995517635545774
PF3D7_1430900	8.12587166754107	-0.346204775290928	0.536229956690255	-0.645627442054505	0.518520660858298	0.995517635545774
PF3D7_1435300	9.12486694051029	0.371858022513557	0.539163126243386	0.689694833369771	0.490386115650045	0.995517635545774
PF3D7_0705000	4.92864444314213	0.60274358347217	0.57760180461599	1.04352787448941	0.296703877815276	0.995517635545774
PF3D7_0935500	11.1244627848591	0.306245755376347	0.519255847825789	0.589778153984494	0.555339390665101	0.995517635545774
PF3D7_1434800	17.3356613426106	-0.50014909381747	0.45861273963387	-1.09056956031522	0.275462329748854	0.995517635545774
PF3D7_0619500	9.18875143723016	-0.402375309915058	0.523481244211455	-0.768652772882389	0.442099468091244	0.995517635545774
PF3D7_0915400	38.2145029609579	0.268039084345377	0.376643916756109	0.71165117082972	0.47668081160447	0.995517635545774
PF3D7_1363100	6.41903697009307	-0.240898076299789	0.57883225357641	-0.416179428170011	0.677278711946771	0.995517635545774
PF3D7_1011000	5.54669096120103	-0.440081388929527	0.580660313083686	-0.7578981704336	0.448511945648576	0.995517635545774
PF3D7_1037000	4.81852804641355	-0.282072504061749	0.574928408417605	-0.490621962546793	0.623693849835506	0.995517635545774
PF3D7_0413900	5.47742929049637	0.331317117339335	0.571668318860165	0.579561795552953	0.56221016284541	0.995517635545774
PF3D7_0317300	31.3676043823058	0.354630766134637	0.416042134017585	0.852391469849657	0.393996853004405	0.995517635545774
PF3D7_1127100	30.9397323213334	0.648503969377405	0.400377947548794	1.61972949146599	0.105290398161769	0.995517635545774
PF3D7_0827800	21.3572594401175	0.599084715902128	0.477200958413833	1.25541389919547	0.209328546278402	0.995517635545774
PF3D7_1364000	8.37238572926618	0.430986770578781	0.53511668832986	0.805407082189725	0.420584806214855	0.995517635545774
PF3D7_0410600	5.79160702074936	-0.683515278145326	0.576199033195197	-1.18624856823349	0.235524151122989	0.995517635545774
PF3D7_1440100	17.6306894778631	0.632167732273554	0.466798443326372	1.35426272583253	0.175652573459606	0.995517635545774
PF3D7_0615700	4.7116488000076	-0.381895072968407	0.582940014387348	-0.655118989163519	0.512391146971432	0.995517635545774
PF3D7_1205500	17.2890912562559	0.239706181727261	0.447267665420632	0.535934520332092	0.592003805661988	0.995517635545774
PF3D7_1439100	9.88216760042693	0.396182038520049	0.519920749027638	0.762004669482788	0.446057217250887	0.995517635545774
PF3D7_0420700	8.08131870144136	-0.870759495767511	0.559058902126469	-1.55754517539286	0.119341103670337	0.995517635545774
PF3D7_0615900	14.514664282984	0.585052436620667	0.483627772509061	1.20971637667832	0.226387743592105	0.995517635545774
PF3D7_1302800	22.7019213167479	0.538851062226929	0.433930203541673	1.24179201592539	0.214313309280106	0.995517635545774
PF3D7_0212500	42.8944566100599	0.248708461967579	0.381455027169995	0.651999434409714	0.514401537262611	0.995517635545774
PF3D7_0204700	37.4431505219381	0.183660286844876	0.379878045817455	0.483471705898822	0.628760844958283	0.995517635545774
PF3D7_1252100	52.7737112543727	-0.209713102167135	0.4535497781176	-0.462381666324527	0.643807644375985	0.995517635545774
PF3D7_1324500	4.55785085887993	-0.550154897303868	0.59125245843541	-0.930490671886091	0.352117091644467	0.995517635545774
PF3D7_0929100	10.6710068516297	-0.625716508450215	0.508670839476054	-1.23010100027499	0.218659285543202	0.995517635545774
PF3D7_1355800	7.91181541076943	0.467645079841663	0.550871033197716	0.848919350736343	0.395926170474691	0.995517635545774
PF3D7_1112500	5.43231776326089	-0.622437841977692	0.577060393149866	-1.07863552821592	0.280750236737289	0.995517635545774
PF3D7_1106000	7.4001290695064	0.80040509484286	0.553448417141921	1.44621444393365	0.148117063695125	0.995517635545774
PF3D7_0821600	6.55821621613332	-0.46905918405432	0.555013212399695	-0.845131563672623	0.398037387089959	0.995517635545774
PF3D7_0914900	9.04768721349705	0.308387549602173	0.550953964219723	0.559733788355477	0.575661031951972	0.995517635545774
PF3D7_0309500	35.0566420773093	-0.248107248003285	0.390929517050202	-0.634659797181353	0.525650319276399	0.995517635545774
PF3D7_0110600	17.0610763246207	0.729522781024347	0.48269863603869	1.5113421223048	0.130701307218252	0.995517635545774
PF3D7_1003600	25.9967247293218	-0.248838979819817	0.58198883232851	-0.427566588905536	0.668966695288693	0.995517635545774
PF3D7_1442400	15.9860456197487	0.292475210720413	0.468387078479398	0.624430570693632	0.532344853534303	0.995517635545774
PF3D7_1216000	7.4772313921579	0.736831715316547	0.565014993502159	1.30409232284157	0.192202106162431	0.995517635545774
PF3D7_0316700	17.1948242701383	-0.336891732092674	0.460767758727715	-0.731153006501385	0.464685700498263	0.995517635545774
PF3D7_1207100	7.68484927981925	0.485291909688962	0.546437265256687	0.888101783213847	0.374486003540769	0.995517635545774
PF3D7_0518500	7.3349849013995	0.403771181536127	0.567974060061887	0.710897222123369	0.477147927539317	0.995517635545774
PF3D7_0416500	4.90798279910772	0.888531395016893	0.581487456431616	1.52803192087667	0.126504612717535	0.995517635545774
PF3D7_0618200	5.98511739155657	-0.525263897354639	0.573610462616704	-0.915715335732341	0.359816219361118	0.995517635545774
PF3D7_1217200	4.7549057976719	0.475435622839721	0.581246601927403	0.817958541629637	0.413380860707031	0.995517635545774
PF3D7_0702400	52.8775136895559	-0.612103569572984	0.368435822056441	-1.66135737333167	0.0966416935203086	0.995517635545774
PF3D7_1444400	5.72319533399765	-0.403126420498932	0.577571986151527	-0.697967405214788	0.485197578474058	0.995517635545774
PF3D7_0502900	4.86294168976572	-0.741790539577751	0.582813660503043	-1.27277479895974	0.203097966242378	0.995517635545774
PF3D7_1232400	4.26338656688184	0.369499937866831	0.587968602687981	0.628434811276673	0.529719138564002	0.995517635545774
PF3D7_1359200	6.29522605678015	0.619417449215679	0.563936318308861	1.09838190786008	0.272037759171706	0.995517635545774
PF3D7_1248700	46.0824446424898	-0.406386462131725	0.377303868147998	-1.07708003134577	0.281444513219946	0.995517635545774
PF3D7_0309900	4.60083692623469	-0.321391846355556	0.579392745852506	-0.554704643190978	0.579096699746825	0.995517635545774
PF3D7_1132200	11.9568745167529	0.7100747707011	0.512913366403019	1.38439513807321	0.166237496850582	0.995517635545774
PF3D7_0313700	6.87803482886007	-0.324852123583624	0.556450349436537	-0.583793547640989	0.55935921986649	0.995517635545774
PF3D7_1311800	26.823221984968	-0.164784388180211	0.402648529299628	-0.409251186057575	0.68235533426894	0.995517635545774
PF3D7_0113000	23.2240472967191	-0.291450191059644	0.440114282127468	-0.662214799417104	0.50783357086993	0.995517635545774
PF3D7_0924500	7.16344387874311	0.810085004574931	0.566090687866787	1.43101630522769	0.152425542129276	0.995517635545774
PF3D7_0424100	4.50865357808011	-0.191934203447003	0.397599805347978	-0.48273213634756	0.629285942073188	0.995517635545774
PF3D7_1408600	55.617125242429	-0.292167640071773	0.336583583575266	-0.86803888938463	0.385373043418278	0.995517635545774
PF3D7_1310400	6.40322503154275	-0.224171415694647	0.555568445516372	-0.403499186290704	0.686581033224392	0.995517635545774
PF3D7_0813300	29.3241352684123	0.250409714021481	0.393187167318011	0.636871533040012	0.524208526678454	0.995517635545774
PF3D7_0707500	4.93898383702708	0.480183850866986	0.591488290866059	0.811823088101879	0.416893151950484	0.995517635545774
PF3D7_1019800	10.1840548604427	0.547909158037611	0.530131957556127	1.03353353863713	0.301354283583422	0.995517635545774
PF3D7_1361900	17.8678461233338	0.222178813178327	0.477938824866981	0.464868727164326	0.642025466911849	0.995517635545774
PF3D7_1136500	24.8442791144743	0.350137222094161	0.407200311949737	0.859864817926222	0.389863564127563	0.995517635545774
PF3D7_1141400	9.15307161906974	0.836150131595167	0.544650048409764	1.53520620081923	0.124733185675731	0.995517635545774
PF3D7_1408500	4.38024841109729	0.596527361745665	0.584052080648313	1.02135987784429	0.307083967052736	0.995517635545774
PF3D7_1417500	7.73979688111368	-0.465189440697786	0.553391262186747	-0.840615803833931	0.400563202240985	0.995517635545774
PF3D7_1355900	5.06157723013542	0.272723360693312	0.576304924581844	0.473227538166873	0.636050852909362	0.995517635545774
PF3D7_0627800	14.7665925584293	0.430224810510964	0.498686808620126	0.862715441985326	0.388293940042576	0.995517635545774
PF3D7_1372300	4.26097040958504	-0.658932876302606	0.587268776500775	-1.12202947384473	0.261849908304175	0.995517635545774
PF3D7_0301600	5.46350699905215	-0.849259167194345	0.57013410136761	-1.48957791712017	0.136335251982661	0.995517635545774
PF3D7_0106800	17.0657307034516	0.391052454137246	0.487513697047085	0.80213634305228	0.422474094145604	0.995517635545774
PF3D7_1324900	178.172533741874	-0.394245473857701	0.294221893222279	-1.33995967988642	0.180258453759606	0.995517635545774
PF3D7_1244700	6.83369337906394	0.275657095310914	0.564997454910296	0.487890862012254	0.625627147436852	0.995517635545774
PF3D7_1472700	5.59979939990901	-0.399257926943952	0.568527778877501	-0.702266347885841	0.482513075667474	0.995517635545774
PF3D7_0109500	6.19424864009353	-0.374745235761648	0.559731867488958	-0.669508487059728	0.503171168631285	0.995517635545774
PF3D7_0607700	17.8848125382165	0.682478851542732	0.478603647881724	1.42597920965156	0.153874343345929	0.995517635545774
PF3D7_0609000	39.4555003006751	0.296046376143311	0.372973476842281	0.793746457924407	0.427343048348875	0.995517635545774
PF3D7_0725100	16.8022749906673	0.254938490262034	0.481272617918919	0.529717421623567	0.596307867062841	0.995517635545774
PF3D7_1432300	8.11870210438624	-0.368738556267018	0.5342284106802	-0.690226406711552	0.490051819595564	0.995517635545774
PF3D7_0926500	8.80484004765328	0.793915968109262	0.537715791416518	1.47646020589767	0.139820390522675	0.995517635545774
PF3D7_0532300	15.5782287971186	-0.878486778413674	0.521534310808381	-1.68442758263021	0.0920990639060254	0.995517635545774
PF3D7_1317300	7.27260959376818	0.253679233990588	0.549617755063531	0.461555747887484	0.644399934806086	0.995517635545774
PF3D7_0729100	18.0210515236082	0.26511488322263	0.474777897228127	0.558397694522929	0.576572846780141	0.995517635545774
PF3D7_0516800	25.171553643495	0.63718086524033	0.442810826459241	1.43894599491908	0.150165824470481	0.995517635545774
PF3D7_0312300	6.166524768129	-0.815325481409414	0.562506000153656	-1.4494520612877	0.14721137873797	0.995517635545774
PF3D7_0621900	12.3578960264373	-0.2554324263267	0.510640613177301	-0.5002195668248	0.616920482207528	0.995517635545774
PF3D7_0602400	9.74156125331919	0.358202964670156	0.546213076807195	0.655793462075233	0.511957023617662	0.995517635545774
PF3D7_0805200	6.71552592595085	-0.39695079603547	0.589966017160009	-0.672836713453973	0.50105117812222	0.995517635545774
PF3D7_0519100	14.952525579061	-0.458112181416674	0.474367075483356	-0.965733511226261	0.334177546267296	0.995517635545774
PF3D7_1011900	10.6376934316475	0.39920386977402	0.51204138438825	0.779632041365094	0.435607490404229	0.995517635545774
PF3D7_1360700	19.4669352411735	-0.316780345064064	0.444777612695766	-0.71222187453204	0.476327393425295	0.995517635545774
PF3D7_1328000	6.54036895243752	0.315380857162225	0.573456948787293	0.549964313501075	0.582343850747927	0.995517635545774
PF3D7_0618500	6.81095991272609	-0.269612952119858	0.5577722716787	-0.48337460610657	0.628829775469197	0.995517635545774
PF3D7_0318500	7.53360862719781	-0.625808179663675	0.562861157211706	-1.11183401385129	0.266209524311502	0.995517635545774
PF3D7_1344200	22.6396944452622	0.480901978453981	0.432774794041397	1.11120607085999	0.266479658716956	0.995517635545774
PF3D7_1108500	7.07949917780226	-0.276806633406965	0.576797850335126	-0.479902331893466	0.631296843037995	0.995517635545774
PF3D7_0203100	6.967653767484	-0.580830857295606	0.569840971985379	-1.01928588123795	0.308067264846383	0.995517635545774
PF3D7_1428200	13.7006969452529	-0.536234501255882	0.482510548896847	-1.11134254470055	0.266420933084164	0.995517635545774
PF3D7_0413500	10.7015301910604	-0.528148672539685	0.505009585051509	-1.04581910556374	0.295644558467519	0.995517635545774
PF3D7_1419300	4.84364568252537	-0.349250543040215	0.584892755401911	-0.597118941574556	0.550427972454579	0.995517635545774
PF3D7_0505500	10.9907882757365	0.541936892754704	0.516993962533853	1.04824607641181	0.294525246745097	0.995517635545774
PF3D7_1248300	7.52937796576739	-0.931326167818416	0.56979365243792	-1.63449726727148	0.102154479579891	0.995517635545774
PF3D7_1112000	20.3914341581493	-0.679362666904463	0.447956477694399	-1.51658185724001	0.129372288871773	0.995517635545774
PF3D7_0624400	10.2228961627559	0.282768792710734	0.52879566527678	0.534741132120907	0.59282887471844	0.995517635545774
PF3D7_1334600	5.16701509377793	0.501592725307395	0.588160620846126	0.852815893362267	0.393761408806556	0.995517635545774
PF3D7_1356900	26.6710586275944	-0.659505802218185	0.413315764563746	-1.59564637684287	0.110567767021022	0.995517635545774
PF3D7_1009700	11.6759659974548	-0.396529212545128	0.541652457237018	-0.732073135175705	0.46412393004972	0.995517635545774
PF3D7_0809900	15.5434480700357	0.322732823836152	0.468192794095977	0.689316084967326	0.490624377884835	0.995517635545774
PF3D7_1241900	12.2341962567169	0.748085647022319	0.516503718223468	1.44836449502316	0.147515139005391	0.995517635545774
PF3D7_1426100	19.9189333185484	-0.393820786278098	0.444025496296416	-0.886932821567519	0.375115069620388	0.995517635545774
PF3D7_1363500	5.16981024201007	0.457343614476009	0.576822583156715	0.792867040629986	0.42785529198256	0.995517635545774
PF3D7_0934700	16.2150042464401	0.711633911488305	0.464425608999089	1.5322882668378	0.125451315195711	0.995517635545774
PF3D7_1111700	4.1686889982938	0.309236674475922	0.589395363342407	0.524667640278454	0.599814256445598	0.995517635545774
PF3D7_0602600	8.56631948063169	-0.750951704350846	0.536163668093638	-1.40060162416618	0.161333235005513	0.995517635545774
PF3D7_1239800	62.8672809192571	0.16150926609361	0.345803253070069	0.46705536937469	0.64046026425921	0.995517635545774
PF3D7_1438100	19.1821572993808	0.513999635741959	0.461001285293611	1.11496356331109	0.264866036112067	0.995517635545774
PF3D7_0731600	41.1814053745403	-0.218394469787683	0.369679035710336	-0.590767797714142	0.554676014274715	0.995517635545774
PF3D7_1114100	17.1919069768332	0.373024118364338	0.465135737498823	0.801968303640143	0.422571293418426	0.995517635545774
PF3D7_1471100	198.646705066891	-0.14022661310454	0.309752342705461	-0.452705577235552	0.650760762986923	0.995517635545774
PF3D7_0321000	5.53414953789123	0.824365673619416	0.574679895580309	1.4344780110795	0.151435899664982	0.995517635545774
PF3D7_1201900	9.11267374245525	-0.387082181782856	0.525061848121525	-0.737212545850914	0.460993105176907	0.995517635545774
PF3D7_1424400	66.4170094533019	-0.424231987322513	0.318909884116066	-1.3302566287601	0.183433731831866	0.995517635545774
PF3D7_0403700	12.8289032352445	0.416021843642494	0.495533220902065	0.839543800686403	0.401164220835853	0.995517635545774
PF3D7_1138800	13.0279828696073	0.324323496404283	0.514316234157298	0.630591598835459	0.528307593399072	0.995517635545774
PF3D7_1328500	9.5606186525603	0.555724051725268	0.539588014311227	1.02990436589782	0.303054901067915	0.995517635545774
PF3D7_1103100	70.381236076407	-0.377731469840824	0.347914991192029	-1.08570047110255	0.277611532204735	0.995517635545774
PF3D7_1315300	7.51865905279482	0.276163693952606	0.559022508336112	0.494011761305615	0.621297873281332	0.995517635545774
PF3D7_0202000	94.104647729838	-0.252889365576586	0.355697712194726	-0.71096708498969	0.477104632820867	0.995517635545774
PF3D7_1212400	7.97207960586621	0.333319027264587	0.560785089885799	0.594379260925903	0.552258476405227	0.995517635545774
PF3D7_1323400	28.6879890168801	-0.29156667859953	0.412354308117731	-0.707078046378226	0.47951797798057	0.995517635545774
PF3D7_1359900	13.4277669848743	0.476812211792283	0.50464582946097	0.944845243844743	0.34473788962284	0.995517635545774
PF3D7_1112100	13.5769382921222	0.460819561787443	0.487819703628583	0.944651391404852	0.344836880847448	0.995517635545774
PF3D7_1437200	36.2540562107182	0.561761221593661	0.378621516253748	1.48370126228425	0.137888191268069	0.995517635545774
PF3D7_1419800	13.1353570795533	0.618973137142488	0.502838645082703	1.23095776984421	0.218338659207756	0.995517635545774
PF3D7_0705500	32.3916813390343	0.390862516331235	0.390062171901953	1.00205183810924	0.31631855706076	0.995517635545774
PF3D7_1004500	14.7509875226142	0.710210738692492	0.482694340935721	1.47134672703169	0.141197372565269	0.995517635545774
PF3D7_0419500	6.96866259730904	-0.2280081214179	0.564263987653278	-0.404080583568986	0.686153462459419	0.995517635545774
PF3D7_0909400	13.2889378077482	0.615093456174344	0.49754136769138	1.2362659592074	0.216359720025289	0.995517635545774
PF3D7_1128900	6.87234017316467	-0.491264663498281	0.552546509796876	-0.889091967441576	0.373953655520037	0.995517635545774
PF3D7_0528000	4.58432045308676	0.429968364547457	0.581867951157951	0.738944916439881	0.459940446289684	0.995517635545774
PF3D7_1008500	22.1152393490483	0.382647209944127	0.427405769147066	0.895278532874603	0.370638212893427	0.995517635545774
PF3D7_1231800	18.9372157662914	0.39544851127728	0.479481021072899	0.824742782086378	0.409517637313532	0.995517635545774
PF3D7_0530200	10.6416761692212	0.313379623274585	0.512144118918276	0.611897338461075	0.540605682661599	0.995517635545774
PF3D7_0808200	9.29136532393492	-0.283374849445165	0.589481019146895	-0.480719209339884	0.630716076709774	0.995517635545774
PF3D7_1236700	6.9631409005678	-0.409123213305447	0.552452862029817	-0.740557686319608	0.458961672056539	0.995517635545774
PF3D7_0205900	27.0218320309791	0.384209566282298	0.414328580072561	0.92730645376916	0.353767444454141	0.995517635545774
PF3D7_1355700	20.643419375342	0.4949350650401	0.444190525449298	1.11424048169302	0.265176032895752	0.995517635545774
PF3D7_0918900	8.53950471451978	0.275161989657754	0.534102149677606	0.515186074094341	0.606422999367937	0.995517635545774
PF3D7_0216100	5.42815716863572	-0.38187474522325	0.572534589643335	-0.666989824075331	0.504778633356628	0.995517635545774
PF3D7_1147700	5.0545743953937	0.239397823340216	0.583615664968138	0.410197734074333	0.681660902960114	0.995517635545774
PF3D7_1143500	16.7679784714802	-0.474683555658721	0.492097359913235	-0.964613091487455	0.334738639764783	0.995517635545774
PF3D7_1227200	21.3536926848503	-0.188591750496303	0.42427593237467	-0.444502589248361	0.656679257271421	0.995517635545774
PF3D7_0315100	7.2975683489806	-0.795718339119881	0.553950663088718	-1.4364426150934	0.150876434286169	0.995517635545774
PF3D7_1010200	6.60294825690141	-0.642328211218444	0.55493518934777	-1.15748329453281	0.2470749606098	0.995517635545774
PF3D7_1008000	26.2809555575024	0.369837378015769	0.399701513700957	0.925283906461434	0.354818247842313	0.995517635545774
PF3D7_0923200	5.06838842610254	-0.427670161252626	0.588431907139378	-0.726796348164931	0.46735072050171	0.995517635545774
PF3D7_1022000	12.2026857964975	0.555904331744671	0.497071854505622	1.11835809391695	0.263414084553675	0.995517635545774
PF3D7_0522600	9.66458246978884	-0.406270608268313	0.519998201316131	-0.781292333781213	0.434630577981097	0.995517635545774
PF3D7_1414100	13.0188536592795	-0.22055786642835	0.484145755608256	-0.455560879907441	0.648705779658491	0.995517635545774
PF3D7_0817200	4.68118827053419	0.344075122638057	0.581220500729878	0.591987244438175	0.553859129989701	0.995517635545774
PF3D7_1331100	5.41237873064765	-0.668353134101606	0.578430003268624	-1.15546069589205	0.247901818949748	0.995517635545774
PF3D7_0314000	6.50568809586498	0.615241682851726	0.568829598564168	1.0815922455595	0.279433751677946	0.995517635545774
PF3D7_1228800	30.0236440958115	0.377853388658319	0.390757583242048	0.966976470484169	0.333555796335698	0.995517635545774
PF3D7_0318600	5.42234118054857	-0.470204146001199	0.584362038630702	-0.804645262555038	0.421024414864069	0.995517635545774
PF3D7_1420600	6.46203761347805	0.436432573620056	0.581435874524787	0.750611705851065	0.452886374215952	0.995517635545774
PF3D7_1120600	6.91372468592931	-0.783344715108126	0.556814974401513	-1.40683126553861	0.159477429095989	0.995517635545774
PF3D7_0530300	10.3614915862107	0.256740704559717	0.513344470107813	0.50013337926051	0.616981164157938	0.995517635545774
PF3D7_0105700	10.8664585641022	-0.30082648970171	0.51759216921632	-0.581203711325826	0.561103166649988	0.995517635545774
PF3D7_0729500	5.75493872522279	0.55668543681887	0.577424874396304	0.964082881605825	0.335004374362616	0.995517635545774
PF3D7_1222400	15.7798450195776	0.590249207910184	0.514213533551893	1.14786789805605	0.251023102306676	0.995517635545774
PF3D7_0510100	41.2149783655951	0.504758356561101	0.353657746014861	1.42725095731366	0.153507571212906	0.995517635545774
PF3D7_0213700	6.90289199265624	0.662695417864819	0.557753770915004	1.18815049296333	0.234774124266572	0.995517635545774
PF3D7_0503300	17.4505852224616	0.799008071199861	0.47668437434386	1.67617844050305	0.0937032458306679	0.995517635545774
PF3D7_1466200	5.59067250572717	0.41746889131979	0.579060990790189	0.720941140846166	0.470945729136317	0.995517635545774
PF3D7_1311400	14.5459762536049	-0.314427852574838	0.466436605965831	-0.674106295589226	0.500243737293806	0.995517635545774
PF3D7_0416700	18.0444321541728	-0.449523044962541	0.444653571662825	-1.01095116200575	0.312039805127219	0.995517635545774
PF3D7_0924400	19.3505029171489	0.612451394633094	0.466516078443605	1.31281947811179	0.189243784962534	0.995517635545774
PF3D7_0516600	10.9142623724637	0.355750093508262	0.53648981752711	0.663106888306012	0.507262099314271	0.995517635545774
PF3D7_0305100	12.2099135319076	0.239616656767786	0.492477550053628	0.486553461658695	0.62657481033563	0.995517635545774
PF3D7_0518600	6.66149801199533	0.39233468552059	0.572399992030426	0.685420494379978	0.49307861514793	0.995517635545774
PF3D7_0414100	4.28737910514142	-0.522299711375668	0.589408882307402	-0.886141568364194	0.375541245687784	0.995517635545774
PF3D7_0323600	4.68893168291912	0.81351455235234	0.586543650269693	1.38696336066086	0.165452935519526	0.995517635545774
PF3D7_1206700	46.1149803422999	0.468939519632842	0.376537815043346	1.24539820676141	0.212985412146791	0.995517635545774
PF3D7_1107500	4.32833323998594	0.396626678923768	0.585348587620785	0.677590562806176	0.4980313313686	0.995517635545774
PF3D7_0418500	9.48519499462319	-0.360597327685925	0.523876532089086	-0.688325026219356	0.49124812533617	0.995517635545774
PF3D7_1031500	10.390540018182	0.405279156618209	0.528207125106982	0.767273172500512	0.442919115459437	0.995517635545774
PF3D7_1457400	10.3690223194317	0.748917940864936	0.519199167061334	1.44244827106293	0.149175954644579	0.995517635545774
PF3D7_0930600	12.8886957928103	-0.393617757285709	0.495841715150218	-0.793837519633579	0.427290027077169	0.995517635545774
PF3D7_1144100	4.99972714285572	0.251195287540801	0.588917254613491	0.426537489898578	0.669716236152123	0.995517635545774
PF3D7_0801700	7.64792103042075	-0.414608716488997	0.544559526873193	-0.761365279696123	0.446438919519483	0.995517635545774
PF3D7_0802100	20.812945554467	0.238854603334938	0.452071673871023	0.528355606290616	0.597252543682464	0.995517635545774
PF3D7_1113200	7.52416222949371	-0.519391027567237	0.553182750886784	-0.938913996748132	0.347774902318007	0.995517635545774
PF3D7_1339700	11.2742287456441	0.220391610916024	0.504682701666247	0.43669341189699	0.662333707726043	0.995517635545774
PF3D7_0815600	12.8897860553099	-0.242318819575107	0.505263971824686	-0.479588557838407	0.631519984059558	0.995517635545774
PF3D7_0206300	5.82808804391472	0.304156021467817	0.57594342421279	0.528100519393104	0.597429570363916	0.995517635545774
PF3D7_1133700	5.70003891708013	0.779716351421131	0.577842328525083	1.34935831615403	0.177221902819898	0.995517635545774
PF3D7_1434300	14.3217019836075	0.665845350689219	0.482442599942975	1.38015455262019	0.167539063682328	0.995517635545774
PF3D7_1460300	28.7529081147352	-0.457309660563506	0.39735826802736	-1.15087490901792	0.249783701544958	0.995517635545774
PF3D7_1361100	20.8622035619872	-0.248653980808037	0.45156919842124	-0.550644246058793	0.581877571430968	0.995517635545774
PF3D7_1234600	7.36049951880244	0.398919754716587	0.552118788275926	0.722525230416943	0.469971619052529	0.995517635545774
PF3D7_1461600	6.96902061431764	0.600561238001229	0.564806471285527	1.06330445654123	0.28764390482514	0.995517635545774
PF3D7_0918300	13.3730838699986	-0.669067008884991	0.475553397661776	-1.40692299156034	0.159450225120247	0.995517635545774
PF3D7_0820200	13.2021853618488	0.545278350658711	0.486871027301066	1.11996467253642	0.262728816768332	0.995517635545774
PF3D7_1012000	8.84704236535882	0.495156942006931	0.534969560838395	0.925579655842343	0.354664469986605	0.995517635545774
PF3D7_1140400	6.29868747659474	-0.470399185152685	0.573789802280063	-0.819810988768822	0.412323865667568	0.995517635545774
PF3D7_0820300	16.4989951606784	0.366878560267003	0.469447277426823	0.781511743508176	0.434501572491972	0.995517635545774
PF3D7_0921700	8.90567081583855	0.33988183821139	0.549912607996017	0.618065185757391	0.536532370106918	0.995517635545774
PF3D7_1333800	10.6860775910689	0.25079158418517	0.521008347848361	0.481358091901749	0.630262016324764	0.995517635545774
PF3D7_0220700	4.32256356372225	-0.572764076751661	0.58993509229179	-0.970893381722008	0.331601374220641	0.995517635545774
PF3D7_1214900	9.13715312654066	-0.267115673023303	0.550580680445599	-0.485152644308404	0.627568071025575	0.995517635545774
PF3D7_0529100	4.53640161087132	0.944809447738075	0.587765727970904	1.60745923550147	0.107953664835656	0.995517635545774
PF3D7_1441300	8.51403754008949	-0.237150021950288	0.563888851309611	-0.420561643308811	0.674075207434432	0.995517635545774
PF3D7_1236200	17.9621595967365	0.469984624395286	0.5188540331362	0.905812799708766	0.365034945020234	0.995517635545774
PF3D7_1135100	7.29700440301496	0.63582320876315	0.569666276696305	1.11613278646318	0.264365299804303	0.995517635545774
PF3D7_1038000	77.6773098114201	-0.164971005476411	0.313016739430115	-0.527035729069191	0.598168777171897	0.995517635545774
PF3D7_0727400	17.7711587089527	-0.280949152473989	0.471244968323688	-0.596184938532885	0.551051686217582	0.995517635545774
PF3D7_0924700	7.92263235425843	0.22385399483691	0.557656212390554	0.401419350960506	0.688111404679822	0.995517635545774
PF3D7_1420000	6.25984138011753	0.773104169971239	0.567205131988735	1.36300630295883	0.172880524181919	0.995517635545774
PF3D7_1447000	63.2073278581741	-0.217861598529864	0.321947531389972	-0.676699080714398	0.498596899870865	0.995517635545774
PF3D7_1468400	4.4920330825432	-0.341969074026198	0.588103859451077	-0.581477350523399	0.5609187789363	0.995517635545774
PF3D7_1029900	37.0505111550902	0.566437266373852	0.412415489752151	1.37346263767703	0.169608568659958	0.995517635545774
PF3D7_0424500	4.22898655921758	-0.381056709453328	0.590853813570696	-0.644925530987936	0.518975445719018	0.995517635545774
PF3D7_1216200	10.6569694813803	0.353384730568329	0.508138953589906	0.695449006756386	0.486773957586881	0.995517635545774
PF3D7_0730900	15.450279157995	-0.42801460729895	0.51220997690298	-0.835623331444834	0.403366838922619	0.995517635545774
PF3D7_1347300	13.2666882571998	-0.345915792196912	0.481711838712683	-0.718096929320505	0.472697523387633	0.995517635545774
PF3D7_0704700	8.69069776547868	0.479553515837257	0.538151282347479	0.891112836794495	0.372868638948217	0.995517635545774
PF3D7_0815500	6.79835875694234	0.353655245995926	0.556975663238112	0.634956371235085	0.52545687007747	0.995517635545774
PF3D7_1036800	7.2508146541887	0.969699611734136	0.565373559087134	1.71514849986943	0.0863180041825787	0.995517635545774
PF3D7_1466100	11.7857066711325	0.834708981137604	0.525148662933508	1.58947178209476	0.111953919806467	0.995517635545774
PF3D7_1415400	19.0371618957667	-0.5429378509107	0.445309549468015	-1.21923693655192	0.222754276465609	0.995517635545774
PF3D7_1109900	66.2646302940539	-0.163312101882908	0.334942435853947	-0.487582594503257	0.625845526642698	0.995517635545774
PF3D7_1219000	19.902440871671	-0.238906500428429	0.443869582507445	-0.538235801333429	0.590414266434268	0.995517635545774
PF3D7_1401800	25.3181503642157	0.289763444220554	0.440102601075412	0.65839975385854	0.510281293521141	0.995517635545774
PF3D7_1233900	9.82797846438325	-0.605532346408802	0.546816037650491	-1.10737854180466	0.268130299419896	0.995517635545774
PF3D7_0820700	7.56965811716012	0.77050482964521	0.55754029212926	1.38197156424809	0.166980432399375	0.995517635545774
PF3D7_0708900	7.12413135563739	-0.319063070909926	0.563698851165262	-0.566016890491027	0.571382298561912	0.995517635545774
PF3D7_0823800	24.6226008018432	0.688024917370078	0.424662348152417	1.62016934245166	0.10519590508177	0.995517635545774
PF3D7_0925400	4.42184130792544	0.489600197929848	0.584322928007466	0.837893182797701	0.402090697848344	0.995517635545774
PF3D7_1475600	10.9763870648705	-0.548240382688903	0.551030858719402	-0.994935898804317	0.319767441675569	0.995517635545774
PF3D7_1115800	14.915496359714	-0.798659445782695	0.476679624670415	-1.67546377996522	0.0938432718344648	0.995517635545774
PF3D7_1344900	6.90335923206273	0.637511184462928	0.565775448189835	1.12679188625559	0.259830481810093	0.995517635545774
PF3D7_1318800	20.0069453877465	-0.582310315074527	0.455150777018234	-1.27937893216252	0.200763649105227	0.995517635545774
PF3D7_1134600	6.70734511170683	-0.27747610045333	0.566525560260698	-0.489785668850748	0.62428557282203	0.995517635545774
PF3D7_0813900	17.4366239820692	-0.749314289058127	0.464303799664243	-1.61384483521347	0.10656108673681	0.995517635545774
PF3D7_1140200	17.6513758361952	-0.362052584070794	0.463412969807551	-0.78127417154757	0.434641257750593	0.995517635545774
PF3D7_0526500	9.21477372540433	-0.224716167614678	0.532426717374316	-0.422060276619616	0.672981021470852	0.995517635545774
PF3D7_1445500	9.72781574344299	-0.412663211551763	0.516230098312111	-0.799378441708505	0.424071007065951	0.995517635545774
PF3D7_1412900	13.3005908725793	0.633977358673289	0.487300733422149	1.30099816230745	0.193259083754595	0.995517635545774
PF3D7_0827600	8.92925622238757	-0.360292080758982	0.526165072989951	-0.684751039653032	0.493501035504565	0.995517635545774
PF3D7_0522400	41.6841461428002	0.249835969690917	0.403448679348783	0.619250929496617	0.535751065418487	0.995517635545774
PF3D7_1205900	9.80643807415281	0.306620277271267	0.518798329858548	0.591020170313325	0.554506906309369	0.995517635545774
PF3D7_1019000	35.0213844211811	0.181373714631704	0.389914689896907	0.465162558198714	0.641815049389246	0.995517635545774
PF3D7_0904000	25.01857937443	0.389305673355918	0.415216063111842	0.937597814589016	0.348451134909786	0.995517635545774
PF3D7_1123100	17.8687467954476	0.395618322678039	0.485451902612741	0.814948547011125	0.415101762785155	0.995517635545774
PF3D7_1306500	5.08988937956394	-0.38058645017836	0.589591868888997	-0.64550830881627	0.518597835599881	0.995517635545774
PF3D7_1008400	30.9062093541967	-0.412378136539047	0.397959738520144	-1.03623079578985	0.300094482918298	0.995517635545774
PF3D7_1453400	10.4354651549193	0.376468880489567	0.510233486795345	0.737836481204084	0.460613821581449	0.995517635545774
PF3D7_1435500	18.9872442146702	0.664072003665287	0.483912929454396	1.37229646749471	0.169971164880392	0.995517635545774
PF3D7_1231100	17.6637814795961	0.614017027286185	0.506887357986326	1.2113480788423	0.225762029476114	0.995517635545774
PF3D7_1124000	7.57780746445621	0.653586678797669	0.549997298577589	1.18834525276394	0.234697416025214	0.995517635545774
PF3D7_1413700	5.35446092055578	-0.588562031845173	0.57509383698967	-1.02341912569608	0.306109720327094	0.995517635545774
PF3D7_0619300	6.34795634146452	-0.336524083605461	0.557647906378379	-0.603470540741383	0.546195707489443	0.995517635545774
PF3D7_0304200	5.93376067007037	0.660314767090819	0.579384678561681	1.13968282476859	0.254418465158886	0.995517635545774
PF3D7_0310600	8.42134311763488	-0.562488309253592	0.546179278632682	-1.02986021487622	0.303075629285648	0.995517635545774
PF3D7_0316400	4.92206868672498	0.664913328332673	0.590418100946587	1.12617368482886	0.260092009784939	0.995517635545774
PF3D7_0615500	14.5875613270531	0.418889645856255	0.488464857308847	0.857563527014184	0.391133522098273	0.995517635545774
PF3D7_1120000	14.2366260198268	0.635694741611342	0.518739318313645	1.22546088019297	0.22040162082547	0.995517635545774
PF3D7_1303500	22.1017943491596	0.687675470246288	0.471758890754599	1.45768417664863	0.14492761541254	0.995517635545774
PF3D7_0608900	111.917518666144	0.333113457290393	0.32982245194717	1.00997811193202	0.312505776779845	0.995517635545774
PF3D7_1474800	29.6010372503222	-0.187306338032931	0.398442474532864	-0.470096312529254	0.638286208573442	0.995517635545774
PF3D7_0916500	7.26335586205463	0.229251518864159	0.55189545137172	0.415389397202607	0.677856867196566	0.995517635545774
PF3D7_1307900	4.56914218802178	-0.596884718916802	0.588935733967405	-1.01349720265036	0.310822731610336	0.995517635545774
PF3D7_1002800	5.29165160279149	0.596179925180992	0.576982714386409	1.03327172602562	0.301476754939156	0.995517635545774
PF3D7_1008100	36.0903816373671	-0.161183160746102	0.39776611402768	-0.405220945328906	0.685315110253393	0.995517635545774
PF3D7_0317600	35.0819125827549	-0.643906414364012	0.415803041729155	-1.5485851466749	0.121481478794915	0.995517635545774
PF3D7_1325900	13.893066672065	0.206035590713249	0.49719667725037	0.414394544735657	0.678585183466931	0.995517635545774
PF3D7_0216700	8.15667979989228	-0.53938216989506	0.548100802916388	-0.984093011769118	0.325069782609817	0.995517635545774
PF3D7_1315800	6.00578059580967	0.309637001428664	0.568569311101887	0.544589719111971	0.586035727178744	0.995517635545774
PF3D7_1470700	8.54418724837196	-0.496166328858591	0.539373738785175	-0.919893374816692	0.357628481361162	0.995517635545774
PF3D7_0302100	6.36533191087534	-0.325562538586347	0.554477082336762	-0.587152380066479	0.557101371151586	0.995517635545774
PF3D7_0631000	4.40500622282683	0.283057153612123	0.591256411414146	0.478738408831994	0.632124737862581	0.995517635545774
PF3D7_0627700	49.4695255889392	0.383424572481653	0.344580037402131	1.11273007970044	0.265824372765767	0.995517635545774
PF3D7_1474700	6.34613520094497	0.279582837005893	0.578631417744663	0.483179496363377	0.628968292388318	0.995517635545774
PF3D7_0831400	9.12497052212387	-0.374953695625715	0.546754169912039	-0.685781135763513	0.492851133748832	0.995517635545774
PF3D7_1012100	6.39477530889763	-0.777896184402841	0.585552125085811	-1.32848324013655	0.184018516685756	0.995517635545774
PF3D7_1402800	28.6014548715488	0.479364861039747	0.396908998396742	1.20774500698164	0.227145360331533	0.995517635545774
PF3D7_0906000	4.2729725586222	-0.413068237477318	0.58547728691662	-0.705523931855182	0.480484244095118	0.995517635545774
PF3D7_1407400	4.33857913712334	-0.545611011175055	0.587394536175656	-0.928866336972352	0.352958360503662	0.995517635545774
PF3D7_0703500	48.5842018512761	0.213067017747827	0.358691118139733	0.594012527694716	0.552503733973298	0.995517635545774
PF3D7_1105700	6.08717184283993	0.336352602615099	0.572172357358437	0.587851891636196	0.556631709949502	0.995517635545774
PF3D7_0703700	8.85098281610574	-0.70289783223441	0.544409398264411	-1.29111994479754	0.196662089069999	0.995517635545774
PF3D7_1457900	23.6623057983305	0.251857600737073	0.432322682215037	0.58256855607636	0.560183778104144	0.995517635545774
PF3D7_1447800	5.91314365523653	0.45804285224177	0.568448569843363	0.805777121346236	0.420371372107029	0.995517635545774
PF3D7_1343000	415.019307574565	-0.272239909123167	0.261517392861397	-1.04100115921335	0.297875010231835	0.995517635545774
PF3D7_0417800	5.62830869325209	0.552582819060073	0.578305745904164	0.955520194937932	0.339314697668299	0.995517635545774
PF3D7_0923400	10.2053373800382	-0.342255803734438	0.530454044359577	-0.645212921597473	0.518789213610452	0.995517635545774
PF3D7_1330400	34.3296518740183	-0.312118115335857	0.421876627210779	-0.73983267904509	0.459401527384097	0.995517635545774
PF3D7_1409600	9.19801862462151	0.694826812481252	0.528323072246679	1.31515515596644	0.188457762863707	0.995517635545774
PF3D7_0613900	18.4826098623189	-0.706733517825548	0.529532143547016	-1.3346376163146	0.181994980267561	0.995517635545774
PF3D7_1039700	9.76537496406538	-0.929416210603147	0.542796024991126	-1.71227527065686	0.0868459517307222	0.995517635545774
PF3D7_1417400	8.07596523857526	-0.834427357352444	0.568356176290971	-1.4681416199219	0.14206575825987	0.995517635545774
PF3D7_0730200	6.00959796154782	0.507464306575216	0.57417318478456	0.88381749622394	0.376794739988859	0.995517635545774
PF3D7_1443700	6.44906132108394	0.483840445098946	0.568322036723943	0.851349083502048	0.394575466709809	0.995517635545774
PF3D7_0823200	81.2117116904277	-0.202915922146446	0.308450426498361	-0.657855865041329	0.510630752917803	0.995517635545774
PF3D7_1323800	6.48523497153844	0.292246963389345	0.561023382624553	0.520917616699271	0.602424162648491	0.995517635545774
PF3D7_0802600	10.335144965502	-0.770562703184896	0.536736842180286	-1.4356433965941	0.151103839450785	0.995517635545774
PF3D7_1441500	9.4219004153855	0.810131393243649	0.526534394460535	1.53861058606376	0.123899392602817	0.995517635545774
PF3D7_1014600	32.5085467682833	-0.355272614048552	0.379954948230042	-0.935038787370795	0.34976831061453	0.995517635545774
PF3D7_1309400	9.18903598299559	0.7829959834145	0.541165585825899	1.44686950523569	0.147933475414169	0.995517635545774
PF3D7_1439300	13.8535737832668	0.715534255552242	0.520360574579347	1.37507392086857	0.169108528584721	0.995517635545774
PF3D7_0605100	19.3524479916441	0.281213209304142	0.497597098613486	0.565142381432125	0.571976923658229	0.995517635545774
PF3D7_1020900	81.9456370567007	-0.31155341919552	0.351592139289768	-0.886121685839939	0.375551958443825	0.995517635545774
PF3D7_0202600	7.76897718435839	-0.283237470000411	0.539335978994288	-0.525159605573821	0.599472243133553	0.995517635545774
PF3D7_0420300	46.4491571716215	-0.180989324202786	0.445248758935153	-0.406490350777476	0.68438234542745	0.995517635545774
PF3D7_0319100	7.01789661593263	-0.326715019459752	0.555991740194048	-0.587625671103898	0.556783576251021	0.995517635545774
PF3D7_1317400	5.21413782919531	0.583528829134542	0.582843431071156	1.00117595571443	0.316741748764892	0.995517635545774
PF3D7_0703200	13.4751925035679	0.854581150927292	0.512703572022188	1.6668133353483	0.0955515277503814	0.995517635545774
PF3D7_1118300	16.8761338885921	-0.574234290338753	0.456216017870379	-1.25868945377956	0.208142522153882	0.995517635545774
PF3D7_1246700	8.52432992098042	0.429525954859822	0.550654692960826	0.780027774847963	0.435374526793643	0.995517635545774
PF3D7_1306400	21.2241608030425	0.425116518973661	0.433502324057661	0.980655685982239	0.326762563596961	0.995517635545774
PF3D7_1328300	21.9625097907122	0.527584744358892	0.434219984543089	1.21501718746097	0.224359536134782	0.995517635545774
PF3D7_0910200	24.8178031891093	0.432480940108512	0.43526900401718	0.99359461876923	0.320420265064168	0.995517635545774
PF3D7_1229800	12.1456111086411	-0.311068111817013	0.56117038140973	-0.554320260159796	0.579359687153072	0.995517635545774
PF3D7_0608500	33.8405826053456	-0.30963188393643	0.429711051785665	-0.720558344147199	0.47118129076801	0.995517635545774
PF3D7_0931200	11.6254159084081	-0.265420959264805	0.501970171303392	-0.528758429162485	0.596973038922308	0.995517635545774
PF3D7_0703000	4.44163953646284	-0.460019600292587	0.582833100472123	-0.789281871465346	0.429947279771523	0.995517635545774
PF3D7_0704600	52.1543905290489	0.330124243368995	0.342994782081324	0.962475992683533	0.335810556944119	0.995517635545774
PF3D7_1325700	4.24845649587405	0.71337663558528	0.586176895843973	1.21699889682306	0.223604635589978	0.995517635545774
PF3D7_1236400	10.905144027063	-0.723331771334277	0.508586995681073	-1.42223803887402	0.154957159464469	0.995517635545774
PF3D7_1249900	5.99693752408629	-0.562670833749906	0.56361402254019	-0.998326534201486	0.318121044962103	0.995517635545774
PF3D7_0931800	29.5548767628027	-0.368927217442276	0.404197951109341	-0.912738959783782	0.361379848332952	0.995517635545774
PF3D7_1438900	36.830238694682	-0.337033876669601	0.389387057032491	-0.865549767468205	0.38673711274414	0.995517635545774
PF3D7_0831600	23.0078132217108	-0.217516043727484	0.490711931993608	-0.443266261824497	0.657573155931895	0.995517635545774
PF3D7_0419400	11.9524103828275	0.687405641601294	0.521812845133397	1.31734135717867	0.187724228264038	0.995517635545774
PF3D7_0612100	8.93199268840723	0.409601152783837	0.553167590159778	0.74046484297015	0.459017986094105	0.995517635545774
PF3D7_1245500	6.86868168832592	0.341251969022128	0.562672674507332	0.606483990573956	0.544193410116637	0.995517635545774
PF3D7_0531100	9.3268781399501	-0.295601732852848	0.537523380878791	-0.549932790587774	0.582365472538526	0.995517635545774
PF3D7_0107800	6.82950535572766	-0.950818214251762	0.557646840561553	-1.70505442708917	0.0881842740357896	0.995517635545774
PF3D7_0805500	17.3567504699053	-0.240334020511732	0.464954365086871	-0.516898084109457	0.6052273051267	0.995517635545774
[truncated: 3,443 more rows]
