# Supplementary material for: Differential Gene Expression of Malaria Parasite in Response to Red Blood Cell-Specific Glycolytic Intermediate 2,3-Diphosphoglycerate (2,3-DPG)
Source: Preprints.org preprint supplement (doi:10.20944/preprints202311.0790.v1), 2023-11-13
Supplement: Supplementary file 2 [file ijms_Balau et al_Table S2.xlsx]

## Sheet: Table S2
GeneID	Base mean	log2(FC)	StdErr	Wald-Stats	P-value	P-adj
PF3D7_0112300	969.146712906224	-2.1679261032465	0.200140344100297	-10.8320294590884	2.42715369078211e-27	4.76935700238685e-24
PF3D7_1148600	989.974771630073	-2.1546266159155	0.20172587812034	-10.6809628788933	1.2496865766822e-26	1.22781706159026e-23
PF3D7_0725600	34671.975073714	-1.85273540170002	0.177511372963958	-10.4372771770302	1.67547525575329e-25	6.58461775511043e-23
PF3D7_0531600	34408.720115514	-1.8678432643394	0.178694655011758	-10.4527091994805	1.42398311423415e-25	6.58461775511043e-23
PF3D7_1371000	955.847178017191	-2.10930138316862	0.201878438715058	-10.4483737668776	1.49059169919284e-25	6.58461775511043e-23
PF3D7_1102800	104.158104977195	-2.82829232141104	0.321059028087177	-8.80925958775119	1.25975154074562e-18	4.1256862959419e-16
PF3D7_0112700	10924.5451744532	-1.42135316526633	0.191685641745809	-7.41502155467214	1.21605027575721e-13	3.41362684551845e-11
PF3D7_0731500	38.6816117692064	-3.1809594710719	0.439258346634852	-7.2416597099205	4.43226809167686e-13	1.08867585001813e-10
PF3D7_0531800	915.759304372472	-1.70829882199039	0.24313469300068	-7.02614176902188	2.12322733495438e-12	4.26974226844486e-10
PF3D7_0725800	913.045507210121	-1.70376825459544	0.242601364868335	-7.02291289877992	2.17289682872512e-12	4.26974226844486e-10
PF3D7_0726000	167299.662835069	-1.09625980554566	0.159867822967262	-6.85728863506291	7.01797472270388e-12	1.25366548455574e-09
PF3D7_0532000	166867.598233174	-1.09359913587526	0.159830228063813	-6.84225474194182	7.79562994268837e-12	1.27653440311522e-09
PF3D7_0725400	32.8454443343752	-3.03968641671705	0.470989142601783	-6.45383543222583	1.09054233753314e-10	1.6483966871174e-08
PF3D7_1335400	35.1550213448222	-2.62460278085051	0.436402734268651	-6.01417583977554	1.80804171573657e-09	2.36853464761491e-07
PF3D7_1035200	208.378577569397	-1.80273173494667	0.299313397555399	-6.02289022031833	1.71329656976754e-09	2.36853464761491e-07
PF3D7_1310700	29.3933945034123	-2.99379599824874	0.501029455806219	-5.97528940375642	2.29682073826271e-09	2.82078296917889e-07
PF3D7_1014100	13.2493981560527	-3.8771388914207	0.659631505758392	-5.87773454963021	4.15919163056952e-09	4.80753620827594e-07
PF3D7_0830200	642.541292307914	-1.1723216343404	0.201106030877268	-5.82937085092115	5.56367362466213e-09	6.07367704025616e-07
PF3D7_1035300	18.8262104201117	-3.27824159242017	0.571179540828422	-5.73942404811191	9.49990764501564e-09	9.82490448550302e-07
PF3D7_1035500	24.0295516567418	-2.83923115366203	0.503900207344828	-5.63451078661512	1.75555973322146e-08	1.72483743789008e-06
PF3D7_1418800	78.9329370097185	-2.58920974001105	0.460909541479443	-5.61760932893712	1.93617662805315e-08	1.81170813053545e-06
PF3D7_0202500	40.3648003134714	-2.67005465049817	0.476574759504573	-5.60259350132988	2.11168057564099e-08	1.88611469597024e-06
PF3D7_API05900	347.650583085682	-1.34906114815225	0.242457397912421	-5.56411625204172	2.63484259595259e-08	2.25107204393341e-06
PF3D7_API05700	346.885755130325	-1.32378568820543	0.24703772677753	-5.35863774927612	8.38517917011198e-08	6.86536544552918e-06
PF3D7_0525800	31.9530228656265	-2.57130856001688	0.483208478671857	-5.32132334905289	1.03015112520073e-07	8.09698784407776e-06
PF3D7_MIT04000	118.518747918149	-1.9038668735587	0.364360449254635	-5.2252292405869	1.73939476156581e-07	1.31458104095262e-05
PF3D7_MIT03200	51.8851538765696	-2.41137093514357	0.463374883075289	-5.20393103557962	1.95116439889249e-07	1.36929930136562e-05
PF3D7_1001500	16.9063864396982	-3.04811323844953	0.585568244342648	-5.20539368023843	1.93585759082548e-07	1.36929930136562e-05
PF3D7_1301600	20.4477672371148	-2.74048062954708	0.54561370624481	-5.02274887558903	5.09371276260747e-07	3.45142950983575e-05
PF3D7_0302200	35.9559738498554	-2.34693227607326	0.475461241883754	-4.93611690991853	7.96933462923198e-07	5.21991418214694e-05
PF3D7_0918500	367.665039833569	-1.26926953820653	0.25800819081876	-4.91949319197444	8.67685861609711e-07	5.50000876794543e-05
PF3D7_1335300	32.1238243470983	-2.14516282709447	0.442075792102614	-4.85247748331024	1.21928630971465e-06	7.27241162372676e-05
PF3D7_1370300	22.808758343352	-2.45438811931816	0.505835493195949	-4.85214689821575	1.22132103604572e-06	7.27241162372676e-05
PF3D7_1038400	9.24891009173827	-3.33988288667218	0.691081809722872	-4.83283287113503	1.34603783915547e-06	7.7793069233544e-05
PF3D7_1251200	14.4576865971615	-2.87705299398017	0.610018789453344	-4.71633504364412	2.40130884008411e-06	0.000134816339164722
PF3D7_0831800	33.9166541012301	-2.15282545321613	0.457744927191893	-4.70311154822179	2.56226338029884e-06	0.000139856876174645
PF3D7_1302100	59.9141311334968	1.86038840076485	0.397729139749988	4.67752602168976	2.90356737390335e-06	0.000154202969992435
PF3D7_0501600	53.8479943728256	-1.84634420276389	0.407020529478419	-4.53624343010389	5.72650791530608e-06	0.000296120738252012
PF3D7_1342600	24.2412908966934	-2.16476561885265	0.497295657849179	-4.35307564963535	1.34240801683207e-05	0.00067636711617308
PF3D7_0302500	94.9674561123364	-1.46040101611165	0.339277969273576	-4.3044380961089	1.67410093416313e-05	0.000822402083907639
PF3D7_0801100	137.705107568957	-1.1396288370774	0.2661245244914	-4.28231422585117	1.8495953656995e-05	0.000886452413073052
PF3D7_1148620	92.4959308500768	-1.55554770203662	0.37027316495082	-4.20108138877208	2.65643063735733e-05	0.00124283004819218
PF3D7_1035900	20.0406615981675	-2.22461074019446	0.530935837070837	-4.18998037967751	2.7897857609687e-05	0.00127486721402407
PF3D7_1371200	92.3259552025728	-1.54553804535594	0.372145108344986	-4.15305215814686	3.28069923947351e-05	0.00146513045581033
PF3D7_1125800	9.20395636532498	-2.81673705321592	0.680117780601486	-4.14154302909834	3.44977136578791e-05	0.00150640016306072
PF3D7_1239200	49.7896171029568	1.50312334402859	0.377563310956807	3.98111601527021	6.85924583651631e-05	0.00293009088451186
PF3D7_1016900	57.6479656666511	1.47884285180955	0.374085206508776	3.95322462925264	7.71049892752159e-05	0.00322364476437871
PF3D7_1126700	14.119857472462	-2.40590410526714	0.610221938997923	-3.94267061131561	8.05792893808594e-05	0.00329871465902893
PF3D7_MIT01400	42.2947367991524	-1.55754571578524	0.399392414899498	-3.8997879220545	9.62769837789113e-05	0.00386090353317471
PF3D7_1026600	17.8362238677952	-2.13491920250539	0.563267672266891	-3.79023918399813	0.000150502290546034	0.00572763883298416
PF3D7_0613900	17.1884963311141	-2.05077629176199	0.540440526038845	-3.79463824963894	0.000147858876791682	0.00572763883298416
PF3D7_0707300	71.4212657863826	-1.38260365791617	0.364949332250734	-3.78848112802209	0.000151571103977189	0.00572763883298416
PF3D7_MIT02300	23.2694278882113	-1.88808645942064	0.499161885142594	-3.78251327999788	0.000155252807519485	0.00575607107124129
PF3D7_MIT02100	133.362187448465	-1.2438272679527	0.332479865486176	-3.74106042822739	0.000183245451418368	0.00666809837105726
PF3D7_1332200	15.1765751202847	-2.08993748728037	0.563667968218421	-3.70774570335442	0.000209112487846922	0.00747101888398547
PF3D7_0818100	11.6536421856617	-2.31780737624744	0.626743647035964	-3.69817450437506	0.000217155584495557	0.0076198343488173
PF3D7_1371300	4256.22347072019	-0.591079280338746	0.161461883946556	-3.66079761917303	0.000251431305688128	0.00866776343293283
PF3D7_1423300	13.082939031421	-2.30662098136303	0.633914672293748	-3.63869315883917	0.000274025058633461	0.00928378000370259
PF3D7_0102500	21.854005319001	-1.78695926369775	0.49406073920757	-3.61688173515643	0.000298173454170769	0.00993069216009424
PF3D7_1149200	10.7410405032015	-2.31485868272064	0.646035782473564	-3.5831740988981	0.000339444201510513	0.0111167975994693
PF3D7_0402300	8.95198564606672	-2.31714413428635	0.657280343115801	-3.52535133380386	0.000422921483868345	0.0135148313857879
PF3D7_0104900	22.6492775885316	-1.9548668189911	0.554860633869658	-3.52316725978134	0.000426422160772953	0.0135148313857879
PF3D7_1411000	10.3931333234522	-2.19678355576577	0.629957162463412	-3.48719514065904	0.000488115062162346	0.0152245412245875
PF3D7_1017500	11.7474291080104	-2.14697083383086	0.622751923853184	-3.44755391608716	0.000565687487998222	0.0173683736549454
PF3D7_1328700	8.61684900823975	-2.52112840295688	0.732285209337359	-3.44282305693192	0.000575675834206318	0.0174031232956218
PF3D7_1003600	21.9790867340934	-2.05050131157193	0.601029709057192	-3.4116471792858	0.00064571631794479	0.0192247358297199
PF3D7_1010300	38.8443075687103	-1.34571143022855	0.406644360147815	-3.30930799025315	0.000935268919047084	0.0274299018795152
PF3D7_MIT01100	7.97256846270508	-2.24952813981056	0.682142155508002	-3.29774097912964	0.000974659997583508	0.0281648072831117
PF3D7_1410400	57.7767339495264	-1.3530905627266	0.418678236945483	-3.23181489584515	0.00123006709491807	0.035030171616145
PF3D7_1012400	535.464516563653	-0.63278395723224	0.198781292622085	-3.18331744846465	0.00145597890694038	0.0408714078876836
PF3D7_0730800	12.5167397057918	-1.9500982562587	0.623976284069064	-3.12527624213816	0.00177638156869873	0.0491632363731409
PF3D7_1401400	40.1144101865573	-1.24234285088117	0.398683061391504	-3.11611646239767	0.00183249884647445	0.0500119476850318
PF3D7_0828800	10.7259785626983	-2.14802143971134	0.699261681637574	-3.07184205300793	0.00212742262951716	0.0564916955000165
PF3D7_MIT01500	14.673957881036	-2.01339638916736	0.654766013296757	-3.07498609927825	0.00210512364913271	0.0564916955000165
PF3D7_0709050	44.6200520785245	-1.29668668889581	0.423122621442523	-3.06456479323914	0.00217986950467038	0.0571125810223639
PF3D7_1426000	96.2431893551437	-0.928009983485331	0.303329666653421	-3.05941055394907	0.00221773000951524	0.057339993009177
PF3D7_1351700	11.851906565865	-1.90313440091481	0.62729429049153	-3.03387808523423	0.00241431974415652	0.0616121856787996
PF3D7_API06700	1181.65542636618	-0.807107878205578	0.267931429684298	-3.01236730291996	0.00259218739537851	0.0653031824604972
PF3D7_0217800	34.3491322483087	-1.22474443765959	0.409738365923416	-2.98908898828503	0.0027981062461389	0.0695984654894043
PF3D7_0936300	9.09758752938353	-1.94496184640381	0.652857058977699	-2.97915419563572	0.00289045281963302	0.0709967473822361
PF3D7_0706300	12.9723911690825	-1.76157510293123	0.593316434675977	-2.96903136332851	0.00298740103646121	0.0724721362548923
PF3D7_0218800	555.595538985434	-1.62638198624895	0.549273847887064	-2.96096745276566	0.00306674345608711	0.0734896450147703
PF3D7_API04900	1158.60290181953	-0.792466160735848	0.26822470812284	-2.95448605865541	0.00313190303590423	0.0741468610307446
PF3D7_0822900	14.2870914547087	-1.89440094934462	0.642697796811242	-2.94757654179573	0.00320275453390938	0.07492157927538
PF3D7_0618300	56.9519561037526	-1.05237085285562	0.35917167832939	-2.92999397321775	0.00338968578042369	0.0783615595121477
PF3D7_0817700	26.4108276578157	-1.3366181777154	0.458641084635069	-2.91430101334886	0.0035648599077216	0.0814529037054994
PF3D7_0301700	42.2729583011759	1.16587395305685	0.401713615680483	2.90225152334435	0.00370490941074265	0.0827289430921512
PF3D7_1006200	155.961683530212	-0.805261346612259	0.277155510591897	-2.90544952504294	0.00366725992460941	0.0827289430921512
PF3D7_0316800	27.7874092323678	-1.29587587876277	0.451201101648011	-2.87205832173189	0.00407807697499713	0.0900384410771839
PF3D7_1344300	30.5700253010393	-1.25436505236044	0.439274336457681	-2.85553912044047	0.00429638295698389	0.0928470709006176
PF3D7_1148640	3847.1702537782	-0.477680779590534	0.167296908702302	-2.85528754413835	0.0042997880162627	0.0928470709006176
PF3D7_1356800	16.6895648430102	-1.50176442063	0.53115355340008	-2.82736397227646	0.00469329502217193	0.0991647819200844
PF3D7_1449200	49.811384927569	-1.22789180359174	0.434043818478537	-2.82895816347735	0.0046699803311452	0.0991647819200844
PF3D7_0400400	14.2650596072642	-1.67263365119416	0.594129757271942	-2.81526658229402	0.00487367870320185	0.10188062395523
PF3D7_0501500	16.4371279443542	-1.71106699967666	0.60951481257561	-2.80726073324823	0.00499647822114756	0.103348207416368
PF3D7_1401600	20.6380862653941	-1.42807407834457	0.513692673423601	-2.78001644217915	0.00543561461983579	0.111260236749764
PF3D7_0818200	243.978544308999	-0.656297057712169	0.2369318878332	-2.76998197124991	0.0056059395553014	0.113563620888322
PF3D7_1455300	15.8949886515493	-1.53305378831397	0.554550778659097	-2.764496683281	0.00570106867458825	0.114312244342509
PF3D7_1335100	39.725644087608	-1.15572119303398	0.418692563896524	-2.7603098136694	0.00577465699045388	0.114618191780221
PF3D7_0935900	13.134148176835	-1.65130604276026	0.599659626673707	-2.75373890338424	0.0058918751159942	0.115775346029286
PF3D7_0312800	68.8014973615566	-0.90160853064678	0.329772765331591	-2.734029687807	0.00625644031361405	0.121721833824273
PF3D7_1204900	9.65999876466956	-1.80512153940117	0.665418477852805	-2.71276136669062	0.00667251382646975	0.128544016362873
PF3D7_1402500	96.2744642247165	-0.88039560845764	0.326612522165494	-2.6955353781921	0.00702756146121717	0.13278036799319
PF3D7_1229800	9.95097236065175	-1.69304949586141	0.627435455373134	-2.69836439965694	0.00696811194137538	0.13278036799319
PF3D7_0515400	7.77129916714124	-1.90954345460317	0.710281445787686	-2.68843212212243	0.00717884292251583	0.134346917549939
PF3D7_0628300	73.2883967277105	-0.935518902451013	0.348562895541149	-2.68393140640689	0.00727620330420647	0.134884334837412
PF3D7_0702400	55.0547500366899	-0.94005789925844	0.351286123240701	-2.67604621152175	0.00744963726034343	0.13680875903341
PF3D7_1308400	51.9439024424058	0.963388265291245	0.362846133620779	2.65508758678991	0.00792878187429895	0.14425978132405
PF3D7_1361800	23.3570195978545	-1.29987190699857	0.491492479490235	-2.64474424582603	0.00817526819955067	0.147379834973551
PF3D7_1404800	15.4179764705881	-1.51453535265628	0.57501438519138	-2.63390863195918	0.00844081985377557	0.150783736478809
PF3D7_1353200	9.37262574736426	-1.6777315119061	0.650330507971981	-2.57981363528218	0.00988536473277125	0.174997672972032
PF3D7_0929400	87.2739965793699	-0.801167659152331	0.31189981905619	-2.56866984269714	0.0102089670672341	0.179112681134956
PF3D7_0320900	242.961492599384	-0.576950972126401	0.22539820456424	-2.55969639705789	0.0104763641691178	0.18090807870733
PF3D7_1460700	45.665788395737	-0.997978447958911	0.389977860342123	-2.55906437120147	0.0104954305204252	0.18090807870733
PF3D7_0613800	42.7573298269315	1.08873588384091	0.428677579573419	2.53975466812219	0.0110930251419601	0.189546038295232
PF3D7_1252800	22.1944411249904	1.2409728878255	0.490041769297242	2.53238186125471	0.0113290538852176	0.19191026624528
PF3D7_0935390	15.7820885740522	1.41364613567206	0.560876172082767	2.52042466062091	0.011721332733344	0.193549737991772
PF3D7_1474500	16.1670020583434	1.38203008974138	0.547251102683173	2.52540393790946	0.0115565371287867	0.193549737991772
PF3D7_1372200	9.83485680311249	-1.5746516887839	0.624143395168951	-2.5229005080758	0.0116391325983932	0.193549737991772
PF3D7_1136300	11.8544672381798	1.51237265757715	0.604270380189785	2.5028078607827	0.0123212414045523	0.201760327999544
PF3D7_0714000	168.721886938986	-0.644299252499907	0.260808781647461	-2.47038941108515	0.0134966042469314	0.215616482481465
PF3D7_1105000	2350.48886663052	-0.583525467497094	0.23588894229834	-2.47372963654685	0.0133710842020562	0.215616482481465
PF3D7_0307900	8.18383972529095	-1.66692193533883	0.67472230266664	-2.47053036301129	0.0134912865435882	0.215616482481465
PF3D7_1246400	19.4987714895782	-1.26373886127669	0.51346014153421	-2.46122095767875	0.0138465061121575	0.219422455728947
PF3D7_1436300	27.8592687164178	-1.08985883535837	0.44341822364573	-2.45785756480121	0.0139768595960212	0.219716232849454
PF3D7_API04400	8.45932736526416	-1.63533497252228	0.670862812187912	-2.43765929905833	0.0147826993033698	0.230539715326362
PF3D7_1228600	99.9821596028954	-0.827167457733916	0.340749103731996	-2.42749709001287	0.0152034088125331	0.235233845012816
PF3D7_0817300	29.8624375311301	1.18073474792151	0.489212466213863	2.41354182377958	0.0157983146149489	0.242528814206051
PF3D7_0423300	13.9345680118528	-1.53166571624173	0.636676135328157	-2.40572189100865	0.016140546757444	0.245861816886647
PF3D7_1246200	140.779052283506	-0.629278860576583	0.261907706875118	-2.40267408731364	0.0162756856417381	0.246013248353964
PF3D7_1203700	51.0070685842175	0.880154901658768	0.366996275276581	2.39826657912387	0.0164728718228286	0.247093077342429
PF3D7_0632500	10.3884561548688	-1.58905335954847	0.66779622942814	-2.37954826565768	0.0173338728329596	0.253808507981395
PF3D7_0217500	31.4957776876678	-1.08179783013547	0.454505071560856	-2.38016668641425	0.017304808348014	0.253808507981395
PF3D7_1136400	21.6970950880081	1.27331696459949	0.536147075523377	2.37493968116212	0.017551818183765	0.253808507981395
PF3D7_0102200	13.4958100783388	-1.51836379532685	0.637345302771288	-2.38232523049082	0.017203695961951	0.253808507981395
PF3D7_0613300	12.0643149742433	-1.39775477442174	0.58861919990306	-2.37463333620776	0.0175663903742848	0.253808507981395
PF3D7_0403600	14.2719846700836	1.3953080948447	0.589860920782984	2.36548658451989	0.0180063956526581	0.257631513879451
PF3D7_1021700	55.0373725392149	-0.877293478414984	0.371151822582401	-2.36370516062928	0.0180932055548928	0.257631513879451
PF3D7_0930300	210.046007133582	-0.73748943585448	0.314155171208303	-2.34753237713054	0.0188982306146739	0.267158439984419
PF3D7_1324900	187.607284435163	-0.587566785860224	0.251511171573388	-2.33614587449361	0.0194836401014258	0.271748597470703
PF3D7_0818700	21.5782284490575	1.186335570964	0.507883649661737	2.33584123401911	0.0194995176811039	0.271748597470703
PF3D7_0531500	85.2889075951034	-0.849643704740741	0.365203363368127	-2.32649474228499	0.0199921726306234	0.274717616917308
PF3D7_0905400	91.2266060085436	-0.849825120076087	0.364944665501635	-2.32864102536739	0.0198780907781973	0.274717616917308
PF3D7_0914100	8.89131870762434	-1.57765560892879	0.681029059175991	-2.31657605159708	0.0205268371830881	0.278232928689111
PF3D7_0631400	19.1137894268451	-1.21070993723813	0.522647028036293	-2.31649635852145	0.0205311830330387	0.278232928689111
PF3D7_0112500	10.5273854319604	-1.54740980529754	0.669058363824073	-2.3128173698527	0.0207326823679165	0.279039183924356
PF3D7_0803500	12.354455721765	-1.46753241963594	0.635320599466589	-2.3099084475902	0.0208932232882638	0.279286964363527
PF3D7_1035400	28.8718488922616	-1.00878720289173	0.438726185924927	-2.29935489436309	0.0214847950314943	0.283339746556284
PF3D7_1319400	19.4994573778322	1.23561521418885	0.536864404259413	2.3015405834055	0.021361094198785	0.283339746556284
PF3D7_0628100	44.9106328947503	-1.02100413116609	0.44705397538268	-2.28384979753755	0.0223803598966453	0.291291426249712
PF3D7_1033900	24.0777332797505	1.11241423563359	0.487092571227195	2.28378403068422	0.0223842266481967	0.291291426249712
PF3D7_1252400	9.62044542962956	-1.42827723549722	0.626236726082123	-2.28073055445477	0.0225643959682286	0.291704197878744
PF3D7_1028700	17.5023693142096	-1.24992302567943	0.550313141337596	-2.27129416288581	0.0231291763583013	0.297051186562498
PF3D7_0601200	19.3461487229674	-1.13423022717053	0.504089669386924	-2.25005648012979	0.024445360218583	0.311916446944906
PF3D7_1404900	51.6438265631149	0.797189480863615	0.360644520885433	2.21045776296948	0.0270734087487728	0.343220956073151
PF3D7_0406200	70.8705365498007	0.811774500604045	0.368477848124656	2.20304831005587	0.0275913438266127	0.34754481166214
PF3D7_1135900	28.0943275620952	0.996637213431196	0.45329066241625	2.19867139578534	0.0279012962832705	0.347631784807939
PF3D7_1124800	16.314130743464	1.30348158803826	0.593296909184893	2.1970139534842	0.0280194496838686	0.347631784807939
PF3D7_0219400	31.4121870722886	-0.963882044752117	0.439066930137729	-2.19529638556418	0.0281423440189949	0.347631784807939
PF3D7_1366900	17.2054749957807	1.16344095066474	0.530519849338659	2.1930205855918	0.0283058959640052	0.347631784807939
PF3D7_1331800	36.1022415090755	-0.880690465701369	0.402404275981348	-2.18857134048494	0.0286280107716161	0.349403982398917
PF3D7_1018200	13.9247008907765	-1.26303224359696	0.577858031934484	-2.18571374593294	0.028836554587383	0.349776726939554
PF3D7_0403800	22.0721625413237	-1.0763848057196	0.49347568026019	-2.18123171774557	0.0291662819565263	0.351605791684504
PF3D7_1431700	56.4710661736259	-0.754338970897316	0.34708697851655	-2.17334275725745	0.0297545296723006	0.355371122761617
PF3D7_1463900	17.9419146680701	-1.19036529398763	0.547998997807814	-2.17220341414766	0.0298403232853266	0.355371122761617
PF3D7_1019400	29.72708225642	-1.04568269995121	0.484775853639658	-2.15704369782511	0.03100225981704	0.364787069104693
PF3D7_API00100	8.58223524720246	-1.38911562497514	0.643950302898147	-2.1571783082069	0.0309917739405522	0.364787069104693
PF3D7_0930200	24.2572024251856	-1.04652035919343	0.489197118401816	-2.13926108684442	0.0324145293233112	0.364942965734404
PF3D7_0216500	8.79665654980942	-1.42262329607246	0.664888908479757	-2.13964058947116	0.0323838237173421	0.364942965734404
PF3D7_1327300	19.5599139149722	-1.25431550016707	0.584189514934951	-2.14710375332009	0.0317850225706764	0.364942965734404
PF3D7_0932200	65.7683627357801	-0.765862854783002	0.358010856861098	-2.13921684246616	0.0324181107645213	0.364942965734404
PF3D7_1103800	23.0742293770352	1.10140717182422	0.51675952822904	2.1313727404288	0.0330584467688162	0.364942965734404
PF3D7_0504800	30.6065509502947	1.04952282878534	0.488125455542869	2.15010878221483	0.031546611106117	0.364942965734404
PF3D7_0706000	22.218975986294	1.08311459323861	0.507640849609423	2.1336237894802	0.0328735890201906	0.364942965734404
PF3D7_0936800	8.1436657786388	-1.43252568451185	0.66916391095469	-2.14076949019572	0.0322926314906953	0.364942965734404
PF3D7_0422400	55.661037105608	-0.785296160835628	0.366515127138942	-2.14260231757891	0.0321450449137973	0.364942965734404
PF3D7_0208400	25.284747254804	1.03740892619985	0.486277385010948	2.13336864550363	0.0328944970565899	0.364942965734404
PF3D7_1356900	28.1597593584395	-0.937283538096207	0.438639343900027	-2.13679769298084	0.032614449868131	0.364942965734404
PF3D7_0802600	10.6162479080783	-1.31690570497902	0.620925385132729	-2.12087593213396	0.0339322445529193	0.372496427634002
PF3D7_1309120	191.462355726331	-1.27885760540642	0.604350652062502	-2.116085423325	0.0343375429989617	0.374851511071998
PF3D7_1303600	7.78034122132235	-1.4145263241716	0.672247188538263	-2.10417588691943	0.0353631071155163	0.38073100489789
PF3D7_1437900	21.0962666015903	1.04574606020257	0.49724127318021	2.10309585428074	0.035457391295834	0.38073100489789
PF3D7_0831600	20.3543985410426	-1.05080717654593	0.498690439746169	-2.10713318883913	0.0351060361954982	0.38073100489789
PF3D7_0503300	19.7785523161633	1.088386002049	0.520361919389654	2.09159425679265	0.0364748267271939	0.389527361515956
PF3D7_1144000	31.7165759254172	-0.885284725706856	0.425172283588276	-2.08217882462945	0.0373261387067757	0.396464121939536
PF3D7_1102700	7.93849014081206	-1.38543069266133	0.666085126616337	-2.07996040941376	0.0375291643531865	0.396477462118342
PF3D7_1236100	15.8610264740507	1.1776907206219	0.568352412834887	2.07211352327633	0.0382548554646857	0.401982839508596
PF3D7_0207000	44.0809175956112	-0.786810724669956	0.380728899151387	-2.06659049634449	0.0387727570813296	0.403113585528109
PF3D7_0425800	13.7876318736672	-1.37245280584981	0.663562177758834	-2.06831078058915	0.0386108086767047	0.403113585528109
PF3D7_1007900	8.70955336524121	1.34280606574501	0.651330608612539	2.06163513274073	0.0392424865606443	0.405849926798243
PF3D7_0935800	26.0934078008158	-1.09661690537212	0.533571303645252	-2.05523966127911	0.0398558620795211	0.410035439718634
PF3D7_0902800	21.805875263818	0.997052320304439	0.487756670241275	2.04415927271939	0.0409378151650298	0.418972952079602
PF3D7_0722200	15.3376880165064	-1.17481291621584	0.577004952361595	-2.03605343664297	0.0417449896984478	0.419551438020572
PF3D7_0701600	9.97077156743339	-1.25745567639458	0.617059210652875	-2.03782012274663	0.041567925185245	0.419551438020572
PF3D7_0830100	13.1434844161436	1.20047759294077	0.591135671278252	2.03079876797977	0.0422754120753554	0.419551438020572
PF3D7_1028000	9.78261832173178	-1.3684046667833	0.672783554941714	-2.033944879794	0.0419571532563857	0.419551438020572
PF3D7_1128000	16.1410055689089	1.12218709295892	0.552457818130134	2.03126294195114	0.0422283284667063	0.419551438020572
PF3D7_1134300	13.4520324374212	1.19911787709219	0.590062446475532	2.0321880917089	0.0421346179804825	0.419551438020572
PF3D7_0322900	48.2195180012779	-0.743749228064676	0.367023163046169	-2.0264367564483	0.042720047508456	0.420428009959502
PF3D7_1338700	16.5423390573724	1.08584316430632	0.536575113598422	2.02365547113124	0.0430056132324987	0.420428009959502
PF3D7_1472800	7.99676046687724	1.35997894745116	0.671568362667489	2.02507893917052	0.0428592591259491	0.420428009959502
PF3D7_0401800	8.90322067898244	-1.28173904943991	0.635007915089547	-2.01846153249785	0.0435432165488644	0.423576339200587
PF3D7_1105400	84.3315092551828	-0.601975988654715	0.298729021680358	-2.01512389144043	0.0438916694995318	0.42486271215064
PF3D7_0525000	36.5311071494279	0.813404836783043	0.405910515699484	2.00390185847082	0.0450805744419914	0.425615235307425
PF3D7_0821000	19.7943183025132	1.02049114684735	0.50896591449638	2.00502846611471	0.0449600039201922	0.425615235307425
PF3D7_0808400	12.4350599771568	-1.16432733818266	0.579277883149797	-2.00996339071619	0.0444350636714768	0.425615235307425
PF3D7_0617900	653.50429252474	0.379374141589946	0.189864267784803	1.99813343509131	0.0457021957505682	0.425615235307425
PF3D7_0629700	70.7165298506843	0.717543537559226	0.358518516534424	2.0014127707971	0.0453479255460005	0.425615235307425
PF3D7_1139100	10.7019401942465	1.2677314054257	0.6343236149533	1.99855621884585	0.0456563914275528	0.425615235307425
PF3D7_1436200	12.193828350219	-1.19727967372722	0.598826985194597	-1.99937495024235	0.0455678001777724	0.425615235307425
PF3D7_1414500	42.6540742536123	-0.746189750549471	0.372751750034384	-2.00184103892373	0.0453018306143834	0.425615235307425
PF3D7_1113000	11.9958348561819	-1.26687231371481	0.634808103465593	-1.9956776020952	0.0459690265804575	0.426080835993391
PF3D7_1366300	23.7085603753223	1.08596264676034	0.544792399068528	1.99335131807472	0.0462229906467112	0.426423364416843
PF3D7_0417400	46.4838476140901	0.831911815571275	0.417941130324549	1.99049998961638	0.0465358851357113	0.427303805101274
PF3D7_0726400	22.6431303771372	0.975520251507079	0.491283884758496	1.98565489683551	0.0470716563596982	0.430213045333985
PF3D7_0918100	15.0018804122848	-1.08781594520148	0.549012552561141	-1.981404505465	0.0475459289129857	0.430831577784597
PF3D7_1356300	21.0618345148001	-1.00579370943583	0.507821836796275	-1.98060350413669	0.0476357556703747	0.430831577784597
PF3D7_0420300	42.7786200661812	-0.833597140956312	0.421185633685988	-1.97916803016552	0.047797091072286	0.430831577784597
PF3D7_0903400	16.6409570675489	1.07801181057697	0.547856653506409	1.96768954739792	0.0491037692360297	0.438585938858174
PF3D7_0913700	11.9258831980667	1.18927102214347	0.604009431805979	1.96896101206163	0.0489575683758322	0.438585938858174
PF3D7_0906500	15.4456025363834	-1.08646480635639	0.556610409655316	-1.9519304481373	0.0509464627347034	0.450967711482715
PF3D7_1020900	83.2275251209616	-0.630715710110565	0.323127640216612	-1.95190887937584	0.0509490238927037	0.450967711482715
PF3D7_1141400	10.759086014862	1.20556778159678	0.619922359178038	1.94470769403327	0.0518101689975427	0.45653355192902
PF3D7_0316300	33.7102616132703	0.827229297020998	0.425821471610103	1.94266694418462	0.0520564126552784	0.456655584230456
PF3D7_0404300	10.930343474628	1.1816462661798	0.609297880443221	1.93935725711082	0.0524578513565099	0.458131901846853
PF3D7_0812100	14.9611073550138	1.10804652709711	0.57286491152926	1.93421957742042	0.0530861363161403	0.461567512660247
PF3D7_0306900	78.4866887956562	-0.608605880304317	0.315755098922594	-1.92746176508622	0.0539221086232946	0.466770675968167
PF3D7_1321100	13.9439990407406	-1.16238078838954	0.609952801791719	-1.90568972709868	0.0566904729077797	0.486456271801769
PF3D7_1316900	25.4010916979966	0.876681987856815	0.460035573335	1.90568303555606	0.0566913415992901	0.486456271801769
PF3D7_1143100	8.38994840321782	-1.25470486503796	0.6609168453512	-1.89843075397969	0.0576393615691657	0.492440632536568
PF3D7_1015900	89.8227199709812	-0.5630534841113	0.297135055464802	-1.89494128597694	0.0581001806906497	0.494228809771111
PF3D7_0524900	8.12521791584515	-1.28647127892546	0.680265304357207	-1.8911316962447	0.0586067663410318	0.494536622357115
PF3D7_1410700	28.3204299729628	0.878581252902972	0.464640262369993	1.89088489323243	0.0586397114550675	0.494536622357115
PF3D7_0312400	38.2790971837024	0.762457050493263	0.405151174544848	1.88190754068482	0.0598485704283824	0.502574533725519
PF3D7_0609900	10.1330130379775	-1.23364171611486	0.657591309606414	-1.87600063761978	0.0606551923408968	0.507180650850477
PF3D7_1352700	9.71867662081463	1.18723153024125	0.633629685651446	1.87369935015061	0.0609718755605223	0.507668370662823
PF3D7_0501300	14.0274116153865	-1.12242653442923	0.602340806021965	-1.86344096765097	0.0624002506955092	0.515195347128889
PF3D7_1468200	13.728318434928	1.07150265527897	0.57455329915404	1.86493169016109	0.0621909797652217	0.515195347128889
PF3D7_1414300	58.4013918750042	-0.641756627081852	0.344938043588785	-1.86049825181625	0.0628150655599512	0.516450225210477
PF3D7_1035700	15.0537364204816	-1.06837325863883	0.576827835210016	-1.85215274545454	0.0640038921961438	0.524031867355928
PF3D7_0912500	10.7775594475216	1.14825831794007	0.621422188452051	1.84779098538525	0.0646325855076218	0.526983529138908
PF3D7_1033200	50.6781874380471	0.66484017747228	0.363079054124147	1.83111685986973	0.0670831025503436	0.540238920128792
PF3D7_1304100	20.343361194722	-0.904953897316264	0.493753946620555	-1.8328033699986	0.0668318178261509	0.540238920128792
PF3D7_1011200	8.56146110840809	-1.23790830333152	0.675867970231746	-1.83158302783169	0.0670135673320105	0.540238920128792
PF3D7_1007700	17.8604771949259	0.984513218202357	0.53835954587074	1.8287280791316	0.0674403538472022	0.540899164529602
PF3D7_1476300	13.9010748025819	-1.11433637781882	0.615942381991118	-1.8091568471333	0.0704266395663625	0.542359186401196
PF3D7_0521300	9.5856577677539	1.17667730639349	0.650583592212685	1.80864891226587	0.0705055644912954	0.542359186401196
PF3D7_1250300	9.41939170302719	1.15799069231434	0.636895090329949	1.81818121994696	0.0690364393994026	0.542359186401196
PF3D7_1365900	62.4279439991318	-0.627663605656499	0.346299087555232	-1.81248992045465	0.0699105299821995	0.542359186401196
PF3D7_1004200	25.0015068824976	0.886964030475026	0.489315173401784	1.81266406334538	0.069883650395285	0.542359186401196
PF3D7_1033100	80.5994651542913	0.546860180353533	0.302305916872376	1.808962874466	0.0704567712466602	0.542359186401196
PF3D7_0114100	14.4286690158223	-1.01182718504404	0.559742334059114	-1.80766599822193	0.070658499602395	0.542359186401196
PF3D7_0802200	40.1205432970113	0.787249871231501	0.435450368636877	1.80789804747643	0.0706223697165937	0.542359186401196
PF3D7_1207200	9.38331843858543	1.18549122845642	0.655141257849566	1.80952002984466	0.0703702512538496	0.542359186401196
PF3D7_1422500	9.98235497148351	1.1712116825818	0.641928033837276	1.82452178569084	0.068073225833926	0.542359186401196
PF3D7_0719600	36.9634787692234	-0.784055003311681	0.43028940201252	-1.82215736582066	0.068431111496602	0.542359186401196
PF3D7_1248900	20.2482494515354	-0.893772550029374	0.495167702954593	-1.80498959180166	0.0710763107610801	0.543443387725768
PF3D7_1006100	36.0568134123739	-0.726880219160226	0.403251178827927	-1.80254952080474	0.0714589908316668	0.544251616217927
PF3D7_0826100	55.1540920849188	0.621799658114194	0.345436443685512	1.80004070062823	0.0718542118191757	0.54514874990224
PF3D7_0210600	9.67619801434445	-1.17636966552742	0.654653879623453	-1.79693377239901	0.0723461343200729	0.546769822842089
PF3D7_0516200	48.7869818638385	-0.734745748158393	0.409924489588943	-1.7923929084968	0.0730700499572364	0.550125088758504
PF3D7_1351400	35.7275837709765	-0.717895229110718	0.401591409058228	-1.78762596240356	0.0738363739072614	0.553772804304461
PF3D7_1407800	76.964804198006	0.632617071320532	0.354281405000403	1.78563442052459	0.0741584699338633	0.554073739239701
PF3D7_1435600	14.3786722595446	-0.993466872244877	0.557573191528163	-1.78176943823652	0.0747868380061529	0.556336952462046
PF3D7_0602600	8.95018695003363	-1.12448035316502	0.631625714365179	-1.78029539898512	0.0750276297213446	0.556336952462046
PF3D7_1302800	25.9468293133195	0.809768142846539	0.455515608033669	1.77769571133265	0.0754538444373437	0.557394001200678
PF3D7_0931100	16.9241368839693	0.943188512208856	0.532183473744851	1.77229951462389	0.0763448517768734	0.561863796784855
PF3D7_1133400	10.0183659596826	-1.10437556141435	0.626441727905755	-1.76293422391636	0.0779115840416406	0.570251558295458
PF3D7_1147900	15.829175722474	-0.952229037850688	0.540748237325144	-1.76094709538207	0.0782473577605968	0.570251558295458
PF3D7_0418300	85.1882434265323	0.558582367841521	0.317320364743714	1.760310493443	0.0783551759489942	0.570251558295458
PF3D7_1139800	14.4683810087394	1.00954379304589	0.576786356824133	1.75029069446889	0.0800681658061832	0.574654157115912
PF3D7_0302900	31.8273591145216	0.743527579388238	0.42381224925848	1.75437963553235	0.0793654784031934	0.574654157115912
PF3D7_1241900	13.8186758048403	1.02885387936127	0.587939045409529	1.74993290102824	0.0801298926461883	0.574654157115912
PF3D7_1323100	60.0601535540028	-0.585581069597322	0.334185536531977	-1.75226335548274	0.0797285340189256	0.574654157115912
PF3D7_1226900	18.0405895467975	0.903379511687134	0.516822850153914	1.7479480859217	0.0804730172315681	0.57501628676375
PF3D7_1039000	8.52638116797308	-1.11941189623051	0.641699604147397	-1.74444847557266	0.0810809184430587	0.577260886741342
PF3D7_1105600	13.3371423137308	-1.03217285084991	0.595486979576743	-1.73332564144988	0.0830378057491687	0.581386897115607
PF3D7_1121300	21.3329818303027	1.05401237785022	0.607098568021232	1.73614703339798	0.0825378398600282	0.581386897115607
PF3D7_1140100	31.8551153831182	-0.744758270667027	0.429670170389945	-1.73332551801565	0.0830378276759398	0.581386897115607
PF3D7_0921600	14.3249956123735	1.04111133813111	0.598968534828722	1.73817367289389	0.0821802165499458	0.581386897115607
PF3D7_0403400	16.7548579361052	0.966058063167741	0.557528263450259	1.73275173026978	0.0831398056435041	0.581386897115607
PF3D7_1331200	9.81352544561191	1.1045157639953	0.639636640031611	1.72678626405878	0.0842060562830943	0.584681627548694
PF3D7_0413600	18.2256121353341	-0.914788647145112	0.529420507034092	-1.72790557787404	0.084005154148452	0.584681627548694
PF3D7_0214900	13.1190386328013	-0.98347433941183	0.570694963557875	-1.72329248059343	0.0848356468722723	0.584919460014088
PF3D7_1238900	17.3328186354955	-0.914950148214083	0.53060145879668	-1.72436417775602	0.0846421201714669	0.584919460014088
PF3D7_1341300	51.9426247365943	-0.627119583363041	0.364829709029257	-1.71893781630802	0.0856256953595004	0.588302417417546
PF3D7_1216300	10.6997839912022	1.05472523711479	0.614748041433454	1.71570328984768	0.0862163623390146	0.590296696850744
PF3D7_0604500	34.579742134707	0.745659201855419	0.436450409229251	1.70846260213667	0.0875505399078238	0.592422875165754
PF3D7_1464500	30.9876170912316	0.76623142093421	0.448246650695029	1.70939686832268	0.0873774606390471	0.592422875165754
PF3D7_1444100	13.6371923462208	-1.06030503286974	0.621147809519039	-1.70700921201145	0.0878203401862536	0.592422875165754
PF3D7_0519200	91.9904996510481	-0.543586106877133	0.319262598872416	-1.7026300882001	0.0886373156736549	0.592422875165754
PF3D7_1305300	13.158519996876	0.984286384243141	0.577714530320966	1.70375909308754	0.0884261031738738	0.592422875165754
PF3D7_1362800	8.75792551253573	-1.15848161835658	0.680195395704605	-1.70316004147091	0.0885381222515111	0.592422875165754
PF3D7_0202000	94.671303707662	-0.558444760119913	0.327912945492769	-1.70302748883767	0.0885629242506631	0.592422875165754
PF3D7_1311500	14.5453540452418	-1.00015156994752	0.588204709825794	-1.70034607550785	0.0890658484991585	0.593269126443547
PF3D7_0817900	108.770113571288	-0.532641593708864	0.313790456305431	-1.69744357422525	0.0896128303661524	0.594895985369897
PF3D7_0815200	40.0792804346228	0.674175037619422	0.397796196685755	1.69477497079238	0.0901181172868866	0.59623602851425
PF3D7_0928300	10.7462283081357	-1.08332015270738	0.639818242364979	-1.69316859222874	0.0904233810607371	0.596248133504525
PF3D7_1306200	27.104592905213	0.776539572686387	0.459091338339937	1.69147075502303	0.0907469287179182	0.596380317494011
PF3D7_1101700	12.4508171510459	-0.991784383680836	0.587616307842985	-1.68780949480702	0.0914478043777994	0.598983118674586
PF3D7_0424600	11.4618224743589	-1.01666593533431	0.60433086483874	-1.68230020090998	0.0925106421973193	0.603931601055589
PF3D7_0324100	13.3477642707948	-0.950002890685661	0.56557801098495	-1.67970266211594	0.0930151815864208	0.604718241716921
PF3D7_1147300	19.7845971507813	0.860345991741815	0.512563818229773	1.67851487198836	0.0932466296387925	0.604718241716921
PF3D7_0617600	11.9732099283385	-1.04341989812471	0.624153983099668	-1.67173474235137	0.0945766400486337	0.609321631788738
PF3D7_1435500	21.0702189724238	0.90349208331903	0.540264158292893	1.67231542098564	0.0944621403473237	0.609321631788738
PF3D7_1437000	15.2241409904586	0.929737938406656	0.55916430095117	1.66272763984596	0.0963669668508192	0.618827091051829
PF3D7_1211700	19.0575826699605	0.877124065115948	0.528022268203583	1.6611497619221	0.0966833724222335	0.618836569412667
PF3D7_0721000	28.5624762247017	0.825648527036986	0.498445928442584	1.65644552382394	0.097631628468584	0.621728235504538
PF3D7_0827300	7.84473162534931	1.09811511698133	0.663204208018153	1.65577223983969	0.0977679515373548	0.621728235504538
PF3D7_1324300	22.0736201005821	0.804989114973663	0.487946315645263	1.64974934570239	0.09899421295524	0.62191856313163
PF3D7_0405900	14.6075589946545	-0.944483478619183	0.57157263093672	-1.65242950326596	0.09844702525725	0.62191856313163
PF3D7_0515300	10.2678612272838	1.03092461793406	0.624212208195521	1.65156112680697	0.098624050045677	0.62191856313163
PF3D7_1326600	19.2365917453964	0.84154897869959	0.510212434008954	1.64940899634136	0.0990638729059543	0.62191856313163
PF3D7_0811300	48.0041056839685	0.646849960164633	0.393585732724104	1.64347918733645	0.10028382804191	0.62757236338329
PF3D7_0317600	38.7631028091015	-0.736140234355959	0.449088833142177	-1.63918623673037	0.101174479325854	0.631136037699374
PF3D7_0532600	7.99278701242653	1.10473068284061	0.676162082529558	1.63382524898136	0.102295549087066	0.636109980873686
PF3D7_0527100	23.216342927841	-0.801512839330558	0.491485891964636	-1.6307952118964	0.102933538109878	0.638058051690568
PF3D7_1116000	14.0618643879076	-0.935808585816083	0.575672220124738	-1.62559274722916	0.10403631911907	0.64286593417916
PF3D7_0202100	9.79537058026029	-1.00542860217815	0.621845182166185	-1.61684713657467	0.105911281736291	0.650361464411912
PF3D7_1115800	16.834938167432	-0.874849419832127	0.54078285816544	-1.61774621111324	0.105717302644314	0.650361464411912
PF3D7_1336200	14.5652669947564	0.90754524963093	0.562708415823542	1.61281620126955	0.10678444520698	0.650614781088861
PF3D7_0516900	109.460971553714	-0.445788253248591	0.276530888324139	-1.61207399271091	0.1069458393342	0.650614781088861
PF3D7_1417400	8.93367442718682	-1.10292927815395	0.683453383937154	-1.61375933468985	0.106579638272334	0.650614781088861
PF3D7_1315600	22.733440181097	-0.763070032275363	0.474163174838406	-1.60929838664805	0.107551111708203	0.652277575637713
PF3D7_0627100	24.6357457650375	0.779837509093387	0.485866674802972	1.60504424266107	0.108484068479115	0.653922828500181
PF3D7_0606200	15.0772709432857	-0.876098479856248	0.546839910408706	-1.602111446477	0.109130967257549	0.653922828500181
PF3D7_1252100	50.3981900393929	-0.740562844181277	0.4621382333877	-1.60247040967069	0.109051625830189	0.653922828500181
PF3D7_1010700	12.4212136900119	-0.934675849529265	0.583831275080511	-1.60093487523493	0.109391344179448	0.653922828500181
PF3D7_1027400	10.7689304406703	-0.961837184565584	0.60095808377431	-1.60050627578678	0.109486315815043	0.653922828500181
PF3D7_1408700	56.3087730985698	0.565136814910817	0.353752894585299	1.59754682876396	0.110143867895885	0.655856667925494
PF3D7_1350200	7.88542936166505	-1.06572093724731	0.668121514982478	-1.59510046203984	0.110689772190668	0.657116019198375
PF3D7_1024800	64.9771934668787	0.533612010735984	0.335083949276285	1.59247260839703	0.111278553025396	0.658621556309947
PF3D7_1322000	17.3834309812287	0.846183410701311	0.535762245848355	1.57940096984889	0.114244115063335	0.660571446862413
PF3D7_1104200	26.6322761214499	0.768198019385264	0.488669441592252	1.57201976223889	0.115945968123447	0.660571446862413
PF3D7_1419700	19.1722983266972	0.801126098169059	0.510207554601347	1.57019646405476	0.116369411934732	0.660571446862413
PF3D7_1139300	10.9435360707089	0.979344768191756	0.625007083192164	1.56693387087686	0.117130149592042	0.660571446862413
PF3D7_0307200	50.4121306153925	-0.570906894362587	0.364307831044761	-1.56710025344595	0.117091259979614	0.660571446862413
PF3D7_1130400	22.8508474800223	-0.76321642748112	0.486407575870915	-1.56908828180683	0.116627369854585	0.660571446862413
PF3D7_0614500	51.2675888363651	0.589164934676486	0.373394216551049	1.5778630427607	0.114597076932161	0.660571446862413
PF3D7_1357100	56.6730422065538	-0.583313537050871	0.367056358800797	-1.58916614047119	0.112022888626835	0.660571446862413
PF3D7_1345800	8.56868012195361	1.03391724825494	0.65750351634443	1.57248930622194	0.115837117286619	0.660571446862413
PF3D7_0934800	20.3741117306725	-0.791132251734065	0.501119211898846	-1.57873063524406	0.114397854818109	0.660571446862413
PF3D7_0323800	10.2163274133198	1.00878946945494	0.641252487037976	1.57315486465348	0.115682963540891	0.660571446862413
PF3D7_1445200	8.72835796797358	1.01615515697812	0.645494685294543	1.57422699230195	0.115434981194807	0.660571446862413
PF3D7_0212100	11.3977700311079	0.951984072858833	0.606878240033548	1.56865745063822	0.116727778058546	0.660571446862413
PF3D7_1106000	8.1612511721102	1.04256705254575	0.65746305295717	1.58574241983096	0.112797752207705	0.660571446862413
PF3D7_0110600	18.0496056993987	0.877895255150284	0.554310546026492	1.58376069415127	0.1132481870559	0.660571446862413
PF3D7_1456500	13.3829836921635	0.9138710080221	0.581405982095311	1.57182938628981	0.115990124441122	0.660571446862413
PF3D7_0320800	13.5881420546596	0.91585555314646	0.584796440725415	1.56610999890899	0.117322867661569	0.660571446862413
PF3D7_1113400	15.2575699621396	-0.875171646677483	0.561198811068565	-1.55946810544928	0.11888562778865	0.667457881727704
PF3D7_0508600	11.5337065749907	-0.927736992266409	0.600639628042586	-1.54458172413598	0.122447469608614	0.685496517894378
PF3D7_1448300	22.9575091982165	0.736627104684376	0.478373130266386	1.53985886346539	0.123594759908951	0.687999159266541
PF3D7_1352500	54.4166678356923	-0.587316538042056	0.381106523727841	-1.54108235224406	0.12329674437947	0.687999159266541
PF3D7_0919100	21.8114962463094	0.788367740242474	0.512963553152441	1.53688841126728	0.124320637868698	0.690084896644046
PF3D7_1031600	18.4404164062181	-0.816256767718797	0.531932039163937	-1.53451326038143	0.12490343356129	0.691366892811082
PF3D7_1359600	99.3239358584355	0.494440689543004	0.322535989773424	1.53297835038608	0.125281189267075	0.691509935139895
PF3D7_0820700	8.36277571309826	1.01318715720224	0.663740384884738	1.52648110658234	0.126890092202412	0.698428658761178
PF3D7_0416600	12.5643300291684	0.930107259258776	0.610168830215948	1.52434410477768	0.127422775037461	0.699401544549192
PF3D7_1237700	64.5306762447297	0.521202973065379	0.342544361176039	1.52156342984588	0.128118506629397	0.701261463862857
PF3D7_0507000	18.4418418768866	-0.766073445667077	0.504668284077973	-1.51797422155563	0.129020897382574	0.701310250401857
PF3D7_0804500	37.3278144870371	0.67847059016367	0.447164887861054	1.51727161184106	0.129198122465889	0.701310250401857
PF3D7_1014900	11.798870843614	-0.940814598051082	0.619797249700428	-1.51793929144702	0.129029703630474	0.701310250401857
PF3D7_0414600	9.07760372556692	-0.968741005536447	0.640080648788873	-1.5134671035118	0.130161051126811	0.702655124901604
PF3D7_1145200	21.0779396161672	-0.779676563487793	0.514934643927085	-1.51412722504294	0.12999357485177	0.702655124901604
PF3D7_1142500	34.7033400889612	-0.647651784931179	0.432061189746853	-1.49898162644657	0.133878398664032	0.70528432540167
PF3D7_1126300	11.5467418642593	0.899040188134091	0.597031281485075	1.50585106009486	0.132105412276239	0.70528432540167
PF3D7_1462700	11.1639248170313	0.914606453923718	0.607291650482842	1.50604154230762	0.132056509687374	0.70528432540167
PF3D7_0504000	14.6819774306627	0.856381429862465	0.570638429953986	1.50074265052832	0.133422137043134	0.70528432540167
PF3D7_1346100	35.4069912365976	-0.648971842907369	0.430548956599784	-1.50731254357822	0.131730563874995	0.70528432540167
PF3D7_0903600	10.1678898260043	-0.926685659960414	0.617099717360741	-1.50167895704722	0.133180040967342	0.70528432540167
PF3D7_1222700	19.3780209273476	-0.760194104548769	0.50635303709707	-1.50131242207408	0.133274773544323	0.70528432540167
PF3D7_1246800	9.23917406633705	-0.94512046572388	0.630166692028809	-1.49979438405588	0.133667672517212	0.70528432540167
PF3D7_0703200	13.3519868318498	0.917257936426966	0.60851732075836	1.50736537011607	0.131717030119693	0.70528432540167
PF3D7_1107800	29.8930282018168	-0.682651931753038	0.457090594548021	-1.49347184102105	0.135313719889245	0.710939731503655
PF3D7_1460600	21.8641711115592	-0.722877481332188	0.487082781155989	-1.48409574162443	0.137783522785928	0.711963755803782
PF3D7_1444300	19.3770020334749	-0.74981453544914	0.503029350355646	-1.49059798383338	0.13606707397722	0.711963755803782
PF3D7_0729300	7.84099363568611	-0.997784138436732	0.671905444241695	-1.48500677734919	0.137542028797695	0.711963755803782
PF3D7_1442900	25.2521873266238	0.688611369090794	0.463407174125718	1.48597477022222	0.137285794564478	0.711963755803782
PF3D7_1341200	48.5973267098499	-0.578781576341344	0.389938497055368	-1.48428939617922	0.137732162214521	0.711963755803782
PF3D7_0726500	36.1915867210392	0.678500224483105	0.457484405295886	1.48311115445405	0.138044880896306	0.711963755803782
PF3D7_0216700	8.12078606356201	-0.969527565391496	0.652557873939669	-1.48573422237356	0.137349434798637	0.711963755803782
PF3D7_0508700	11.172067368755	0.913223251132674	0.62876936561662	1.45239781241107	0.146391024229113	0.7220855264779
PF3D7_1222300	76.5504723676412	0.469424817433001	0.320309319500716	1.46553593309342	0.142774756151082	0.7220855264779
PF3D7_1359300	8.11234939773295	0.959010897368599	0.660463483935985	1.45202713048334	0.146494061675551	0.7220855264779
PF3D7_1017600	12.3163748196527	0.872452813037162	0.6020799873858	1.449064628149	0.14731953500172	0.7220855264779
PF3D7_0412700	16.2692487110811	-0.84630141514954	0.581485093575699	-1.45541377500396	0.145554745164123	0.7220855264779
PF3D7_0202400	15.7806139077979	-0.835106892905066	0.569118037777964	-1.46737027729013	0.142275355458631	0.7220855264779
PF3D7_1472200	18.8648617179668	0.842391165043052	0.58094650717302	1.45003223987397	0.147049528981658	0.7220855264779
PF3D7_1320600	31.0523026550051	-0.694485280642366	0.477632223240696	-1.45401680801672	0.145941646291758	0.7220855264779
PF3D7_0905500	16.8712907809099	-0.819668765298091	0.567082026397278	-1.44541482033123	0.148341403036219	0.7220855264779
PF3D7_0403900	8.1488449573238	-0.935230221154998	0.647761465467925	-1.44378798525691	0.148798622679292	0.7220855264779
PF3D7_1433700	11.7660530673911	0.873900629914376	0.605325176397886	1.44368789534693	0.148826787900025	0.7220855264779
PF3D7_1130200	96.5751168257396	-0.436191554047161	0.297005372176297	-1.46863186632276	0.141932666745596	0.7220855264779
PF3D7_0706500	25.9332702343873	0.660026414581606	0.451965532996329	1.46034678840647	0.144194789132248	0.7220855264779
PF3D7_0317000	30.0202920113897	-0.626743958663927	0.426737301172545	-1.4686880123716	0.141917430396673	0.7220855264779
PF3D7_1004000	68.7810717311012	-0.482509251199734	0.331823375437105	-1.45411470956238	0.145914506055218	0.7220855264779
PF3D7_1127100	30.902972759339	0.648247723431888	0.444053608648215	1.45984113360835	0.144333740735053	0.7220855264779
PF3D7_0607700	18.7672880081498	0.799434707792822	0.549625250989428	1.45450869725088	0.145805323963938	0.7220855264779
PF3D7_0505500	12.8163693268685	0.841502615968998	0.579345219807252	1.45250635924633	0.146360862259142	0.7220855264779
PF3D7_0222100	15.1426850771305	-0.828357837213474	0.563668063114887	-1.4695844796242	0.141674326284725	0.7220855264779
PF3D7_0510100	42.7217629682225	0.545110086173261	0.376814786224371	1.44662605105066	0.148001685869444	0.7220855264779
PF3D7_1206700	49.0412196363994	0.573676122076704	0.397071373445692	1.44476827200732	0.148522985849342	0.7220855264779
PF3D7_0813900	19.8890081377194	-0.77070672925505	0.52290388451493	-1.47389750215758	0.140509190398015	0.7220855264779
PF3D7_1124000	8.6820453879864	0.931212711179584	0.643027746260225	1.44816878679872	0.147569851681254	0.7220855264779
PF3D7_1439300	14.7542092953933	0.880495032748065	0.609164975398041	1.44541309547997	0.148341887234256	0.7220855264779
PF3D7_0819000	9.72997672214535	0.948854989938124	0.657863280824951	1.44232854697145	0.149209710582646	0.722160298755912
PF3D7_0613400	17.304326750388	-0.756454305130671	0.525029657239834	-1.44078395324842	0.149645728237678	0.722491046651197
PF3D7_0702500	31.0531868115322	-0.61808685248631	0.429928200402714	-1.43765133784513	0.150533006723287	0.722565892556028
PF3D7_1355500	17.5094535675773	0.773347848557851	0.543552919828247	1.42276459264024	0.154804408775425	0.722565892556028
PF3D7_1243600	75.7451207148284	-0.458371286722079	0.319763449589533	-1.43346992068815	0.151723588983649	0.722565892556028
PF3D7_0826700	98.6960913368272	-0.434208009721535	0.303729131107766	-1.42958960880007	0.152834839648231	0.722565892556028
PF3D7_1323500	28.0024069609374	0.650760323367855	0.456137197168297	1.4266767266686	0.153673096983241	0.722565892556028
PF3D7_1228500	15.6234920133369	-0.787538177097779	0.553984942206894	-1.42158769507432	0.155145978998101	0.722565892556028
PF3D7_0713900	34.6992629776916	0.606730313897622	0.426177665903463	1.42365581878018	0.154546129041807	0.722565892556028
PF3D7_1244300	13.2520320793753	-0.855823017354967	0.600185955763242	-1.42592976249609	0.153888617351379	0.722565892556028
PF3D7_1452000	21.4238682840146	-0.78974017505335	0.552745224728314	-1.42875983314288	0.153073273961765	0.722565892556028
PF3D7_0627900	9.09306411170993	-0.930754756549196	0.653838299672454	-1.42352437447526	0.154584201361151	0.722565892556028
PF3D7_1457400	10.7936137587475	0.87277026082251	0.613986623116732	1.42148090522255	0.155177000844094	0.722565892556028
PF3D7_1441500	9.56028939951745	0.904484963599167	0.628925439275282	1.4381433904811	0.150393373390183	0.722565892556028
PF3D7_1118300	18.2085231261143	-0.731624206264484	0.512708694504372	-1.42697834873219	0.153586135523527	0.722565892556028
PF3D7_0931800	30.3972672130288	-0.610721407817095	0.427871388708966	-1.42734808620845	0.153479586578339	0.722565892556028
PF3D7_0107800	8.22420145558877	-0.934232242991855	0.655990959261563	-1.42415414389781	0.154401855849546	0.722565892556028
PF3D7_1475100	9.96194508221375	0.892113924907611	0.628946583024522	1.41842558491621	0.156066550336489	0.724990003336173
PF3D7_1417600	32.1825845918367	0.703296849352549	0.496639714052279	1.41611077296673	0.156743074427973	0.725891028307206
PF3D7_0519800	18.6277827576553	0.736190753108042	0.520189415168983	1.4152359345276	0.156999331822169	0.725891028307206
PF3D7_1137300	12.4123443595956	0.834461739517024	0.59043871793439	1.41329102270991	0.157570172489113	0.726820161833585
PF3D7_0216600	16.4676741884008	-0.772101775087336	0.547133100118967	-1.41117723442331	0.158192361068267	0.727981240044833
PF3D7_1019900	11.4087361253459	-0.846133870040832	0.600344432238588	-1.40941403734808	0.15871277569103	0.728669636058117
PF3D7_1402800	30.8632223380549	0.606165939564305	0.43050107332421	1.40804745243411	0.159117019309144	0.728822710821603
PF3D7_0515700	50.3452469942401	-0.525419539791675	0.374165432675241	-1.40424393572379	0.160246222754775	0.732287971425893
PF3D7_0532100	184.898722018998	-0.449689940051818	0.321596537866094	-1.3983046678166	0.162021596758443	0.73527121854582
PF3D7_1237900	10.3006459240549	-0.848442617729252	0.605729532911649	-1.40069547814669	0.161305155481121	0.73527121854582
PF3D7_1419800	14.3741591884768	0.808645477306103	0.5778466322965	1.39941194100648	0.161689488131637	0.73527121854582
PF3D7_1131100	14.0422048254389	0.788201461025432	0.569603830584373	1.38377134896862	0.166428478584116	0.742048786111256
PF3D7_1013600	18.1175590273973	0.740934424296619	0.535789963030557	1.38288224009594	0.166700976744088	0.742048786111256
PF3D7_1460500	17.5280548545222	0.745287184096666	0.53953707978836	1.38134562389857	0.167172716410787	0.742048786111256
PF3D7_1408000	65.0234711212561	-0.452018724743176	0.327322210638679	-1.38095952566489	0.16729140572381	0.742048786111256
PF3D7_1133200	28.0392694436936	0.643746057586308	0.463448937382507	1.3890334094239	0.164822591018249	0.742048786111256
PF3D7_0113200	12.3286481326395	-0.802316444537021	0.580793532878333	-1.38141421885476	0.167151636459537	0.742048786111256
PF3D7_0821700	39.0928699595906	-0.549642999080218	0.395887376248983	-1.38838223205818	0.165020683898793	0.742048786111256
PF3D7_1359400	31.0461025835221	0.613744633771881	0.44222847586028	1.38784512367266	0.165184211007083	0.742048786111256
PF3D7_0423700	183.398133050085	0.328360663851414	0.236685873728225	1.38732683399794	0.16534212421055	0.742048786111256
PF3D7_1112000	23.0946252927743	-0.692763595468946	0.499673854478151	-1.38643154781923	0.165615168810881	0.742048786111256
PF3D7_0829100	8.70137661740231	0.888716476272121	0.645337629939552	1.37713413109873	0.168470782020097	0.743921543077507
PF3D7_1424400	73.0169360059699	-0.440179879181885	0.319380912036675	-1.37822851207632	0.168132746849405	0.743921543077507
PF3D7_0625300	8.48115889732042	0.96570410615138	0.70226206117132	1.37513352855864	0.169090051374099	0.744981952802926
PF3D7_1242700	53.179051532315	-0.511905608652031	0.373320386793383	-1.37122328906015	0.170305360373906	0.748657792247709
PF3D7_0611700	37.5868245191614	-0.55050650739135	0.403510921527495	-1.36429146776846	0.172475850179426	0.756322644461317
PF3D7_0212400	23.0386290345045	0.694113262968427	0.509178470450378	1.36320230184609	0.172818762016861	0.756322644461317
PF3D7_1421100	8.38853952657531	-0.897415089552421	0.659622870011867	-1.36049723311788	0.173672627879659	0.758370475074511
PF3D7_1119700	9.32237486232563	-0.846477320114711	0.627463153258063	-1.3490470567386	0.177321851954622	0.759345136341698
PF3D7_0506700	8.87194730665248	0.887895599564481	0.65580283654549	1.35390631160055	0.175766269643501	0.759345136341698
PF3D7_1007200	9.72405611488789	-0.831652816578196	0.615277054472527	-1.35167208094761	0.176480240208596	0.759345136341698
PF3D7_1342100	10.5080050551486	0.855661567966916	0.634347076958458	1.34888549036847	0.177373749405007	0.759345136341698
PF3D7_0912000	11.4348284834449	0.806722505403838	0.596685850281256	1.35200542299365	0.176373580467944	0.759345136341698
PF3D7_0605800	25.2976559444721	-0.682684279849793	0.502830523898699	-1.35768265330552	0.174564403408978	0.759345136341698
PF3D7_0707800	13.940139824116	0.772266579259381	0.571677378625318	1.35087832426815	0.176734412740955	0.759345136341698
PF3D7_0318300	10.4408927665011	0.843847027332159	0.623084840541066	1.35430518033369	0.17563903412564	0.759345136341698
PF3D7_1437200	36.5972670526972	0.557351163344336	0.411755824107475	1.35359630808491	0.175865205426633	0.759345136341698
PF3D7_1216400	11.7390717168198	0.79058348003534	0.590287680671793	1.33931895569224	0.180466860363953	0.759351992751963
PF3D7_0925900	64.7004321777462	0.548030768339784	0.407984219667223	1.3432646213297	0.179186303537268	0.759351992751963
PF3D7_0529400	29.7769343086501	0.577249400114057	0.430879257238515	1.33970106570834	0.18034255095574	0.759351992751963
PF3D7_1432000	14.6342550207489	0.741842325828088	0.551523928206287	1.34507731738997	0.178600267366554	0.759351992751963
PF3D7_0513100	10.5190737605644	-0.822348605475757	0.611630559314585	-1.34451850541495	0.178780776432551	0.759351992751963
PF3D7_1346300	82.9306212173681	0.421653791818242	0.314711565734417	1.33981028258133	0.180307031820203	0.759351992751963
PF3D7_0212500	49.419128854255	0.502161799298434	0.373993111557303	1.34270333805732	0.179368053405784	0.759351992751963
PF3D7_1009700	11.4724600721649	-0.852856360573413	0.634445957913847	-1.34425375390164	0.178866344598201	0.759351992751963
PF3D7_1136800	13.9013161047886	0.754022613224231	0.566220189338372	1.3316773711395	0.182966228277728	0.767971672598283
PF3D7_0926500	8.76488081778704	0.863076488997039	0.648602117914005	1.33067170944926	0.18329705569903	0.767971672598283
PF3D7_0322000	26.9564645456966	-0.606638637107863	0.456574920260623	-1.32867271106696	0.183955971795621	0.769092520379565
PF3D7_1328200	8.39752415670206	0.877712948662832	0.66221775684266	1.32541439668972	0.1850337445923	0.770113664433919
PF3D7_0529000	11.3359045463032	0.795883832041639	0.600946994145089	1.32438274888764	0.18537596095534	0.770113664433919
PF3D7_1328300	23.418347862748	0.641911446034283	0.484508187745565	1.32487223594945	0.185213530866247	0.770113664433919
PF3D7_1227500	22.6726656093201	0.647406430421268	0.490276526172302	1.32049240757194	0.186670669284112	0.773856255576539
PF3D7_1123500	15.0046346574745	0.722851293787881	0.548463454979288	1.31795708032211	0.187518015937941	0.774102733861457
PF3D7_1201000	34.4125093239027	0.609079070517264	0.46211470638512	1.31802572413626	0.187495036748477	0.774102733861457
PF3D7_1342900	13.3118293706235	0.78680364112849	0.600022852404826	1.31128945835157	0.189759988522324	0.781664955791332
PF3D7_0801200	18.1379384398337	-0.697312179980047	0.532238879444616	-1.3101488953751	0.190145470161963	0.781664955791332
PF3D7_0503800	36.4839145046185	-0.518225632904607	0.396214997236689	-1.30794047807088	0.190893498739468	0.783101722386337
PF3D7_1215300	8.51322165134405	-0.869802039063143	0.665900108874637	-1.30620498100398	0.191482859398949	0.783882955664448
PF3D7_1004500	14.6854829077476	0.736957699096201	0.564844216036615	1.30470964944506	0.191991734472728	0.784332137710831
PF3D7_0511500	93.6590580502472	0.376358812138237	0.288863106094993	1.30289678466059	0.192610001814435	0.78506792553781
PF3D7_1466100	11.1534484797209	0.826863412838507	0.635149523782205	1.30184056175415	0.192970894674179	0.78506792553781
PF3D7_1125000	8.94486594189896	0.872897809450929	0.673539287888966	1.29598647791846	0.194980143576598	0.789971097171167
PF3D7_0516700	12.6808199287356	0.759047480319884	0.585343825837553	1.29675491021671	0.194715529449932	0.789971097171167
PF3D7_1321700	15.9838561980138	0.733521798826375	0.56726069246549	1.29309470684151	0.195978305621703	0.790549444626398
PF3D7_1444800	113.065188994845	-0.383700851342297	0.297231028304249	-1.29091788812013	0.196732151868859	0.790549444626398
PF3D7_0217600	7.83367752162348	0.883726270665334	0.68401493073486	1.29196926990456	0.196367786916255	0.790549444626398
PF3D7_0820200	14.4641181127493	0.718236627288081	0.556018125837599	1.29175038350793	0.196443603010945	0.790549444626398
PF3D7_1018600	9.53717717186244	-0.803323282036087	0.62355733187049	-1.28829097338388	0.197644694110472	0.790751739818581
PF3D7_1425300	11.9683465509637	-0.764098378936225	0.594365386397893	-1.28557011633363	0.19859313165229	0.790751739818581
PF3D7_1033400	24.37502588044	-0.598804116359651	0.465197661624581	-1.28720362494619	0.198023324124557	0.790751739818581
PF3D7_1148500	25.3504829791883	0.623851632083976	0.484190887266474	1.28844149795128	0.19759232111113	0.790751739818581
PF3D7_1219100	32.0204493610289	-0.616766083042239	0.479976064937021	-1.28499341550118	0.198794584972203	0.790751739818581
PF3D7_0716300	67.1934240559086	0.429693631365531	0.335852930537883	1.27941009976408	0.200752679123293	0.791145045474105
PF3D7_1307700	12.9966427758566	0.745186241383483	0.584207488133253	1.27555065027429	0.202114408563868	0.791145045474105
PF3D7_1350100	12.2049282995407	0.755304464027871	0.590809634759067	1.27842272635903	0.201100415052815	0.791145045474105
PF3D7_1104900	9.5197557125274	-0.849331553814604	0.664168471571948	-1.2787893285636	0.200971252809645	0.791145045474105
PF3D7_1026800	99.9474419579278	-0.40823369570503	0.320042353893713	-1.27556147096895	0.202110581310201	0.791145045474105
PF3D7_0323000	27.0928717405859	-0.572376350498716	0.448150157497627	-1.27719770019661	0.201532458733652	0.791145045474105
PF3D7_0621200	15.9124821300395	0.705031497778069	0.550477478857688	1.28076356409912	0.200276725553991	0.791145045474105
PF3D7_0704600	56.5885579082597	0.448700426880376	0.350871266190909	1.27881781757597	0.200961218021803	0.791145045474105
PF3D7_1251300	8.43271249754413	-0.816329397183825	0.642700764295062	-1.27015470112161	0.204029529835491	0.793504519097897
PF3D7_1345400	8.75845385957593	0.847164418536017	0.667424073541618	1.26930455780629	0.20433246140638	0.793504519097897
PF3D7_0529500	8.4374236988634	-0.833226380492934	0.654924441740391	-1.27224810587115	0.20328498033218	0.793504519097897
PF3D7_0624600	60.6515905320972	0.461198569063437	0.363277573938289	1.2695486926528	0.204245435365638	0.793504519097897
PF3D7_1427500	14.9457830090912	0.728084040377961	0.574618433765138	1.26707393566763	0.205128854262705	0.795026032793326
PF3D7_0501000	36.9861632940376	0.548493141758191	0.433806696479076	1.2643722335546	0.206096454121304	0.79720380383536
PF3D7_1344200	24.3631016115945	0.60703256855495	0.480966879665944	1.26210887738583	0.206909611318352	0.798776790256504
PF3D7_1424700	17.099655169778	0.706165026096897	0.561101583571617	1.25853329730759	0.20819895299744	0.799044809843692
PF3D7_1466400	23.3319794246492	0.653941038190192	0.519470888620382	1.25885983702944	0.208080962778966	0.799044809843692
PF3D7_0904000	27.7336675201241	0.564356642179558	0.447693759971382	1.26058634861391	0.20745791960807	0.799044809843692
PF3D7_1461300	73.6549418779491	-0.406900836500972	0.324119611492853	-1.25540332048048	0.209332384569424	0.801828724520309
PF3D7_1145100	8.63999458732601	0.84154502549659	0.671893542534055	1.25249756430564	0.210388615293706	0.803679348598427
PF3D7_0306100	9.17861863730107	0.823911542645822	0.658168135942564	1.25182532798537	0.210633518843863	0.803679348598427
PF3D7_1339400	10.5875364399158	-0.759788148317067	0.60754044301161	-1.25059682372873	0.21108161003422	0.803828224258223
PF3D7_1026000	21.8102550230851	0.704186961517981	0.56699968983582	1.2419529924644	0.214253906345843	0.805310232206677
PF3D7_1323700	23.5043274175393	-0.667448415661958	0.537023972267135	-1.24286521669455	0.213917505211238	0.805310232206677
PF3D7_0320500	13.1996788046649	0.724725654810612	0.581623746115437	1.24603862832446	0.212750214050813	0.805310232206677
PF3D7_1230400	7.78182151342668	0.834214157942357	0.669245682990546	1.24649912452874	0.212581210418252	0.805310232206677
PF3D7_0310000	9.73201199962926	-0.7894048484291	0.63441230907995	-1.24430884636196	0.21338591646029	0.805310232206677
PF3D7_0513300	21.7054867529252	-0.609840707754667	0.491125440478616	-1.24172086699553	0.214339568164932	0.805310232206677
PF3D7_0106800	19.7753171265067	0.666143934029292	0.534953131339292	1.24523793768915	0.213044301140068	0.805310232206677
PF3D7_1409800	12.118280675785	0.73520154888044	0.592773760447969	1.24027343640319	0.214874274124495	0.805778527966857
PF3D7_0106900	9.69294304976948	0.800590821754275	0.647624916776574	1.23619521271519	0.21638600976063	0.806828290663449
PF3D7_0718100	9.5438099561225	0.77954580995474	0.630435998014707	1.23651855606214	0.216265872583917	0.806828290663449
PF3D7_0317200	33.1107475284287	0.551606271640644	0.445744878166585	1.23749323583814	0.215904023996613	0.806828290663449
PF3D7_1445700	11.5400182816813	0.760198364911227	0.617316647418127	1.23145612238175	0.21815231768873	0.8068922630365
PF3D7_0800300	8.20608345999305	-0.797504162803723	0.647739192403637	-1.23121183982142	0.218243644330665	0.8068922630365
PF3D7_1370800	23.4899944514773	0.608455286099115	0.493942521485161	1.23183419048363	0.218011028595517	0.8068922630365
PF3D7_1440100	17.8274412668241	0.665233662993181	0.539339963270348	1.23342179014413	0.217418439444398	0.8068922630365
PF3D7_0924400	19.7335391733597	0.659468198584967	0.535872769856932	1.23064323414125	0.218456327702503	0.8068922630365
PF3D7_1439500	12.7015737918	-0.749446958752892	0.610304785929363	-1.22798800866627	0.21945146946686	0.807532092701086
PF3D7_1230000	12.7194823875674	0.705903776809524	0.574403546789597	1.22893352722993	0.21909672977479	0.807532092701086
PF3D7_0412900	8.3839719836625	-0.788058398596174	0.642364463811446	-1.22680883360244	0.219894449904006	0.807649708525928
PF3D7_1001200	90.9565655310358	-0.389041503404315	0.318841450739899	-1.22017229096628	0.22239956861204	0.814431305504248
PF3D7_1037300	32.3862122846135	0.526541455960211	0.43246326833172	1.2175402965237	0.223398714334244	0.814431305504248
PF3D7_1422400	7.96471630580482	-0.798234314371303	0.655025912556087	-1.21863013213688	0.222984607072395	0.814431305504248
PF3D7_1105300	11.274759701371	0.759624048725014	0.623736531683907	1.21786044289285	0.223277010579858	0.814431305504248
PF3D7_1130700	11.0788901756103	0.725701815737408	0.599925256007519	1.20965371680954	0.226411796619857	0.822364473859553
PF3D7_1039700	12.6197748579613	-0.691415749354308	0.571217405131042	-1.21042486300937	0.226115906225466	0.822364473859553
PF3D7_1116600	9.07628078846484	0.780417742871973	0.649759767744821	1.20108658863358	0.22971761481126	0.824577943022797
PF3D7_0603400	10.3600612550891	0.760196510314913	0.630280783451699	1.20612357265874	0.227769846966661	0.824577943022797
PF3D7_0903000	8.01427160786686	-0.791242727942291	0.659113299585065	-1.20046542596001	0.22995863245623	0.824577943022797
PF3D7_0505900	13.1978331463727	-0.675501049804279	0.561682479502065	-1.20263863384721	0.229116190522581	0.824577943022797
PF3D7_0608700	30.3284575594834	-0.547912445007184	0.455753778621763	-1.20221152453001	0.22928158536636	0.824577943022797
PF3D7_1361900	21.7589424218094	0.580655618848411	0.48221453771117	1.20414374399513	0.228534024962157	0.824577943022797
PF3D7_1438100	20.4469425908325	0.628296340654936	0.522857604951823	1.20165860590825	0.229495825077888	0.824577943022797
PF3D7_0310200	24.9261838132753	0.568263088883558	0.474861576935461	1.19669208140795	0.231426594610276	0.828330161036779
PF3D7_1407300	8.53238599441432	0.776780743245856	0.651503007021264	1.19229034229232	0.233147420046881	0.829954131145147
PF3D7_1343800	21.2187442810129	-0.613341425446257	0.513555802684052	-1.19430336925546	0.232359320156712	0.829954131145147
PF3D7_0627800	16.8046417970622	0.667938121249918	0.55992915255695	1.19289756248579	0.23290949398324	0.829954131145147
PF3D7_1411100	10.2154412096776	-0.750750424914442	0.631649098625273	-1.18855615649319	0.234614369343555	0.830661686054207
PF3D7_1420700	62.0651798774453	0.396312697884189	0.333422628493871	1.18861967969722	0.234589360155368	0.830661686054207
PF3D7_1443100	8.72744056861536	0.765092078441017	0.643520404889602	1.18891657922218	0.234472495368601	0.830661686054207
PF3D7_1433400	80.3852825259149	0.380138779228634	0.32469746200438	1.1707476149706	0.241700239900793	0.831164403891019
PF3D7_1421900	12.7073078954544	0.686282292661104	0.585371705346104	1.17238719670493	0.241041637480971	0.831164403891019
PF3D7_0509100	20.0131604116159	0.588742210564063	0.502113851849937	1.17252732302636	0.24098540891347	0.831164403891019
PF3D7_1113800	13.9399454841686	0.702846983690721	0.598966202907445	1.17343345964935	0.240622025957366	0.831164403891019
PF3D7_1207000	20.6772558046742	0.603586216686898	0.509164560581947	1.18544428150504	0.235841832404139	0.831164403891019
PF3D7_1456000	9.98952052124712	0.75439679848615	0.639598539547829	1.17948486720979	0.238205159010468	0.831164403891019
PF3D7_0909600	14.1537033299667	0.68653513750383	0.581316271675677	1.18100106767157	0.237602299164329	0.831164403891019
PF3D7_1427900	58.7264433828784	0.42783997868164	0.365240284576338	1.17139318073283	0.241440772051914	0.831164403891019
PF3D7_0420000	18.3745037029849	0.605680355504038	0.513894876530684	1.17860749963689	0.23855450392866	0.831164403891019
PF3D7_0716000	9.24646054166112	0.74942871945767	0.634086311620206	1.18190332408019	0.237244062886854	0.831164403891019
PF3D7_0413500	11.4230759597225	-0.697617506175624	0.588548082694717	-1.18531947803062	0.235891155075597	0.831164403891019
PF3D7_1248300	9.74296349217729	-0.744396833670168	0.635180635242952	-1.17194510091675	0.2412190980582	0.831164403891019
PF3D7_0934700	15.3578811597412	0.637948374017948	0.54065562615119	1.17995326999436	0.238018801172205	0.831164403891019
PF3D7_0918300	15.4839447075506	-0.626874232659697	0.535892580491672	-1.16977591308421	0.242091159308325	0.831164403891019
PF3D7_0727400	17.5782344874782	-0.6190393653396	0.526112385320772	-1.17662952367519	0.239343408520139	0.831164403891019
PF3D7_1412900	13.405684871414	0.672286824947678	0.572353726148761	1.17460024148239	0.240154686653743	0.831164403891019
PF3D7_1120000	14.6063671532275	0.715913462830704	0.612371652796964	1.16908328391888	0.242370078081198	0.831164403891019
PF3D7_1308300	40.1157793867371	-0.502589552444465	0.424234305391383	-1.18469804553122	0.236136855514779	0.831164403891019
PF3D7_1456800	36.5270330827246	-0.507097043781201	0.434757139374701	-1.16639152725713	0.243456182587658	0.833434492656355
PF3D7_0823800	22.9414627461672	0.551981388815565	0.474380938725314	1.16358256362232	0.244593220955325	0.835870746395154
PF3D7_1235900	10.9566361481153	0.715583536544094	0.61622811212654	1.16123156743805	0.24554774044411	0.836224107404983
PF3D7_0615400	28.667230008361	0.5216217771217	0.448799860808529	1.1622592221441	0.245130185147657	0.836224107404983
PF3D7_0508000	14.9487676487219	-0.635750480550831	0.548025265173708	-1.16007512965541	0.246018218939069	0.836376816981435
PF3D7_0212600	8.51829821885125	-0.758576111334136	0.655300171154057	-1.1576009662842	0.247026914761113	0.836514320250168
PF3D7_1019800	11.1271380955444	0.719724206245604	0.621999839420998	1.15711317050431	0.247226126404316	0.836514320250168
PF3D7_0403700	14.6094388490619	0.64426327256567	0.556914193251597	1.15684477137147	0.247335786292798	0.836514320250168
PF3D7_0524600	9.90089438558943	0.724806289882524	0.628108340262722	1.15395106770809	0.248520230704843	0.836636465801854
PF3D7_1141300	8.17483454086574	0.784481410417382	0.680007419974527	1.15363654479942	0.248649209174699	0.836636465801854
PF3D7_0409800	9.42602165026729	0.747515897687607	0.6475546707428	1.15436723949523	0.248349640349672	0.836636465801854
PF3D7_0813200	9.48634177789499	0.728124185781058	0.633840752050906	1.14874940341889	0.250659328099729	0.84195825592473
PF3D7_1368900	10.9284637835998	-0.690209524421213	0.602528929473302	-1.14552097112508	0.25199341338451	0.842503994909895
PF3D7_0503000	8.20562729548723	0.744119646683458	0.650335218775523	1.14420936341802	0.252536820866121	0.842503994909895
PF3D7_0707700	30.3870034442807	-0.504077237809793	0.440089546158809	-1.14539698161313	0.25204474811318	0.842503994909895
PF3D7_1355700	21.6939697421802	0.574281351978769	0.501538711841873	1.14503893402316	0.252193029610181	0.842503994909895
PF3D7_1343100	46.1384094930753	0.452234174692412	0.395608372252258	1.14313600624217	0.252982126836718	0.842559117346019
PF3D7_1443600	8.99393778923257	0.721800041903992	0.633409213301096	1.1395477469332	0.254474765371888	0.843100923195049
PF3D7_1448500	22.7034407618524	0.550167632812281	0.489239992719031	1.12453528125253	0.260786011851712	0.843100923195049
PF3D7_1004300	23.7471103166846	0.561629897949236	0.492601647605315	1.14012996237322	0.254232160786975	0.843100923195049
PF3D7_1409900	38.4028854090315	0.448468510417257	0.394458109061763	1.13692303470186	0.255570461717946	0.843100923195049
PF3D7_1436000	15.8835652761422	0.618311814120557	0.548100977651797	1.12809836021377	0.259278381602145	0.843100923195049
PF3D7_1336700	24.0197455441112	0.544889454560297	0.487777622424226	1.11708579793437	0.263957642271519	0.843100923195049
PF3D7_1414400	53.566713177755	0.397488358407139	0.350347261003934	1.13455534736627	0.256561671213372	0.843100923195049
PF3D7_0922200	545.535511015933	0.23287268011211	0.206963646409183	1.12518639941095	0.260510055191362	0.843100923195049
PF3D7_0801900	10.7947656696091	-0.685422132476055	0.605674899322236	-1.13166672953272	0.257774574095768	0.843100923195049
PF3D7_1149000	83.8694671366458	-0.415035717848277	0.368837172631337	-1.12525458019145	0.260481170527664	0.843100923195049
PF3D7_1149400	18.6273248727928	0.594211150836171	0.530777184617102	1.11951147874758	0.262921996651979	0.843100923195049
PF3D7_1005500	20.2264942419083	0.558469555781732	0.498216021491473	1.12093857220786	0.262314010731434	0.843100923195049
PF3D7_0525200	32.3640362886248	0.504209012706723	0.44896730817379	1.12304170822066	0.261419781094372	0.843100923195049
PF3D7_1453700	51.5058421258714	0.499808070897215	0.44737361531794	1.11720506928423	0.263906653632897	0.843100923195049
PF3D7_1338300	37.0133046250619	0.470834963531015	0.420454107187162	1.11982486431373	0.262788401427654	0.843100923195049
PF3D7_0710200	28.0113532550542	0.494667773474875	0.44217870564079	1.11870555312703	0.263265775365254	0.843100923195049
PF3D7_0935000	9.64117767651135	-0.714269612067146	0.630398152748663	-1.13304521745945	0.257195265036371	0.843100923195049
PF3D7_1036900	35.3767111106631	0.45780404985339	0.410114103843817	1.11628457924903	0.264300340299313	0.843100923195049
PF3D7_1462300	24.8189918896626	0.562166975528747	0.495913079338663	1.13359981607752	0.25696245022678	0.843100923195049
PF3D7_0719400	16.5991182317575	0.617341016205308	0.548890956822655	1.12470611609068	0.260713589134724	0.843100923195049
PF3D7_1355800	9.12222800226409	0.722044048318881	0.643853351427915	1.1214417797431	0.262099860534293	0.843100923195049
PF3D7_0532300	19.809645600645	-0.61127275841939	0.536079874820515	-1.1402643283784	0.25417619439648	0.843100923195049
PF3D7_0516800	24.2281976099903	0.557213593278008	0.498691349059277	1.11735163308753	0.263844006742748	0.843100923195049
PF3D7_1022000	12.8553631191524	0.656936709180581	0.57974135406255	1.133154819088	0.257149243795167	0.843100923195049
PF3D7_1415400	21.3099265316088	-0.563130007498302	0.497090299806478	-1.13285253749175	0.257276184362323	0.843100923195049
PF3D7_1236400	12.8950328223762	-0.652363642053156	0.578903820812711	-1.12689469061945	0.259787008440769	0.843100923195049
PF3D7_1138600	8.35410653469097	0.724560597843756	0.650822518601867	1.11329982773229	0.265579680412459	0.845107725494107
PF3D7_1008000	28.4437686129202	0.484878245302318	0.435723802524765	1.11281101122484	0.265789605269902	0.845107725494107
PF3D7_0919800	9.24389708051624	0.727446312541559	0.656554280383885	1.10797588908601	0.26787222889523	0.847783361585585
PF3D7_0608800	157.518617987636	0.302950957402294	0.273164919865165	1.1090404930173	0.267412713903786	0.847783361585585
PF3D7_1308900	13.0967128346307	0.642894224918497	0.580306583360623	1.10785271674056	0.267925428775902	0.847783361585585
PF3D7_1031500	12.0463965751532	0.665206968337083	0.601597461205919	1.10573433438974	0.268841524415847	0.849314462181895
PF3D7_1027300	70.5492440768224	-0.42119071949861	0.384349308308076	-1.09585398072579	0.273142680860015	0.851919067638906
PF3D7_1008900	20.4530802708835	0.543495753044193	0.495815689480612	1.09616489468804	0.273006619422579	0.851919067638906
PF3D7_0103400	8.26526065259906	0.73942645849394	0.673341912012839	1.09814411564483	0.272141564268702	0.851919067638906
PF3D7_1453000	8.3622490864147	0.732767879547804	0.665005729149698	1.10189709265325	0.270506412704627	0.851919067638906
PF3D7_1012200	12.9456755967528	-0.666429982493903	0.606389539823285	-1.09901299202508	0.271762399030656	0.851919067638906
PF3D7_0909400	13.3705023198012	0.64212764266414	0.586480611479697	1.09488298520908	0.273567904162926	0.851919067638906
PF3D7_1120600	8.32926402606551	-0.718850121251016	0.652708183251172	-1.10133462349191	0.270751047436827	0.851919067638906
PF3D7_0523400	20.2317156392643	0.558268708848495	0.507859059907809	1.09925913096802	0.271655053295812	0.851919067638906
PF3D7_1325400	31.2038527306136	0.500859188447744	0.457426681552678	1.09494965782853	0.273538692088329	0.851919067638906
PF3D7_1124600	69.9984609467312	0.355089147375109	0.325318230018278	1.09151321570623	0.275047119902275	0.852110081546304
PF3D7_0915000	7.93354347470528	0.714769438888201	0.654929120969703	1.09136915126006	0.275110480834549	0.852110081546304
PF3D7_1114700	15.4784295228476	0.630650802038642	0.577780805964011	1.0915052828493	0.275050608590037	0.852110081546304
PF3D7_1406300	19.5056019637757	0.566875497940059	0.519691004134984	1.09079336265135	0.275363817700714	0.852110081546304
PF3D7_1416500	11.4532744625026	-0.650840942058306	0.598752195185667	-1.08699550046157	0.277038798235532	0.855945343605062
PF3D7_1223400	26.7151528166375	0.504127277426073	0.464354553078174	1.08565162995441	0.277633148243208	0.856435064831874
PF3D7_1107300	67.1621530680389	0.353100748549947	0.325948703429072	1.08330158959133	0.27867457997655	0.856957041711925
PF3D7_0714300	10.3847318070224	0.682538416444119	0.62981538823647	1.08371187683311	0.278492567955937	0.856957041711925
PF3D7_1331700	10.6418478356089	0.667888799798904	0.618861090021549	1.07922247911183	0.280488561046414	0.861187535087819
PF3D7_1247500	9.24849677242912	-0.699813870915681	0.64916724342703	-1.07801784209148	0.281025793837985	0.861490928068082
PF3D7_1253400	13.1178340252303	-0.643365628237498	0.598316854282589	-1.07529250368339	0.282243791345396	0.862684713636596
PF3D7_0911600	7.87220445320487	0.704128186653021	0.654892109989222	1.07518196648393	0.282293267617471	0.862684713636596
PF3D7_1002400	13.9361662062861	0.589482925641731	0.556635267596935	1.05901109749406	0.289594725711868	0.868364248239757
PF3D7_0710000	20.6734261720091	0.548035627622782	0.51905941578119	1.05582446047719	0.291048420800191	0.868364248239757
PF3D7_1335700	8.63196345924081	0.683144024212805	0.645907872169081	1.05764932376297	0.290215346707293	0.868364248239757
PF3D7_0622800	12.7937512501386	0.618216215655327	0.581423804160068	1.06327985065629	0.287655059951833	0.868364248239757
PF3D7_0903900	44.4750495173956	-0.470530294107846	0.440838386091304	-1.06735327265805	0.285812340423061	0.868364248239757
PF3D7_1023000	8.85027815175516	-0.696023840460056	0.659127470222883	-1.05597759447758	0.290978451364397	0.868364248239757
PF3D7_0105200	8.58003887260215	0.690953528500114	0.65429743845216	1.0560235878879	0.290957438430346	0.868364248239757
PF3D7_1013100	9.49388928787254	0.663831212124727	0.626863623404597	1.05897229850307	0.289612395763002	0.868364248239757
PF3D7_0508800	13.1806101668799	0.623677578638764	0.592144174858111	1.05325291562348	0.292225092176315	0.868364248239757
PF3D7_1449500	11.6494695324861	0.644034846579434	0.607201325855086	1.0606611335581	0.288843929102185	0.868364248239757
PF3D7_0909900	8.4740600194305	0.699535239283302	0.663482480379776	1.05433867505121	0.291727887970712	0.868364248239757
PF3D7_1142600	41.2843203162377	-0.411971292684385	0.386960275737817	-1.06463458529142	0.287041322613114	0.868364248239757
PF3D7_API02900	14.5506944844224	-0.599450077702586	0.562818201412843	-1.06508651674339	0.286836780238399	0.868364248239757
PF3D7_1242800	14.0518323418329	0.606722106315395	0.574873813486018	1.05540049325999	0.291242197396848	0.868364248239757
PF3D7_0929200	30.2103462147115	-0.450342803461721	0.425691766755527	-1.05790818294203	0.290097304186434	0.868364248239757
PF3D7_0420700	10.432952600113	-0.646380340118033	0.611229187002935	-1.05750895713514	0.290279368888078	0.868364248239757
PF3D7_0624400	12.4052296775846	0.621153773098188	0.581529539589571	1.06813795484333	0.285458287260211	0.868364248239757
PF3D7_1012000	9.70866602754339	0.663512987230578	0.630387336591917	1.05254809022299	0.292548158948966	0.868364248239757
PF3D7_1457900	27.137033024496	0.483531557127881	0.456989237966759	1.05808084076381	0.290018588364129	0.868364248239757
PF3D7_0704500	9.59448580995096	0.676750575729446	0.643629970891291	1.05145907794239	0.293047794673508	0.868535319054969
PF3D7_0527000	26.791596787217	0.474904458568563	0.45333978475909	1.04756845645244	0.294837476849029	0.872523557241479
PF3D7_1237500	9.48079818630615	0.662745318662928	0.634599717384586	1.04435173938359	0.296322683201229	0.874285394129751
PF3D7_1214900	8.78477979872654	-0.68439333727198	0.655268741865652	-1.04444679494921	0.296278722971534	0.874285394129751
PF3D7_1113100	60.6180636396812	0.344064531465656	0.330790183258164	1.04012920842071	0.298279875236993	0.875691616357238
PF3D7_1439800	18.8957574333569	0.546579831874886	0.525825805537946	1.0394693948421	0.298586484658046	0.875691616357238
PF3D7_0111300	14.7627153067368	0.567704459615822	0.547342407772653	1.0372016703877	0.29964187977016	0.875691616357238
PF3D7_1251100	17.9631580642727	-0.530199320930876	0.510939480412274	-1.03769495460218	0.299412094640025	0.875691616357238
PF3D7_0707200	9.0567452899774	0.699193586389915	0.673095363387538	1.03877344046916	0.298910116341823	0.875691616357238
PF3D7_0319000	16.7068540524288	0.568068943368337	0.548007740038956	1.0366075182222	0.299918808044998	0.875691616357238
PF3D7_1309400	8.3227617468992	0.685285737967086	0.657584231443805	1.04212617212925	0.297353185894685	0.875691616357238
PF3D7_1228800	31.793839404933	0.441667970658722	0.426922698829477	1.03453850514314	0.300884485545608	0.877207736049139
PF3D7_1369600	8.58988708871446	0.688379027377701	0.666116142599321	1.03342192652997	0.30140648972103	0.877427781187887
PF3D7_1250200	23.0595538152093	-0.492023031757078	0.477259103739534	-1.03093482743831	0.302571383109901	0.878216791448974
PF3D7_0627500	25.5353631893609	-0.473277348318924	0.458946060728022	-1.03122651835854	0.30243460777071	0.878216791448974
PF3D7_0308100	7.82431103988295	-0.677912336625512	0.658446350984177	-1.02956351054606	0.303214951802286	0.87878669659512
PF3D7_0820000	15.787366060641	0.631187584170472	0.616955560544196	1.02306815034412	0.306275624587077	0.878846709038718
PF3D7_0109800	10.4564215677067	0.664117652897746	0.660240011909375	1.0058730778481	0.314476628317572	0.878846709038718
PF3D7_1124700	12.0842186759386	0.623860204765709	0.619535223178149	1.00698100999871	0.313943899995159	0.878846709038718
PF3D7_0817500	8.19121137308289	0.684814026424145	0.673875830552785	1.01623176759788	0.309519032035226	0.878846709038718
PF3D7_0401600	28.4706473523136	0.444115327112009	0.435546196845088	1.0196744463136	0.307882884742994	0.878846709038718
PF3D7_0517700	21.9579666601571	-0.506225634744976	0.493703598561842	-1.02536346953843	0.305191718176943	0.878846709038718
PF3D7_1428900	8.6280926159679	0.692617867185829	0.676520928914401	1.02379370331862	0.305932725120113	0.878846709038718
PF3D7_1130500	8.41008879496413	0.68136288511937	0.676184893401224	1.00765765660942	0.313618839380495	0.878846709038718
PF3D7_1115200	10.7754600100592	-0.616622627482834	0.613979626582003	-1.00430470456413	0.315231766718637	0.878846709038718
PF3D7_1110500	8.11785895658585	0.686088257317838	0.674106843157416	1.01777376135851	0.308785484173136	0.878846709038718
PF3D7_1231000	9.2658926618982	-0.645632613032967	0.639390889435693	-1.00976198394504	0.31260933776369	0.878846709038718
PF3D7_1329100	20.4369917635424	0.517984962607678	0.514928166876549	1.00593635370477	0.314446187318787	0.878846709038718
PF3D7_1465900	37.7911591176371	-0.411923742133668	0.40524679917837	-1.01647623860037	0.309402657048645	0.878846709038718
PF3D7_0801800	30.8617783120131	0.430915605438141	0.429139215879869	1.00413942490581	0.315311414693281	0.878846709038718
PF3D7_1011700	9.09696224520544	0.641286778694212	0.63109213119893	1.0161539765611	0.309556068793516	0.878846709038718
PF3D7_1343700	8.75431930800882	0.650631920047871	0.639621353733414	1.01721419438264	0.309051544979378	0.878846709038718
PF3D7_0310700	12.3485762875375	0.592313796967447	0.57763328692381	1.02541493084967	0.305167446079704	0.878846709038718
PF3D7_1445900	29.8571465113248	0.447511796720491	0.440934178507567	1.01491746054975	0.310145174295026	0.878846709038718
PF3D7_1412400	22.2239840529707	0.505588594511222	0.499583024539011	1.01202116500606	0.311527933814831	0.878846709038718
PF3D7_0106700	12.2910221697695	-0.613435465749713	0.607198796722269	-1.01027121440476	0.312365368422648	0.878846709038718
PF3D7_1018700	21.4159083851797	0.498183323850469	0.49558003693817	1.00525301004533	0.314775035506978	0.878846709038718
PF3D7_0213100	15.9544560527673	0.585941966373409	0.573231009535763	1.02217423102763	0.306698444825373	0.878846709038718
PF3D7_0927600	24.2614008597963	0.472190239661291	0.46288239624981	1.02010844112218	0.307677033879823	0.878846709038718
PF3D7_0204700	42.6663233249655	0.392901659564389	0.383565490271185	1.02434048299445	0.305674482927104	0.878846709038718
PF3D7_0315100	9.14697387515253	-0.636679151783134	0.629564411988544	-1.01130105142398	0.311872362996676	0.878846709038718
PF3D7_1008400	34.0571174837987	-0.433709390046347	0.431296599023614	-1.00559427324072	0.314610779814954	0.878846709038718
PF3D7_1409600	8.65539537086711	0.645056473562642	0.638995428429357	1.00948527151154	0.312741961694256	0.878846709038718
PF3D7_0104400	10.593803857988	0.612126511565023	0.61052004440777	1.00263130944179	0.316038783511186	0.879626359206062
PF3D7_0104300	26.3045622001246	-0.449389614700556	0.449698266987443	-0.999313645816438	0.31764277708912	0.882673844619764
PF3D7_1145400	19.5523181201595	-0.501624252170978	0.502942709312886	-0.997378514257201	0.3185808163382	0.882673844619764
PF3D7_1471400	16.2391380544096	0.541686685262913	0.542829828815127	0.99789410328701	0.318330711660933	0.882673844619764
PF3D7_1123100	19.5808211417777	0.548821433635315	0.550661694918445	0.996658090983789	0.318930498564902	0.882673844619764
PF3D7_1464600	36.3989049200936	-0.401751139481561	0.407214466955366	-0.986583660657608	0.323846783540477	0.882820859333337
PF3D7_API03600	14.6987498714996	-0.540630904917176	0.549367250473032	-0.984097440194455	0.325067605428629	0.882820859333337
PF3D7_1442700	10.2137801108423	0.629989076857742	0.639734839747132	0.984765933815263	0.324739057533249	0.882820859333337
PF3D7_0626800	112.991200156026	0.269684999747836	0.272312001225492	0.990352972084103	0.32200162322268	0.882820859333337
PF3D7_0219200	51.9231098634275	-0.342584026938931	0.348268159629742	-0.983678862010084	0.325273436212385	0.882820859333337
PF3D7_0721600	24.0054536856881	-0.482496006466169	0.490221306589061	-0.984241198782967	0.324996933429207	0.882820859333337
PF3D7_0304400	29.2130968127907	0.469526021243974	0.472544418580122	0.993612457966983	0.320411576716246	0.882820859333337
PF3D7_1446600	14.2007162740966	-0.556326479130625	0.564786128125783	-0.985021500044219	0.324613510253381	0.882820859333337
PF3D7_0904400	16.6177600170168	-0.547611589641771	0.555285243127636	-0.98618069977397	0.324044448453536	0.882820859333337
PF3D7_1424100	74.8533638195519	-0.324212035831358	0.32583207639283	-0.995027989326873	0.319722651619727	0.882820859333337
PF3D7_1353300	17.598860131921	0.5345876331924	0.540398382017574	0.989247286782245	0.322542167797134	0.882820859333337
PF3D7_0304800	10.5223538653651	0.643073422890585	0.6478794969878	0.99258183949398	0.32091377851757	0.882820859333337
PF3D7_1222400	15.7163752557555	0.601593697639117	0.608371577924058	0.988858979395341	0.322732142867973	0.882820859333337
PF3D7_0501200	53.0205251871556	0.36651855229691	0.371780236533021	0.985847326675626	0.324208037768212	0.882820859333337
PF3D7_1453400	11.7737607212009	0.574827773616503	0.584918617499373	0.982748294239616	0.325731335416615	0.882844240129169
PF3D7_0210900	21.514000095431	0.470889635100357	0.482076362709181	0.976794697947941	0.328670801473839	0.884919482189063
PF3D7_0911900	24.5687403198196	-0.46423015593478	0.480519297315536	-0.966100963121031	0.333993662657144	0.884919482189063
PF3D7_0318900	14.1943441373213	0.569526665198931	0.594077982770814	0.958673241082973	0.337723382913279	0.884919482189063
PF3D7_1211800	21.954418011117	-0.460757150615261	0.483955239788104	-0.95206563073271	0.34106369812458	0.884919482189063
PF3D7_0305600	13.8501465403492	0.544688200179277	0.569798828913487	0.955930711928468	0.33910724143502	0.884919482189063
PF3D7_0303200	19.3567453821449	-0.471810085511168	0.499569910460969	-0.944432552144332	0.344948653438377	0.884919482189063
PF3D7_1403100	11.8911250115504	0.568116121770331	0.591148225830008	0.961038360510448	0.336532880316253	0.884919482189063
PF3D7_0210200	24.628771959192	-0.472677740252972	0.484541264382231	-0.975515967366815	0.32930438520208	0.884919482189063
PF3D7_0716200	11.7443514367352	0.562175821553973	0.593948740069648	0.946505621828662	0.34389075622253	0.884919482189063
PF3D7_0211800	19.3079736725473	0.487066749399093	0.504255311447894	0.965912977694878	0.334087727875423	0.884919482189063
PF3D7_1252700	22.5979845816811	-0.455489517362025	0.472717456290171	-0.963555526247436	0.335268813082936	0.884919482189063
PF3D7_0723800	27.7989787160326	0.43377992077536	0.45704040345829	0.949106287962891	0.342566556661087	0.884919482189063
PF3D7_1457200	39.4053394509031	-0.37899610447505	0.390487451803556	-0.970571788477631	0.331761560166491	0.884919482189063
PF3D7_1446200	18.9039918772295	0.519014132024262	0.533491818487928	0.972862402080129	0.330621693485694	0.884919482189063
PF3D7_1223500	14.360829785103	0.53864925471355	0.552775514681701	0.974444852217658	0.329835708575554	0.884919482189063
PF3D7_0407800	14.5324077187452	-0.546675566784996	0.576623900395135	-0.948062621771979	0.343097575439898	0.884919482189063
PF3D7_1223100	37.0452061414222	-0.368865288180967	0.39160297025147	-0.941936900897604	0.346224946231645	0.884919482189063
PF3D7_1360800	25.8630320321629	0.471669068071549	0.493298394844478	0.956153664802115	0.338994605507784	0.884919482189063
PF3D7_0528400	9.5694068832539	0.628712543221322	0.642989093927917	0.977796589644497	0.328174938093302	0.884919482189063
PF3D7_0931400	13.4242698910914	0.567969106404824	0.59466526152785	0.955107256384143	0.339523459761016	0.884919482189063
PF3D7_0513800	16.9488154584584	0.503701249226374	0.529011105519735	0.952156285512202	0.341017727174843	0.884919482189063
PF3D7_0204200	15.9772322262145	-0.509681300861755	0.538005112932615	-0.947354009487995	0.343458417965978	0.884919482189063
PF3D7_0814200	179.887698214241	0.260504431465681	0.271404122501247	0.959839626107681	0.337135935511921	0.884919482189063
PF3D7_0824400	28.6828937102914	0.430499975939403	0.453527063402724	0.94922665189911	0.342505349137988	0.884919482189063
PF3D7_0208100	10.9354279013119	0.575631868791103	0.598506207709167	0.961780949598472	0.336159649428354	0.884919482189063
PF3D7_1212900	46.1280612282085	0.345349612550749	0.365447528637615	0.945004646325586	0.344656503937547	0.884919482189063
PF3D7_0731300	45.4881459178623	0.386049643822561	0.396296315031085	0.974143914995222	0.32998508740426	0.884919482189063
PF3D7_0705400	17.8780832512959	0.497641397244977	0.528945520394697	0.940817868867928	0.346798202170935	0.884919482189063
PF3D7_1209300	11.9255324335687	-0.583411238656301	0.614964607465189	-0.948690756466542	0.3427779166649	0.884919482189063
PF3D7_1431200	10.1510304923428	-0.618243121139631	0.643071924808795	-0.961390316213002	0.336355951502854	0.884919482189063
PF3D7_0830400	62.2698373890365	-0.354982013687698	0.376318842852834	-0.943301193734058	0.345526865463759	0.884919482189063
PF3D7_1423600	10.2736332143884	0.592485053012452	0.630067812618211	0.940351246559341	0.347037421101618	0.884919482189063
PF3D7_1434800	19.4720287127938	-0.496244550397442	0.517096474019511	-0.959674983934851	0.33721881735983	0.884919482189063
PF3D7_1359900	14.1528452064519	0.566618640286443	0.589618217834116	0.960992423822727	0.336555977194092	0.884919482189063
PF3D7_0705500	33.6119722130815	0.410709366724524	0.425381223938942	0.96550892143626	0.334289969663062	0.884919482189063
PF3D7_0530200	12.3449681992747	0.557834458732114	0.577626084804459	0.965736266777071	0.334176167066686	0.884919482189063
PF3D7_1113200	8.24359228760659	-0.62457478360327	0.662835909167076	-0.942276625278366	0.346051032268137	0.884919482189063
PF3D7_1434300	13.194456617404	0.538668794595168	0.56712890584787	0.949817209175483	0.342205140010037	0.884919482189063
PF3D7_1460300	32.4444901806748	-0.414879142385941	0.42859757384506	-0.967992279246831	0.333048225630654	0.884919482189063
PF3D7_1029900	35.1443871501515	0.419246473989009	0.44600237473815	0.940009510566285	0.347212682324564	0.884919482189063
PF3D7_1218400	28.9892763893055	0.412318185412484	0.436485387912399	0.944632275972625	0.344846643171862	0.884919482189063
PF3D7_1105100	4266.03033673945	-0.159641014117069	0.166078149890402	-0.961240321032107	0.336431347051941	0.884919482189063
PF3D7_0827600	9.14244934081561	-0.587770337927428	0.622536450325752	-0.944154093499052	0.345090910151549	0.884919482189063
PF3D7_0310600	9.40684003186632	-0.626025131890369	0.649665431663817	-0.963611578173546	0.335240699846039	0.884919482189063
PF3D7_1303500	20.2476922328292	0.523567649504334	0.539001343190798	0.971366131306653	0.331365987925477	0.884919482189063
PF3D7_0831400	9.36307543566133	-0.624322322560094	0.653363394390284	-0.955551425011666	0.339298912578079	0.884919482189063
PF3D7_0102900	17.2522439036529	0.490242964386287	0.523101980821646	0.937184301264264	0.348663763595946	0.887466703971547
PF3D7_0217900	8.85455062727855	0.607429245546957	0.648892727878041	0.936101175818884	0.349221097708554	0.887735390682158
PF3D7_0615300	9.97306664771813	0.582987919197893	0.627704905991626	0.928761132234437	0.35301289151237	0.889320938233086
PF3D7_1303400	9.76495405140256	0.575868716062549	0.617197578069596	0.933037873971717	0.350800413750824	0.889320938233086
PF3D7_1312700	13.0402041110532	0.530756874493227	0.571135598480851	0.929300985448943	0.352733124664766	0.889320938233086
PF3D7_1003500	63.807654678827	-0.303292561876993	0.324868285439022	-0.933586242397062	0.350517364668937	0.889320938233086
PF3D7_0929100	12.5838371207699	-0.538139873602275	0.578642429752101	-0.930004171717622	0.352368924541628	0.889320938233086
PF3D7_1207100	8.20693451423602	0.609864395514652	0.654622285490788	0.931627915871243	0.351528851076562	0.889320938233086
PF3D7_0627700	50.0926546725076	0.334083017671495	0.359615236141485	0.929001288310418	0.352888418674275	0.889320938233086
PF3D7_0523000	34.2751214681817	-0.399433464304895	0.431368586624345	-0.925967900051886	0.354462662410438	0.890538550733175
PF3D7_0708400	168.322242299621	0.222665401890832	0.241779199745454	0.920945234847561	0.357079020180838	0.890538550733175
PF3D7_0703600	12.8433751306425	0.546815297162554	0.596839501184011	0.916184830390382	0.359569960493717	0.890538550733175
PF3D7_1463200	11.1968378582253	-0.551159437901152	0.599554169745307	-0.919282136150077	0.357948019080495	0.890538550733175
PF3D7_0927900	25.4640643647305	-0.421712671474803	0.457584652235468	-0.921605804334962	0.356734229787871	0.890538550733175
PF3D7_1108600	82.1984695812073	0.28673851675986	0.312982771868983	0.916147924205525	0.359589314653654	0.890538550733175
PF3D7_1223600	12.1362019118951	0.546274137223122	0.595104651301529	0.917946341082006	0.358646958818099	0.890538550733175
PF3D7_0922800	24.1805437785184	0.447199858856797	0.486947727019126	0.918373439371722	0.358423391173742	0.890538550733175
PF3D7_1124900	44.6497731502069	-0.34446309508324	0.376187736949484	-0.915668059454835	0.359841022535441	0.890538550733175
PF3D7_1213900	19.3949584189843	-0.471612149513865	0.510688586682079	-0.923482846127243	0.355755635725571	0.890538550733175
PF3D7_1346200	13.9331159404229	-0.515416534117491	0.562120904443165	-0.916914012703479	0.359187700491927	0.890538550733175
PF3D7_1435300	10.3601197410277	0.580828678837602	0.629571042976074	0.922578452928744	0.35622692876844	0.890538550733175
PF3D7_0602400	11.1602139542114	0.585183947297071	0.638578287171054	0.916385600721685	0.35946468496741	0.890538550733175
PF3D7_1115600	15.7117108908941	-0.49959412329252	0.541523729334685	-0.922571064256631	0.356230780737981	0.890538550733175
PF3D7_1138800	14.8126688910594	0.536820423728779	0.587110315942089	0.914343368106872	0.36053644927694	0.891137261420361
PF3D7_0936600	9.36819501174442	-0.581159940797783	0.638307895240592	-0.910469610561108	0.36257490132483	0.892848837467873
PF3D7_0317300	33.1557771794905	0.415757903871671	0.456158369153308	0.911433247719152	0.362067142175665	0.892848837467873
PF3D7_0518500	8.32001145539273	0.618675698282036	0.679537013437968	0.910437085909394	0.362592046971686	0.892848837467873
PF3D7_1132400	19.7085516486738	0.471024705896616	0.522520009084323	0.901448169845307	0.367350079703745	0.896623403456874
PF3D7_1434700	8.04385959153813	-0.613017427211925	0.681802921494758	-0.899112350337205	0.368592820335362	0.896623403456874
PF3D7_0527600	12.3540016272066	0.537467269362468	0.596790065994305	0.900596876502964	0.367802695946549	0.896623403456874
PF3D7_1452600	15.5094418605241	0.489914183146638	0.541644565166913	0.904493859355288	0.365733589003784	0.896623403456874
PF3D7_0719500	13.0635342014065	0.519962947275491	0.577104843192587	0.900985242818302	0.367596166007431	0.896623403456874
PF3D7_0718500	16.308560188411	0.479952169540133	0.530812349580715	0.90418425629932	0.365897706907273	0.896623403456874
PF3D7_0810600	21.9004680761185	0.439602946190605	0.489960080656473	0.897221964698845	0.369600486921154	0.896623403456874
PF3D7_0817800	12.4680354579727	-0.542926346332485	0.604895367637343	-0.897554148005956	0.369423293319226	0.896623403456874
PF3D7_0504400	10.723283364607	0.559304456968055	0.620884824311652	0.900818372534924	0.367684897367415	0.896623403456874
PF3D7_0218200	7.74177463115499	0.611200110852669	0.678716285010755	0.900523715653859	0.367841610357888	0.896623403456874
PF3D7_0711500	14.3110505967119	-0.580018659879445	0.645382625978978	-0.898720598497082	0.368801502387197	0.896623403456874
PF3D7_0515000	11.0341907413372	0.549161213726023	0.605912947187847	0.906336819958677	0.364757602523354	0.896623403456874
PF3D7_0919400	13.2970142126745	0.521399087400975	0.58334437386614	0.893810090162316	0.371423509591426	0.897721028717283
PF3D7_0914600	13.4317056506719	0.525229562208338	0.587363265809366	0.894215884414546	0.371206394997122	0.897721028717283
PF3D7_1364000	9.08904936903997	0.567098026959175	0.633551179154717	0.895110048908434	0.37072826269129	0.897721028717283
PF3D7_1307600	10.9045758708469	0.563932941883287	0.631936540189992	0.892388564386133	0.372184698443519	0.898455690960092
PF3D7_0912400	32.7810846187507	0.375068715153514	0.421543388369229	0.889751151369006	0.373599521338654	0.899660612047125
PF3D7_0318500	8.83643170123104	-0.596516413583999	0.670074669702438	-0.890223792296007	0.37334573169328	0.899660612047125
PF3D7_1321300	16.5490951157089	0.468003106671191	0.527003143032364	0.888046139494182	0.374515932908122	0.900763535085017
PF3D7_1455200	8.42972578796606	0.573472553961883	0.647507334436359	0.885661865839834	0.375799763317058	0.901644120779021
PF3D7_1419000	16.9931493631644	0.484705817824596	0.547144466497954	0.885882701011303	0.375680738862717	0.901644120779021
PF3D7_0824700	9.63662082979514	0.557774499685489	0.632719285861663	0.881551285300066	0.378019508644405	0.902561767298002
PF3D7_0930500	9.72133985611736	-0.570658617608994	0.646485089587691	-0.882709635225992	0.377393174908017	0.902561767298002
PF3D7_0609700	11.3467600068075	-0.532622528675892	0.603974675397295	-0.881862353459658	0.377851247493922	0.902561767298002
PF3D7_1114900	8.41803382012966	-0.609025632048815	0.689425738543184	-0.883381048894024	0.377030426484077	0.902561767298002
PF3D7_0811400	26.2129688635462	0.401259475608348	0.45648166440577	0.87902649086835	0.379386912533379	0.904727285349623
PF3D7_0806800	34.122447561839	-0.353878599097513	0.406149534449004	-0.871301255035529	0.383589685400219	0.905654183142354
PF3D7_1343300	21.3247947130256	0.423952659179697	0.487146734030702	0.870277125070447	0.384148976700251	0.905654183142354
PF3D7_0715900	26.6247788526992	0.417567978020837	0.477275786262452	0.87489872740206	0.381629011579391	0.905654183142354
PF3D7_1432100	25.8057598235162	0.396636781139341	0.457313562295094	0.867319086599493	0.385767201674377	0.905654183142354
PF3D7_1334200	10.1709832638226	0.567549019429265	0.653132622514366	0.868964433661836	0.38486658458537	0.905654183142354
PF3D7_0707900	9.31796857990845	-0.547280970284908	0.630564575085399	-0.867922163579817	0.385436944812875	0.905654183142354
PF3D7_1315400	44.0548182712094	0.3680090113343	0.421609445394236	0.872867093834161	0.382735524014488	0.905654183142354
PF3D7_1349200	13.3646363706003	0.496405441189219	0.569088105655937	0.872282228807184	0.383054430041004	0.905654183142354
PF3D7_0605900	11.2401704711477	-0.51819175078112	0.595962822127004	-0.869503485018885	0.384571802716631	0.905654183142354
PF3D7_0211700	7.82996682218289	0.585963772688642	0.670802532924558	0.873526476016664	0.382376181634052	0.905654183142354
PF3D7_0729100	20.3844993396123	0.46276636467444	0.527738290371495	0.876886087512584	0.380548513591513	0.905654183142354
PF3D7_1231800	20.127356106571	0.480309802244864	0.549473092867844	0.874127975471924	0.382048563972213	0.905654183142354
PF3D7_1012100	8.25089448128395	-0.597526272882869	0.686817644497288	-0.869992606727838	0.384304444561275	0.905654183142354
PF3D7_1439100	10.748972810413	0.527860480311131	0.609625023163774	0.865877318440261	0.386557442649832	0.906426461583436
PF3D7_1237100	9.39588179680496	0.556311239449366	0.643308415476807	0.864765991032528	0.387167240978647	0.906774289062027
PF3D7_0307100	17.3683321709695	-0.468067053880059	0.542445431264724	-0.862883207973104	0.388201684036442	0.907034850334849
PF3D7_1111100	9.12922347907135	0.557072486441247	0.645276989363179	0.863307534011121	0.387968402985692	0.907034850334849
PF3D7_0209700	9.06142441990796	0.559968924788295	0.666003016313459	0.840790373424888	0.400465381046161	0.907313896524429
PF3D7_0513200	15.5678264848258	0.459161070495981	0.543025322904585	0.845561065255626	0.397797653353373	0.907313896524429
PF3D7_1227600	14.5562751319787	0.496140789774282	0.587752944246916	0.844131526061488	0.398595912604509	0.907313896524429
PF3D7_0220200	61.590435377946	0.315074339720626	0.374332271123556	0.841696973586948	0.399957592712108	0.907313896524429
PF3D7_0911000	11.6963399348728	-0.492426985068981	0.583934731634912	-0.843291139217347	0.399065637195825	0.907313896524429
PF3D7_0821400	30.0628273834418	-0.359665682643953	0.42907598769776	-0.838233070495897	0.401899817075455	0.907313896524429
PF3D7_1433000	7.74235958039791	0.580181124677878	0.685180859432094	0.846756176403929	0.397131039534645	0.907313896524429
PF3D7_0609100	14.2899053025004	0.468280048395577	0.555026373867096	0.84370774154907	0.398832740470083	0.907313896524429
PF3D7_0917000	8.86849936222202	0.537275857833131	0.637540073203699	0.842732685230701	0.399377962825764	0.907313896524429
PF3D7_1212600	11.7986611120716	0.531631768529193	0.619445313093006	0.858238422815173	0.390760823550111	0.907313896524429
PF3D7_0716900	12.0070108935314	0.519479147706998	0.61638190309625	0.842787799410587	0.399347132670884	0.907313896524429
PF3D7_0606700	11.1660888792523	0.523041377087374	0.610103671616954	0.857299179500364	0.391279561865307	0.907313896524429
PF3D7_1114200	10.1314265787927	-0.512641918693851	0.608203335926308	-0.842879162958035	0.399296028246146	0.907313896524429
PF3D7_1419400	10.8624993369414	0.521316551157482	0.612975958266484	0.850468185786246	0.395064840896721	0.907313896524429
PF3D7_1451700	10.5015696340675	0.537296356707321	0.623975122060758	0.861086183905587	0.389190577974842	0.907313896524429
PF3D7_0927800	12.6788902146388	-0.494685787472243	0.586023736648852	-0.844139505851894	0.398591453988487	0.907313896524429
PF3D7_0301500	7.88017581530894	0.558916212258423	0.656924876931317	0.850806891146031	0.394876633012437	0.907313896524429
PF3D7_0917900	216.268030134106	-0.201868040689063	0.23519638798165	-0.858295666959023	0.390729221473515	0.907313896524429
PF3D7_0527200	17.7384761795284	0.433072416420538	0.51686462822447	0.837883640651181	0.402096057498022	0.907313896524429
PF3D7_1220900	41.0582392977634	0.337359683472123	0.396946463644665	0.849887111663798	0.395387851759108	0.907313896524429
PF3D7_1449100	11.24105383777	-0.519870221731411	0.618469779981307	-0.840574978048441	0.400586081304166	0.907313896524429
PF3D7_1135400	17.182338314923	0.44961793578086	0.525484154272756	0.855626058607055	0.392204651344526	0.907313896524429
PF3D7_0519400	47.7716540701289	-0.31093499359739	0.363509293091667	-0.855370136352967	0.392346270840131	0.907313896524429
PF3D7_1132200	10.4239554382437	0.517294178630943	0.614335787892033	0.842038163535827	0.39976659193408	0.907313896524429
PF3D7_0522600	10.3966164172819	-0.516138192988135	0.610971832934099	-0.844782304463138	0.398232396322303	0.907313896524429
PF3D7_0626840	33.2621666235515	-0.413156269199689	0.491584537648559	-0.840458227543074	0.400651513458398	0.907313896524429
PF3D7_0730900	16.9189623778502	-0.500399612988774	0.592717668996799	-0.84424615489483	0.398531867946559	0.907313896524429
PF3D7_1306400	21.5319314240444	0.41127241303748	0.490927192220925	0.837746247415851	0.402173233523042	0.907313896524429
PF3D7_0419400	10.7137571793483	0.532054352599086	0.624540657926241	0.851913075388477	0.394262339114065	0.907313896524429
PF3D7_1203400	10.7843925471699	0.525006514772372	0.626091503139234	0.838545982719746	0.40172413378935	0.907313896524429
PF3D7_0526600	22.0037105581689	-0.404095130356375	0.485128939821372	-0.832964387787638	0.404864814165661	0.909382236208613
PF3D7_1456700	13.9624168244815	0.474852484665323	0.570168074658281	0.8328289600394	0.404941199329535	0.909382236208613
PF3D7_1013500	15.2421124130166	0.464657406249034	0.55790950652665	0.832854433941858	0.404926830654442	0.909382236208613
PF3D7_1213800	15.3262726636552	0.451299604588389	0.540920606265479	0.834317641740748	0.404102013108058	0.909382236208613
PF3D7_0622900	8.83161114622063	0.52698428547319	0.635789111609656	0.828866483949371	0.407179962553664	0.911766326718107
PF3D7_0321900	13.2622654423122	0.479464812530151	0.578723488567019	0.828486871540945	0.407394826899999	0.911766326718107
PF3D7_1417500	8.4942227086642	-0.549086145966562	0.662360132869103	-0.828984292258232	0.407113295638855	0.911766326718107
PF3D7_1463000	21.1363533058271	0.470103124028676	0.570579148556207	0.823905193903817	0.4099934290215	0.912386283156567
PF3D7_0920700	9.65461850352374	-0.515553133899101	0.625134602921856	-0.824707401397115	0.409537728657603	0.912386283156567
PF3D7_1428200	15.9379160763186	-0.447157146641655	0.542237098335399	-0.824652440813017	0.409568939839874	0.912386283156567
PF3D7_0820300	17.544430570076	0.444981763124303	0.538094888982483	0.826957795428509	0.408260983280253	0.912386283156567
PF3D7_1014600	36.1033132630368	-0.336007232834779	0.407212977146965	-0.825138813573498	0.409292786145857	0.912386283156567
PF3D7_0409500	12.0617543501184	0.495074657032559	0.604265970690726	0.819299250736638	0.412615699970305	0.913051633380236
PF3D7_0320100	20.5774282251803	-0.404336686637518	0.492075740241655	-0.821696038985689	0.411249914105519	0.913051633380236
PF3D7_1331600	7.72007395378322	0.562145684325365	0.684930965945456	0.820733347264272	0.411798171615932	0.913051633380236
PF3D7_1430900	8.41586880462457	-0.525133794464716	0.640332022309861	-0.820096100411171	0.412161325107717	0.913051633380236
PF3D7_0809900	16.8956088961784	0.436965012459186	0.532886584093513	0.819996272194583	0.412218232295036	0.913051633380236
PF3D7_1126200	40.2417448986221	-0.343181871379645	0.427338238378941	-0.803068484302894	0.421935152297334	0.913376480368124
PF3D7_1438000	15.5717726490539	-0.430731986899106	0.537858191366964	-0.800828162167435	0.42323113296663	0.913376480368124
PF3D7_1138700	8.68234045537581	-0.505411441589113	0.632134029383123	-0.799532089867597	0.423981947128877	0.913376480368124
PF3D7_1347700	18.2817428523809	0.422590294635808	0.520670683461524	0.811626826819482	0.41700579306518	0.913376480368124
PF3D7_0315400	14.5478103860221	0.447338168909651	0.558435024315492	0.801056791625814	0.42309876881771	0.913376480368124
PF3D7_0309600	129.119619913114	-0.239802507180565	0.299960386599997	-0.799447253347976	0.42403112004004	0.913376480368124
PF3D7_1127800	8.97997819471327	-0.514712661513551	0.6435728038831	-0.799773791570977	0.423841870367366	0.913376480368124
PF3D7_0305300	15.8747449297425	0.443211423812852	0.549139886968078	0.807101130933905	0.419608220608749	0.913376480368124
PF3D7_0818900	289.072840952808	-0.198550749403368	0.243954975949489	-0.813882761073413	0.415712117311031	0.913376480368124
PF3D7_1328100	25.7952577529607	0.364120382077851	0.449617584005776	0.809844621364216	0.418029483337069	0.913376480368124
PF3D7_1459000	12.8268271088057	0.500542449587556	0.615093885685679	0.813765932707287	0.415779054822192	0.913376480368124
PF3D7_0904900	28.6889981475113	0.354915261668004	0.438025986894772	0.810260743167428	0.417790332616195	0.913376480368124
PF3D7_0903200	55.3326301597575	0.295363130460753	0.368152888905976	0.802283886291021	0.422388761304301	0.913376480368124
PF3D7_1006500	10.3043821933614	-0.51357238305265	0.633307311733158	-0.810937081473397	0.417401804030805	0.913376480368124
PF3D7_0406100	19.1795479322653	0.428510045865098	0.535232131880564	0.800605980734951	0.423359787277142	0.913376480368124
PF3D7_1243500	9.89105274861123	-0.518186354328631	0.639315630917824	-0.81053290310563	0.417633962295863	0.913376480368124
PF3D7_1132300	9.37245679107122	-0.514953949873689	0.632073681895356	-0.814705570922573	0.415240863761232	0.913376480368124
PF3D7_1108700	41.721502300552	0.313690734668806	0.392140345551369	0.799945066166913	0.423742625600968	0.913376480368124
PF3D7_1310600	8.19806908931309	-0.524968095552778	0.65515552343249	-0.801287750429647	0.422965080714509	0.913376480368124
PF3D7_0730300	53.9685001570836	-0.300803781521383	0.37301849520778	-0.806404468909321	0.420009671010426	0.913376480368124
PF3D7_0704700	8.88051275721865	0.515458875779641	0.645259044534569	0.798840217964626	0.424383066959846	0.913376480368124
PF3D7_1318800	24.0645179026337	-0.388563868583232	0.48208922673682	-0.805999900087698	0.420242906709398	0.913376480368124
PF3D7_1454700	14.5312550179787	0.462915762568554	0.570784018025447	0.811017386523805	0.417355686224771	0.913376480368124
PF3D7_0703700	11.1403631673838	-0.484789198785238	0.601951912757339	-0.805362004025509	0.420610811101851	0.913376480368124
PF3D7_0821300	11.9612507739166	-0.56940069986606	0.701974771628441	-0.811141258745188	0.417284554433256	0.913376480368124
PF3D7_1447100	10.4237255993062	0.474135699103554	0.615001858065093	0.770950027037757	0.440736552769613	0.913818655177634
PF3D7_1119300	9.8991621980508	0.490013751282158	0.631330636930682	0.776160259962103	0.437654367110173	0.913818655177634
PF3D7_0415400	9.46704286085838	-0.477239935509661	0.619103787646313	-0.77085610689609	0.440792226462891	0.913818655177634
PF3D7_0111500	17.7684002778178	-0.395030431238234	0.51027878885916	-0.77414628995536	0.438844286043875	0.913818655177634
PF3D7_1458000	11.7738616120221	-0.48666708791032	0.626472510963448	-0.776837098824781	0.437254885885082	0.913818655177634
PF3D7_1021000	10.6170745091187	0.475140559035914	0.606223467098696	0.783771306824978	0.433174313034024	0.913818655177634
PF3D7_0903300	61.51546736425	0.273342513778728	0.351959907285095	0.776629690259905	0.437377279457393	0.913818655177634
PF3D7_1338200	51.3914536079129	0.307987910671109	0.389596737861195	0.790530003823695	0.429218306893136	0.913818655177634
PF3D7_0524100	22.2822544166138	-0.380836994961898	0.479670411710376	-0.793955569625268	0.42722129740753	0.913818655177634
PF3D7_0904700	15.5962598839947	0.4335886969572	0.551078219770929	0.786800641726383	0.431398577786663	0.913818655177634
PF3D7_1237200	8.89648907384862	-0.50103292948189	0.631968798612881	-0.79281276319593	0.427886919250366	0.913818655177634
PF3D7_0804000	28.7146262703587	-0.343289827153633	0.432710593956632	-0.793347405744447	0.427575444267639	0.913818655177634
PF3D7_1239000	9.1894156118668	-0.48534180894192	0.627578504413234	-0.773356329971337	0.439311527136677	0.913818655177634
PF3D7_0307700	22.9126729566503	0.365123508267995	0.473367836206523	0.771331468555242	0.440510484470704	0.913818655177634
PF3D7_0310500	10.44081556181	0.498312390954561	0.646543439201282	0.770733040876819	0.440865183261271	0.913818655177634
PF3D7_0319700	8.08240295376631	-0.520618213643739	0.673252820166841	-0.773287831924302	0.439352055431235	0.913818655177634
PF3D7_1108400	39.2897202776155	0.306712463902402	0.390990462260819	0.784449989211763	0.432776115922502	0.913818655177634
PF3D7_0920500	8.2511143910974	-0.523699517102469	0.67477367330754	-0.776111365660503	0.437683233447139	0.913818655177634
PF3D7_1312800	19.065695698135	-0.400893542820124	0.515291389498597	-0.777993871021622	0.436572626426178	0.913818655177634
PF3D7_0517000	29.0282273363926	0.358025654471818	0.455201534591701	0.786521193943148	0.431562207560516	0.913818655177634
PF3D7_0206100	11.0397597394128	0.479151180551641	0.605110581453947	0.791840690341833	0.428453573067883	0.913818655177634
PF3D7_1210000	10.9475429542022	0.464007631659668	0.598236278927644	0.775626032729768	0.437969824883492	0.913818655177634
PF3D7_0309200	22.3859780824881	0.418254894941163	0.534476563879505	0.782550486227599	0.433891127226217	0.913818655177634
PF3D7_1350500	8.20066804944797	-0.541914771376946	0.686586793791025	-0.789288078765301	0.429943652614062	0.913818655177634
PF3D7_0528200	18.9363708728775	0.419084737385666	0.541010622840056	0.774633102739583	0.438556491002463	0.913818655177634
PF3D7_1302300	36.1102102457287	0.322330734232762	0.413671575701747	0.779194784379284	0.435864982004847	0.913818655177634
PF3D7_1362400	10.5138202142083	0.494679277883058	0.628024096287892	0.78767563347807	0.430886461791595	0.913818655177634
PF3D7_0321800	16.5495189678354	0.424541841945978	0.542761435364804	0.78218866390283	0.434103705622716	0.913818655177634
PF3D7_0615600	15.7152612602908	0.44603865819712	0.575815674179571	0.774620556886788	0.438563906524982	0.913818655177634
PF3D7_0615900	13.4472676947087	0.447047288071279	0.567850110711424	0.787262835101328	0.431128020859076	0.913818655177634
PF3D7_1136500	25.6360467676431	0.350936866939831	0.453233768338584	0.774295499265771	0.438756064628505	0.913818655177634
PF3D7_0404700	13.3395211778407	-0.439234413669182	0.559921512030823	-0.784457114491081	0.432771936496622	0.913818655177634
PF3D7_0807300	31.6264491615151	-0.334405182597718	0.4266632031517	-0.783768509042999	0.433175954989617	0.913818655177634
PF3D7_1474800	30.5273923881559	-0.342202471894943	0.430592504279841	-0.794724637548606	0.426773697472798	0.913818655177634
PF3D7_1343000	466.208746976452	-0.176971409538174	0.227797964458739	-0.776878801172207	0.437230279353221	0.913818655177634
PF3D7_1447200	9.7437459679784	0.485355239962788	0.630841984262653	0.769376883705808	0.441669607397977	0.914521368321418
PF3D7_1326000	9.02736831789099	-0.504756076709613	0.660540419948114	-0.764156229454151	0.444774147014862	0.919012827428186
PF3D7_0908400	8.10014070950474	0.515797787986781	0.67446946654137	0.7647459426618	0.444422842911457	0.919012827428186
PF3D7_0717300	12.4686312667915	0.439846293655717	0.578254871414011	0.760644337643291	0.446869529706481	0.922372506169366
PF3D7_0303500	12.5121349059544	0.493477488406018	0.652349549139125	0.756461760504376	0.449372390939614	0.922763646617976
PF3D7_0805600	19.130133946683	-0.396818769115768	0.526765684623618	-0.753311729862019	0.451262611745975	0.922763646617976
PF3D7_0624000	50.1922374862493	-0.269757521503731	0.355347578361105	-0.759137075727032	0.447770562494461	0.922763646617976
PF3D7_0918000	95.9017878805282	-0.231377124562535	0.306219584084271	-0.755592184786131	0.449893743052887	0.922763646617976
PF3D7_1359000	11.737321927192	0.461694770523367	0.610549060979491	0.756196020976069	0.449531678091925	0.922763646617976
PF3D7_0103200	22.5476585390665	0.411567666889273	0.543838999722554	0.756782185719007	0.449180367172797	0.922763646617976
PF3D7_1149100	36.1389244651433	0.327908221201145	0.435242914423331	0.753391291011832	0.451214814629918	0.922763646617976
PF3D7_0531100	9.66507740212415	-0.480944559609539	0.638472477129671	-0.753273753900376	0.451285427175509	0.922763646617976
PF3D7_1362700	9.7158911799089	0.46849557779552	0.618882912519941	0.757001960011983	0.449048688202099	0.922763646617976
PF3D7_1231600	10.7264567411674	-0.473712610963439	0.629847474248637	-0.752106867664341	0.45198679426414	0.92323705896989
PF3D7_0310400	17.1576832403525	0.389269397414463	0.518758541740531	0.750386482521121	0.453021969783693	0.923622788939802
PF3D7_1365700	15.6741368348286	0.401304912242643	0.534908604075582	0.750230804262665	0.453115709179628	0.923622788939802
PF3D7_0707420	11.6452301364145	-0.445445404560675	0.595971827034721	-0.747426949319072	0.454805883033892	0.926107316229634
PF3D7_1332900	12.9753818323438	-0.416784639583605	0.566304835475446	-0.735972242288361	0.461747590539353	0.927703326267761
PF3D7_0718400	15.0889441923696	-0.416117663348545	0.558795294592797	-0.744669232857046	0.456471703206288	0.927703326267761
PF3D7_0623800	15.0602141688339	-0.418690477030452	0.566516736190869	-0.739061090843728	0.459869902159725	0.927703326267761
PF3D7_0528100	22.0290193238035	-0.350645559720607	0.472194691761003	-0.742586830895767	0.457731863913484	0.927703326267761
PF3D7_1229400	50.7524405340751	-0.266067551039014	0.361186152926598	-0.736649367322465	0.461335605192711	0.927703326267761
PF3D7_1251600	8.16604727391796	0.476011648289683	0.64948503771205	0.732906257496764	0.463615606307858	0.927703326267761
PF3D7_0413700	21.8251785217066	0.417462917200731	0.565623118865809	0.73805844081803	0.460478936810561	0.927703326267761
PF3D7_1425700	9.71654487097291	0.455601665318866	0.620610454746039	0.734118579270959	0.462876470995059	0.927703326267761
PF3D7_0925700	10.3488616949888	0.470561872715101	0.635244425671963	0.740757185263514	0.458840679276996	0.927703326267761
PF3D7_1238100	11.6301117799201	0.449396245966543	0.606446602338377	0.741031847212485	0.458674130641997	0.927703326267761
PF3D7_1466300	26.4932537219904	0.346565038636836	0.47243335685517	0.733574447290942	0.463208139210082	0.927703326267761
PF3D7_1440800	8.10660074716772	0.489061004710466	0.662666684760172	0.738019604663638	0.460502535931778	0.927703326267761
PF3D7_0321500	9.7010844848299	0.454622423046286	0.617661984105236	0.736037565441017	0.461707836813465	0.927703326267761
PF3D7_1334500	13.3479959934682	0.433600557238126	0.591588489548222	0.732942856223003	0.463593282965313	0.927703326267761
PF3D7_1308000	15.1501320458776	-0.401289332504727	0.545177439270057	-0.736071054301178	0.461687457231312	0.927703326267761
PF3D7_0305100	13.7603832588991	0.41321418161893	0.559160553802745	0.738990221697041	0.459912935034754	0.927703326267761
PF3D7_0921700	9.78947343534343	0.487274462656025	0.655122602407948	0.743791255049077	0.457002771498039	0.927703326267761
PF3D7_1351200	14.0386211903788	0.418034821627299	0.571836908308587	0.731038545349909	0.464755609443105	0.929038425794203
PF3D7_1344800	11.3291776137353	-0.455507673505099	0.624256822862139	-0.729679927912767	0.465585853062876	0.929752237061537
PF3D7_1443800	8.09269485742092	0.477854905384809	0.655970524768445	0.728470087209314	0.46632587321272	0.929807681831616
PF3D7_0512600	25.9806077694559	0.352992815006648	0.487225560369651	0.724495682736424	0.468761476699201	0.929807681831616
PF3D7_0518200	9.99619953827175	-0.446781488313663	0.617028741216217	-0.724085376368398	0.469013321840047	0.929807681831616
PF3D7_0524400	13.5193452048362	-0.403656050996077	0.55795436175647	-0.723457111662944	0.469399094339421	0.929807681831616
PF3D7_0611600	8.87755836001988	0.461062613655414	0.637040466062064	0.723757183755568	0.469214819608294	0.929807681831616
PF3D7_0503400	83.4628093937023	-0.225261966882061	0.311046061628388	-0.724207744996899	0.468938204414695	0.929807681831616
PF3D7_0508300	30.437892815	-0.31335416893914	0.432168548286717	-0.725073979079219	0.468406646786232	0.929807681831616
PF3D7_0530300	11.6792000579005	0.430326173435257	0.59183262942486	0.727107888345807	0.467159866780743	0.929807681831616
PF3D7_1445500	10.780715276772	-0.435788605306262	0.604031568471295	-0.721466605477544	0.470622479784691	0.931292218305053
PF3D7_0520800	15.5065635513531	0.401955814521065	0.561803392131343	0.71547416792224	0.474316097328547	0.936182774939006
PF3D7_1120200	15.270042358662	-0.402022082048589	0.563824595167168	-0.713026862422334	0.475829134873312	0.936182774939006
PF3D7_0307400	10.714512528306	0.42886401939651	0.60111562273036	0.713446803209911	0.475569320098314	0.936182774939006
PF3D7_0923900	34.118942084754	-0.292711068186173	0.409574397049195	-0.714671303418935	0.474812173798031	0.936182774939006
PF3D7_1364200	9.64555950572588	-0.449224761573831	0.627461985532337	-0.71593940658048	0.474028764548113	0.936182774939006
PF3D7_0818500	37.3079507706862	-0.28645678573128	0.401859858555388	-0.712827568200116	0.475952464205632	0.936182774939006
PF3D7_0921900	8.53123875611861	0.472234249422489	0.663426043928791	0.711811442652944	0.476581545994229	0.93648273787866
PF3D7_0201900	24.0293280048142	-0.33148000215195	0.466804465692038	-0.710104608062245	0.47763926897787	0.937623540001513
PF3D7_0721400	11.0354032080848	-0.422131294687036	0.595642964575777	-0.708698532161262	0.478511575926377	0.93839844979574
PF3D7_1206200	21.1798308800309	0.358389959450418	0.50848043182707	0.704825470200797	0.480918855903331	0.940223139756957
PF3D7_1429800	13.4230465647679	0.416662088016537	0.590458435147749	0.705658625932368	0.480400456477739	0.940223139756957
PF3D7_1313800	10.1280487697815	0.444799937454254	0.631707422326983	0.704123335793286	0.48135596875089	0.940223139756957
PF3D7_1447900	22.3800100122471	0.347582716911803	0.492337413587152	0.705984772474081	0.480197607184717	0.940223139756957
PF3D7_1013200	14.7289416317665	0.38432741500575	0.550614604106909	0.697997132911368	0.485178987091326	0.940259528776535
PF3D7_0623000	9.23506680499256	0.449070336839364	0.643404731278977	0.697959332606538	0.485202627063311	0.940259528776535
PF3D7_1440700	10.675883148926	0.441665448008295	0.631812713205899	0.699044889057753	0.484523978091589	0.940259528776535
PF3D7_1366800	12.4445886726771	0.437048839273522	0.623483927381367	0.700978517776918	0.483316421733967	0.940259528776535
PF3D7_1129200	20.9584133107118	0.360850270389307	0.516009835883316	0.699308899357697	0.484359006613564	0.940259528776535
PF3D7_0818000	15.6119211892193	-0.404467593424198	0.579318227916636	-0.698178607082256	0.485065503456048	0.940259528776535
PF3D7_0205900	26.9714454307944	0.323308702743206	0.462486875366628	0.699065681565361	0.484510984422936	0.940259528776535
PF3D7_0319400	10.6781146729256	-0.424556733409843	0.607452723755654	-0.698913210537549	0.484606271111389	0.940259528776535
PF3D7_1455400	9.90903598402907	0.439481332168668	0.634342714934814	0.692813713820029	0.488426464823371	0.940277776745887
PF3D7_0831700	90.1891324081571	0.214036895858786	0.308703412322673	0.693341528842783	0.488095247000739	0.940277776745887
PF3D7_1435700	13.0194198797555	0.410424569128011	0.59242334281391	0.692789327271548	0.488441770952769	0.940277776745887
PF3D7_0816600	10.7896393510127	0.419770637627187	0.604168586369127	0.69479057186651	0.487186557552432	0.940277776745887
PF3D7_0507100	75.2405175798931	0.222013342675151	0.319899930649834	0.694008723991157	0.487676737903833	0.940277776745887
PF3D7_0629900	8.20598196547856	-0.452207404758659	0.648856409534343	-0.696929857074525	0.485846691580181	0.940277776745887
PF3D7_1360700	21.2582402467776	-0.344753158478516	0.498306121393045	-0.691850137250448	0.489031446901459	0.940277776745887
PF3D7_0504900	11.3951458506978	0.408813941386605	0.590911390127901	0.691836285806098	0.489040146480558	0.940277776745887
PF3D7_0926100	27.1802196909063	0.347396917032426	0.502921824016017	0.690757291577313	0.489718078904706	0.940660826048628
PF3D7_0936100	10.5430939714236	0.430793787578928	0.624703808157521	0.689596864871843	0.490447739497265	0.941142390734498
PF3D7_0519700	29.0134989855003	0.312789965826772	0.455813695968902	0.68622327190474	0.49257232474378	0.94360535627494
PF3D7_1029600	105.868465402865	-0.20341110099761	0.297680348743888	-0.683320554601395	0.494404308635985	0.94360535627494
PF3D7_0628200	37.3703948665904	-0.270397809202618	0.39678492488344	-0.681471982036741	0.495572889402411	0.94360535627494
PF3D7_0935500	12.0581793413074	0.415270175596938	0.608859123953008	0.682046403280947	0.495209609418066	0.94360535627494
PF3D7_1205500	18.8504627939583	0.344138542168949	0.503246451855198	0.683836996565591	0.494078101818767	0.94360535627494
PF3D7_0416700	20.9576306715315	-0.331453835016534	0.486128810412647	-0.681823064004748	0.495350838489044	0.94360535627494
PF3D7_1429100	13.9837264024202	0.388509791730027	0.567199784383754	0.684961106168493	0.493368464425556	0.94360535627494
PF3D7_1450400	15.307612400634	0.407187323380153	0.594974528317068	0.684377740559607	0.493736668242932	0.94360535627494
PF3D7_0106400	9.77303493057699	-0.421790012534331	0.631889664324908	-0.667505794678503	0.504449109545781	0.94437704208753
PF3D7_1333000	9.20570052910274	0.432019711844232	0.639077376423272	0.676005328591225	0.499037261912109	0.94437704208753
PF3D7_1406800	24.0983326248327	-0.322807814652596	0.480527472938761	-0.671778062299748	0.501724996692187	0.94437704208753
PF3D7_0104200	43.4506336777309	0.250440567571475	0.372074133497297	0.673093195749645	0.500888002448995	0.94437704208753
PF3D7_0505700	13.9315977100892	0.387604113981132	0.574680579537059	0.674468788023725	0.500013322668757	0.94437704208753
PF3D7_1103700	13.9485265754766	0.397243375280754	0.584286474378409	0.679877752952197	0.496581869220948	0.94437704208753
PF3D7_1140300	7.82726560046095	-0.448264300306748	0.668402379782149	-0.670650365507152	0.502443289253309	0.94437704208753
PF3D7_1441200	25.6936596123402	0.311993861895969	0.466240258702375	0.669169716841485	0.503387221530891	0.94437704208753
PF3D7_0215700	11.7649207027647	-0.399521412203595	0.597606272977361	-0.668536175520918	0.503791398057578	0.94437704208753
PF3D7_0520000	74.1815338999429	-0.216658038220123	0.319935315509867	-0.677193256627031	0.498283345700791	0.94437704208753
PF3D7_1349500	36.3565943648223	0.277598096106483	0.416049220085855	0.6672241713353	0.50462895378723	0.94437704208753
PF3D7_1115400	42.2857034194104	0.25913620201078	0.382335335699928	0.677772044104657	0.497916238968853	0.94437704208753
PF3D7_0113000	25.2036901367064	-0.328411185390775	0.489358479974608	-0.671105536799558	0.502153300005763	0.94437704208753
PF3D7_1317300	8.2538411826853	0.434553861812943	0.648307373186243	0.670289865249005	0.502673026495218	0.94437704208753
PF3D7_1011900	10.8171131321524	0.40656859621012	0.608096571658113	0.668592153219215	0.503755679406445	0.94437704208753
PF3D7_1233900	12.1126081360798	-0.417393545913842	0.620069960005266	-0.673139440443619	0.500858584276632	0.94437704208753
PF3D7_0923400	11.0694725541379	-0.421157179734826	0.625068249167933	-0.673777911924745	0.500452519639025	0.94437704208753
PF3D7_0605100	20.9321195205613	0.382647231838123	0.570089997581763	0.671204956167019	0.502089971794651	0.94437704208753
PF3D7_1006800	50.7735325212948	0.248470110326	0.375561399936008	0.66159650690496	0.508229846798394	0.945711788786784
PF3D7_1421200	35.6682008781228	-0.277553964653658	0.419314184928574	-0.661923623454179	0.50802017111337	0.945711788786784
PF3D7_0305200	9.08314827043985	-0.427289071200257	0.645290741179725	-0.662165197689159	0.50786535561694	0.945711788786784
PF3D7_0908000	13.3193065818025	-0.378080943451864	0.569180953618544	-0.664254383510605	0.506527511616549	0.945711788786784
PF3D7_0110700	17.2075444693797	0.362092417823203	0.544747944034795	0.664697171945774	0.506244203035445	0.945711788786784
PF3D7_1326300	9.44299257094654	0.417751270273847	0.630022455342569	0.663073620204059	0.507283404773534	0.945711788786784
PF3D7_1233600	44.8245343291233	0.24822793458677	0.376641103011761	0.659056944666548	0.509859202273383	0.947846104510122
PF3D7_1338100	32.7242093575429	0.301472044540644	0.459826991141197	0.65562059285048	0.512068272311042	0.948094991385847
PF3D7_0218500	17.8878355987437	-0.339286000272737	0.525046462616051	-0.646201859131171	0.518148635686436	0.948094991385847
PF3D7_1011400	24.3496853153961	-0.313230030392037	0.482965926490914	-0.648555132383505	0.516625964294034	0.948094991385847
PF3D7_1407100	13.3341544874894	-0.392525216764503	0.605904923500406	-0.647833020561748	0.517092955701958	0.948094991385847
PF3D7_1415600	11.9661492230793	0.382829814621441	0.593039833542166	0.645538112229051	0.51857852833489	0.948094991385847
PF3D7_1224500	29.0810488832804	-0.306997153530573	0.473974013325677	-0.647708829807994	0.517173292179335	0.948094991385847
PF3D7_1140700	12.8041499424437	-0.38004615063517	0.589837091662091	-0.64432392605939	0.519365403735479	0.948094991385847
PF3D7_0913900	8.26001273209297	0.435951592176675	0.67705284903846	0.643895957008093	0.519642903675602	0.948094991385847
PF3D7_1032100	15.2735586953228	0.354214625853603	0.545093123144075	0.649824059071792	0.515805876223372	0.948094991385847
PF3D7_0808000	10.5182325578341	-0.423213020244599	0.65283236674928	-0.648272116702716	0.516808965151133	0.948094991385847
PF3D7_0630300	12.6115669144064	0.375527492085811	0.572113577880828	0.656386260708594	0.511575628285465	0.948094991385847
PF3D7_1006600	9.0696233876229	-0.408030589130271	0.624123813027004	-0.653765455849729	0.513262925154414	0.948094991385847
PF3D7_0612200	21.5434776315801	0.349280559224809	0.541659816145093	0.64483380308804	0.519034893621444	0.948094991385847
PF3D7_0907400	21.7360018240882	0.32165912932712	0.49588857297902	0.648652029617809	0.516563317261076	0.948094991385847
PF3D7_0316700	18.9579756815847	-0.342465436253143	0.521719092731025	-0.656417296251227	0.511555664696069	0.948094991385847
PF3D7_1025300	13.0915334925664	0.374463980853781	0.579172742892111	0.646549730541336	0.517923401495204	0.948094991385847
PF3D7_1112100	13.1169009075188	0.370060597195013	0.57367632811345	0.645068619812094	0.518882718354943	0.948094991385847
PF3D7_1311400	15.8333115540836	-0.346505310014809	0.533395632370602	-0.649621573530356	0.515936694251734	0.948094991385847
PF3D7_0924700	9.11960477513808	0.428250782289319	0.658292428194637	0.650547938799469	0.515338346477266	0.948094991385847
PF3D7_0910200	24.0635362281076	0.31463852990576	0.487094859345449	0.645949190119902	0.518312261505573	0.948094991385847
PF3D7_0410900	11.8483941828874	-0.377159947337058	0.614689625803277	-0.613577863534274	0.539494315229238	0.948931673065816
PF3D7_1002900	10.2997988234952	0.379906055077552	0.617530969815826	0.615201623314303	0.538421575883994	0.948931673065816
PF3D7_1232500	13.6486309752011	0.344237742601613	0.56293751043583	0.611502584603221	0.540866907803417	0.948931673065816
PF3D7_0724100	19.2787774696138	0.32113151685742	0.516150954467514	0.622165887862619	0.533832793952447	0.948931673065816
PF3D7_1027800	54.7855222275916	-0.221011345411816	0.359729734828991	-0.614381642698736	0.538963163553392	0.948931673065816
PF3D7_1128100	12.5860716451687	0.380426039561889	0.59789852076906	0.63627191964375	0.524599204004045	0.948931673065816
PF3D7_1015800	13.503665072259	-0.354391649368246	0.567887419155454	-0.624052650955514	0.532593008072363	0.948931673065816
PF3D7_0405100	13.2991861340721	-0.362139780611117	0.569380233984172	-0.636024503480014	0.524760451135251	0.948931673065816
PF3D7_0409100	10.7341166052353	0.4005204073571	0.641635451008219	0.62421801464952	0.532484417624764	0.948931673065816
PF3D7_0305500	49.9778196471879	0.237512685085185	0.376546236426086	0.630766323252862	0.528193326075647	0.948931673065816
PF3D7_0219600	11.3426264085245	-0.372134176489469	0.60794411657728	-0.612119052298065	0.540458993007527	0.948931673065816
PF3D7_0619000	12.7679845996416	0.372086732972228	0.596532804067579	0.623748988211679	0.532792445435733	0.948931673065816
PF3D7_0308500	11.4235340079642	-0.386878273476887	0.624652267970037	-0.619349825998621	0.535685926901232	0.948931673065816
PF3D7_1361700	11.1636269126219	0.368659418187117	0.598714776517655	0.615751327086622	0.538058655845228	0.948931673065816
PF3D7_1436100	10.8005320308637	0.396078911347977	0.630685487122704	0.628013359170443	0.529995188571601	0.948931673065816
PF3D7_0822600	16.4437765327354	-0.333156919131561	0.522323894533279	-0.637835876586217	0.523580522789731	0.948931673065816
PF3D7_1144300	41.7634478163939	-0.249058247594134	0.402053323484942	-0.619465710257863	0.535609604416509	0.948931673065816
PF3D7_0804400	9.19876353823408	0.407375252963723	0.643401810798666	0.633158387381659	0.526630216835517	0.948931673065816
PF3D7_1457300	13.5627981396258	0.349122524192979	0.566381278688073	0.616409011614335	0.537624607195558	0.948931673065816
PF3D7_0926200	12.0110852388032	-0.375966281868315	0.588520404578443	-0.638833044603814	0.522931548915842	0.948931673065816
PF3D7_1311200	8.21990529393529	-0.425483508194816	0.66800807193798	-0.636943662911784	0.524161540603895	0.948931673065816
PF3D7_0710100	9.84660932683487	0.38722843518875	0.617178686894444	0.627417056699136	0.530385889933468	0.948931673065816
PF3D7_1143800	8.89390004283777	-0.40149610728597	0.631465461786191	-0.635816416863529	0.524896085890373	0.948931673065816
PF3D7_1467400	9.27281058442364	-0.423643913398625	0.687845765164798	-0.615899573499774	0.537960803075708	0.948931673065816
PF3D7_0914200	11.7571200173103	0.368002553532564	0.59621699955441	0.617229219910863	0.537083545102229	0.948931673065816
PF3D7_0825000	17.4962940737806	0.34171590534882	0.541399343795492	0.631171628235109	0.527928310779572	0.948931673065816
PF3D7_1123900	19.6379222334607	-0.312102246530588	0.495593618031807	-0.629754369658887	0.528855304234364	0.948931673065816
PF3D7_1426800	8.72783038800594	0.393662581812438	0.635412215235504	0.619538895182451	0.535561406945683	0.948931673065816
PF3D7_0705700	52.8559722285123	-0.246076923063438	0.388484082847468	-0.633428585438482	0.526453802826001	0.948931673065816
PF3D7_0314200	9.19946023787399	0.393607058043091	0.624147768783098	0.630631202624511	0.528281691971785	0.948931673065816
PF3D7_1211600	15.9995518855651	-0.331710128902912	0.540374838911796	-0.613851913554872	0.539313188615551	0.948931673065816
PF3D7_1037700	9.0318773748652	-0.398803852046259	0.630368836833088	-0.63265159814976	0.526961184101769	0.948931673065816
PF3D7_1132000	11.5862017501729	-0.381003109156765	0.621551550394578	-0.612987143085548	0.539884840942975	0.948931673065816
PF3D7_0912800	7.8038688382339	0.402525843115751	0.653618959741326	0.615841748646725	0.537998970369999	0.948931673065816
PF3D7_1021300	8.64367013736734	0.413335363710194	0.658024929168703	0.628145447669239	0.529908663092922	0.948931673065816
PF3D7_1351800	9.47409794026754	-0.389008130948123	0.616558976280959	-0.630934178096949	0.528083563216811	0.948931673065816
PF3D7_1342000	55.3555782898969	0.215665650716017	0.352669630200256	0.611523171398555	0.540853283100794	0.948931673065816
PF3D7_1442400	16.8313583226759	0.331149764182568	0.537762021410003	0.615792397005463	0.538031545995888	0.948931673065816
PF3D7_1352400	15.123161391503	0.35466084450008	0.57827053741232	0.613313011046936	0.539669391902817	0.948931673065816
PF3D7_0725100	18.1741417690551	0.347366187788217	0.549851841189118	0.631745066156363	0.527553474815065	0.948931673065816
PF3D7_0519100	17.5872260234976	-0.322529871306873	0.524966717767086	-0.614381560565847	0.538963217814884	0.948931673065816
PF3D7_0829000	18.2841450530301	0.334984908054439	0.541831868136547	0.618245119480533	0.536413772141849	0.948931673065816
PF3D7_0916500	8.23644529321623	0.402610082691674	0.652969171047974	0.616583600793144	0.537509414024991	0.948931673065816
PF3D7_0419600	47.6295380090616	0.227367947109578	0.37332156298981	0.609040488550038	0.542497602072287	0.95094361112582
PF3D7_1467900	39.1794000984992	-0.246152913603107	0.406362533792621	-0.605747068524595	0.544682723296733	0.953922951228235
PF3D7_1441000	13.127971682882	-0.358584705995662	0.596731210632555	-0.600914950661874	0.547896634784958	0.953963193891149
PF3D7_1348400	14.6626697011653	0.335101346368092	0.558610465382703	0.599883760033952	0.548583706234553	0.953963193891149
PF3D7_0210100	26.9725882024369	-0.273545503845765	0.455175645207094	-0.600966916235837	0.547862021931347	0.953963193891149
PF3D7_0505800	48.7996453213406	0.231475797977237	0.38463469336917	0.601806862375432	0.547302706661298	0.953963193891149
PF3D7_0919000	51.5172458651863	0.217759423403047	0.363007977572329	0.599875035417532	0.548589521168956	0.953963193891149
PF3D7_0511000	35.3610097490718	-0.246896165885998	0.410837191356621	-0.600958654864533	0.547867524533526	0.953963193891149
PF3D7_1202900	93.7243041279377	-0.1867432442202	0.311156117987933	-0.600159320111591	0.548400061813523	0.953963193891149
PF3D7_0609000	40.0432655703518	0.239322663058395	0.397937937791339	0.601407004284887	0.547568934612847	0.953963193891149
PF3D7_0407700	10.743317028113	-0.380098487676982	0.635299758776553	-0.598297862427916	0.549641202647704	0.954946917066966
PF3D7_1320000	15.4781062119515	0.328320077440469	0.55187603534655	0.594916351521407	0.551899386632744	0.957401703727916
PF3D7_0201500	9.26214965007831	0.370056717954584	0.627506740180009	0.589725487009794	0.555374705164784	0.957401703727916
PF3D7_1012300	8.31065359990141	-0.39528430523003	0.665260630776465	-0.594179614640161	0.552391985800333	0.957401703727916
PF3D7_0804600	8.05232450087389	-0.38473005201627	0.652494721526964	-0.589629370665141	0.555439156361234	0.957401703727916
PF3D7_1327400	8.18840147897451	0.39830193567967	0.672654687781582	0.592134334175641	0.553760637182997	0.957401703727916
PF3D7_1022500	8.31665654260677	-0.379646908378479	0.639740317354162	-0.593439084703342	0.552887338444518	0.957401703727916
PF3D7_1017900	13.6737843781694	-0.348007547962357	0.58967234272634	-0.590171053899782	0.555075976244041	0.957401703727916
PF3D7_0813700	9.21209217453538	-0.372262304146604	0.63074495895425	-0.590194656115524	0.555060154402821	0.957401703727916
PF3D7_0805500	18.5266653981225	-0.312536952108097	0.528663184030305	-0.591183501233142	0.554397476177312	0.957401703727916
PF3D7_0722000	9.21452985134234	0.384991843108062	0.654236803630836	0.588459470594533	0.556223930189793	0.957914130432028
PF3D7_0415900	58.1986244386251	0.170776210529075	0.367467437670341	0.464738349639241	0.642118841736275	0.957993953515366
PF3D7_1470100	9.77988781086202	0.3336485641362	0.63606202896698	0.524553500981774	0.599893618482142	0.957993953515366
PF3D7_0519600	7.87525076538484	-0.362779539632111	0.653825164597341	-0.55485710748917	0.578992402163087	0.957993953515366
PF3D7_0527500	47.1228355600097	0.191494455607613	0.407076424345816	0.470414016029914	0.638059252328739	0.957993953515366
PF3D7_1006900	9.76779625789023	-0.298603388232947	0.639609876326058	-0.466852372493269	0.640605502626306	0.957993953515366
PF3D7_1216500	8.6510057600873	-0.347180998498974	0.679967724384931	-0.510584526365598	0.609642013174054	0.957993953515366
PF3D7_0617300	9.06142218658135	-0.34707893674985	0.644694370937655	-0.53836197800991	0.590327170611936	0.957993953515366
PF3D7_1309300	12.6126778866395	-0.302633633216156	0.578736238812348	-0.522921519200534	0.601028868799003	0.957993953515366
PF3D7_0805000	13.2830034784233	-0.333950457976263	0.59238160805204	-0.563742110553381	0.57292965413573	0.957993953515366
PF3D7_0415700	9.80076377092934	0.311652376445138	0.649698889765793	0.479687408050649	0.631449682917342	0.957993953515366
PF3D7_1203900	30.2583001839194	0.218207455175654	0.437171898086651	0.499134221871699	0.617684830263238	0.957993953515366
PF3D7_0804900	17.3030212519958	0.298232215634263	0.534012022592293	0.558474721573744	0.576520261311636	0.957993953515366
PF3D7_0610900	11.3237366333242	-0.323587737667339	0.610033384450615	-0.530442670705237	0.595805047511593	0.957993953515366
PF3D7_1338600	17.6882994987817	-0.30110065591334	0.52155810755244	-0.577309894244269	0.563730130992674	0.957993953515366
PF3D7_1454400	31.1069384782576	0.237176913384771	0.465065430901206	0.509986117276377	0.610061187840145	0.957993953515366
PF3D7_0316900	9.54551501681774	-0.310296672080569	0.617781788153381	-0.502275525162503	0.615473722967898	0.957993953515366
PF3D7_1433800	9.74922995696534	0.322704927702123	0.646863977873707	0.498876021451804	0.617866727463577	0.957993953515366
PF3D7_1016400	18.6388007586978	0.245059866487761	0.519002919000707	0.472174351079955	0.636802345753228	0.957993953515366
PF3D7_0404900	14.0003564101141	-0.300547683149979	0.557349946396725	-0.539244123181538	0.589718418650281	0.957993953515366
PF3D7_1123000	33.2362008291086	0.21064502569424	0.411621724784775	0.511744188925841	0.608830055306848	0.957993953515366
PF3D7_0831500	10.0502734768413	0.375823443249364	0.646096401981809	0.58168323193966	0.560780068137375	0.957993953515366
PF3D7_0808100	13.7347092904558	0.313712041556816	0.573039604172297	0.547452635511893	0.584067802214167	0.957993953515366
PF3D7_1354400	14.5992415888083	0.278392594772091	0.574843502789749	0.484292843914971	0.628178053859771	0.957993953515366
PF3D7_0808300	8.69796210201445	-0.318099730073926	0.641974510227273	-0.49550211886343	0.620245726715824	0.957993953515366
PF3D7_1353800	21.6644305563141	-0.285341607480326	0.501272064459339	-0.569235007715997	0.56919666614652	0.957993953515366
PF3D7_1252300	63.9720847505626	-0.17622876525613	0.354803884214475	-0.496693449809028	0.619405242225505	0.957993953515366
PF3D7_0606000	11.4655087205968	-0.281406570192588	0.588778664015859	-0.47794967343621	0.632686025229325	0.957993953515366
PF3D7_0703900	15.5993413455739	0.305284797926686	0.541906993441215	0.563352755401935	0.573194701276869	0.957993953515366
PF3D7_1315900	16.8799180674046	-0.267407861226288	0.523701358133791	-0.510611357165839	0.609623221685917	0.957993953515366
PF3D7_1003800	10.378372473969	0.298913215025682	0.621492178200911	0.480960542240406	0.630544542544238	0.957993953515366
PF3D7_0112200	24.0501128398052	0.227763398018594	0.48047122645422	0.474041702141962	0.635470169594861	0.957993953515366
PF3D7_1116500	21.8896761237094	-0.247586855472728	0.495359061509325	-0.499812912916841	0.61720681736295	0.957993953515366
PF3D7_1441100	64.8373108739571	0.176052483320933	0.333246026111002	0.528295822085186	0.59729403093117	0.957993953515366
PF3D7_1369400	15.04881548762	0.257290039747618	0.560106186296474	0.459359396561691	0.645976100932967	0.957993953515366
PF3D7_0526200	8.76232409915549	-0.327036721723979	0.631869893754479	-0.517569716418636	0.60475851545268	0.957993953515366
PF3D7_0415200	12.0023835846374	0.319334116624888	0.61105378664131	0.522595757699376	0.601255593354589	0.957993953515366
PF3D7_1434500	30.464966847625	-0.199912598348751	0.434027723606778	-0.460598684082837	0.645086555883301	0.957993953515366
PF3D7_0108700	24.7850558375334	0.222437191218146	0.462271407215004	0.481183105306553	0.630386367214329	0.957993953515366
PF3D7_0517300	45.8044771858844	0.169688502608239	0.368570796387536	0.460395951799228	0.645232039876007	0.957993953515366
PF3D7_1406600	9.97904306727345	0.319523899376049	0.611001228639022	0.522951320552619	0.601008129484254	0.957993953515366
PF3D7_0828500	9.14199205964649	0.339741327572872	0.625765714848728	0.542920967881727	0.587184218526075	0.957993953515366
PF3D7_0209800	47.6593849026599	-0.189225624638416	0.360257119911523	-0.525251588878768	0.599408306321751	0.957993953515366
PF3D7_1012900	24.1948979735943	0.222168413642961	0.471510456904837	0.471184488889926	0.637508994421638	0.957993953515366
PF3D7_0416900	10.2107309616424	-0.355989047769298	0.62877228276355	-0.566165299470059	0.571281416622408	0.957993953515366
PF3D7_1353100	8.39527336503576	-0.361426634687351	0.725555521989522	-0.49813780439062	0.618386916335766	0.957993953515366
PF3D7_1013000	7.82448187991187	0.385184112030184	0.668612846044513	0.576094393502784	0.564551380794651	0.957993953515366
PF3D7_0919600	11.1392521951506	0.289806008885677	0.632405777545084	0.458259584551339	0.646765956480686	0.957993953515366
PF3D7_0303400	8.16298914887807	-0.347940440474912	0.656108690938165	-0.530309147372205	0.595897605521883	0.957993953515366
PF3D7_1021800	30.0010553705957	-0.248590063785631	0.449338214953528	-0.553235971285773	0.580101838465968	0.957993953515366
PF3D7_0604700	7.91707189048697	-0.303050268588948	0.656234413575065	-0.461801853605904	0.644223421514296	0.957993953515366
PF3D7_1021900	50.7751473015976	0.213119599583311	0.367452716772922	0.57999190060422	0.561920079717586	0.957993953515366
PF3D7_0306700	9.3978935743703	-0.297575414366144	0.633737623126133	-0.469556175153763	0.638672141579298	0.957993953515366
PF3D7_0937800	10.4055053421234	-0.281675867478491	0.60854146634234	-0.462870458395405	0.643457223691332	0.957993953515366
PF3D7_0826500	13.6825217854278	0.323664847467205	0.56783821022595	0.56999483592063	0.568681200627543	0.957993953515366
PF3D7_0731100	7.93810127470557	-0.349703914416658	0.667180080565382	-0.524152211079671	0.6001726765246	0.957993953515366
PF3D7_1016300	447.877276944899	0.105752681971834	0.23130321347532	0.457203686809642	0.647524648641233	0.957993953515366
PF3D7_1220300	15.8778850406396	0.250776765579916	0.529872545376813	0.473277522619292	0.636015196223394	0.957993953515366
PF3D7_0410700	9.47770602853032	-0.339829255683516	0.618810715077018	-0.549165112050815	0.582892144388549	0.957993953515366
PF3D7_0611800	15.8325892845777	-0.309902137761599	0.575136901800477	-0.538831949039341	0.590002816340251	0.957993953515366
PF3D7_1244000	10.7283001661331	0.329301947751404	0.604378826924045	0.544860165647049	0.585849694855345	0.957993953515366
PF3D7_1410600	36.1958222182065	0.206093173240531	0.404002233811934	0.510128796308758	0.609961232156837	0.957993953515366
PF3D7_1208900	42.7278393481472	-0.206646446155278	0.421936585794311	-0.489757117805411	0.624305778510822	0.957993953515366
PF3D7_0912900	19.7561444839457	-0.234811254745113	0.497321889041062	-0.472151457475312	0.636818685446891	0.957993953515366
PF3D7_0722400	16.1600702530107	-0.281676979325911	0.530104865875941	-0.531360863591529	0.595168736304315	0.957993953515366
PF3D7_1134200	10.7110733963363	-0.279278720225365	0.606339516403294	-0.460597920257616	0.645087103991245	0.957993953515366
PF3D7_1305000	10.0189542589155	0.316840840855545	0.62003499378573	0.511004772361345	0.609347715044694	0.957993953515366
PF3D7_0606800	10.6419825957868	-0.325401420675283	0.619033456447105	-0.525660474868192	0.599124130543468	0.957993953515366
PF3D7_0815800	19.974404154067	0.301749681455427	0.534400863308251	0.56465043785188	0.572311551401313	0.957993953515366
PF3D7_0527400	26.437819518372	-0.239036124562933	0.477715640234222	-0.500373243894076	0.616812289512775	0.957993953515366
PF3D7_1471200	21.2054866198593	0.289233672700448	0.507552953481507	0.569859106752269	0.568773262581376	0.957993953515366
PF3D7_1217900	7.88735795909855	0.337294998641347	0.666153246680919	0.506332439753023	0.612623293668634	0.957993953515366
PF3D7_1313000	17.9015903204982	-0.298727044010582	0.512342588225832	-0.583061121358328	0.559852155006288	0.957993953515366
PF3D7_0702900	9.11540164512911	0.301940188055474	0.637081130444992	0.473943071967261	0.63554050332607	0.957993953515366
PF3D7_0517400	16.3994686382095	0.286817473258859	0.548202842053362	0.523195888924158	0.60083794202082	0.957993953515366
PF3D7_1409400	13.1649779874239	-0.312622143252301	0.573570879100629	-0.54504535471274	0.585722324481608	0.957993953515366
PF3D7_0905200	8.61982974237705	-0.334126226780555	0.696250907648465	-0.479893416453907	0.631303182806271	0.957993953515366
PF3D7_0724600	11.0492934570897	-0.323974727909299	0.625220168891875	-0.518177026316193	0.604334762162909	0.957993953515366
PF3D7_1236300	9.437083776549	0.301303844024698	0.645158435519337	0.467023024789493	0.640483404947515	0.957993953515366
PF3D7_1431500	8.31127421151356	-0.302520127755431	0.646542362392036	-0.467904572619474	0.639852833365798	0.957993953515366
PF3D7_1334100	8.91175493383262	0.326996102730843	0.632145646525135	0.517279687882563	0.604960931213082	0.957993953515366
PF3D7_0616200	12.4753638252094	0.303061015830252	0.576646468267862	0.525557742060903	0.599195524105189	0.957993953515366
PF3D7_1138400	12.7798111642766	0.294673247158644	0.620596016178041	0.474822975779634	0.634913155211595	0.957993953515366
PF3D7_0803100	9.45411301978761	-0.347090403374018	0.617508315099912	-0.562082153206081	0.574060047229084	0.957993953515366
PF3D7_1022200	13.5559706658275	-0.314435261062333	0.555718032227827	-0.565817991908214	0.571517514417504	0.957993953515366
PF3D7_0317700	21.6403966970491	0.24444017246824	0.493431379880673	0.495388381110567	0.620325994715668	0.957993953515366
PF3D7_1132800	33.4462057567952	0.206975999928498	0.426504136471953	0.485284859463746	0.627474293935065	0.957993953515366
PF3D7_1244600	15.348353417505	-0.313478574164725	0.555653702933031	-0.564161765700509	0.572644045906513	0.957993953515366
PF3D7_0704100	22.6033092167405	-0.252843715475859	0.513626489886917	-0.492271563975462	0.622527379594096	0.957993953515366
PF3D7_1419200	16.522258268228	0.247746659367206	0.543534675277533	0.455806539372496	0.648529101261758	0.957993953515366
PF3D7_0320000	21.1730123820725	-0.250738373654869	0.525446810988518	-0.477190780134638	0.633226275857401	0.957993953515366
PF3D7_1321900	13.2261656547204	0.333700915918615	0.584633556563482	0.57078645618656	0.568144404860647	0.957993953515366
PF3D7_1234800	12.394224480264	-0.317542505996324	0.574966162279952	-0.552280337223936	0.580756300052068	0.957993953515366
PF3D7_1208400	7.77397498237645	-0.358040736743033	0.658420278688468	-0.543787529533915	0.586587691252625	0.957993953515366
PF3D7_1440000	7.80149955365727	0.386588600352807	0.689112158635021	0.560995181275794	0.574800822158316	0.957993953515366
PF3D7_0719900	14.1093679818389	0.288481601490642	0.56828502487171	0.507635409811769	0.6117090530068	0.957993953515366
PF3D7_1116800	28.898323024363	0.264271384406933	0.4721841282012	0.559678669026177	0.575698634566176	0.957993953515366
PF3D7_1446300	11.1522750678659	-0.274139511934777	0.595266566082533	-0.46053235231889	0.645134155143811	0.957993953515366
PF3D7_0807400	18.1369470223951	-0.258290471934578	0.518979355327832	-0.497689299743762	0.618703051143927	0.957993953515366
PF3D7_0207700	25.2818894451523	-0.281855470690963	0.481438277192641	-0.585444664546651	0.558248763808035	0.957993953515366
PF3D7_1117300	28.4673926539996	-0.206253148387304	0.446710643124786	-0.461715321901762	0.644285481971063	0.957993953515366
PF3D7_0321100	11.6152953419286	-0.281568002764943	0.589543192898206	-0.477603687323994	0.632932305943897	0.957993953515366
PF3D7_0728100	13.7340555993918	0.321842957197089	0.56240043326782	0.572266552724763	0.567141405744862	0.957993953515366
PF3D7_1316600	21.3461623365888	-0.23894666692298	0.483911392062221	-0.493781859329024	0.62146024603577	0.957993953515366
PF3D7_0716800	18.1707889262165	0.291853708820134	0.512886723742995	0.569041262542761	0.569328138066621	0.957993953515366
PF3D7_1221000	17.7802458331847	0.292742260828641	0.547811598119721	0.534384926922749	0.593075245290126	0.957993953515366
PF3D7_0823100	9.65178235824469	-0.347543840448825	0.64028889568155	-0.542792234556692	0.587272860458093	0.957993953515366
PF3D7_0933600	19.7334249127012	-0.271499863697095	0.496952197001988	-0.546329939448901	0.584839159630465	0.957993953515366
PF3D7_0827000	8.86659728793856	-0.310014296555514	0.661079660039414	-0.468951497520028	0.639104305314557	0.957993953515366
PF3D7_1405900	9.34489128116189	-0.325818110811134	0.636859960409036	-0.511600871566601	0.608930375371794	0.957993953515366
PF3D7_1451800	24.5900012633324	0.238031398154585	0.467032568585348	0.509667663811085	0.610284310859035	0.957993953515366
PF3D7_1358200	10.8612859397419	0.35159981951822	0.659159780087824	0.53340605743781	0.593752525264881	0.957993953515366
PF3D7_1230700	10.0612248060101	0.281328511479731	0.611108808130008	0.460357480921599	0.645259648738243	0.957993953515366
PF3D7_1238500	9.07518452652184	0.324251936494847	0.696755774389368	0.46537387763886	0.641663737634175	0.957993953515366
PF3D7_0719700	27.0465788326352	-0.206407176199007	0.453353360476994	-0.4552898339208	0.648900738996922	0.957993953515366
PF3D7_0610100	13.3787102633561	-0.298819297620406	0.570107620785318	-0.524145418734773	0.60017740044423	0.957993953515366
PF3D7_0828300	9.99870451347804	-0.313481584546246	0.610435242284194	-0.513537821593043	0.607575161271827	0.957993953515366
PF3D7_0805700	29.0618483999488	0.232747131050378	0.452150871861463	0.514755462246882	0.60672391149758	0.957993953515366
PF3D7_0417300	12.2618258892247	0.333698436795782	0.586233230696789	0.569224703279193	0.569203658183263	0.957993953515366
PF3D7_0108300	47.0831678058875	-0.193199569277782	0.391457963275541	-0.493538482807136	0.621632155536566	0.957993953515366
PF3D7_0907800	14.437434062894	0.323949989438283	0.565040879808909	0.573321331277553	0.566427144855032	0.957993953515366
PF3D7_1338900	11.4910802412415	-0.273687190972152	0.590995855659063	-0.463094941109094	0.643296315999061	0.957993953515366
PF3D7_0824500	9.34490692190381	-0.364466888047009	0.64263605244639	-0.567143543627151	0.570616661130428	0.957993953515366
PF3D7_1366400	16.2638175821828	0.30374961374013	0.53413091874992	0.568680080252657	0.569573268439097	0.957993953515366
PF3D7_0310300	8.41839934969682	-0.368009352331428	0.652957582244904	-0.563603765908027	0.57302382332573	0.957993953515366
PF3D7_1442300	9.15875982791752	0.314651435289931	0.652650044787186	0.482113558105295	0.62972527891859	0.957993953515366
PF3D7_1231900	8.63892378664881	-0.290446099324866	0.636188480858394	-0.456540959265678	0.648001024153517	0.957993953515366
PF3D7_0717100	10.598268789723	0.342150860124729	0.619549330976411	0.552257654100761	0.580771838683926	0.957993953515366
PF3D7_1218500	13.8701639365876	-0.317542985562392	0.584171049929187	-0.543578778169313	0.586731366691771	0.957993953515366
PF3D7_1410300	23.7380056366701	-0.247622822297387	0.461156290705726	-0.536960738231369	0.59129473444593	0.957993953515366
PF3D7_0610600	15.1043382333974	0.256844373540506	0.542636712659749	0.473326569228196	0.635980209373202	0.957993953515366
PF3D7_1014300	20.8405067529369	0.275892759709032	0.503803600626394	0.547619666405731	0.583953082771735	0.957993953515366
PF3D7_1434200	14.9193594809195	-0.293956114387862	0.543527196130051	-0.540830553615069	0.588624381248295	0.957993953515366
PF3D7_1366600	9.70043865294253	-0.288390559344179	0.632831732493457	-0.455714441195726	0.648595335994007	0.957993953515366
PF3D7_0305000	8.72487599080717	0.336177989582378	0.637225551971545	0.527565143209118	0.597801191371184	0.957993953515366
PF3D7_0102300	19.3901546213791	0.318898850892803	0.552632347165353	0.577054261352141	0.563902800856579	0.957993953515366
PF3D7_1024300	9.05993626862699	-0.360552098403621	0.624654668842563	-0.577202278935489	0.563802817753773	0.957993953515366
PF3D7_0811900	10.2330773075223	0.330831495935218	0.618139025988863	0.535205644726885	0.592507663446563	0.957993953515366
PF3D7_1327800	19.3385455640713	0.246420810666438	0.51807438780467	0.47564754496095	0.634325497065553	0.957993953515366
PF3D7_0323100	12.6690937419517	0.33621741382359	0.582962048840303	0.576739797200236	0.564115243839915	0.957993953515366
PF3D7_1030300	8.06505981578565	0.361335140431607	0.657210662107129	0.549801093112375	0.582455808828246	0.957993953515366
PF3D7_1358900	11.9277142064791	-0.305520583569074	0.587741109087149	-0.51982170184351	0.603187851999506	0.957993953515366
PF3D7_1315500	11.8174480041147	-0.287771771048241	0.587802516193649	-0.489572200050665	0.624436652384683	0.957993953515366
PF3D7_0220300	23.9473081302665	0.239101939597407	0.466427429806551	0.512624096092663	0.608214294409024	0.957993953515366
PF3D7_0814100	11.9269345676979	0.29208924418044	0.580075331547455	0.503536744790094	0.614586952834836	0.957993953515366
PF3D7_0916400	14.7811289734152	0.309631816750805	0.553197850303568	0.559712617431348	0.575675474698994	0.957993953515366
PF3D7_1229100	20.2446442002926	0.229903596951839	0.495833332560467	0.463671120625604	0.642883390993204	0.957993953515366
PF3D7_1437300	9.09337749348201	-0.362956865893643	0.654347838321082	-0.554684900961716	0.579110205631078	0.957993953515366
PF3D7_0606600	15.5392409643804	0.268988114786002	0.54254164259527	0.495792569026197	0.62004076821887	0.957993953515366
PF3D7_0628700	9.70628033515227	-0.370170425762843	0.683969890129071	-0.541208657142772	0.588363771107453	0.957993953515366
PF3D7_0108000	18.4497468938755	-0.233181166034599	0.511597130093906	-0.455790606158791	0.64854055983633	0.957993953515366
PF3D7_0619500	10.7057497145609	-0.30077654151694	0.603783027015783	-0.498153356518711	0.618375955466164	0.957993953515366
PF3D7_1143400	19.3262948205512	0.236345728342568	0.500475399792599	0.472242448760742	0.636753743911914	0.957993953515366
PF3D7_1216900	40.9159558977907	0.187886424633998	0.398042594418906	0.472025927045043	0.63690828254942	0.957993953515366
PF3D7_0914900	9.35312763160269	0.334717369606561	0.666446276235261	0.502242088435651	0.615497240156767	0.957993953515366
PF3D7_1248700	54.8840579799315	-0.171013757290417	0.357429625040163	-0.47845434544269	0.632326861345799	0.957993953515366
PF3D7_1408600	63.0455713033585	-0.18031449310995	0.336052552955237	-0.536566354054653	0.591567190298631	0.957993953515366
PF3D7_0813300	29.9133739792979	0.200038796857933	0.431071918555272	0.464049705507049	0.642612134265688	0.957993953515366
PF3D7_0402000	37.5111773115601	0.230435239559206	0.424710276034091	0.542570435806242	0.587425598998195	0.957993953515366
PF3D7_1432300	9.31655970326593	-0.302045453623315	0.62527287846865	-0.483061818326507	0.629051843474585	0.957993953515366
PF3D7_1439700	11.587271597566	0.293245875582777	0.590075321582112	0.496963463573641	0.619214816481157	0.957993953515366
PF3D7_1357800	17.4257934433045	0.248626740840588	0.518584618863672	0.479433310971276	0.6316304005861	0.957993953515366
PF3D7_0629200	30.4448158854834	0.256891572656594	0.465935201494704	0.551346135326317	0.581396417887676	0.957993953515366
PF3D7_1426100	23.1310562276066	-0.262162367912505	0.483409519829409	-0.542319414820419	0.587598483187006	0.957993953515366
PF3D7_1239800	66.4693956311489	0.170472206650469	0.356352817529301	0.478380409147325	0.632379474749091	0.957993953515366
PF3D7_0608300	8.63613048656644	-0.321551294992474	0.631640617700454	-0.509073175444466	0.610700933415629	0.957993953515366
PF3D7_1328500	8.4941462710457	0.355712856722468	0.652940656054358	0.544785890454422	0.585900783875074	0.957993953515366
PF3D7_0218600	18.2558047402848	-0.278737494752364	0.559773843969387	-0.497946622114069	0.618521665219204	0.957993953515366
PF3D7_1008500	21.4681203434103	0.253990920221162	0.478983763113223	0.530270417874525	0.595924453930348	0.957993953515366
PF3D7_1227200	22.5512235329855	-0.269329349389802	0.472941917772886	-0.569476587438243	0.569032754889599	0.957993953515366
PF3D7_0516600	11.1565032547709	0.35747131362554	0.640484018074688	0.558126828363506	0.576757781905749	0.957993953515366
PF3D7_0208800	7.74085723179677	0.361310555703674	0.667549584091312	0.541249016274201	0.588335956481518	0.957993953515366
PF3D7_0418500	10.7967276960853	-0.302742832694113	0.610808883243948	-0.495642484906693	0.620146672602624	0.957993953515366
PF3D7_0930600	14.8781409071494	-0.301472805790191	0.563535714908797	-0.53496663621219	0.592672928279357	0.957993953515366
PF3D7_0801700	9.02579834413207	-0.300440310157841	0.635363859450654	-0.472863392667009	0.636310643568504	0.957993953515366
PF3D7_0905700	8.10283139840931	0.324906016715316	0.646641810787051	0.50245129729527	0.615350102935795	0.957993953515366
PF3D7_1367700	7.83354087770973	0.317240227009488	0.648604789687301	0.489111755037198	0.624762579667473	0.957993953515366
PF3D7_1447000	70.2580153162283	-0.152268157562836	0.323867915014581	-0.470155117267424	0.638244197972655	0.957993953515366
PF3D7_1216200	10.8298132976649	0.34304046554397	0.602035845953897	0.569800731716297	0.568812859207314	0.957993953515366
PF3D7_1205900	10.0247606055144	0.298396844779078	0.61750603267141	0.483229035817149	0.628933120931637	0.957993953515366
PF3D7_0812400	44.4094552581245	0.198748586751228	0.372412736363405	0.533678275055789	0.59356414231922	0.957993953515366
PF3D7_1446900	16.9155772226324	0.24806587172082	0.536555324914413	0.462330462865856	0.643844357311671	0.957993953515366
PF3D7_1470700	10.469052551084	-0.306866479297816	0.610763867913786	-0.502430637139675	0.615364632597277	0.957993953515366
PF3D7_0703500	50.3680560233497	0.181544774310538	0.376342126149571	0.482392912448994	0.62952685503304	0.957993953515366
PF3D7_1330400	38.8554608910906	-0.229052597485481	0.453406275674602	-0.505181797814079	0.613431153645944	0.957993953515366
PF3D7_0629800	8.89866383226623	0.320456322355069	0.635034308466336	0.504628361149493	0.613819886122727	0.957993953515366
PF3D7_0202600	8.25380603328605	-0.374357458057103	0.644573155614588	-0.580783507343182	0.561386371962858	0.957993953515366
PF3D7_0612100	8.61242717084851	0.341578309856994	0.674314465370144	0.506556402685941	0.612466105088795	0.957993953515366
PF3D7_0628600	8.35023457475476	0.304171983950694	0.647120331370636	0.47003929440208	0.638326943913232	0.957993953515366
PF3D7_1019300	9.2001569375139	0.356117872156705	0.648570091824677	0.549081551316695	0.582949485288347	0.957993953515366
PF3D7_1003000	10.903988361519	-0.342258697960188	0.606351238399097	-0.564456170426611	0.57244372075996	0.957993953515366
PF3D7_0724000	10.1802441339862	-0.294513053183151	0.650063047360972	-0.453053060589693	0.650510534220106	0.958187324973605
PF3D7_1004400	16.6230158874229	0.262127346099809	0.578910423653273	0.452794310466251	0.650696860910745	0.958187324973605
PF3D7_1474600	22.1228599509246	0.216847337709969	0.479105805282904	0.452608453746296	0.650830710329785	0.958187324973605
PF3D7_1333800	11.1881363674387	0.279559477297329	0.617950182354002	0.452398082046651	0.650982228417182	0.958187324973605
PF3D7_0806700	13.7355669238329	0.24731615218421	0.565809240419179	0.437101649313797	0.662037631238527	0.959535588214052
PF3D7_1113300	24.4730608251094	0.205376138523737	0.460717178528238	0.445774866003068	0.6557598790047	0.959535588214052
PF3D7_1138500	26.4153500846272	0.201479162275794	0.482150739771548	0.417875875024599	0.676037872038817	0.959535588214052
PF3D7_1332000	10.219254520296	-0.252629164620861	0.60319482540693	-0.418818520948735	0.675348768067231	0.959535588214052
PF3D7_1308200	25.731269771089	0.204865298705623	0.483790849110714	0.423458399600154	0.671960844145737	0.959535588214052
PF3D7_0529800	14.3387140680654	0.261410930736769	0.611305882045381	0.42762704959113	0.668922669196779	0.959535588214052
PF3D7_1407900	20.0154750381359	-0.221717170964145	0.505281875707133	-0.438798978597552	0.660807200480602	0.959535588214052
PF3D7_0618000	8.49044454744507	-0.268165457124513	0.64437555764216	-0.416163297853443	0.677290514428952	0.959535588214052
PF3D7_0513600	27.3873810185069	0.191160956221615	0.447077481717588	0.427579030568058	0.668957635460876	0.959535588214052
PF3D7_1405800	8.95770214763188	0.267825611185733	0.628851310103038	0.42589656232385	0.67018321997627	0.959535588214052
PF3D7_1029400	13.1422330096927	-0.25426441864177	0.593881342195157	-0.428140102367815	0.66854912169392	0.959535588214052
PF3D7_1138000	17.4763911391578	-0.232316935361868	0.535943341844219	-0.433472938692454	0.664671221603382	0.959535588214052
PF3D7_1359700	10.4718028425905	-0.253627469676759	0.605121832540858	-0.419134554461203	0.675117798436213	0.959535588214052
PF3D7_1105800	21.7784154030636	0.231531915840735	0.5542361232809	0.417749594649552	0.676130207617932	0.959535588214052
PF3D7_1230800	8.22902501099836	0.291582386341034	0.657573992346529	0.44342140920223	0.657460953209389	0.959535588214052
PF3D7_1129000	40.3439542168238	-0.183405273660739	0.42972781184961	-0.426794051032759	0.669529339877582	0.959535588214052
PF3D7_0930800	27.5347983552621	0.184641207361104	0.441990146153343	0.417749601361123	0.676130202710335	0.959535588214052
PF3D7_1318300	8.90840848391665	-0.298124105646142	0.687684799865468	-0.433518533061171	0.664638105039169	0.959535588214052
PF3D7_0619400	51.0603615508179	-0.156797886530415	0.354809841038618	-0.441920906340782	0.6585464415702	0.959535588214052
PF3D7_1360900	26.0326174199622	0.18842033918895	0.450078032909741	0.418639270107937	0.675479785170292	0.959535588214052
PF3D7_0320700	23.9752057635327	0.200968492989105	0.474292341736418	0.423722829370056	0.671767963836633	0.959535588214052
PF3D7_0813100	8.57558068338048	-0.277532057921274	0.653636720769613	-0.424596796817809	0.671130628481281	0.959535588214052
PF3D7_1324400	8.01962948575743	-0.281967811843921	0.643915506088834	-0.437895669816376	0.661461914727978	0.959535588214052
PF3D7_0103100	15.4840639127544	-0.233317126930733	0.55438674502838	-0.420856250664487	0.67386005342225	0.959535588214052
PF3D7_0909300	8.89678714163722	0.275069650157957	0.660209528344921	0.416639927702239	0.676941799878931	0.959535588214052
PF3D7_1439000	8.89803571106819	0.275906631301352	0.645091762137081	0.427701371332536	0.668868551359867	0.959535588214052
PF3D7_1474900	16.3213952774806	-0.223819170502944	0.536275442384443	-0.4173586049508	0.676416128215874	0.959535588214052
PF3D7_0316200	15.6396412399432	-0.225923673905174	0.535524005333827	-0.421874036747132	0.673116961793499	0.959535588214052
PF3D7_0922600	12.0177514521059	0.252073900626452	0.601860025343734	0.418824793160981	0.675344183792181	0.959535588214052
PF3D7_0423500	33.8708604373834	-0.194860662840976	0.445848161197062	-0.437056109680462	0.662070656497197	0.959535588214052
PF3D7_1409300	12.923620412769	0.250800976928233	0.572440676230436	0.438125708640721	0.661295158995845	0.959535588214052
PF3D7_0807500	20.8062740764408	-0.216978477346497	0.50617264069002	-0.4286649650813	0.668167060418423	0.959535588214052
PF3D7_0614400	8.91284240614719	0.281704819225613	0.657930529895668	0.42816803055223	0.668528789875516	0.959535588214052
PF3D7_1316100	13.9230995579224	0.23626917069331	0.564741355416575	0.418367042588954	0.675678779112356	0.959535588214052
PF3D7_1347200	155.553352060336	-0.126410225313571	0.282389649349693	-0.447644683878028	0.654409649269372	0.959535588214052
PF3D7_0501100	15.7901597103141	0.228940727430483	0.541544507971256	0.422755145810904	0.672473916458319	0.959535588214052
PF3D7_1204300	103.101797918654	0.131917804942551	0.299833948203695	0.439969542251203	0.659959167095558	0.959535588214052
PF3D7_1033700	12.7118743217039	0.277634499696246	0.616766338443628	0.450145350663656	0.652605638337169	0.959535588214052
PF3D7_1356100	12.7227925714208	0.251839634250375	0.5757005097704	0.437449038130631	0.661785727142834	0.959535588214052
PF3D7_1325100	30.2435178334429	-0.195453133782359	0.437251922646159	-0.447003486227155	0.654872542753715	0.959535588214052
PF3D7_1145500	8.41849186837136	-0.282237676866638	0.6734096556298	-0.419117359703846	0.675130364249508	0.959535588214052
PF3D7_1030500	12.0062624504662	-0.266890487308004	0.60854168740289	-0.438573877242541	0.660970328701381	0.959535588214052
PF3D7_0919900	35.8470305780039	-0.18445064629096	0.442743743622129	-0.41660813720811	0.676965056460576	0.959535588214052
PF3D7_1009800	11.5803426292532	-0.257618572864657	0.598841274157814	-0.430195085044799	0.667053736975782	0.959535588214052
PF3D7_1117100	10.2284073168109	0.27793674359671	0.620264129028066	0.44809417567356	0.654085231294962	0.959535588214052
PF3D7_1103100	83.8093013038866	-0.132787473074202	0.303227414132826	-0.437913812819166	0.661448762208556	0.959535588214052
PF3D7_1339700	11.9087238900484	0.24930612950791	0.591332391085403	0.421600665321755	0.673316520577821	0.959535588214052
PF3D7_1418000	9.16232474422517	0.299928998696683	0.685518390634815	0.437521447701699	0.661733225184735	0.959535588214052
PF3D7_1347300	15.3716325315057	-0.228554589288711	0.541228685015948	-0.422288388654005	0.672814532352978	0.959535588214052
PF3D7_1231100	14.7376527020863	0.249349164179741	0.58409303845882	0.426899736448958	0.669452357508593	0.959535588214052
PF3D7_1008100	38.8608179840318	-0.181057778249254	0.427398810724997	-0.42362723925723	0.671837686663936	0.959535588214052
PF3D7_0807900	19.2763134330361	-0.22135587099469	0.501871744918684	-0.441060635980923	0.659169100113406	0.959535588214052
PF3D7_1117700	80.3387854722385	0.136821085947106	0.330326469312018	0.414199583315464	0.678727946952119	0.960879262075586
PF3D7_0901700	16.1132573832785	0.233872424977499	0.575698467748209	0.406241180200234	0.684565399170684	0.963661329922421
PF3D7_1223300	12.9008502147625	-0.23533848490409	0.576849367874062	-0.407972163983492	0.683294111208921	0.963661329922421
PF3D7_1439600	11.4275330322809	-0.247348358916035	0.604823278037278	-0.408959720794327	0.682569220841888	0.963661329922421
PF3D7_1028200	11.3379659973464	0.242712730614495	0.597048499908085	0.406520962119258	0.684359858012667	0.963661329922421
PF3D7_0207500	13.427349119344	-0.228711772927219	0.562786891856502	-0.406391435615625	0.684455011462269	0.963661329922421
PF3D7_1227700	8.28594003939227	-0.266861576869208	0.650769090009842	-0.410071069701808	0.681753814177483	0.963661329922421
PF3D7_0823700	8.27064186702897	0.261286090606955	0.642955528076124	0.406382835510856	0.684461329494355	0.963661329922421
PF3D7_1405700	7.97375085040003	-0.268648385134837	0.661415699728248	-0.406171769501715	0.684616395201883	0.963661329922421
PF3D7_1235300	30.1564979376067	0.171656394005185	0.424165454805633	0.404692065467339	0.685703875255453	0.964501155960605
PF3D7_0414700	10.8874074236095	-0.241436783172245	0.602678278586261	-0.4006064126595	0.688709923622472	0.965963597371989
PF3D7_1468800	31.4808741330622	-0.176604990171645	0.440700405781966	-0.400737071839727	0.688613713749741	0.965963597371989
PF3D7_1411200	25.4021930906965	0.192124090317948	0.477325787196685	0.402500965737228	0.687315377771943	0.965963597371989
PF3D7_0617800	5652.21266076147	-0.0659468225292563	0.164351308501758	-0.401255232650312	0.688232219674615	0.965963597371989
PF3D7_0816700	9.98058763454563	0.252666459868522	0.634188086375616	0.398409344635454	0.690328470829234	0.966164846993906
PF3D7_0710600	45.4433243865864	-0.146047808135984	0.365585340074069	-0.399490329963433	0.68953194754271	0.966164846993906
PF3D7_0918900	8.68093269539661	0.255961142914814	0.64145962982655	0.399029231167714	0.689871665855075	0.966164846993906
PF3D7_1444700	8.09577631900015	0.252320785416819	0.648078932717672	0.38933650313046	0.697027236697647	0.966590345879235
PF3D7_0508900	19.0612403459333	0.213275994926122	0.541934031576642	0.393546045273519	0.693916222524465	0.966590345879235
PF3D7_1410900	8.00912757858111	-0.25627082339138	0.64886551511309	-0.394952139422473	0.692878209681164	0.966590345879235
PF3D7_1215900	13.5390769498393	0.222151696784339	0.568788664653301	0.390569838306727	0.696115223774428	0.966590345879235
PF3D7_0932800	17.9007521957784	0.220701492772447	0.560860269637363	0.393505307329305	0.693946304836734	0.966590345879235
PF3D7_0906600	18.4663375746974	0.204386450529429	0.522810339909102	0.390938041824048	0.695843033831212	0.966590345879235
PF3D7_0409600	10.3374091456232	0.238032107002516	0.608762350068926	0.391009902264103	0.695789916448687	0.966590345879235
PF3D7_0402400	27.3895439640647	-0.180162523138963	0.457724636703826	-0.393604601308665	0.693872983560119	0.966590345879235
PF3D7_0320300	17.3810255939687	0.217514757618941	0.550112864377923	0.395400238212771	0.692547533281598	0.966590345879235
PF3D7_1205400	9.9816320982843	0.24323982805022	0.614519580899298	0.395821118823031	0.692236996006115	0.966590345879235
PF3D7_0308200	15.1534869586636	0.228620255239311	0.587165162591303	0.389362771848306	0.697007807229836	0.966590345879235
PF3D7_0821900	8.70222388134125	-0.255813884685535	0.651553432582031	-0.392621497935747	0.694599059023652	0.966590345879235
PF3D7_1339300	75.5430534056905	0.133492580474591	0.340247729768771	0.392339371567038	0.694807476524859	0.966590345879235
PF3D7_0530000	12.0862042023333	0.233609905336818	0.601071929964317	0.388655489785868	0.697531012629654	0.966606798178611
PF3D7_1241200	13.8152282100006	0.226140049108193	0.592243502776019	0.381836268440613	0.702582815061205	0.96679488136761
PF3D7_1121100	10.2673239044037	-0.244137566747961	0.638179846293788	-0.382552924799778	0.702051280232864	0.96679488136761
PF3D7_1408400	9.52870552001335	0.248878827031113	0.651803827760458	0.381830876762782	0.702586814551118	0.96679488136761
PF3D7_1318400	11.7286957573606	0.225809757626037	0.584559506506524	0.386290454799945	0.699281568910504	0.96679488136761
PF3D7_1119900	8.05672292411443	0.251596052528578	0.653495520245962	0.385000424232262	0.700237101221369	0.96679488136761
PF3D7_0932100	11.6328523285141	-0.228323239434009	0.594928688451855	-0.383782533715359	0.701139634665528	0.96679488136761
PF3D7_1423700	30.3374094369168	0.166423528461432	0.433910087111028	0.383543811045001	0.701316592668578	0.96679488136761
PF3D7_0318200	29.9415322976268	-0.171661681798504	0.446412550005441	-0.384535967450762	0.700581243051158	0.96679488136761
PF3D7_1236700	8.42840882630475	-0.244521186161708	0.639306396654858	-0.38247886684875	0.702106201318627	0.96679488136761
PF3D7_1110400	49.6846785254391	-0.146305247121979	0.381860727499593	-0.383137716412943	0.701617655741459	0.96679488136761
PF3D7_0214100	13.2685720786562	-0.211281389405566	0.572419138032855	-0.369102595227064	0.712051254611027	0.967423280784445
PF3D7_0414000	17.3888875166138	-0.207307673112529	0.558175625303672	-0.371402232047923	0.710337963342927	0.967423280784445
PF3D7_0821800	20.7171904962348	0.183275340556189	0.48717099838105	0.376203306775738	0.706765757241937	0.967423280784445
PF3D7_0110400	14.5756309779765	0.206237400014819	0.55768244396585	0.369811533868992	0.711522920775018	0.967423280784445
PF3D7_0706400	50.6869697980275	0.135326631297589	0.366553750994144	0.36918632241674	0.711988850035222	0.967423280784445
PF3D7_1461000	9.49803186199552	0.236083637083233	0.630324485970572	0.374543020837454	0.708000355823587	0.967423280784445
PF3D7_1104100	15.9702707821432	-0.200408146235564	0.535211284821247	-0.374446787500936	0.70807193908457	0.967423280784445
PF3D7_1452400	13.8175445568772	0.215149482261942	0.566900185720959	0.379519159952866	0.704302379046699	0.967423280784445
PF3D7_0904600	12.3994808636401	0.216942531078176	0.572834202896048	0.378717838392665	0.704897405296085	0.967423280784445
PF3D7_1427400	11.5470625015146	-0.226376261529743	0.599548095959309	-0.377578151036454	0.705743998163317	0.967423280784445
PF3D7_1317000	11.6815097398752	0.226941492084924	0.605558946056015	0.37476366844712	0.70783623662511	0.967423280784445
PF3D7_1244100	15.3484635382687	-0.20456628075307	0.552073155483563	-0.370541981114604	0.710978702599693	0.967423280784445
PF3D7_0606500	8.08678589964415	0.252948460619633	0.664838473292019	0.380466039167576	0.703599501304929	0.967423280784445
PF3D7_1020000	10.5396118308779	-0.225546962390517	0.611838915180179	-0.368637817560356	0.712397703458062	0.967423280784445
PF3D7_1201900	10.9153052202549	-0.221099591355975	0.5966111257173	-0.370592471084326	0.710941090593619	0.967423280784445
PF3D7_1143500	20.7954406724333	-0.188289680615877	0.508783938120869	-0.370077878856203	0.711324463961008	0.967423280784445
PF3D7_1332400	9.4366917238318	-0.238750941420878	0.640223740625013	-0.372917975812329	0.70920949276454	0.967423280784445
PF3D7_1475600	14.2013629506679	-0.211051925304979	0.568660933308533	-0.371138428794563	0.71053442973591	0.967423280784445
PF3D7_0722700	12.4948211657217	-0.213504261432118	0.572791072789757	-0.372743695868466	0.709339211704459	0.967423280784445
PF3D7_0305700	10.7261000012287	-0.224569979700605	0.612321641577222	-0.366751661956869	0.713804266955517	0.968663939618502
PF3D7_0803400	13.9029866197779	0.209332725269369	0.571852443500882	0.366060734107969	0.714319756634553	0.968694493986816
PF3D7_1317800	29.1185168270445	-0.170673646442416	0.479049772568179	-0.356275393947975	0.721634334732373	0.969375678257614
PF3D7_0807600	14.6639018399495	0.210277819505646	0.584778115156418	0.359585651472953	0.71915701528357	0.969375678257614
PF3D7_1017100	8.74378208805403	-0.230002469239914	0.643813322076499	-0.357250248407541	0.720904471659512	0.969375678257614
PF3D7_1116100	30.4980276692435	0.161029007775427	0.451619690151503	0.356558873067309	0.721422070787086	0.969375678257614
PF3D7_0510200	11.5693225582634	-0.220285743024463	0.61102752865911	-0.360516887852626	0.718460629842808	0.969375678257614
PF3D7_1312900	16.6211395463846	-0.193635195612061	0.541982882412482	-0.357271791961675	0.720888345099729	0.969375678257614
PF3D7_0623100	20.9442435492916	0.178958222164635	0.498178867615915	0.359224836294356	0.719426898257338	0.969375678257614
PF3D7_0706100	11.0697199403855	0.223183509315688	0.627248160559162	0.355813732664805	0.721980064082176	0.969375678257614
PF3D7_1137500	12.4516496499156	-0.214916113562294	0.607939332122238	-0.353515724689254	0.723701842241181	0.969375678257614
PF3D7_0617100	12.7996250585161	0.211789606273859	0.598683824543931	0.353758691301201	0.723519733672166	0.969375678257614
PF3D7_1134500	18.156590680299	-0.203436340232553	0.557946271780981	-0.364616362760482	0.715397798834032	0.969375678257614
PF3D7_1131800	14.2552736673945	0.204487407342667	0.577794940070303	0.353910000177202	0.72340633240581	0.969375678257614
PF3D7_0826300	9.13691549213928	0.243793299931441	0.673122579504086	0.362182620750968	0.717215565847886	0.969375678257614
PF3D7_0916900	8.32646303018572	0.242773552068818	0.684119433406449	0.354870129708158	0.722686886990898	0.969375678257614
PF3D7_0928600	22.0647029322339	-0.17266494908922	0.48096929635905	-0.358993703748447	0.719599799442848	0.969375678257614
PF3D7_1109400	17.9437593730783	-0.183076589302389	0.513056716435598	-0.356834991995217	0.721215338643112	0.969375678257614
PF3D7_1451300	17.4136187878122	0.184606330245559	0.517630218176843	0.356637467757902	0.721363224327789	0.969375678257614
PF3D7_0815600	14.2966712899609	-0.210115228872075	0.585188446199468	-0.359055668710956	0.719553444478635	0.969375678257614
PF3D7_1250800	12.5488178996002	0.202821676970804	0.576688857493431	0.351700356848171	0.725062992915871	0.969876637903122
PF3D7_0525100	23.1719629765819	0.174073137534505	0.49494350318418	0.351703045730714	0.725060976165881	0.969876637903122
PF3D7_0727800	16.70959656237	0.195650430323244	0.558426669791362	0.35036011155474	0.72606845791588	0.969901101158875
PF3D7_1435400	13.2762389572168	0.205107812868094	0.584475653435186	0.350926187707901	0.725643724403814	0.969901101158875
PF3D7_0532400	19.9548854677639	0.188248683967274	0.538344740575483	0.349680548129882	0.726578453508897	0.969923003495233
PF3D7_1408200	8.44681479718581	0.238371732349715	0.685297063484226	0.347837084165766	0.727962537521393	0.971110920726095
PF3D7_1121600	313.457820125135	-0.0904409231207583	0.262211441787272	-0.344916005588085	0.730157517451568	0.97154577341008
PF3D7_1354300	8.53718209622208	0.223774380528343	0.645801206170025	0.346506600468362	0.728962024649772	0.97154577341008
PF3D7_0907700	15.757242878816	-0.18686851746582	0.542820395637134	-0.344254782922228	0.730654686312876	0.97154577341008
PF3D7_0410800	14.3477631367392	0.193976729128369	0.566947760286935	0.342142156148914	0.732243913699913	0.97154577341008
PF3D7_0506900	16.7320083000811	-0.184638304930301	0.535463687890604	-0.344819469752771	0.730230095031559	0.97154577341008
PF3D7_1124300	13.9674572893054	-0.204678248433905	0.595123918406523	-0.343925428139305	0.730902368192749	0.97154577341008
PF3D7_1416100	13.4324686954271	-0.194286426077351	0.566693281710134	-0.342842296437756	0.731717104257193	0.97154577341008
PF3D7_1323400	32.9791604482357	-0.150040141834418	0.438182276770659	-0.342414903085977	0.732038674578863	0.97154577341008
PF3D7_1208800	11.6881738832305	0.20627247334137	0.608892189713858	0.338766824120877	0.734785395497772	0.972185743511514
PF3D7_0902200	9.76432497692043	0.214159278329431	0.637248856824158	0.336068517088806	0.736819198798878	0.972185743511514
PF3D7_1033600	10.1022135408427	0.210006400485133	0.62879731041797	0.333981073083055	0.738393840938156	0.972185743511514
PF3D7_1145300	8.84766450416243	-0.214050132475671	0.643255612080643	-0.332760614063381	0.739314990897324	0.972185743511514
PF3D7_1450100	12.1626371271255	-0.200808460217071	0.612964711242483	-0.327601991654675	0.743212615852762	0.972185743511514
PF3D7_1008700	89.9478398936193	0.101530468176371	0.308543310294692	0.329063910280208	0.742107381933012	0.972185743511514
PF3D7_1426700	23.5081260178675	0.157649748377786	0.481095120897276	0.327689351918095	0.743146555198017	0.972185743511514
PF3D7_1127000	15.31282533512	0.201159472930156	0.601616483503744	0.334364962473479	0.738104175294671	0.972185743511514
PF3D7_1139900	13.6972002994631	0.196199780316725	0.581934506228032	0.33715096495729	0.736003099656608	0.972185743511514
PF3D7_1304500	21.0274347657469	-0.163585243233886	0.493444343643738	-0.331517110979375	0.740253918355023	0.972185743511514
PF3D7_1438700	10.8764140391489	0.199275100340696	0.606160065876597	0.328749964833982	0.742344684976675	0.972185743511514
PF3D7_0724700	18.4927162105574	0.177798682793903	0.527632938214007	0.336974191557746	0.736136355609837	0.972185743511514
PF3D7_1212700	59.2589342848215	-0.122003764244383	0.367768199500215	-0.33174092923255	0.740084892093788	0.972185743511514
PF3D7_0207400	10.7131281048661	0.207035611041803	0.613715949509352	0.337347613675874	0.735854870551106	0.972185743511514
PF3D7_0726900	9.00063519825123	-0.211397439315576	0.639210726920062	-0.330716351294919	0.740858750129951	0.972185743511514
PF3D7_1123400	13.9295851654513	0.196532505734652	0.59494786091713	0.330335679216817	0.741146336500874	0.972185743511514
PF3D7_1473200	57.4028444523304	0.117230144849217	0.344808004819422	0.339986726557035	0.733866523839583	0.972185743511514
PF3D7_0905100	17.8531223045392	0.173865820648115	0.531577008233395	0.327075509202191	0.743610774808043	0.972185743511514
PF3D7_1452500	9.83767739341747	0.20904328375259	0.625407918270317	0.334251098596158	0.738190087971405	0.972185743511514
PF3D7_0313700	8.02691424072485	-0.220233262238711	0.658342969268293	-0.334526641157096	0.737982190966316	0.972185743511514
PF3D7_1471100	229.344503123959	0.0869100738963073	0.260159763282068	0.334064241141234	0.738331082914469	0.972185743511514
PF3D7_0319100	8.2048027643943	-0.217984400097511	0.65684371874382	-0.331866460585777	0.739990097028435	0.972185743511514
PF3D7_1120100	43.436157526199	0.135132800846208	0.416165139495933	0.324709563635925	0.745400895825139	0.972481551804267
PF3D7_1402300	9.39847980365576	0.20406002501049	0.637292287588144	0.320198485035435	0.748817871557787	0.972481551804267
PF3D7_1365800	11.4231951649263	-0.195819082088224	0.607404550055945	-0.32238659073296	0.747159841455673	0.972481551804267
PF3D7_0704800	7.98332638237818	-0.217321450254842	0.669327463077649	-0.324686289212715	0.745418512560393	0.972481551804267
PF3D7_0630600	13.3097650825603	-0.187320755185305	0.582068415475314	-0.321819137072297	0.74758971565177	0.972481551804267
PF3D7_1010600	26.2562920603145	0.151204178523016	0.466558038522947	0.324084392590697	0.745874142714785	0.972481551804267
PF3D7_1137400	9.33493147803182	-0.206365035151569	0.644877626752781	-0.32000650447543	0.748963399769002	0.972481551804267
PF3D7_1414200	24.8499003361188	0.148297980467207	0.462285937771317	0.320792756929083	0.748367448684164	0.972481551804267
PF3D7_0604100	27.4212539546651	-0.153649812255958	0.479243491613309	-0.320609074394972	0.748506659997257	0.972481551804267
PF3D7_0507800	12.5844243033395	0.185440453940014	0.580249156816134	0.319587631902023	0.749280951364712	0.972481551804267
PF3D7_0708900	8.30737779837469	-0.218242514282728	0.670176026047815	-0.325649539524348	0.744689526337244	0.972481551804267
PF3D7_1340600	16.2247290378978	-0.169949790731726	0.535874561408744	-0.317144725595764	0.751133789057048	0.973600194918931
PF3D7_0713700	8.97532659599591	-0.198704747588185	0.626386754043383	-0.31722373805884	0.75107383903021	0.973600194918931
PF3D7_1140200	21.0595785375979	-0.15697155989665	0.49625199619355	-0.31631421354611	0.751764023751516	0.973774757199557
PF3D7_0507200	8.85963489058317	-0.202141835723389	0.641783684356574	-0.314968798133358	0.752785344480207	0.97381382613799
PF3D7_0210000	36.3778796757698	0.129920944120193	0.412447783995438	0.314999738540553	0.752761852382225	0.97381382613799
PF3D7_1123300	13.9888450252192	0.173706216025404	0.554528417077141	0.313250341508178	0.754090474545348	0.974860383211585
PF3D7_0621800	22.1472083086251	0.152027962684594	0.495383374796198	0.306889513091026	0.758927471512499	0.975976754922814
PF3D7_1331300	15.778486297851	-0.188655558858217	0.609871183571232	-0.309336731985767	0.757065392135048	0.975976754922814
PF3D7_1011800	81.0787692893369	-0.096532700477727	0.310144116015226	-0.311251110348287	0.755609730825479	0.975976754922814
PF3D7_0111000	8.79529846330809	-0.203155822154576	0.654167336526654	-0.310556352803009	0.756137912863369	0.975976754922814
PF3D7_1453800	15.1216559648913	-0.178051253800657	0.580003548630329	-0.306983042122971	0.758856279858107	0.975976754922814
PF3D7_1142100	23.8531462621966	-0.141390920335283	0.460214517184825	-0.307228292580131	0.758669611853583	0.975976754922814
PF3D7_1129900	15.3794779458926	0.16929066687244	0.547761819527861	0.309058902678465	0.757276720661905	0.975976754922814
PF3D7_0713800	8.01422253808233	0.212241252137067	0.688286049062227	0.30836198471005	0.757806905274467	0.975976754922814
PF3D7_0728600	16.531791141221	-0.16045312793003	0.531581040005645	-0.301841329646231	0.762773022889408	0.978584976709696
PF3D7_1214000	9.26674164619378	-0.18913100753515	0.627066752462634	-0.301612239514197	0.762947676498348	0.978584976709696
PF3D7_1211900	29.409403947684	-0.136577024876793	0.451242111472678	-0.302669058149424	0.762142080393807	0.978584976709696
PF3D7_1236200	13.8869400043494	-0.175935520195735	0.581241993196084	-0.302688935512583	0.762126930660711	0.978584976709696
PF3D7_1210100	15.2170323696562	0.169417053011987	0.567508408308374	0.298527828895054	0.765300339469392	0.978669281746061
PF3D7_1320800	8.33270315803525	0.195794776773373	0.653064043781103	0.299809457644861	0.764322500840497	0.978669281746061
PF3D7_1358700	45.1952344168928	0.112422348870336	0.376005186844261	0.298991484170404	0.764946543174954	0.978669281746061
PF3D7_0721100	43.4749908478921	0.111899588107791	0.375172869759802	0.298261407279883	0.765503657019692	0.978669281746061
PF3D7_1417800	16.3713415155966	-0.157835355580606	0.528251156535102	-0.298788471407952	0.765101447842973	0.978669281746061
PF3D7_0705900	26.3971553973104	-0.141868916233329	0.480029485157528	-0.295542087767323	0.767579805971933	0.978970939858762
PF3D7_1116700	50.2449172356341	-0.114550096654811	0.387179534253348	-0.295857829561457	0.767338657168836	0.978970939858762
PF3D7_0204100	21.8733918101668	-0.156950542505662	0.531419159249933	-0.295342273182602	0.767732426627151	0.978970939858762
PF3D7_1114100	15.979466587234	0.157717018661628	0.532036418438508	0.296440268364556	0.76689387679174	0.978970939858762
PF3D7_0920900	8.9478627439803	-0.136936400187807	0.659618468488763	-0.207599402881394	0.835541770639428	0.979398771667299
PF3D7_1342400	31.167811669951	-0.114289436508798	0.441444046760929	-0.258899032272357	0.795713144871184	0.979398771667299
PF3D7_0515900	12.2025494354308	0.149772226357459	0.601911405175811	0.248827693028531	0.803494068747227	0.979398771667299
PF3D7_1450000	22.3381877704817	0.112175687095926	0.476147421458383	0.235590243778587	0.813750644732108	0.979398771667299
PF3D7_0422800	9.46304495320502	-0.13766237230315	0.624471391082265	-0.220446243445306	0.82552363402414	0.979398771667299
PF3D7_0523800	9.58191175553483	0.174553202429657	0.631807178624114	0.276276067026939	0.782336036561569	0.979398771667299
PF3D7_1327000	7.89382680922226	-0.141093420124419	0.650557878416812	-0.216880657056651	0.828301352270403	0.979398771667299
PF3D7_1426600	7.79645736847676	-0.152806418155426	0.695354250223899	-0.219753338828695	0.826063261488486	0.979398771667299
PF3D7_1448000	8.23330311237178	-0.154928812819407	0.689102809546719	-0.224826848291791	0.822113978798621	0.979398771667299
PF3D7_0518300	29.8864768479105	0.109878799695834	0.446008225169247	0.246360478339022	0.805403197240966	0.979398771667299
PF3D7_1221300	9.31994804509449	-0.180150639730148	0.627708259349193	-0.286997402132207	0.774114309400153	0.979398771667299
PF3D7_1423800	10.0001311008099	0.179238111078762	0.667136208431191	0.268667940389941	0.788185224797581	0.979398771667299
PF3D7_0406000	10.0056579349935	-0.120224208797195	0.610933296926464	-0.196787782564855	0.843993612273531	0.979398771667299
PF3D7_1302000	10.0304146674577	-0.141888184511475	0.644014634459964	-0.220318261293014	0.825623299097387	0.979398771667299
PF3D7_1364400	16.8274679707457	-0.125585205692365	0.529793144033317	-0.237045735881526	0.812621309096903	0.979398771667299
PF3D7_0529300	7.99363411298624	-0.166565295419126	0.678818215394719	-0.245375406318865	0.806165769936425	0.979398771667299
PF3D7_1104300	15.4082846790262	0.137922284172366	0.579189841338987	0.238129667215007	0.811780525359386	0.979398771667299
PF3D7_1368800	8.91995597149495	0.15384533972414	0.648665262489364	0.237172157383197	0.812523235332273	0.979398771667299
PF3D7_1222500	9.34652102090193	-0.146555070161508	0.64032321020144	-0.228876710740195	0.818964742270667	0.979398771667299
PF3D7_1347500	122.5935237948	-0.082634842485457	0.288694959653065	-0.286235833783735	0.774697499966966	0.979398771667299
PF3D7_0212900	9.00538059568567	0.136845520522107	0.655832668455595	0.208659200897023	0.834714291980514	0.979398771667299
PF3D7_0220600	15.2992991722606	-0.127215201084838	0.547632245659833	-0.232300420753271	0.81630468566248	0.979398771667299
PF3D7_1143200	12.9947052025831	0.156312991543191	0.596670113046188	0.261975567613341	0.793340278744465	0.979398771667299
PF3D7_0935200	12.60740567631	-0.115330976566984	0.594905191222006	-0.19386446490756	0.846282008679518	0.979398771667299
PF3D7_0524500	13.2704645734064	-0.160770419254969	0.566955609644327	-0.283567913466499	0.776741529452325	0.979398771667299
PF3D7_1457600	8.37648519295018	0.147192334484922	0.641015571236783	0.22962364892467	0.818384228668394	0.979398771667299
PF3D7_0416400	17.7314444366586	-0.150816268394881	0.533004384687411	-0.282955023875328	0.777211314343024	0.979398771667299
PF3D7_0717200	14.0569167685167	0.118575499753673	0.558220234130429	0.212417057827337	0.831781679191151	0.979398771667299
PF3D7_0215400	9.15682320792814	-0.149150311037235	0.623782512499754	-0.239106271895196	0.811023178549222	0.979398771667299
PF3D7_0904800	12.697551430944	-0.130397595000021	0.57783539653628	-0.225665640737248	0.821461483472061	0.979398771667299
PF3D7_0629500	16.5581774500461	-0.144296345709281	0.529378388840494	-0.272576948268206	0.785178433771302	0.979398771667299
PF3D7_1353900	26.0666097247035	0.0908201989779484	0.45183747746188	0.201001916636299	0.840697075395056	0.979398771667299
PF3D7_0319600	25.786612074472	-0.0966266635299724	0.484961798520453	-0.199245927874662	0.842070374330133	0.979398771667299
PF3D7_1126000	12.6784573866723	-0.158370849539152	0.574039582555228	-0.275888378348744	0.782633800371014	0.979398771667299
PF3D7_1022900	14.3621779424803	-0.121558372757038	0.569070916932415	-0.213608478557119	0.830852387070483	0.979398771667299
PF3D7_1104400	71.3547927986782	0.0842029726777357	0.331947911843626	0.253663209417633	0.799755759180608	0.979398771667299
PF3D7_1427300	16.6731478392371	0.105190070312036	0.544520518731228	0.193179258987589	0.846818581711319	0.979398771667299
PF3D7_1243100	8.49896810609865	-0.151929835494511	0.652247468308857	-0.232932809825133	0.815813580536126	0.979398771667299
PF3D7_1123800	12.1471620535246	0.118914801791179	0.614306795142454	0.193575592409983	0.846508211113778	0.979398771667299
PF3D7_0507600	7.70530931399603	0.168462160222828	0.664560764278049	0.253493990735127	0.799886504257685	0.979398771667299
PF3D7_0203400	23.6857598090827	-0.0957696722365499	0.472140091479607	-0.202841643751167	0.839258807465509	0.979398771667299
PF3D7_1019500	15.6406172886192	-0.114774644037706	0.542547778997583	-0.211547532734839	0.832460045596224	0.979398771667299
PF3D7_0418200	21.3782534974983	-0.119514401914739	0.517807380219187	-0.230808610460803	0.817463491653159	0.979398771667299
PF3D7_1133300	8.09321174119195	-0.186937458616121	0.658326023511484	-0.283958786284955	0.776441964861432	0.979398771667299
PF3D7_1111300	8.09988581367126	-0.166929128651259	0.706166110182354	-0.236387906817211	0.813131679284518	0.979398771667299
PF3D7_1012500	12.8331778703889	0.143972974957945	0.582564721241068	0.247136446318329	0.804802628277991	0.979398771667299
PF3D7_1472400	7.71442679773249	-0.1322017091643	0.664420824738361	-0.198972856120756	0.842283977717378	0.979398771667299
PF3D7_1213600	21.0764719039953	-0.147102283448884	0.510819248119723	-0.287973258623971	0.77336720850598	0.979398771667299
PF3D7_1226400	13.975982645927	-0.116314340995337	0.55754694386963	-0.208618022705071	0.834746440050161	0.979398771667299
PF3D7_0812500	19.3742360236152	0.11323107044366	0.499978447242885	0.226471903075161	0.820834409665406	0.979398771667299
PF3D7_1144900	17.731063593108	-0.125046965421226	0.527057336579582	-0.237254956420371	0.81245900407637	0.979398771667299
PF3D7_1321500	22.0068027159448	0.108636638756682	0.502132738239049	0.216350439801366	0.828714594662444	0.979398771667299
PF3D7_0823300	20.7316318251258	0.120736263363719	0.485584483656396	0.248641106599183	0.803638408339813	0.979398771667299
PF3D7_1403400	10.3715716867	-0.137489585295595	0.615691523019805	-0.223309206242186	0.823294862624388	0.979398771667299
PF3D7_0422200	17.1115405699424	0.117752660140194	0.538733546688635	0.218573097710304	0.826982611000851	0.979398771667299
PF3D7_1107100	9.01953359970067	0.142054683348088	0.635871487854652	0.223401561575535	0.823222989076925	0.979398771667299
PF3D7_1001700	20.5319921607019	-0.144579941997522	0.506435945385461	-0.285485150323361	0.775272479581624	0.979398771667299
PF3D7_1002200	21.9678180628801	0.127281643181064	0.491873451608365	0.258769085350854	0.795813411926811	0.979398771667299
PF3D7_0717000	12.1276943435742	-0.158747889833445	0.608267603354667	-0.260983634436443	0.794105127845869	0.979398771667299
PF3D7_0810300	40.7775441808194	-0.0977555211289542	0.384453731286474	-0.254271224789108	0.79928602868204	0.979398771667299
PF3D7_1329000	8.33657400130815	0.145810387133539	0.643856773408509	0.226464010561906	0.820840547545374	0.979398771667299
PF3D7_1134000	22.2328368751289	0.098144356799227	0.475262839502178	0.206505429505134	0.83639612401305	0.979398771667299
PF3D7_1304900	12.6977456075123	-0.164779236133861	0.603534586678801	-0.273023683763721	0.78483500994819	0.979398771667299
PF3D7_0708700	13.4241231546744	0.126880575479662	0.592628172357742	0.214098116488242	0.830470544569198	0.979398771667299
PF3D7_0716400	8.53454893997202	-0.155077252091257	0.639998222557478	-0.242308879345878	0.808540834034031	0.979398771667299
PF3D7_0619800	12.5542002306934	0.158204595775662	0.58308870470876	0.271321660834918	0.786143648149541	0.979398771667299
PF3D7_0714500	8.68550023830942	0.173253885329977	0.655862170497603	0.264162034530105	0.791655064294065	0.979398771667299
PF3D7_1404100	24.2729870526765	-0.103645848844987	0.471769827695713	-0.219695798163332	0.826108077305066	0.979398771667299
PF3D7_1218200	9.74050212924023	0.155845203173174	0.631959114694019	0.246606464800545	0.805212800863918	0.979398771667299
PF3D7_0908300	12.6301674114464	0.141853851925493	0.582099764955358	0.243693367470046	0.807468310531778	0.979398771667299
PF3D7_1417200	31.7332204196118	0.111955366448989	0.423257867809198	0.264508648187628	0.79138800176102	0.979398771667299
PF3D7_0506500	15.220292530441	0.118797044495826	0.544138235874935	0.218321442353355	0.827178668809973	0.979398771667299
PF3D7_1211400	26.7107461167385	-0.14612230950797	0.551827836047478	-0.264796916651732	0.791165912293068	0.979398771667299
PF3D7_0422100	11.19250861712	-0.134704380126029	0.589277822320275	-0.228592312528633	0.819185800094854	0.979398771667299
PF3D7_1405600	19.6469724187978	-0.105806420196694	0.501376852575244	-0.21103172125565	0.832862518724202	0.979398771667299
PF3D7_0306800	9.74401769882848	0.121794325592805	0.627909195095034	0.193968055483518	0.846200894867997	0.979398771667299
PF3D7_0107500	47.5739709746658	0.106780760060189	0.366749306426114	0.291154633939849	0.770933057058989	0.979398771667299
PF3D7_0405200	10.48933425931	-0.180485222926969	0.616503416430322	-0.292756241274403	0.769708477864969	0.979398771667299
PF3D7_1033300	13.7206410235501	-0.128793521191347	0.565038801538054	-0.227937481179641	0.819694843821017	0.979398771667299
PF3D7_0509400	15.2001035042688	0.150248373343896	0.549958403882656	0.273199522515077	0.784699847001664	0.979398771667299
PF3D7_1023900	108.571197056323	0.0910087785217665	0.351821372306504	0.258678936771585	0.795882972559148	0.979398771667299
PF3D7_0603800	9.30511673343361	0.189698084330179	0.663205616146172	0.286032083733695	0.774853548383627	0.979398771667299
PF3D7_0625600	9.22667031071943	0.130217867227285	0.638053376332293	0.204086165918929	0.83828616482436	0.979398771667299
PF3D7_1133800	21.2427721648372	0.103535537109142	0.529228766117065	0.195634749540881	0.844896059600712	0.979398771667299
PF3D7_0810100	14.9355936080143	-0.1372550468713	0.578234101070294	-0.237369339887159	0.812370273311906	0.979398771667299
PF3D7_1351000	13.7076096879648	0.130545068270894	0.564207588193811	0.231377725153973	0.817021368446201	0.979398771667299
PF3D7_1432700	17.2769907298254	-0.104898162280541	0.519941910003843	-0.201749772930915	0.840112349401988	0.979398771667299
PF3D7_1416200	10.8545612405007	-0.136303825868965	0.613865520079823	-0.222041833936594	0.824281317295712	0.979398771667299
PF3D7_1244400	18.6335443753217	-0.116716662613789	0.513163981430736	-0.227445157566154	0.820077609585299	0.979398771667299
PF3D7_1333200	13.4820927393102	-0.140872888907945	0.597402873585769	-0.235808857199479	0.813580994904506	0.979398771667299
PF3D7_1205800	29.2819128820909	-0.11940103330065	0.439444521399021	-0.271709004177645	0.785845777347026	0.979398771667299
PF3D7_1127600	16.0938067852795	-0.120869678228369	0.532583341335746	-0.2269497914171	0.820462784084253	0.979398771667299
PF3D7_0809600	17.3197108622917	-0.124715333281795	0.520941581988445	-0.239403682857786	0.810792574523205	0.979398771667299
PF3D7_0722600	9.46287488024866	0.147402769589911	0.624694915401351	0.235959611573288	0.813464010596138	0.979398771667299
PF3D7_1104800	13.4725997968826	-0.150347620573577	0.579432237281293	-0.259474034926002	0.795269513283412	0.979398771667299
PF3D7_0820900	7.83084923552108	0.150826294419324	0.657095690422914	0.229534749074751	0.818453315614308	0.979398771667299
PF3D7_0704300	24.5264343823352	-0.136643281717311	0.484744472064002	-0.281887240787905	0.778029973357055	0.979398771667299
PF3D7_1341900	18.1166318851265	0.12223079951625	0.537018306275275	0.227610116988442	0.819949354164378	0.979398771667299
PF3D7_1346400	43.1178731755941	0.105101994390791	0.390714535458235	0.268999448068976	0.787930107395532	0.979398771667299
PF3D7_1459800	25.9380212576718	0.11062525123194	0.497001803613045	0.222585210813582	0.823858347772138	0.979398771667299
PF3D7_1304400	15.659076033821	0.131268150156226	0.587483281605522	0.22344150764169	0.823191902371348	0.979398771667299
PF3D7_1224000	11.2470564308846	0.118955741071096	0.589273331628372	0.201868529740483	0.840019505188478	0.979398771667299
PF3D7_1428300	14.7385772793165	0.164395879182917	0.595735775173722	0.275954350962015	0.782583127937102	0.979398771667299
PF3D7_1302500	13.2191789903739	0.165606284873893	0.583848863710817	0.283645811728287	0.776681825640972	0.979398771667299
PF3D7_0811600	17.6381512249208	0.131950977695687	0.53679232371155	0.245813831284577	0.805826349704194	0.979398771667299
PF3D7_1451100	73.8982652465519	0.0657921756865298	0.322134515214944	0.204238206646779	0.838167355964913	0.979398771667299
PF3D7_1212500	24.0122886690723	-0.0941695820897633	0.458395344856392	-0.205433111715533	0.837233752504436	0.979398771667299
PF3D7_0420900	14.89478161104	-0.107590564397665	0.554660169674053	-0.193975645413463	0.846194951841771	0.979398771667299
PF3D7_0220000	48.4222615277375	-0.110867620027976	0.392401869155477	-0.282535912141764	0.777532613837379	0.979398771667299
PF3D7_1126400	8.62772613311667	0.134049086216283	0.651872410471705	0.205636998993842	0.837074474106741	0.979398771667299
PF3D7_0405400	28.4265065303449	-0.0883172641768856	0.437341300043431	-0.201941285143011	0.839962626028552	0.979398771667299
PF3D7_1314500	19.8821689768624	0.096782808820104	0.500277780354769	0.19345813989874	0.846600186256277	0.979398771667299
PF3D7_1314900	9.78218772709192	0.154249571128634	0.639286917622161	0.241283791169023	0.809335172608315	0.979398771667299
PF3D7_1445400	10.8479301765973	-0.175037236544742	0.595106989758923	-0.294127341061225	0.768660599290354	0.979398771667299
PF3D7_1309200	17.6044371525524	0.114001612948285	0.518077947927988	0.220047221473574	0.825834378455999	0.979398771667299
PF3D7_0614300	44.0099283020385	0.103205458731316	0.391219181804039	0.263804699594234	0.791930413070225	0.979398771667299
PF3D7_0720700	19.27769880976	0.11353087112464	0.529545131996064	0.214393191939462	0.830240450290066	0.979398771667299
PF3D7_1126900	12.3516998044085	0.144966649024319	0.582959325002311	0.248673694384671	0.803613198587007	0.979398771667299
PF3D7_0403200	8.82902099854647	0.143171204018747	0.646013876206418	0.221622490308551	0.82460777310238	0.979398771667299
PF3D7_1353600	23.5724030059199	0.101445515335978	0.486283841010088	0.208613790508153	0.834749744168174	0.979398771667299
PF3D7_1458700	14.4729623086582	-0.15198279811551	0.578576727642687	-0.262683911837827	0.792794217930717	0.979398771667299
PF3D7_0910500	9.9190443439737	0.152586876167458	0.617397807104153	0.247145154083317	0.804795889460152	0.979398771667299
PF3D7_1334800	9.84159124526627	0.14411105361419	0.621142404782775	0.232009684904041	0.81653049156234	0.979398771667299
PF3D7_1015600	12.3705729855827	-0.145424684273358	0.59112067409603	-0.246015222688241	0.805670448583442	0.979398771667299
PF3D7_0511800	18.3919328581174	0.117897240132639	0.514571399015857	0.229117359336572	0.81877770150578	0.979398771667299
PF3D7_0819600	33.1092587734544	-0.114761945841096	0.411748920235527	-0.278718267859573	0.780461042124801	0.979398771667299
PF3D7_0709000	20.1757236360787	0.109371163014323	0.494921091977147	0.220987072055061	0.825102499153481	0.979398771667299
PF3D7_0715800	10.3026761793821	0.183470788060029	0.626986199712945	0.292623327505499	0.769810081118298	0.979398771667299
PF3D7_0915400	37.2068467809908	0.0912620720456413	0.393265675811045	0.232062134223711	0.816489754606786	0.979398771667299
PF3D7_0827800	17.1489213798914	0.108413945730733	0.520750412315842	0.208187921059156	0.83508223956748	0.979398771667299
PF3D7_0309500	40.3994285691658	-0.0947647381279249	0.40504975486436	-0.233958265595443	0.815017378758585	0.979398771667299
PF3D7_0306300	16.6650142633533	-0.111331475199834	0.52185413171689	-0.21333830362434	0.831063099191913	0.979398771667299
PF3D7_0812700	9.5366602880914	-0.136338389643269	0.634639035460502	-0.214828244128319	0.829901231343845	0.979398771667299
PF3D7_0711000	21.8335237904799	-0.126539002702137	0.512100382978965	-0.247098043485225	0.80483234786776	0.979398771667299
PF3D7_1218600	12.7915510852342	0.140407294049802	0.600716804381334	0.23373292211195	0.815192327424965	0.979398771667299
PF3D7_1458300	9.34438987475355	0.128363712768446	0.648212591432286	0.198027181923163	0.843023796740183	0.979398771667299
PF3D7_1446500	28.8253777025872	0.0979994131959282	0.471620092548585	0.207793125747357	0.835390500326456	0.979398771667299
PF3D7_1224100	11.8102923834751	0.144762239550484	0.598348383443201	0.241936376124974	0.808829463183136	0.979398771667299
PF3D7_0618500	7.91378615983622	-0.166536738466355	0.660858903044638	-0.25200044623611	0.801040718884008	0.979398771667299
PF3D7_1136000	15.0825613593977	-0.145679775937327	0.572818082452485	-0.254321189222253	0.799247431210043	0.979398771667299
PF3D7_1208300	14.5987149621248	0.108959957325953	0.555264457133153	0.196230743614524	0.844429565891091	0.979398771667299
PF3D7_0905900	10.4728218998424	-0.133043438888521	0.603879099775885	-0.220314693682721	0.825626077385519	0.979398771667299
PF3D7_0708800	39.8546441839052	0.0975410819261656	0.402285292968733	0.24246743202155	0.808417989511162	0.979398771667299
PF3D7_1022400	23.3350446417932	0.126349142059864	0.494958040994485	0.255272430378138	0.798512692075865	0.979398771667299
PF3D7_1361100	24.0296943242862	-0.108514553298264	0.493931135642724	-0.21969571356756	0.826108143193296	0.979398771667299
PF3D7_0711100	8.92044856544256	0.126765905086819	0.644744878850429	0.196614055024122	0.844129570983237	0.979398771667299
PF3D7_1441300	11.0610352846155	0.12613814379869	0.59977125717339	0.210310417996946	0.833425404731639	0.979398771667299
PF3D7_1109900	73.9802313387157	-0.0731684821104037	0.337196319051231	-0.216990749828698	0.828215553773326	0.979398771667299
PF3D7_1401800	24.4354087972803	0.117209803220501	0.490078602630389	0.23916531468912	0.810977397135943	0.979398771667299
PF3D7_1134600	7.82387821191647	-0.169558627173398	0.676901218066561	-0.250492424371329	0.802206562479912	0.979398771667299
PF3D7_0522400	38.6411348584102	-0.0897606558376132	0.406232626051369	-0.220958756341404	0.825124546914074	0.979398771667299
PF3D7_1129100	87.3215298373974	-0.0746031698733744	0.301926477147423	-0.247090518785299	0.804838171194996	0.979398771667299
PF3D7_0615500	13.1889119091519	0.159232742656197	0.565441367189151	0.281607876423606	0.778244200034751	0.979398771667299
PF3D7_0608900	106.228034989324	0.0826256775426891	0.287231889227876	0.287661922792764	0.773605539713281	0.979398771667299
PF3D7_0322300	15.3267641409395	0.138754140407809	0.558170615751389	0.248587325259004	0.803680013770464	0.979398771667299
PF3D7_0823200	92.0252941943503	-0.0645481164381406	0.291754540589548	-0.221241171800474	0.824904652984232	0.979398771667299
PF3D7_0931200	13.5716947602647	-0.118950925428649	0.568257236068803	-0.209325843787841	0.834193878214567	0.979398771667299
PF3D7_1438900	43.8873586046656	-0.104305544827567	0.376114564121655	-0.277323865591733	0.781531435859825	0.979398771667299
PF3D7_0717700	15.4194477868524	0.104612019271725	0.553814096965524	0.18889374583442	0.85017609543877	0.980271361584184
PF3D7_1443900	16.5923594997802	0.095259563944634	0.537456331630794	0.177241495426409	0.859318702966162	0.980271361584184
PF3D7_1413400	7.80952290017719	-0.119776797038393	0.665770404102456	-0.179907061503985	0.85722553137975	0.980271361584184
PF3D7_1146600	25.9766429640867	0.0912825776334197	0.506625164456547	0.180177740936611	0.857013032604134	0.980271361584184
PF3D7_0520900	66.1959009136006	-0.0574691822078824	0.337528446409769	-0.17026470752072	0.864801965275349	0.980271361584184
PF3D7_0922500	48.6180818153789	0.0640259208815483	0.389850175834096	0.164232120056283	0.869548416246244	0.980271361584184
PF3D7_1235700	11.5134940488999	-0.0985197346255256	0.584698550212287	-0.168496628886383	0.866192595516272	0.980271361584184
PF3D7_0926700	8.9560549691819	0.115491293007094	0.665697702908536	0.173489096481022	0.862266997677978	0.980271361584184
PF3D7_1464900	9.24616263725175	0.110116981844367	0.624157579088685	0.176424969484702	0.859960089510296	0.980271361584184
PF3D7_0617200	54.727947446925	0.0550029563423682	0.349436187250576	0.157404866322349	0.874925778494721	0.980271361584184
PF3D7_1135800	15.1651340341882	-0.101404534872737	0.554690639395075	-0.182812774672608	0.854944924793228	0.980271361584184
PF3D7_1119400	22.4473762662763	0.0840225702009612	0.485189231708598	0.173174845420775	0.862513995341868	0.980271361584184
PF3D7_1317100	29.8628669183833	-0.0733387220851395	0.445708994913355	-0.164543957878607	0.869302944910397	0.980271361584184
PF3D7_0806500	8.56406083561554	0.110633359278047	0.641016492004678	0.172590503767007	0.862973316776971	0.980271361584184
PF3D7_1234100	26.6099624147077	0.0740761041968792	0.443578490491835	0.166996610035677	0.867372716270386	0.980271361584184
PF3D7_1025900	13.1281238041584	-0.101548817575416	0.5830357877892	-0.174172528860495	0.861729874327379	0.980271361584184
PF3D7_0824800	12.8653795016529	-0.115099834413526	0.622874593803484	-0.184788134816492	0.853395214633467	0.980271361584184
PF3D7_1470800	8.09259208286389	0.120057445067424	0.656203608038033	0.182957611931425	0.854831277934656	0.980271361584184
PF3D7_1205600	22.6259772937068	0.086832889259862	0.506778169830939	0.17134299468509	0.863954075432728	0.980271361584184
PF3D7_1451900	7.92716653956278	0.105988351587191	0.670363784835272	0.158105724063295	0.874373490196154	0.980271361584184
PF3D7_0601900	22.0049690338916	0.087238694159315	0.478658546569431	0.182256631129976	0.855381331929818	0.980271361584184
PF3D7_1139400	12.5958426565899	0.0973031018922659	0.587108822172439	0.165732651627039	0.868367349103432	0.980271361584184
PF3D7_0715300	11.1052413350362	0.113075047705117	0.597077222232033	0.18938094352756	0.849794259074253	0.980271361584184
PF3D7_1319300	8.48049467343904	-0.110607830639064	0.65495406347745	-0.168878760827586	0.865892005634382	0.980271361584184
PF3D7_1037800	8.40471415966833	-0.106840290608172	0.664436841968553	-0.160798263822385	0.872252292711808	0.980271361584184
PF3D7_0827900	89.4137752234543	0.0509452195653284	0.302757993966633	0.168270435729413	0.866370531073982	0.980271361584184
PF3D7_0106300	37.8727408700822	-0.0693384296008403	0.391605929721089	-0.177061745847988	0.859459889499697	0.980271361584184
PF3D7_1417700	19.4203963189467	-0.0857029462549185	0.515927038149584	-0.166114469523248	0.868066867326118	0.980271361584184
PF3D7_1250700	17.4288995214656	-0.0862529692192206	0.541031255659799	-0.159423264953581	0.873335410529744	0.980271361584184
PF3D7_1225800	22.522520527693	0.0787773996393052	0.494881367542017	0.159184412277589	0.873523584466755	0.980271361584184
PF3D7_1017400	10.8830871583441	-0.0959839020743101	0.605421845821257	-0.15854053291405	0.874030883872303	0.980271361584184
PF3D7_0203000	20.6293285219955	-0.0937654679793998	0.490745054995368	-0.191067575770651	0.848472650404478	0.980271361584184
PF3D7_1229500	10.1927997964083	-0.113371280570238	0.635430186130936	-0.178416579892975	0.858395829330745	0.980271361584184
PF3D7_0909700	11.1717685110615	0.104696238643441	0.593896936392763	0.17628688115374	0.860068567956442	0.980271361584184
PF3D7_0524000	52.1150423641793	-0.0644869524687942	0.368155569733197	-0.175162235126656	0.86095215751863	0.980271361584184
PF3D7_1408100	33.2969182857128	0.0709754316474375	0.451218819087287	0.157297144190494	0.875010670849191	0.980271361584184
PF3D7_1306600	9.5450566189853	0.10365088570838	0.634398614707197	0.163384476739785	0.870215724420032	0.980271361584184
PF3D7_0709300	10.9784196012491	0.101301097388117	0.595279446695038	0.170174021546578	0.864873281512822	0.980271361584184
PF3D7_0913200	42.9343544166583	0.0646621564552329	0.389392402708791	0.166059111593892	0.868110431544913	0.980271361584184
PF3D7_1021400	9.09686860986759	0.104976121327387	0.639703163616071	0.164101300881466	0.869651397741769	0.980271361584184
PF3D7_1409700	8.5789515864991	-0.109750288862417	0.675286438003609	-0.162524053032782	0.870893188492369	0.980271361584184
PF3D7_0725000	9.27265044059132	-0.101211401297998	0.635226728455357	-0.159331143927315	0.873407984862483	0.980271361584184
PF3D7_1337500	9.87669659218802	-0.112075052039072	0.666027633950246	-0.168273876827525	0.866367824072585	0.980271361584184
PF3D7_1332800	8.77985567925424	-0.124460006414781	0.680241595327027	-0.182964416274701	0.854825938966493	0.980271361584184
PF3D7_0707400	8.63262500948146	-0.114411537329141	0.650444237779649	-0.175897533845016	0.860374442851366	0.980271361584184
PF3D7_1333700	10.0898347796581	0.109784935869349	0.634336735651077	0.173070436724221	0.862596062334317	0.980271361584184
PF3D7_1127500	10.0935114463627	0.101210689305541	0.631909952558825	0.160166316253928	0.872750062540022	0.980271361584184
PF3D7_0213000	9.94503220715899	0.118983618388816	0.653243154138682	0.182142924323025	0.855470563377857	0.980271361584184
PF3D7_0511200	19.6025622626848	-0.0880408313979244	0.513524933375562	-0.171444122136786	0.863874563875081	0.980271361584184
PF3D7_1238700	11.0706197924336	-0.103843130597668	0.593478158564122	-0.174973803330705	0.861100217927194	0.980271361584184
PF3D7_0411900	16.9276746734335	0.0942947342112637	0.523286121767568	0.180197276955775	0.85699769611689	0.980271361584184
PF3D7_1148000	10.4123747078343	0.114852668497882	0.612222412509797	0.18759958170601	0.8511905541724	0.980271361584184
PF3D7_1219000	23.0891163376147	-0.0816630180784337	0.482074691365595	-0.169399098399261	0.86548273263035	0.980271361584184
PF3D7_1130100	56.7635227672999	0.0726519827157375	0.396236374612252	0.183355157099934	0.854519358769094	0.980271361584184
PF3D7_1219600	16.8141571227451	-0.093446478931552	0.541696842460436	-0.172506966271226	0.863038985167828	0.980271361584184
PF3D7_1345200	8.7285085322726	-0.10120234630844	0.652605390612564	-0.155074333991399	0.876762715897646	0.981115453723733
PF3D7_1104700	15.0918412202931	0.0838444827474091	0.540455192861469	0.155136788127597	0.876713480528703	0.981115453723733
PF3D7_1403900	14.1972889549867	0.0852568569117264	0.561535768541376	0.151828007560741	0.8793225913751	0.983419972710343
PF3D7_1356600	8.90370636703749	0.100754518157245	0.666640965510741	0.151137603852551	0.879867169612408	0.983469276614552
PF3D7_1323200	17.8546847687122	0.0812003800688636	0.54564510730555	0.14881537281593	0.881699319962086	0.983873857629492
PF3D7_1439900	44.9827470058554	-0.0644679158283799	0.431617877333235	-0.149363405025522	0.881266886325136	0.983873857629492
PF3D7_1448400	8.96918907932418	0.0963580468973858	0.647676611664353	0.148774936692205	0.881731228135132	0.983873857629492
PF3D7_1108000	11.5259314594023	-0.0849859467799067	0.584644998557033	-0.145363334997582	0.884424011572466	0.986318491906865
PF3D7_1009500	9.12283090318692	0.0935538100984738	0.65152435981831	0.143592190665846	0.885822507693775	0.987317769494196
PF3D7_0915100	15.3421217525255	-0.0758733189087463	0.541567006886027	-0.140099596068477	0.888581299736464	0.989270398856743
PF3D7_1203800	8.57587012491987	0.091048927143075	0.649819631707125	0.140114152759409	0.888569798616428	0.989270398856743
PF3D7_0607000	30.5917823568243	0.0574670740655321	0.46570327858311	0.123398474325485	0.901791565153072	0.989860754911768
PF3D7_0922100	22.5367732282545	-0.0563281052552349	0.487076025522122	-0.115645407089897	0.9079335746534	0.989860754911768
PF3D7_1109700	8.81553145134029	0.067909122916622	0.702097574539909	0.0967231982835483	0.922946216638692	0.989860754911768
PF3D7_0108800	12.8965540531091	0.0599471241031845	0.61531652938059	0.0974248557299938	0.922389006598597	0.989860754911768
PF3D7_1348500	13.2138212758625	-0.0714793236372379	0.589462471030088	-0.121261873571574	0.9034836175999	0.989860754911768
PF3D7_1228300	8.48597961571006	0.0638163827211629	0.657810291147527	0.0970133541234774	0.922715789417328	0.989860754911768
PF3D7_1034500	8.22459204205191	0.0677834677337167	0.683967946632591	0.0991032811807015	0.921056266910002	0.989860754911768
PF3D7_1309100	86.6256597432122	0.0314174150247247	0.303338816421134	0.10357202350624	0.917508990239437	0.989860754911768
PF3D7_0314500	9.97165570112823	0.0717594683719833	0.642890601420614	0.111620030240626	0.911124689435367	0.989860754911768
PF3D7_0709100	10.3459161102508	0.068756835460656	0.618784241726581	0.111116009142064	0.911524353896702	0.989860754911768
PF3D7_0914400	8.85737814630838	0.0901504649560228	0.691723024253533	0.130327402435835	0.896307400947187	0.989860754911768
PF3D7_1352000	15.7467574022865	-0.056044671647668	0.558444803803188	-0.100358479953589	0.920059731491536	0.989860754911768
PF3D7_1413900	13.3173293499431	0.0678769110667037	0.57938526547881	0.117153326311482	0.90673855234996	0.989860754911768
PF3D7_1364100	22.1232497703152	0.0459203923379694	0.473520753529242	0.0969765147476974	0.922745045043584	0.989860754911768
PF3D7_0414200	9.69537867946134	-0.0686212017187913	0.614943233570387	-0.111589489846687	0.911148905858259	0.989860754911768
PF3D7_1468700	30.6892962957047	-0.0603087342255099	0.47490186711626	-0.126991992244044	0.898946736498765	0.989860754911768
PF3D7_0914700	20.0511842164323	-0.0506864698931804	0.503828019400811	-0.100602721447411	0.919865836266905	0.989860754911768
PF3D7_0422500	20.89413605068	0.0579128153535616	0.52872009341155	0.109533978517595	0.912778972932589	0.989860754911768
PF3D7_0316600	25.2070862601002	0.0471046816344177	0.455242881604635	0.103471539122992	0.917588736718594	0.989860754911768
PF3D7_0934500	10.0208886455782	-0.0793269233595802	0.612667627393196	-0.129477909086047	0.896979503797924	0.989860754911768
PF3D7_0212300	9.52346769201052	0.0744416765025794	0.635107011416327	0.117211233956574	0.90669266487426	0.989860754911768
PF3D7_0529900	22.9218580655446	0.0569055117622334	0.473056556860228	0.120293252333139	0.904250849157078	0.989860754911768
PF3D7_1358800	39.1546371364916	-0.0483542781313336	0.409621566944477	-0.118046221276938	0.906031034601557	0.989860754911768
PF3D7_1102400	15.1731651622734	0.0560756889497475	0.542346721085998	0.103394538529635	0.917649846538882	0.989860754911768
PF3D7_1336000	7.91270861664569	-0.0731097726930603	0.658058044812028	-0.111099276529541	0.911537622437158	0.989860754911768
PF3D7_1001600	126.055739586656	0.0280753615271231	0.29377313981083	0.095568170545482	0.923863545682485	0.989860754911768
PF3D7_0627300	22.7969122324816	-0.0519129371369088	0.47463594735545	-0.109374221287187	0.912905679497337	0.989860754911768
PF3D7_1031300	8.65982610648695	-0.0643384834171578	0.632527190265469	-0.101716549750462	0.918981665479553	0.989860754911768
PF3D7_1233200	9.16494018978591	-0.0851770261997317	0.65923802874323	-0.129205268030598	0.897195227867613	0.989860754911768
PF3D7_1119600	8.13898888203485	0.0660340151789832	0.669013119400185	0.0987036177081057	0.921373596379183	0.989860754911768
PF3D7_0613100	11.528257735403	-0.069024353648359	0.592340616659383	-0.116528145643017	0.907233981040868	0.989860754911768
PF3D7_1144200	30.4430550500683	-0.0465928029133585	0.438796316025434	-0.106183213513256	0.915436989320785	0.989860754911768
PF3D7_0207100	12.4160186295944	0.0818561905352236	0.612813036676651	0.13357449276722	0.893739055229362	0.989860754911768
PF3D7_0317500	10.986459541795	-0.0632426207906773	0.605975075808031	-0.104365052814007	0.916879655009304	0.989860754911768
PF3D7_1466900	11.1219403614861	0.0739281182686108	0.629508517353329	0.117437836392477	0.906513102395169	0.989860754911768
PF3D7_1028600	15.8757698848239	-0.062343942974826	0.559099329622527	-0.111507812067879	0.91121367110061	0.989860754911768
PF3D7_0520600	12.85020839367	0.0714914959709856	0.572030675864083	0.124978430331544	0.900540626538133	0.989860754911768
PF3D7_1229300	11.976430267158	0.0804847079950161	0.581385311577398	0.138436087724073	0.889895777700167	0.989860754911768
PF3D7_1369200	10.1309781100843	-0.065481130263897	0.648341646831587	-0.100997877560234	0.919552145023816	0.989860754911768
PF3D7_1110200	9.91699075210713	0.0683097082864331	0.65132219947917	0.104878519941524	0.916472203557789	0.989860754911768
PF3D7_0417200	9.92859593571917	0.0626893300114412	0.647640562440556	0.0967964850367061	0.922888015362319	0.989860754911768
PF3D7_0321700	8.4284428590407	0.0633906453119146	0.643505247617053	0.0985083580074208	0.921528635510669	0.989860754911768
PF3D7_0709400	12.3660981247237	0.0668747165952821	0.577463730387492	0.115807648300972	0.907804988836561	0.989860754911768
PF3D7_0218000	12.4415901502391	0.0781914242424799	0.586204487197498	0.133385918992695	0.893888180913834	0.989860754911768
PF3D7_1224300	109.701218745084	0.0364581245350864	0.290823368432533	0.125361743561347	0.900237173351577	0.989860754911768
PF3D7_0922700	10.7866251878328	0.0745546329565722	0.599093998172632	0.124445634881972	0.90096244273587	0.989860754911768
PF3D7_1211300	7.75794607763729	-0.0744726970660397	0.666555493371482	-0.111727677300133	0.91103933341107	0.989860754911768
PF3D7_0621300	8.1920086139532	0.0868204251407136	0.650419321968491	0.133483773018846	0.893810796680431	0.989860754911768
PF3D7_1326400	13.6091351728156	0.061944684817533	0.577991380612036	0.107172333178982	0.914652263915514	0.989860754911768
PF3D7_0924000	20.354240117567	0.0636484437985959	0.524448276749257	0.121362671249708	0.903403782310145	0.989860754911768
PF3D7_0416800	60.6893433052451	0.0463083681922782	0.349250565930902	0.132593538020036	0.894514843208138	0.989860754911768
PF3D7_0809250	9.23953157334833	0.0736093319215893	0.627682305009941	0.117271637792025	0.906644799686369	0.989860754911768
PF3D7_1431600	7.91205492558168	-0.0790963501258602	0.672714651312206	-0.117577861536944	0.906402147184867	0.989860754911768
PF3D7_1363100	8.33533519762199	0.0885396315253284	0.651127226376684	0.135979003701048	0.891837879397075	0.989860754911768
PF3D7_1311800	30.2476194689374	-0.0528463782306791	0.432163223810635	-0.12228337655551	0.902674596778608	0.989860754911768
PF3D7_1131200	10.3917947456082	0.0720246318478851	0.609246741538255	0.118219149873554	0.905894016951043	0.989860754911768
PF3D7_0612700	11.2825447460835	0.0610461948305278	0.606424771485324	0.100665734153647	0.91981581334114	0.989860754911768
PF3D7_0731600	47.3857752333582	-0.0494334781669136	0.373448222137334	-0.13237036685834	0.894691352219288	0.989860754911768
PF3D7_1121700	11.8409395183429	-0.0798404680344029	0.598473796324896	-0.133406789945837	0.893871675808552	0.989860754911768
PF3D7_1226300	21.8788695696104	0.0534908765139266	0.51045447860075	0.10479068899651	0.916541898474724	0.989860754911768
PF3D7_0105700	13.1847771942055	-0.0759542023796368	0.575156527006692	-0.132058315976919	0.894938166112369	0.989860754911768
PF3D7_0813400	26.2849777952318	-0.0491922365337175	0.460468956115416	-0.106830733929841	0.914923264842722	0.989860754911768
PF3D7_1212800	11.9831198170001	-0.0574418454281495	0.601107655238566	-0.0955599964957228	0.92387003791765	0.989860754911768
PF3D7_1038000	87.7484007639461	-0.031602556140824	0.299525312912593	-0.105508799351613	0.915972088090112	0.989860754911768
PF3D7_0411800	10.3786606354659	0.0819683717966845	0.624611477279157	0.131230972818084	0.89559259505776	0.989860754911768
PF3D7_0526500	10.7570802127374	-0.0822258658121217	0.616434539130796	-0.13338945271961	0.893885386379162	0.989860754911768
PF3D7_1325900	12.9071069366381	-0.0610125604873545	0.578417805020856	-0.105481816012138	0.915993498208592	0.989860754911768
PF3D7_1428000	10.9059679900842	0.0750833676581775	0.6345086727576	0.118333083347564	0.905803744823861	0.989860754911768
PF3D7_1034900	14.0150956434146	0.0723153859216102	0.554063025438278	0.130518339252844	0.896156345622923	0.989860754911768
PF3D7_0727900	11.5979435776987	0.0526996347237436	0.604032344311958	0.087246378807368	0.930475674920939	0.989886993885386
PF3D7_1368100	15.0856009290643	0.0489250366199589	0.542997733565538	0.0901017326512539	0.928206372365513	0.989886993885386
PF3D7_0803600	15.1264971452223	-0.0510570499794163	0.558711375506104	-0.0913835876943918	0.927187802301698	0.989886993885386
PF3D7_1012700	9.97647848946526	-0.0545611886957564	0.621534286929805	-0.0877846803356136	0.930047814075173	0.989886993885386
PF3D7_1329500	16.1593491001681	0.0460639688924713	0.529253349283142	0.0870357626548108	0.930643085467291	0.989886993885386
PF3D7_0107000	12.1365146899738	0.055840900700189	0.595522420093824	0.0937679234501219	0.925293512764801	0.989886993885386
PF3D7_1234900	13.6096706119599	-0.0524321550457916	0.587229694145283	-0.0892873020021696	0.928853585296704	0.989886993885386
PF3D7_0607400	9.50633455755156	-0.0540537514814563	0.623793881138925	-0.0866532249126343	0.930947157608241	0.989886993885386
PF3D7_1238600	8.07877041230087	-0.0568668940616256	0.649601441883384	-0.0875412066462659	0.930241332965822	0.989886993885386
PF3D7_0814000	67.8669299301453	0.0302480539964953	0.340777649167813	0.0887618482912882	0.929271178620361	0.989886993885386
PF3D7_1133900	12.1137794779874	0.0516944885919688	0.576666049483762	0.0896437177778132	0.928570342473614	0.989886993885386
PF3D7_0406500	16.7758344602352	0.0511875399395368	0.572495802914815	0.0894112055999706	0.928755118359562	0.989886993885386
PF3D7_1019000	33.9405961165362	-0.0385797269987417	0.40736864886944	-0.0947047032357817	0.924549382130086	0.989886993885386
PF3D7_0926400	10.4539146859323	-0.0567973556742646	0.621954810479348	-0.0913207112756154	0.927237761529698	0.989886993885386
PF3D7_1253000	13.1375053229476	0.0493742414841167	0.575526897666301	0.085789633263578	0.931633647552846	0.990081188448536
PF3D7_0916700	41.3979666516632	0.0327025078033037	0.385427956685867	0.0848472645432854	0.932382817317241	0.990341749204529
PF3D7_1223700	12.4018317562227	-0.0517925078430678	0.615160834440406	-0.0841934416877855	0.932902632450936	0.990358548225873
PF3D7_0207600	92.6002649280271	0.0274790536494617	0.329645225206532	0.0833594772448026	0.933565708798423	0.990527331419493
PF3D7_0111800	17.7396798338153	0.0425466185349102	0.51962059917252	0.0818801614152024	0.934742010356003	0.991240178278222
PF3D7_1118000	12.4040738130396	0.0459676605312879	0.584015908232864	0.0787096034256644	0.937263606752101	0.99230764400209
PF3D7_1142300	15.5552952756063	0.0445959206016545	0.566127552139316	0.0787736269558561	0.937212681485298	0.99230764400209
PF3D7_0608500	40.9103830317997	-0.0333179820325374	0.417179174883492	-0.0798649214497398	0.936344689306467	0.99230764400209
PF3D7_1123600	9.50547676079526	-0.049084687171827	0.629509533555135	-0.077972905183219	0.937849605889049	0.99239336325901
PF3D7_0505100	24.7351934918428	0.0361647645833099	0.473554792103533	0.0763687015448958	0.939125769415537	0.992674629855584
PF3D7_0624500	15.011722049263	-0.0429013268419	0.558762676307528	-0.0767791562697153	0.938799232669679	0.992674629855584
PF3D7_0717600	9.06854679771645	0.0502747859030181	0.677099914055906	0.0742501732157465	0.940811323543375	0.992854055189437
PF3D7_0303100	10.481362897206	-0.0456994461816076	0.605363050913833	-0.0754909737431472	0.939824078954553	0.992854055189437
PF3D7_0419500	8.73035981641488	0.0478412140256449	0.643022903952994	0.0744004820536566	0.940691725244725	0.992854055189437
PF3D7_0818400	8.44784266689847	-0.0468680352208257	0.640891474738793	-0.0731294408931366	0.94170311392926	0.993039991707279
PF3D7_0728000	21.2823435601573	0.0367319646322599	0.504847273047927	0.0727585679734331	0.941998241497388	0.993039991707279
PF3D7_1239700	28.147358817693	0.0316800966169475	0.451093310570382	0.0702295863729166	0.944010925936661	0.994263523479649
PF3D7_1117600	9.07011693485459	-0.0456142808693519	0.651366003136715	-0.0700286484859388	0.944170857411209	0.994263523479649
PF3D7_1008800	7.93603887037827	0.0408553996106411	0.647836538883364	0.0630643644785166	0.949715250816712	0.995301582855915
PF3D7_1470900	14.7593603939508	-0.0359698641194898	0.566439298839876	-0.0635017100564167	0.949366997566116	0.995301582855915
PF3D7_1309000	8.06004173421704	0.0442678854002753	0.686872084367585	0.064448514370814	0.948613101408058	0.995301582855915
PF3D7_0217400	7.75815034670882	0.0415024842334071	0.651233579786251	0.0637290298313996	0.949185989261128	0.995301582855915
PF3D7_1025000	17.4009175056364	-0.0358197688906848	0.535309838616496	-0.0669140865844362	0.946650098700799	0.995301582855915
PF3D7_1217500	69.4359695383017	0.0227843453414524	0.34248637835736	0.0665262818647886	0.946958834151215	0.995301582855915
PF3D7_0621900	14.8477824239162	-0.0359222095914322	0.565348353481787	-0.0635399561530508	0.949336543098429	0.995301582855915
PF3D7_0811200	18.222975151202	-0.032862405250511	0.516378583887511	-0.0636401397654978	0.949256769593836	0.995301582855915
PF3D7_0925800	9.14175375783902	-0.0437888129048386	0.643238751291275	-0.0680755206631042	0.945725516821995	0.995301582855915
PF3D7_1107400	7.81459946768439	-0.0392875750911903	0.651439751025776	-0.06030883904356	0.951909662223322	0.997069555580398
PF3D7_1459700	15.182648175577	0.0326194082513889	0.556804334500575	0.0585832512971488	0.953284051297355	0.997740750608628
PF3D7_1412300	47.497543947703	0.0210297603942646	0.361761332351676	0.0581315870813443	0.953643814074929	0.997740750608628
PF3D7_1322200	26.2658332327983	-0.0267971169321436	0.465293395347655	-0.0575918704199993	0.954073725391151	0.997740750608628
PF3D7_1455700	13.2911901553862	0.0235474223205946	0.59356577537541	0.0396711254211071	0.968355322123926	0.997891758389575
PF3D7_1445600	10.7828129938777	0.0344390772119297	0.607668351473773	0.0566741333959633	0.954804779447722	0.997891758389575
PF3D7_0903700	42.1495236667528	-0.0128537754694094	0.38774444470466	-0.0331501215425536	0.973554873480753	0.997891758389575
PF3D7_1451200	49.639632062193	-0.00982699775308331	0.362131488035561	-0.0271365459170408	0.978350826058744	0.997891758389575
PF3D7_1340900	21.7081120499986	-0.0108065017886669	0.489117831233164	-0.0220938618439274	0.982373082821382	0.997891758389575
PF3D7_0614900	13.7593886548498	-0.0267715824991913	0.558910241455263	-0.0478996098362498	0.961796250341028	0.997891758389575
PF3D7_0526300	8.69563677929781	0.0316185738287576	0.636384868777428	0.0496846725622196	0.960373670897054	0.997891758389575
PF3D7_0519500	14.0295369723057	-0.0126719155227643	0.562749756718441	-0.022517851623176	0.98203487207417	0.997891758389575
PF3D7_0802000	47.7205468367112	-0.00940894515892481	0.386994111502791	-0.0243128897294784	0.980603031653523	0.997891758389575
PF3D7_0527900	7.76504416562235	-0.0290007138434168	0.648264058402871	-0.0447359582372435	0.964317771849201	0.997891758389575
PF3D7_1445100	9.47220656218068	0.0177367395496387	0.674139643049433	0.0263101862240404	0.979009930292903	0.997891758389575
PF3D7_1315000	12.113618380871	0.0325103703520502	0.593089489590923	0.0548152866011399	0.956285621766434	0.997891758389575
PF3D7_1115700	20.7150929425082	-0.0238592084245668	0.499676077089001	-0.0477493510667252	0.961916002467518	0.997891758389575
PF3D7_0914500	11.4919546320238	-0.028788837237118	0.601815990388018	-0.0478366106865266	0.961846458834198	0.997891758389575
PF3D7_0214800	11.4836353424417	-0.0222273460928929	0.598272294616578	-0.0371525579454385	0.970363365747551	0.997891758389575
PF3D7_1338000	12.8882427313038	-0.0224211429139549	0.567141135813148	-0.0395336213477237	0.968464948501171	0.997891758389575
PF3D7_0730500	19.6871903273099	0.0129281635662516	0.50181164090506	0.0257629805935441	0.979446389247977	0.997891758389575
PF3D7_1208100	12.6195628930923	-0.014802456252228	0.592933794938374	-0.0249647707359411	0.980083063725119	0.997891758389575
PF3D7_0715600	10.5701326912701	-0.0270801193927839	0.613159077767618	-0.0441649163727247	0.964772947430725	0.997891758389575
PF3D7_1422000	8.81838340074049	-0.0136267566247436	0.638425392722705	-0.0213443211690395	0.982970988701181	0.997891758389575
PF3D7_1321800	9.75268576057245	-0.0315556679804411	0.6277275885052	-0.0502696847458691	0.959907481283361	0.997891758389575
PF3D7_0812600	12.6713008127486	-0.0275818794071748	0.568026702603239	-0.0485573640830059	0.96127204839027	0.997891758389575
PF3D7_0803200	13.9256389154553	0.0328965173446468	0.627372967372793	0.0524353439747417	0.958181812422258	0.997891758389575
PF3D7_0500800	227.131322171066	0.00724804201766524	0.321835574046368	0.0225209473475452	0.982032402669717	0.997891758389575
PF3D7_0723400	12.1103324868411	0.0310918588944928	0.581764261208917	0.0534440854614949	0.95737808026292	0.997891758389575
PF3D7_0416000	19.9712520440985	0.0172220971167873	0.534487697360572	0.0322216904183841	0.974295258706157	0.997891758389575
PF3D7_0923800	13.3684134151561	-0.0225413166385188	0.593783039727488	-0.0379622103198904	0.969717812091719	0.997891758389575
PF3D7_1311900	45.1936536921582	0.0139781760323974	0.422383870528625	0.0330935364906414	0.973599997061713	0.997891758389575
PF3D7_0404600	19.861003738635	-0.0111232340650487	0.522871172226816	-0.0212733741232602	0.98302758340328	0.997891758389575
PF3D7_1438400	12.0055922739763	0.0332858989923347	0.604326035217904	0.0550793728096337	0.956075229307826	0.997891758389575
PF3D7_1202600	30.7862599495592	0.018813208174787	0.433403820235888	0.0434080349465945	0.965376272778892	0.997891758389575
PF3D7_1426200	12.8550056121411	-0.0195850414333959	0.592618585739333	-0.0330483078065502	0.973636064601778	0.997891758389575
PF3D7_0106100	16.3484362306538	0.0203351046175279	0.526551824536492	0.0386193792708407	0.969193851393816	0.997891758389575
PF3D7_0311300	32.1973192449282	0.0135970103347338	0.436040555685825	0.031182902960363	0.975123674745213	0.997891758389575
PF3D7_0704000	10.0466311924633	-0.0245857256156791	0.652948958221226	-0.0376533652533207	0.9699640587421	0.997891758389575
PF3D7_0909800	11.3496725120937	-0.0275854499096808	0.630624252191198	-0.0437430844339256	0.96510919565445	0.997891758389575
PF3D7_0509800	16.8342777338547	-0.0240275906308198	0.523256801224088	-0.0459193087879803	0.963374564222135	0.997891758389575
PF3D7_1468100	80.9099592721226	0.00793760602477362	0.305289312165054	0.0260002748490657	0.97925711922827	0.997891758389575
PF3D7_0321600	12.1670015176301	0.0127782069586494	0.605556094431797	0.0211016073921928	0.983164602667795	0.997891758389575
PF3D7_0204300	8.92524578391363	0.0195296632530558	0.671032474094695	0.0291039018333706	0.976781723904511	0.997891758389575
PF3D7_1214100	8.89711831170997	0.030485577755824	0.629105025605188	0.0484586460368797	0.961350721380826	0.997891758389575
PF3D7_1248500	81.8355931070642	0.0158177335457619	0.324672915543175	0.0487189808219727	0.961143249327914	0.997891758389575
PF3D7_1303800	75.884393065576	0.0130886880974869	0.313058373567631	0.0418090976079876	0.966650882513542	0.997891758389575
PF3D7_1238800	23.3649695071551	0.0246808072387122	0.473581813360394	0.0521151922274731	0.958436907769207	0.997891758389575
PF3D7_1228700	14.1113023685017	-0.021965456308321	0.57951925288373	-0.0379028931291227	0.969765106324846	0.997891758389575
PF3D7_1332600	8.31927976973279	-0.0189958425865825	0.650766800593508	-0.0291899380381084	0.976713106098179	0.997891758389575
PF3D7_1235600	9.85668626522136	0.0261043447993472	0.610911456860221	0.0427301608215214	0.965916636661402	0.997891758389575
PF3D7_1340800	8.76813139903854	0.020688375327535	0.632849472263448	0.0326908312865317	0.973921135558274	0.997891758389575
PF3D7_1330800	20.7549785642843	-0.0164354324486717	0.521963412753601	-0.03148770976488	0.974880593473025	0.997891758389575
PF3D7_0807800	19.3711203659208	0.0177370022258554	0.498830193965689	0.0355571944930732	0.971635440566395	0.997891758389575
PF3D7_0322700	19.6715532033086	0.0150561745473353	0.586737656789051	0.0256608287760682	0.979527867668736	0.997891758389575
PF3D7_1414100	15.390599511397	-0.0291419830601646	0.533385662389672	-0.0546358575324332	0.956428571230738	0.997891758389575
PF3D7_1433500	22.4912425203751	0.0131759172194028	0.508807540151688	0.025895679956855	0.97934054578769	0.997891758389575
PF3D7_1462800	498.309826983239	0.00558559140425281	0.19726866951358	0.0283146402215091	0.977411204073478	0.997891758389575
PF3D7_1406200	28.6781385699445	-0.00992095639709299	0.434778350494067	-0.0228184231938392	0.981795112266961	0.997891758389575
PF3D7_1353000	13.8181816539152	0.0181350024584313	0.559261954713738	0.0324266693015329	0.974131794640526	0.997891758389575
PF3D7_0531000	8.62719966981235	-0.0209987937556506	0.648005525606275	-0.0324052695939653	0.974148860168258	0.997891758389575
PF3D7_0717500	13.955691961861	0.0100903943570808	0.558827748193665	0.0180563588506415	0.985593892861892	0.998294845089494
PF3D7_0110500	12.576189069562	0.0111563692768536	0.579524340493291	0.0192509071618239	0.984640947070905	0.998294845089494
PF3D7_0910100	27.6909850848965	-0.00886594646687576	0.470468354042852	-0.0188449369456808	0.984964805679229	0.998294845089494
PF3D7_1433900	9.95432839010101	-0.0113206059260784	0.608532206093569	-0.0186031335937834	0.985157703023133	0.998294845089494
PF3D7_0419900	50.7297415881512	0.00588111948811388	0.352389650435331	0.0166892514602757	0.98668452206051	0.99838569689183
PF3D7_1118100	11.2046577027463	-0.00994612447491453	0.596642623734321	-0.0166701540910082	0.986699757437117	0.99838569689183
PF3D7_0526400	8.44863188521292	0.00592953314690758	0.660144139734461	0.0089821794817306	0.992833354036256	0.998422487554372
PF3D7_0807200	9.87067817211995	0.00780086297270394	0.63322707021298	0.0123192190284604	0.990170933951688	0.998422487554372
PF3D7_0723900	13.3606873693523	0.00791720298725402	0.568461039996134	0.0139274328937439	0.988887875566361	0.998422487554372
PF3D7_0313100	14.911235484569	-0.005284537585123	0.579228062651113	-0.00912341429200753	0.992720669579299	0.998422487554372
PF3D7_0208500	8.48599525645199	0.00957866574833213	0.681288756993863	0.0140596269203051	0.988782410320163	0.998422487554372
PF3D7_0914800	40.2732789184368	-0.00571328584914309	0.384359846636252	-0.0148644191091844	0.988140346222726	0.998422487554372
PF3D7_0526900	11.3469223839664	0.00551836610757599	0.604745967505726	0.00912509781642114	0.992719326377075	0.998422487554372
PF3D7_0109400	11.9958300750158	-0.00571876206822983	0.595062253844185	-0.00961035930490605	0.992332160719365	0.998422487554372
PF3D7_1232100	21.8881815566736	0.0048339473349441	0.521737815253082	0.00926508908042111	0.992607634230844	0.998422487554372
PF3D7_0801000	19.0728701461272	0.00498875150762192	0.523601807879927	0.00952775837008942	0.992398063712609	0.998422487554372
PF3D7_0802100	19.7699827485347	0.00645278963510311	0.50652884511024	0.0127392342951342	0.989835836560651	0.998422487554372
PF3D7_1129700	13.9636634873443	-0.00882076843428937	0.555175443329871	-0.0158882539569538	0.987323540805614	0.998422487554372
PF3D7_0715200	13.9354104170143	-0.00477171229556791	0.641754943522384	-0.00743541182460945	0.994067454365793	0.999152198377894
PF3D7_1304000	8.69304758490774	-0.000732204579665184	0.666549967860619	-0.00109849915980837	0.999123524656608	0.999689231102326
PF3D7_0609800	20.0549807696455	0.00243841661954633	0.525445453332868	0.00464066556115313	0.996297297887005	0.999689231102326
PF3D7_0830700	12.4195672786345	-0.00110288304716361	0.576674836065362	-0.00191248686120684	0.998474057190921	0.999689231102326
PF3D7_1355100	16.1300083941443	0.00109931291696228	0.530083526386499	0.00207384848281577	0.998345309500212	0.999689231102326
PF3D7_1368200	15.0648598697218	0.00265085082289638	0.541817563029529	0.00489251549557449	0.996096352996008	0.999689231102326
PF3D7_0923500	8.06973698436898	-0.000387247489817556	0.690713815060692	-0.00056064824732589	0.999552667442852	0.999689231102326
PF3D7_1249800	20.5796029835979	-0.000190065075618209	0.487983149808089	-0.0003894910627405	0.999689231102326	0.999689231102326
PF3D7_0501800	8.138607875105	0.00262647701937034	0.684506629850254	0.00383703664045579	0.996938495217693	0.999689231102326
PF3D7_0803800	18.0410116785674	0.00194782289343421	0.509163892026443	0.00382553225776084	0.996947674319658	0.999689231102326
PF3D7_1457000	28.5090107900728	-0.000972702664867398	0.43574162208013	-0.00223229229336399	0.998218889923176	0.999689231102326
PF3D7_1314600	1.66245398644523	0.392239891194549	0.716405521947875	0.547510982506202	0.584027727389329	NA
PF3D7_0209400	3.62103310774429	-0.334416753155359	0.746525876164624	-0.44796404764088	0.654179143695341	NA
PF3D7_1142200	0.703963576124377	0.227806072381528	0.611238768271831	0.372695719261409	0.709374922827005	NA
PF3D7_0806000	5.21138229383937	-0.562471687137285	0.727029787596317	-0.773657003789228	0.439133652612803	NA
PF3D7_0412000	6.09944220910343	1.18944411100226	0.697558055082299	1.70515429122517	0.0881656523122302	NA
PF3D7_0732200	0.889296998593572	-0.605302214390128	0.58769319813086	-1.0299629403833	0.303027402712964	NA
PF3D7_0324800	1.17549081481462	-0.303213749028715	0.645089284979021	-0.470033770656377	0.638330890289179	NA
PF3D7_0301800	1.52037501892333	-0.67732728411061	0.672195250019841	-1.00763473721455	0.313629846218408	NA
PF3D7_0726100	2.83472653238765	-0.870415583875691	0.748131324069923	-1.16345293382521	0.244645783539822	NA
PF3D7_1342200	2.78445007748305	0.329342545861329	0.748234511206643	0.440159523422962	0.659821573384373	NA
PF3D7_1322800	2.95593721280736	0.174840985933037	0.745557077139216	0.234510530842148	0.814588658679804	NA
PF3D7_1477400	1.08333363220599	0.238916519359549	0.674787026752736	0.354062111284626	0.72329233601294	NA
PF3D7_1106700	3.12870616039371	0.0831597292693182	0.745959253542526	0.11148025696363	0.91123552066485	NA
PF3D7_0621100	6.71866621119631	-0.906190185509677	0.67583138930801	-1.34085246682243	0.179968357611858	NA
PF3D7_1040800	0.34786417117344	-0.236598633062809	0.448138286363535	-0.527958981105395	0.597527806212261	NA
PF3D7_0909100	3.82922274537171	0.180813783309297	0.740533471651322	0.244166928614447	0.807101539149588	NA
PF3D7_1028500	4.54507281549149	0.822342645967896	0.740293851505876	1.11083273796631	0.266640351938043	NA
PF3D7_1419100	6.11873828912009	0.139941855749027	0.687525976541826	0.203544099457765	0.838709780639224	NA
PF3D7_1468000	3.1616209219444	-0.258953852445083	0.746824258116715	-0.346740012299672	0.728786647429796	NA
PF3D7_0500900	1.36811857178453	1.05872286723035	0.682390639647193	1.5514908993736	0.12078408659848	NA
PF3D7_1207600	3.07560125600749	-0.475741140360752	0.748211896574433	-0.635837444631468	0.524882378782084	NA
PF3D7_0311400	2.36460817033992	-1.04277165171964	0.739528984064053	-1.41004838781184	0.158525395585876	NA
PF3D7_0319500	3.17061245796371	0.577949802964835	0.747453054620029	0.77322555495962	0.43938890475618	NA
PF3D7_1222800	1.12964621219317	0.458348721706163	0.678526333152896	0.675506165805477	0.499354235354771	NA
PF3D7_1469700	5.09280537336305	0.864026429020763	0.72455709642711	1.19248908509957	0.233069528020048	NA
PF3D7_1132100	0.444648499296786	-0.333880296623863	0.482471570881138	-0.692020663547279	0.488924352482449	NA
PF3D7_0532200	4.81448928390822	-0.277860537792249	0.712947843908739	-0.389734733285506	0.696732709968531	NA
PF3D7_1227400	6.64297949614267	0.0501281508867349	0.678564454714491	0.0738738236853661	0.941110784595267	NA
PF3D7_1242500	3.60797715557716	0.941781865399123	0.745001677664786	1.26413388537747	0.206181976089706	NA
PF3D7_0911100	5.69769065774265	-0.967730020903051	0.702938327858853	-1.3766926379598	0.168607295846246	NA
PF3D7_0926300	3.41782034107759	-0.243471992778792	0.742167748121921	-0.328055205032697	0.742869922547809	NA
PF3D7_1436400	2.58835087616411	0.196872885896197	0.739029275434009	0.266393893233228	0.789935867858878	NA
PF3D7_0808700	0.862418259200112	-0.325003228846392	0.636682196336786	-0.510463824363757	0.609726552421497	NA
PF3D7_1409000	3.82646475806782	1.60012060531606	0.746657019053551	2.14304635794403	0.0321093761238117	NA
[truncated: 3,428 more rows]
