# Supplementary material for: Differential Gene Expression of Malaria Parasite in Response to Red Blood Cell-Specific Glycolytic Intermediate 2,3-Diphosphoglycerate (2,3-DPG)
Source: Preprints.org preprint supplement (doi:10.20944/preprints202311.0790.v1), 2023-11-13
Supplement: Supplementary file 3 [file ijms_Balau et al_Table S3.xlsx]

## Sheet: DEG ordered by p-adj
GeneID	Name	log2(FC)	P-adj	Chromosome	Molecular Function	Biological Process	Cellular Component	GO enrichment	Malaria Parasite Metabolic Pathways/PlasmoDB
									Pathway	Activity	References
PF3D7_1251200	coronin	-2.87705299398017	0.000134816339164722	12	actin binding (GO:0003779), actin filament binding (GO:0051015), protein binding (GO:0005515), binding (GO:0005488)	actin filament organization (GO:0007015), microtubule-based process (GO:0007017), response to xenobiotic stimulus (GO:0009410), cell motility (GO:0048870)	nucleus (GO:0005634), pellicle (GO:0020039)	GO:0020039; GO:0005488	protein kinase G-dependent phosphorylation in schizonts, potential pKG substrates in schizonts, PfWDR genes, actin and filaments, artemisinin - effect of drug on gene transcription, cGMP/PKG signalling in egress/invasion, nuclear proteome, phosphoproteome, phosphoproteome of the merozoite, protein-protein associations involving proteases, transcripts translationally regulated in asexual blood sta…	coronin	doi:10.1016/S0014-5793(98)01557-9; doi:10.1186/s12936-015-0801-5; doi:10.1073/pnas.1812317115; doi:10.1371/journal.ppat.1005710; doi:10.1038/nature01097
PF3D7_0831800	histidine-rich protein II	-2.15282545321613	0.000139856876174645	8		heme catabolic process (GO:0042167)	cytoplasm (GO:0005737), food vacuole (GO:0020020), Maurer´s cleft (GO:0020036), host cell cytoplasm (GO:0030430), host cell membrane (GO:0033644), host cell part (GO:0033643)	GO:0033643	cloroquine - effect of drug on gene transcription, exportome, hemoglobin digestion, properties of proteins exported to erythrocyte, subcellular localization of exported proteins, candidate genes related to virulence	histidine-rich protein II	doi:10.1086/432010; doi:10.1371/journal.pone.0008091; doi:10.1016/j.actatropica.2012.09.015 ; doi:10.1186/s12936-020-03328-z ; doi:10.1073/pnas.83.16.6065 ; doi:10.1126/science.271.5246.219 ; doi:10.1128/mbio.00617-16 ;doi:10.1186/s13104-019-4361-6 ; doi:10.1186/1475-2875-13-34 ; doi:10.1371/journal.pone.0112087 ; doi:10.1371/journal.pone.0126805 ; doi:10.1038/s41598-018-35471-8 ; doi:10.1038/sre…
PF3D7_1302100	gamete antigen 27/25	1.86038840076485	0.000154202969992435	13	protein dimerization activity (GO:0046983)		nucleus (GO:0005634)		differential proteome analysis under drug treatment, highest expressed genes based on mRNA abundance, nuclear proteome, phosphoproteome, proteins with ATPase activity, transcripts translationally regulated in asexual blood stages	gamete antigen 27/25	doi:10.1111/j.1365-2958.2009.06762.x; doi:10.1016/0166-6851(91)90201-g; doi:10.1016/0166-6851(96)02663-1; doi:10.1016/j.ijpara.2009.11.006; doi:10.1038/nsb899
PF3D7_0501600	rhoptry-associated protein 2	-1.84634420276389	0.000296120738252012	5	RNA binding (GO:0003723), protein binding (GO:0005515), binding (GO:0005488)	entry into host (GO:0044409)	nucleus (GO:0005634), rhoptry (GO:0020008), food vacuole (GO:0020020), extracellular vesicle (GO:1903561)	GO:0020008; GO:1903561; GO:0044409; GO:0005488	proteins of detergent-resistant membranes, food vacuole proteome, functional annotation of merozoite invasion-related proteins, top ranked surface exposed proteins, components of exosomes, exportome, S-glutathionylated proteins, highest expressed genes based on mRNA abundance, location of lipid raft-associated proteins, peptides with confirmed methylated lysine residues, proteins of erythrocyte-d…	rhoptry-associated protein 2	doi:10.1182/blood-2017-08-802918 ; doi:10.1093/emboj/19.11.2435 ; doi:10.1016/0166-6851(96)02730-2 ; doi:10.1016/0166-6851(92)90251-E
PF3D7_1342600	myosin A	-2.16476561885265	0.00067636711617308	13	microfilament motor activity (GO:0000146), cytoskeletal motor activity (GO:0003774), actin binding (GO:0003779), protein binding (GO:0005515), ATP binding (GO:0005524), actin-dependent ATPase activity (GO:0030898), actin filament binding (GO:0051015), binding (GO:0005488)	actin filament organization (GO:0007015), vesicle transport along actin filament (GO:0030050), entry into host (GO:0044409), cell motility (GO:0048870)	nucleus (GO:0005634), cytoplasm (GO:0005737), cytosol (GO:0005829), plama membrane (GO:0005886), cell surface (GO:0009986), actin cytoskeleton (GO:0015629), myosin complex (GO:0016459), pellicle (GO:0020039), vesicle, perinuclear region of cytoplasm (GO:0048471), inner membrane pellicle complex (GO:0070258), cell periphery (GO:0071944)	GO:0016459; GO:0020039; GO:0070258; GO:0009986; GO:0044409; GO:0005488	lysine acetylaated proteins, O-glcNAcylated proteins identified by mass spectrometry, protein kinase G-dependent phosphorylation in schizonts, potential PKG substrates in schizonts, differentially expressed genes in different stages treated with cAMP, cGMP/PKG signalling in egress/invasion, functional orthologs of known cell cycle proteins in E. coli, network analysis of drCDC-UNK proteins and th…	myosin A	doi:10.1073/pnas.0510907103 ; doi:10.1242/jcs.111.13.1831 ; doi:10.1371/journal.ppat.1009007 ; doi:10.1091/mbc.11.4.1385 ; doi:10.1039/C9MO00124G ; doi:10.1074/jbc.M112.379842 ; doi:10.1038/s41467-019-11120-0 ; doi:10.1038/nature04104 ; doi:10.1074/jbc.M509807200 ; doi:10.1016/j.jmb.2005.11.027 ; doi:10.7554/eLife.60581 ; doi:10.1074/jbc.M117.802769
PF3D7_0302500	cytoadherence linked asexual protein 3.1	-1.46040101611165	0.000822402083907639	3	RNA binding (GO:0003723), anion channel activity (GO:0005253), protein binding (GO:000515), cell adhesion molecule binding (GO:0050839), binding (GO:0005488)	cytoadherence to microvasculature mediated by symbiont protein (GO:0020035)	nucleus (GO:0005634), host cell plasma membrane (GO:0020002), rhoptry (GO:0020008), host cell cytoplasm (GO:0030430), extracellular vesicle (GO:1903561), host cell part (GO:0033643)	GO:0020008; GO:1903561; GO:0033643; GO:0005488; GO:0005253	proteins of detergent-resistant membranes, parasite proteins co-exported with Hsp70x, established and putative Maurer's clefts proteins, possible reasons for increased permeability of host cell membrane, functional annotation of merozoite invasion-related proteins, chaperones associate with proteins in various iRBC locations, functional orthologs of known cell cycle proteins in E. coli, Interacti…	cytoadherence linked asexual protein 3.1	doi:10.1016/S0166-6851(01)00378-4 ; doi:10.1371/journal.pone.0157390 ; doi:10.1128/mbio.01354-20 ; doi:10.1073/pnas.040561197 ; doi:10.1371/journal.ppat.1008363 ; doi:10.1016/j.molbiopara.2005.05.003 ; https://doi.org/10.1038/nature04104 ; doi:0.1128/mbio.02293-17 ; doi:10.1038/22964 ; doi:10.1016/j.parint.2006.11.001 ; doi:10.1111/j.1365-2958.2011.07572.x ; doi:10.1016/j.molbiopara.2007.11.004 ;…
PF3D7_0801100	28S ribosomal RNA	-1.1396288370774	0.000886452413073052	8					P. falciparum genes harboring G-quadruplexes, structure and processing of pre rRNA	28S ribosomal RNA	doi:10.1261/rna.751807
PF3D7_1148620	5.8S ribosomal RNA	-1.55554770203662	0.00124283004819218	11							doi:10.1261/rna.751807
PF3D7_1035900	merozoites-associated armadillo repeats protein	-2.22461074019446	0.00127486721402407	10	RNA binding (GO:0003723)	entry into host (GO:0044409)	cell surface (GO:0009986), apical part of cell (GO:0045177)	GO:0009986; GO:0044409	food vacuole proteome, tafenoquine - effect of drug on gene transcription, chloroquine - effect of drug on gene transcription	probable protein, unknown function	doi:10.1038/nature04104 ; doi:10.3389/fimmu.2020.00505
PF3D7_1371200	5.8S ribosomal RNA	-1.54553804535594	0.00146513045581033	13					doxycycline - effect of drug on gene transcription, structure and processing of pre rRNA	5.8S	doi:10.1261/rna.751807
PF3D7_1125800	kelch domain-containing protein, putative	-2.81673705321592	0.00150640016306072	11	protein binding (GO:0005515)				lysine acetylated proteins, functional orthologs of known cell cycle proteins in E. coli, effect of hyperoxia on gene expression, phosphoproteome, phosphoproteome of the merozoite, transcripts translationally regulated in asexual blood stages	kelch domain-containing protein, putative	doi:10.1038/nature04104; doi:10.1038/nature01097
PF3D7_1239200	AP2 domain transcription factor, putative	1.50312334402859	0.00293009088451186	12	DNA binding (GO:0003677), DNA-binding transcription factor activity (GO:0003700), binding (GO:0005488)	regulation of DNA-templated transcription (GO:0006355)	heterochromatin (GO:0000792), nucleus (GO:0005634)	GO:0005488	lysine acetylated proteins, DNA binding proteins with AP2 domain(s), P. falciparum genes harboring G-quadruplexes, proteins predicted to be involved in cell cycle regulatory network, functional orthologs of known cell cycle proteins in E. coli, S-nitrosylated proteins, nuclear proteome, phosphoproteome, transcription associated proteins implicated in the transcriptional machinery, transcription r…	transcription factor with AP2 domain(s)	doi: 10.1073/pnas.0801993105; doi:10.1038/nature04104; doi:10.1371/journal.ppat.1001165; doi:10.1093/nar/gkac176
PF3D7_1016900	early transcribed membrane protein 10.3	1.47884285180955	0.00322364476437871	10			symbiont-containing vacuole membrane (GO:0020005), host cell part (GO:0033643)	GO:0033643	established and putative Maurer's clefts proteins, proteins of the parasitophorous vacuolar membrane, candidate genes related to virulence	early transcribed membrane protein 10.3	doi: 10.1128/EC.00336-09; doi:10.1111/j.1365-2958.2005.04983.x; doi:10.1091/mbc.e02-04-0240; doi:10.1073/pnas.0408442102
PF3D7_1126700	conserved Plasmodium protein, unknown function	-2.40590410526714	0.00329871465902893	11	microtubule binding (GO:0008017), dynein light intermediate chain binding (GO:0051959)	cytoskeleton-dependent intracellular transport (GO:0030705), cytoplasmic microtubule organization (GO:0031122)	cytoplasm (GO:0005737), centrosome (GO:0005813)		the ATG autophagic pathway, important interacting proteins, potential PKG substrates in schizonts, peptides with confirmed methylated lysine residues	autophagy-related protein 23	doi:10.1038/nature04104; doi:10.1038/nature01097
PF3D7_MIT01400	cytochrome c oxidase subunit 3	-1.55754571578524	0.00386090353317471	Mitochondrial	cytochrome-c oxidase activity (GO:0004129), obsolete heme-copper terminal oxidase activity (GO:0015002)	aerobic electron transport chain (GO:0019646), respiratory electron transport chain (GO:0022904)	mitochondrion (GO:0005739), membrane (GO:0016020), integral component of membrane (GO:0016021)
PF3D7_0613900	myosin E, putative	-2.05077629176199	0.00572763883298416	6	microfilament motor activity (GO:0000146), cytoskeletal motor activity (GO:0003774), actin binding (GO:0003779), ATP binding (GO:0005524), actin-dependent ATPase activity (GO:0030898), actin filament binding (GO:0051015), binding (GO:0005488)	actin filament organization (GO:0007015), vesicle transport along actin filament (GO:0030050), cell motility (GO:0048870)	nucleus (GO:0005634), cytoplasm (GO:0005737), cytosol (GO:0005829), actin cytoskeleton (GO:0015629), myosin complex (GO:0016459), vesicle (GO:0031982), basal part of cell (GO:0045178)	GO:0016459; GO:0005488	lysine acetylated proteins, protein kinase G-dependent phosphorylation in schizonts, P. falciparum genes harboring G-quadruplexes, network analysis of drCDC-UNK proteins and their potential protein interactions, molecular motor prototypes, nuclear proteome, total palmitome of Plasmodium falciparum, phosphoproteome of the merozoite, phosphoproteome, genes differentially expressed in severe malaria…	myosin E, putative	doi:10.1002/cm.20055 ; doi:10.1038/nature04104 ; doi:10.1111/cmi.13082
PF3D7_0707300	rhoptry-associated membrane antigen	-1.38260365791617	0.00572763883298416	7	protein binding (GO:0005515), binding (GO:0005488)	cellular protein localization (GO:0034613), entry into host (GO:0044409), cell-cell adhesion (GO:0098609)	nucleus (GO:0005634), endoplasmic reticulum (GO:0005783), Golgi apparatus (GO:0005794), symbiont-containing vacuole (GO:0020003), rhoptry (GO:0020008), anchored component of membrane (GO:0031225), rhoptry membrane (GO:0033016), membrane raft (GO:0045121), protein binding (GO:0005515), host cell part (GO:0033643)	GO:0033643; GO:0020008; GO:0044409; GO:0005488	lysine acetylated proteins, proteins of detergent-resistant membranes, genes coding for GPI-anchored membrane proteins, functional annotation of merozoite invasion-related proteins, exportome, Location of lipid raft-associated proteins, merozoite protein complexes, S-nitrosylated proteins, nuclear proteome, total palmitome of Plasmodium falciparum, phosphoproteome, phosphoproteome of the merozoit…	rhoptry-associated membrane antigen	doi:10.1128/IAI.72.6.3325-3330.2004 ; doi:10.1016/j.molbiopara.2004.05.018 ; doi:10.1074/jbc.M307859200 ; doi:10.1371/journal.ppat.1008049 ; doi:10.3389/fcimb.2020.605367
PF3D7_1026600	conserved Plasmodium protein, unknown function	-2.13491920250539	0.00572763883298416	10			nucleus (GO:0005634)		protein-protein associations involving proteases, candidate genes related to virulence	conserved Plasmodium protein, unknown function	doi:10.1038/nature04104; doi:10.1038/nature01097
PF3D7_MIT02300	cytochrome b	-1.88808645942064	0.00575607107124129	Mitochondrial	electron transfer activity (GO:0009055), oxidoreductase activity (GO:0016491), metal ion binding (GO:0046872)	response to xenobiotic stimulus (GO:0009410), respiratory electron transport chain (GO:0022904)	mitochondrial inner membrane (GO:0005743), membrane (GO:0016020), integral component of membrane (GO:0016021), respirasome (GO:0070469)				doi:10.1186/s12936-020-3126-y ; doi:10.1128/AAC.44.8.2100-2108.2000
PF3D7_MIT02100	cytochrome c oxidase subunit 1	-1.2438272679527	0.00666809837105726	Mitochondrial	cytochrome-c oxidase activity (GO:0004129), heme binding (GO:0020037), metal ion binding (GO:0046872)	oxidative phosphorylation (GO:0006119), aerobic respiration (GO:0009060), oxidation-reduction process (GO:0055114)	mitochondrial inner membrane (GO:0005743), integral component of membrane (GO:0016021), respirasome (GO:0070469)
PF3D7_1332200	conserved Plasmodium protein, unknown function	-2.08993748728037	0.00747101888398547	13			nucleus (GO:0005634), apical complex (GO:0020007)		domains binding modified histones	conserved Plasmodium protein, unknown function	doi:10.1038/nature04104
PF3D7_0818100	C3H1-type zinc finger protein CZIF2	-2.31780737624744	0.0076198343488173	8	metal ion binding (GO:0046872)		cytosol (GO:0005829), membrane (GO:0016020)		chloramphenicol - effect of drug on gene transcription, methotrexate - effect of drug on gene transcription, RNA binding proteins, artemisinin - effect of drug on gene transcription, transcription associated proteins implicated in the transcriptional machinery, transcription related proteins encoding genes	zinc finger protein, putative	doi:10.1016/j.ijpara.2022.09.008
PF3D7_1371300	28S ribosomal RNA	-0.591079280338746	0.00866776343293283	13							doi:10.1261/rna.751807
PF3D7_1423300	serine/threonine protein phosphatase 7	-2.30662098136303	0.00928378000370259	14	protein serine/threonine phosphatase activity (GO:0004722), calcium ion binding (GO:0005509), protein binding (GO:0005515), hydrolase activity (GO:0016787)	protein dephosphorylation (GO:0006470)	nucleus (GO:0005634), cytoplasm (GO:0005737), cytosol (GO:0005829)		phosphatome - phosphatases of Plasmodium falciparum, nuclear proteome, putative organization of the kinetochore, phosphoproteome, the phosphoproteome of Plasmodium falciparum infected RBCs, protein phosphorylation, proteins involved in steps during passage through prophase, proteins with conserved phosphatase related superfamily domains	serine/threonine protein phosphatase 7	doi:10.1111/j.1365-2958.2006.05119.x ; doi:10.1186/1471-2164-9-412 ; doi:10.1016/j.chom.2014.05.020 ; doi:10.1016/s0166-6851(01)00260-2 ; doi:10.1186/1471-2199-5-6
PF3D7_0102500	erythrocyte binding antigen-181	-1.78695926369775	0.00993069216009424	1	heparin binding (GO:0008201), sialic acid binding (GO:0033691), host cell surface receptor binding (GO:0046789), binding (GO:0005488)	obsolete pathogenesis (GO:0009405), entry into host (GO:0044409), cell-cell adhesion (GO:0098609)	integral component of membrane (GO:0016021), microneme (GO:0020009), extracellular vesicle (GO:1903561)	GO:1903561; GO:0044409; GO:0008201; GO:0005488	domains of merozoite surface proteins, important interacting proteins, functional annotation of merozoite invasion-related proteins, protein-protein Interactions between human erythrocytes and Plasmodium falciparum, components of exosomes, exportome, parasite invasion ligands and human erythrocyte receptors, location of lipid raft-associated proteins, merozoite ligands, their erythrocyte receptor…	erythrocyte binding antigen-181	doi:10.1073/pnas.0307318101 ; doi:10.1073/pnas.0510648103 ; doi:10.1128/IAI.01331-08 ; doi:10.1074/jbc.M211446200 ; doi:10.1016/j.biochi.2005.01.005 ; doi:10.1038/srep03178
PF3D7_1149200	ring-infected erythrocyte surface antigen	-2.31485868272064	0.0111167975994693	11			Maurer's cleft (GO:0020036), host cell part (GO:0033643)	GO:0033643	proteins of detergent-resistant membranes, localization and function of some Hsp40s and Hsp70s, exported proteins containing a PHIST domain, genes coding for chaperones and their regulators, WD40 proteins as platforms of protein-protein interactions, components of exosomes, total palmitome of Plasmodium falciparum, phosphoproteome, the phosphoproteome of Plasmodium falciparum infected RBCs	ring-infected erythrocyte surface antigen	doi:10.1111/j.1365-2958.2005.04603.x ; doi:10.1038/nature04104; doi:10.1038/nature01097
PF3D7_0104900	Rnase MRP	-1.9548668189911	0.0135148313857879	1					various features of C/D and H/ACA snoRNAs	RNase MRP	doi:10.1261/rna.751807
PF3D7_0402300	reticulocyte binding protein homologue 1	-2.31714413428635	0.0135148313857879	4	heparin binding (GO:0008201), host cell surface receptor binding (GO:0046789), binding (GO:0005488), host cell surface binding(GO:0046812)	cell-cell adhesion (GO:0098609)	integral component of membrane (GO:0016021), apical complex (GO:0020007), rhoptry (GO:0020008)	GO:0020008; GO:0008201; GO:0005488; GO:0046812	lysine acetylated proteins, domains of merozoite surface proteins, functional annotation of merozoite invasion-related proteins, parasite invasion ligands and human erythrocyte receptors, location of lipid raft-associated proteins, peptides with confirmed methylated lysine residues, merozoite ligands, their erythrocyte receptors, subcellular localization of proteins involved in invasion, transcri…	reticulocyte binding protein homologue 1 normocyte binding protein 1	doi:10.1111/j.1365-2958.2004.04388.x ; doi:10.1371/journal.pone.0000645 ; doi:10.1038/srep03178 ; doi:10.1084/jem.194.11.1571 ; doi:10.1111/j.1462-5822.2009.01358.x
PF3D7_1411000	conserved Plasmodium protein, unknown function	-2.19678355576577	0.0152245412245875	14					alternative splicing events confirmed by RNA-Seq	conserved Plasmodium protein, unknown function	doi:10.1111/j.1365-2958.2009.07026.x; doi:10.1038/nature01097
PF3D7_1017500	myosin essential light chain ELC	-2.14697083383086	0.0173683736549454	10	protein binding (GO:0005515), binding (GO:0005488)		nucleus (GO:0005634), cell surface (GO:0009986), inner membrane pellicle complex (GO:0070258)	GO:0070258; GO:0009986; GO:0005488	functional orthologs of known cell cycle proteins in E. coli, differential proteome analysis under drug treatment, genes for which expression is significantly correlated with coma score, effect of hyperoxia on gene expression, molecular motor prototypes	myosin essential light chain ELC	doi:10.1038/nature04104 ; doi:10.1074/jbc.M117.802769 ; doi:10.1074/jbc.M117.813972
PF3D7_1328700	Plasmodium RNA of unknown function RUF1	-2.52112840295688	0.0174031232956218	13							doi:10.1261/rna.751807
PF3D7_1003600	inner membrane complex protein 1c, putative	-2.05050131157193	0.0192247358297199	10	protein binding (GO:0005515), binding (GO:0005488)		nucleus (GO:0005634), inner membrane pellicle complex (GO:0070258)	GO:0070258; GO:0005488	important interacting proteins, components of the linear motor responsible for merozoite motility in invasion, peptides with confirmed methylated lysine residues, nuclear proteome, total palmitome of Plasmodium falciparum, phosphoproteome, phosphoproteome of the merozoite, transcripts translationally regulated in asexual blood stages	inner membrane complex protein 1c, putative	doi:10.1038/nbt.1597 ; doi:10.1083/jcb.200406068; doi:10.1007/s00436-014-4093-4 ; doi:10.1093/molbev/msn070 ; doi:10.1038/nature04104
PF3D7_1010300	succinate dehydrogenase subunit 4, putative	-1.34571143022855	0.0274299018795152	10					artemisinin - effect of drug on gene transcription, differentially expressed genes in different stages treated with cAMP, single gene/enzyme deletions predicted to cause impairment of metabolic networks, mitochondrial electron flow, phosphoproteome of the merozoite	succinate dehydrogenase subunit 4, putative	doi:10.1016/j.mito.2009.08.004; doi:10.1038/nature01097
PF3D7_MIT01100	ribosomal RNA fragment RNA 1	-2.24952813981056	0.0281648072831117	Mitochondrial							doi:10.1371/journal.pone.0038320 ; doi:10.1016/j.parint.2011.02.001
PF3D7_1410400	rhoptry-associated protein 1	-1.3530905627266	0.035030171616145	14	RNA binding (GO:0003723), protein binding (GO:0005515), binding (GO:0005488)		nucleus (GO:0005634), symbiont-containing vacuole (GO:0020003), rhoptry (GO:0020008), food vacuole (GO:0020020), extracellular vesicle (GO:1903561), host cell part (GO:0033643)	GO:0020008; GO:1903561; GO:0033643; GO:0005488	lysine acetylated proteins, proteins of detergent-resistant membranes, food vacuole proteome, functional annotation of merozoite invasion-related proteins, top ranked surface exposed proteins, S-glutathionylated proteins, highest expressed genes based on mRNA abundance, location of lipid raft-associated proteins, merozoite protein complexes, S-nitrosylated proteins, nuclear proteome, total palmit…	rhoptry-associated protein 1	doi:10.1016/0166-6851(90)90103-s ; doi:10.1038/nature04104 ; doi:10.1016/j.bbamcr.2014.12.030 ; doi:10.1016/j.meegid.2010.03.013 ; doi:10.1371/journal.ppat.1000328 ; doi:10.1111/cmi.12733
PF3D7_1012400	hypoxanthine-guanine phosphoribosyltransferase	-0.63278395723224	0.0408714078876836	10	nucleotide binding (GO:0000166), magnesium ion binding (GO:0000287), RNA binding (GO:0003723), hypoxanthine phosphoribosyltransferase activity (GO:0004422), guanine phosphoribosyltransferase activity (GO:0052657), binding (GO:0005488)	purine ribonucleoside salvage (GO:0006166), adenine salvage (GO:0006168), guanine salvage (GO:0006178), nucleoside metabolic process (GO:0009116), response to xenobiotic stimulus (GO:0009410), GMP salvage (GO:0032263), IMP salvage (GO:0032264), hypoxanthine metabolic process (GO:0046100)	cytoplasm (GO:0005737)	GO:0005488	the ART proteome, established and putative Maurer's clefts proteins, genes whose expression is highly positively or negatively correlated with pfcrt or pfmdr1, drug targets, single gene/enzyme deletions predicted to cause impairment of metabolic networks, essential metabolic genes, S-glutathionylated proteins, highest expressed genes based on mRNA abundance, peptides with confirmed methylated lys…	hypoxanthine-guanine phosphoribosyltransferase	doi:10.1002/prot.22129 ; doi:10.1016/0378-1119(90)90163-l ; doi:10.1021/bi102039b ; doi:10.1021/acs.jcim.6b00203 ; doi:10.1093/nar/15.24.10469 ; doi:10.1021/pr300858g ; doi:10.1016/j.molbiopara.2004.05.014 ; doi:10.1021/acs.biochem.7b01027 ; doi:10.1016/j.ejmech.2019.111667
PF3D7_0730800	Plasmodium exported protein, unknown function	-1.9500982562587	0.0491632363731409	7			host cell (GO:0043657)		lysine acetylated proteins, functional annotation of merozoite invasion-related proteins, functional orthologs of known cell cycle proteins in E. coli, exportome, phosphoproteome of the merozoite, phosphoproteome, protein-protein associations involving proteases, transcriptomic response of dihydroartemisinin (DHA) treated K1 strain trophozoites, candidate genes related to virulence	Plasmodium exported protein, unknown function	doi:10.1186/gb-2006-7-2-r12 ; doi:10.1038/nature04104
PF3D7_0731500	erythrocyte binding antigen-175	-3.1809594710719	1.08867585001813e-10	7	heparin binding (GO:0008201), host cell surface receptor binding (GO:0046789), binding (GO:0005488), host cell surface binding (GO:0046812)	obsolete pathogenesis (GO:0009405), entry into host (GO:0044409), modulation by symbiont of host receptor-mediated signal transduction (GO:0075109)	integral component of membrane (GO:0016021), microneme (GO:0020009), extracellular vesicle (GO:1903561)	GO:1903561; GO:0020009; GO:0044409; GO:0008201; GO:0005488; GO:0046812	the ART proteome, proteins of detergent-resistant membranes, domains of merozoite surface proteins, functional annotation of merozoite invasion-related proteins, protein-protein interactions between human erythrocytes and Plasmodium falciparum, function orthologs of known cell cycle proteins in E. coli, parasite invasion ligands and human erythrocyte receptors, location of lipid raft-associated p…	erythrocyte binding antigen-175	doi: 10.1371/journal.ppat.1003390 ; doi: 10.1038/nature04104
PF3D7_1148600	18S ribosomal RNA	-2.1546266159155	1.22781706159026e-23	11					methotrexate - effect of drug on gene transcription	rRNA	doi:10.1261/rna.751807
PF3D7_0726000	28S ribosomal RNA	-1.09625980554566	1.25366548455574e-09	7					structure and processing of pre rRNA	28S ribosomal RNA	doi:10.1261/rna.751807
PF3D7_0532000	28S ribosomal RNA	-1.09359913587526	1.27653440311522e-09	5					structure and processing of pre rRNA	28S ribosomal RNA	doi:10.1261/rna.751807
PF3D7_MIT04000	large subunit ribosomal RNA fragment E	-1.9038668735587	1.31458104095262e-05	Mitochondrial							doi:10.1371/journal.pone.0038320
PF3D7_1001500	early transcribed membrane protein 10.1	-3.04811323844953	1.36929930136562e-05	10			symbiont-containing vacuole membrane (GO:0020005), host cell part (GO:0033643)	GO:0033643	established and putative Maurer´s clefts proteins, proteins of the parasitophorous vacuolar membrane, nuclear genes with apicoplast signal sequences, gene expression affected by lumefantrine, the most 35 abundant proteins, phosphoproteome, proteome of the parasitophorous vacuole	early transcribed membrane protein 10.1	doi:10.1038/nature03188 ; doi:10.1111/j.1365-2958.2005.04983.x ; doi:10.1016/S0166-6851(02)00275-X ; doi:10.1073/pnas.0408442102
PF3D7_MIT03200	large subunit ribosomal RNA fragment A	-2.41137093514357	1.36929930136562e-05	Mitochondrial							doi:10.1016/j.parint.2011.02.001
PF3D7_0725400	conserved Plasmodium protein, unknown function	-3.03968641671705	1.6483966871174e-08	7							doi: 10.1038/nature04104 ; doi:10.1016/S0378-1119(01)00776-4
PF3D7_1035500	merozoite surface protein 6	-2.83923115366203	1.72483743789008e-06	10	protein binding (GO:0005515), protein-containing complex binding (GO:0044877), host cell surface binding(GO:0046812), binding (GO:0005488)	entry into host (GO:0044409)	cell surface (GO:0009986)	GO:0009986; GO:0044409; GO:0005488; GO:0046812	proteolytic processing of the MSP1/6/7 complex, MSP1 as na anchor in merozoite invasion, MSPDBL and MSP1 mediate merozoite invasion, function annotation of merozoite invasion-related proteins, P. falciparum genes harboring G-quadruplexes, merozoite ligands and their erythrocyte receptors, merozoite protein complexes, protein-protein associations involving proteases, subcellular localization of pr…	merozoite surface protein 6	doi:10.1016/S0166-6851(00)00350-9 ; doi:10.1016/S0166-6851(01)00336-X ; doi:10.1016/j.gene.2009.05.007 ; doi:10.1128/iai.72.4.2321-2328.2004 ; doi:10.1038/nature04104 ; doi:10.1074/jbc.M114.586495 ; doi:10.1016/j.peptides.2006.02.001 ; doi:10.1186/1475-2875-9-138
PF3D7_1418800	signal recognition particle RNA	-2.58920974001105	1.81170813053545e-06	14					geldanamycin - effect of drug on gene transcription	ncRNA	doi:10.1038/cddis.2013.521 ; doi:10.1261/rna.751807
PF3D7_0202500	early transcribed membrane protein 2	-2.67005465049817	1.88611469597024e-06	2			nucleus (GO:0005634), symbiont-containing vacuole membrane (GO:00200005), extracellular vesicle (GO:1903561), host cell part (GO:0033643)	GO:0033643; GO:1903561	lysine acetylated proteins, established and putative Maurer´s clefts proteins, proteins of the parasitophorous vacuolar membrane, characteristics of Plasmodium falciparum export proteins that remodel infected erythrocyte, functional orthologs of known cell cycle proteins in E. coli, differential proteome analysis under drug treatment, exportome -compiled from varios sources, the 35 most abundant …	early transcribed membrane protein 2	doi:10.1038/nature04104 ; doi:10.1038/nature01097 ; doi:10.1128/ec.00340-08 ; doi:10.1073/pnas.0408442102 ; doi:10.1111/j.1365-2958.2005.04983.x ; doi:10.1016/S0166-6851(02)00275-X
PF3D7_API05900	small subunit ribosomal RNA	-1.34906114815225	2.25107204393341e-06	Apicoplast							doi:10.1016/j.protis.2016.06.003
PF3D7_1035200	S-antigen	-1.80273173494667	2.36853464761491e-07	10			vacuole (GO:0005773), symbiont-containing vacuole (GO:0020003), host cell part (GO:0033643)	GO:0033643	The ART proteome, functional annotation of merozoite invasion-related proteins, differentially expressed genes in different stages treated with cAMP, exportome -compiled from various sources, phosphoproteome, properties exported to erythrocyte, protein-protein associations involving proteases, subcellular localization of proteins involves in invasion.	S-antigen	doi: 10.1016/0166-6851(92)90161-c
PF3D7_1335400	reticulocyte binding protein 2 homologue a	-2.62460278085051	2.36853464761491e-07	13	heparin binding (GO:0008201), host cell surface receptor binding (GO:0046812), binding (GO:0005488)	cell-cell adhesion (GO:0098609), entry into host (GO:0044409)	plasma membrane (GO:0005886), membrane (GO:0016020), integral component of membrane (GO:0016021), rhoptry neck (GO:1990225)	GO:0044409; GO:0008201; GO:0005488; GO:0046812	the ATG autophagic pathway, lysine acetylated proteins, domains of merozoite surface proteins, functions of the ER-Mitochondrial contacts, important interacting proteins, functional annotation of merozoite invasion-related proteins, arginine-methylated proteins, functional orthologs of known cell cycle proteins in E. coli, differential proteome analysis under drug treatment, gne gating and mRNA e…	reticulocyte binding protein 2 homologue a	doi: 10.1128/IAI.69.2.1084-1092.2001 ; PMID: 15964948 ; doi: 10.1128/IAI.70.10.5779-5789.2002 ; doi: 10.1093/emboj/cdg096 ; doi: 10.1371/journal.pone.0000645 ; doi: 10.1128/IAI.00201-11 ; doi: 10.1371/journal.ppat.1002075
PF3D7_1310700	PhIL1-interacting candidate PIC5	-2.99379599824874	2.82078296917889e-07	13	nucleic acid binding (GO:0003676), RNA binding (GO:0003723), protein binding (GO:0005515), binding (GO:0005488)	schizogony (GO:0020014), entry into host (GO:0044409)	nucleus (GO:0005634), inner membrane pellicle complex (GO:0070258)	GO:0070258; GO:0044409; GO:0005488	P. falciparum genes harboring G-quadruplexes, RNA binding proteins, functional orthologs of known cell cycle proteins in E. coli, total palmitome of Plasmodium falciparum, phosphoproteome, transcripts translationally regulated in assexual blood stages	RNA-binding protein, putative	doi: 10.1038/nature04104; doi:10.1371/journal.ppat.1009750; doi:10.1111/cmi.13341
PF3D7_0112700	28S ribosomal RNA	-1.42135316526633	3.41362684551845e-11	1					structure and processing of pre rRNA	28S ribosomal RNA	doi:10.1261/rna.751807
PF3D7_1301600	erythrocyte biding antigen-140	-2.74048062954708	3.45142950983575e-05	13	heparin binding (GO:0008201), host cell surface receptor binding (GO:0046789), binding (GO:0005488), host cell surface binding (GO:0046812)	obsolete pathogenesis (GO:0009405), leukocyte migration (GO:0050900), cell-cell adhesion (GO:0098609)	microneme (GO:0020009), plasma membrane (GO:0005886), integral component of membrane (GO:0016021)	GO:0020009; GO:0008201; GO:0005488; GO:0046812	domains of merozoite surface proteins, functional annotation of merozoite invasion-related proteins, protein-protein interactions between human erythrocytes and Plasmodium falciparum, parasite invasion ligands and human erythrocyte receptors, location of lipid raft-associated proteins, peptides with confirmed methylated lysine residues, merozoite ligands and their erythrocyte receptors, phosphopr…	erythrocyte binding antigen-140	doi:10.1046/j.1365-2958.2001.02484.x ; doi:10.1038/nature04104 ; doi:10.1016/j.molbiopara.2009.06.006 ; doi:10.1074/jbc.M113.450643 ; doi:10.1093/genetics/163.4.1327 ;doi:10.1371/journal.ppat.0030107 ; doi:10.1074/jbc.M112.409276 ; doi:10.1128/iai.00716-18 ; doi:10.1038/nm807 ; doi:10.1034/j.1399-3011.2003.00079.x ; doi:10.1371/journal.pone.0115437 ; doi:10.1182/blood-2002-10-3076 ; doi:10.1128/i…
PF3D7_1102800	early transcribed membrane protein 11.2	-2.82829232141104	4.1256862959419e-16	11			symbiont-containing vacuole membrane (GO:0020005), host cell part (GO:0033643)	GO:0033643	established and putative Maurer´s clefts proteins, nuclear genes with apicoplast signal sequences, the 35 most abundant proteins, phosphoproteome of the merozoite, genes differentially expressed in severe malaria	early transcribed membrane protein 11.2	doi: 10.1038/nature04104 ; PMID: 16267556; doi:10.1038/nature01097; doi:10.1091/mbc.e02-04-0240; doi:10.1038/nature03188; doi:10.1016/s0166-6851(02)00275-x
PF3D7_0531800	5.8S ribosomal RNA	-1.70829882199039	4.26974226844486e-10	5					structure and processing of pre rRNA	5.8S ribosomal RNA	doi:10.1261/rna.751807
PF3D7_0725800	5.8S ribosomal RNA	-1.70376825459544	4.26974226844486e-10	7					structure and processing of pre rRNA	5.8S ribosomal RNA	doi:10.1261/rna.751807
PF3D7_0112300	18S ribosomal RNA	-2.1679261032465	4.76935700238685e-24	1					structure and processing of pre rRNA	18S ribosomal RNA	doi:10.1261/rna.751807
PF3D7_1014100	merozoite surface protein MSA180	-3.8771388914207	4.80753620827594e-07	10	protein binding (GO:0005515), binding (GO:0005488)	exit from host cell (GO:0035891), entry into host cell (GO:0044409)	cytoplasm (GO:0005737), cell surface (GO:0009986), symbiont-containing vacuole (GO:0020003), extracellular vesicle (GO:1903561), host cell part (GO:0033643)	GO:0033643; GO:0009986; GO:1903561; GO:0044409; GO:0005488	important interacting proteins, functional annotation of merozoite invasion-related proteins, subcellular localization of proteins involved in invasion	merozoite surface protein msa180, putative	doi: 10.1038/nature04104 ; doi:10.1186/s12936-017-1760-9 ; doi:10.1016/S0378-1119(01)00776-4 ; doi:10.1038/s41598-019-42366-9 ; doi:10.15252/embj.2020107226 ; doi:10.1038/s41598-021-98707-0
PF3D7_0302200	cytoadherence linked asexual protein 3.2	-2.34693227607326	5.21991418214694e-05	3	cell adhesion molecule binding (GO:0050839), protein binding (GO:000515), anion channel activity (GO:0005253), binding (GO:0005488)	cytoadherence to microvasculature mediated by symbiont protein (GO:0020035)	nucleus (GO:0005634), host cell plasma membrane (GO:00020002), rhoptry (GO:0020008), host cell part (GO:0033643)	GO:0020008; GO:0033643; GO:0005488; GO:0005253	lsyine acetylated proteins, proteins of detergent-resistant membranes, estabilished and putative Maurer´s clefts proteins, possible reasons for increased permeability of host cell membrane, functional annotation of maerozoite invasion-related proteins, top ranked surface exposed proteins, epigenetic switching mechanisms, components of exosomes, exported proteins of Plasmodium falciparum with conf…	cytoadherence linked asexual protein 3.2	doi:10.1111/j.1365-2958.2011.07572.x ; doi:10.1038/22964 ; doi:10.1371/journal.ppat.1008363 ; doi:10.1016/S0166-6851(01)00378-4 ; doi:10.1016/j.molbiopara.2005.05.003 ; doi:10.1016/j.cell.2011.05.002 ; doi:10.1073/pnas.040561197 ; doi:10.1016/j.parint.2006.11.001 ; doi:10.1016/j.molbiopara.2007.11.004
PF3D7_0918500	telomerase RNA	-1.26926953820653	5.50000876794543e-05	9					various features of C/D and H/ACA snoRNAs, secondary structure of spliceosomal RNAs, telomerase and some telomerase associated proteins	telomerase RNA	doi: 10.1261/rna.751807 ; doi:10.1371/journal.pone.0108930
PF3D7_0830200	28S ribosomal RNA	-1.1723216343404	6.07367704025616e-07	8
PF3D7_0531600	18S ribosomal RNA	-1.8678432643394	6.58461775511043e-23	5					structure and processing of pre rRNA	18S ribosomal RNA	doi:10.1261/rna.751807
PF3D7_0725600	18S ribosomal RNA	-1.85273540170002	6.58461775511043e-23	7					structure and processing of pre rRNA	18S ribosomal RNA	doi:10.1261/rna.751807
PF3D7_1371000	18S ribosomal RNA	-2.10930138316862	6.58461775511043e-23	13					structure and processing of pre rRNA	18S	doi:10.1261/rna.751807
PF3D7_API05700	small subunit ribosomal RNA	-1.32378568820543	6.86536544552918e-06	Apicoplast					genes of the apicoplast genome	small subunit ribosomal RNA	doi:10.1016/j.protis.2016.06.003
PF3D7_1335300	reticulocyte binding protein 2 homologue b	-2.14516282709447	7.27241162372676e-05	13	heparin binding (GO:0008201), host cell surface receptor binding (GO:0046789), binding (GO:0005488), host cell surface binding (GO:0046812)	entry into host (GO:0044409)	rhoptry (GO:0020008), rhoptry neck (GO:1990225)	GO:0020008; GO:0044409; GO:0008201; GO:0005488; GO:0046812	domains of merozoite surface proteins, functional annotation of merozoite invasion-related proteins, parasite invasion ligands and human erythrocyte receptors, localization of lipid raft-associated proteins, merozoite ligands and their erythrocyte receptors, protein-protein associations involving proteases, subcellular localization of proteins involved in invasion	reticulocyte binding protein 2 homologue b	doi:10.1371/journal.pone.0017102 ; doi:10.1093/infdis/jix280 ; doi:10.1371/journal.ppat.1007436 ; doi:10.1128/iai.69.2.1084-1092.2001 ; doi:10.1111/j.1365-2958.2009.07040.x ; doi:10.1042/BJ20121694 ; doi:10.1038/s41598-020-58300-3 ; doi:10.1038/srep03178 ; doi:10.1093/emboj/cdg096 ; doi:10.1038/nature04104 ; doi:10.1128/iai.00122-07 ; doi:10.1111/mmi.13468
PF3D7_1370300	membrane associated histidine-rich protein 1	-2.45438811931816	7.27241162372676e-05	13	protein binding (GO:0005515), binding (GO:0005488)		Maurer´s cleft (GO:0020036), integral component of membrane (GO:0016021), extracellular vesicle (GO:1903561), host cell part (GO:0033643)	GO:1903561; GO:0033643; GO:0005488	established and putative Maurer´s clefts proteins, P. falciparum genes harboring G-quadruplexes, translocon of exported proteins (PTEX), model of PfEMP1 export, subcellular location of exported proteins, interactions between modified host cell membrane and endothelial cell, exported proteins of Plasmodium falciparum with confirmed location, exportome, total palmitome of Plasmodium falciparum, pho…	membrane associated histidine-rich protein	doi:10.1016/j.bbrc.2009.01.050 ; doi:10.1038/ncomms11659 ; doi:10.1074/jbc.M305851200 ; doi:10.1111/j.1365-2958.2008.06235.x
PF3D7_1038400	gametocyte-specific protein	-3.33988288667218	7.7793069233544e-05	10		gamete generation (GO:0007276)	integral component of membrane (GO:0016021), host cell cytoplasm (GO:0030430), host cell part (GO:0033643)	GO:0033643	established and putative Maurer´s clefts proteins, functional orthologs of known cell cycle proteins in E. coli, exportome	gametocyte-specific protein	doi:10.1038/nature04104
PF3D7_0525800	inner membrane complex protein 1g, putative	-2.57130856001688	8.09698784407776e-06	5			inner membrane pellicle complex (GO:0070258)	GO:0070258	protein kinase G-dependent phosphorylation in schizonts, top ranked surface exposed proteins, differentially expressed genes in different stages treated with cAMP, cGMP/PKG signalling in egress/invasion, functional orthologs of known cell cycle proteins in E. coli, control of microtubule assembly, components of the linear motor responsible for merozoite motility in invasion, peptides with confirm…	inner membrane complex protein 1g, putative	doi:10.1083/jcb.200406068 ; doi:10.1038/nature04104 ; doi:10.1038/nbt.1597
PF3D7_1035300	glutamate-rich protein GLURP	-3.27824159242017	9.82490448550302e-07	10	protein binding (GO:0005515), binding (GO:0005488)		cell surface (GO:0009986), symbiont-containing vacuole (GO:0020003), extracellular vesicle (GO:1903561), host cell part (GO:003643)	GO:0033643; GO:0009986; GO:1903561; GO:0005488	lysine acetylated proteins, important interacting proteins, functional annotation of merozoite invasion-related proteins, nuclear genes with apicoplast signal sequences, phosphoproteome, proteins released from infected cells during rupture, subcellular localization of proteins involved in invasion, transcripts translationally regulated in assexual blood stages, candidate genes related to virulence	glutamate-rich protein GLURP	doi:10.1186/s13071-018-2630-1 ; doi:10.1016/0166-6851(91)90135-S ; doi:10.1038/nature04104 ; doi:10.1093/infdis/jiw617 ; doi:10.1128/iai.66.1.11-17.1998

## Sheet: DEG ordered by chromosome
GeneID	Name	log2(FC)	P-adj	Chromosome	Molecular Function	Biological Process	Cellular Component	GO enrichment	Malaria Parasite Metabolic Pathways/PlasmoDB
									Pathway	Activity	References
PF3D7_0102500	erythrocyte binding antigen-181	-1.78695926369775	0.00993069216009424	1	heparin binding (GO:0008201), sialic acid binding (GO:0033691), host cell surface receptor binding (GO:0046789), binding (GO:0005488)	obsolete pathogenesis (GO:0009405), entry into host (GO:0044409), cell-cell adhesion (GO:0098609)	integral component of membrane (GO:0016021), microneme (GO:0020009), extracellular vesicle (GO:1903561)	GO:1903561; GO:0044409; GO:0008201; GO:0005488	domains of merozoite surface proteins, important interacting proteins, functional annotation of merozoite invasion-related proteins, protein-protein Interactions between human erythrocytes and Plasmodium falciparum, components of exosomes, exportome, parasite invasion ligands and human erythrocyte receptors, location of lipid raft-associated proteins, merozoite ligands, their erythrocyte receptor…	erythrocyte binding antigen-181	doi:10.1073/pnas.0307318101 ; doi:10.1073/pnas.0510648103 ; doi:10.1128/IAI.01331-08 ; doi:10.1074/jbc.M211446200 ; doi:10.1016/j.biochi.2005.01.005 ; doi:10.1038/srep03178
PF3D7_0104900	Rnase MRP	-1.9548668189911	0.0135148313857879	1					various features of C/D and H/ACA snoRNAs	RNase MRP	doi:10.1261/rna.751807
PF3D7_0112300	18S ribosomal RNA	-2.1679261032465	4.76935700238685e-24	1					structure and processing of pre rRNA	18S ribosomal RNA	doi:10.1261/rna.751807
PF3D7_0112700	28S ribosomal RNA	-1.42135316526633	3.41362684551845e-11	1					structure and processing of pre rRNA	28S ribosomal RNA	doi:10.1261/rna.751807
PF3D7_0202500	early transcribed membrane protein 2	-2.67005465049817	1.88611469597024e-06	2			nucleus (GO:0005634), symbiont-containing vacuole membrane (GO:00200005), extracellular vesicle (GO:1903561), host cell part (GO:0033643)	GO:0033643; GO:1903561	lysine acetylated proteins, established and putative Maurer´s clefts proteins, proteins of the parasitophorous vacuolar membrane, characteristics of Plasmodium falciparum export proteins that remodel infected erythrocyte, functional orthologs of known cell cycle proteins in E. coli, differential proteome analysis under drug treatment, exportome -compiled from varios sources, the 35 most abundant …	early transcribed membrane protein 2	doi:10.1038/nature04104 ; doi:10.1038/nature01097 ; doi:10.1128/ec.00340-08 ; doi:10.1073/pnas.0408442102 ; doi:10.1111/j.1365-2958.2005.04983.x ; doi:10.1016/S0166-6851(02)00275-X
PF3D7_0302200	cytoadherence linked asexual protein 3.2	-2.34693227607326	5.21991418214694e-05	3	cell adhesion molecule binding (GO:0050839), protein binding (GO:000515), anion channel activity (GO:0005253), binding (GO:0005488)	cytoadherence to microvasculature mediated by symbiont protein (GO:0020035)	nucleus (GO:0005634), host cell plasma membrane (GO:00020002), rhoptry (GO:0020008), host cell part (GO:0033643)	GO:0020008; GO:0033643; GO:0005488; GO:0005253	lsyine acetylated proteins, proteins of detergent-resistant membranes, estabilished and putative Maurer´s clefts proteins, possible reasons for increased permeability of host cell membrane, functional annotation of maerozoite invasion-related proteins, top ranked surface exposed proteins, epigenetic switching mechanisms, components of exosomes, exported proteins of Plasmodium falciparum with conf…	cytoadherence linked asexual protein 3.2	doi:10.1111/j.1365-2958.2011.07572.x ; doi:10.1038/22964 ; doi:10.1371/journal.ppat.1008363 ; doi:10.1016/S0166-6851(01)00378-4 ; doi:10.1016/j.molbiopara.2005.05.003 ; doi:10.1016/j.cell.2011.05.002 ; doi:10.1073/pnas.040561197 ; doi:10.1016/j.parint.2006.11.001 ; doi:10.1016/j.molbiopara.2007.11.004
PF3D7_0302500	cytoadherence linked asexual protein 3.1	-1.46040101611165	0.000822402083907639	3	RNA binding (GO:0003723), anion channel activity (GO:0005253), protein binding (GO:000515), cell adhesion molecule binding (GO:0050839), binding (GO:0005488)	cytoadherence to microvasculature mediated by symbiont protein (GO:0020035)	nucleus (GO:0005634), host cell plasma membrane (GO:0020002), rhoptry (GO:0020008), host cell cytoplasm (GO:0030430), extracellular vesicle (GO:1903561), host cell part (GO:0033643)	GO:0020008; GO:1903561; GO:0033643; GO:0005488; GO:0005253	proteins of detergent-resistant membranes, parasite proteins co-exported with Hsp70x, established and putative Maurer's clefts proteins, possible reasons for increased permeability of host cell membrane, functional annotation of merozoite invasion-related proteins, chaperones associate with proteins in various iRBC locations, functional orthologs of known cell cycle proteins in E. coli, Interacti…	cytoadherence linked asexual protein 3.1	doi:10.1016/S0166-6851(01)00378-4 ; doi:10.1371/journal.pone.0157390 ; doi:10.1128/mbio.01354-20 ; doi:10.1073/pnas.040561197 ; doi:10.1371/journal.ppat.1008363 ; doi:10.1016/j.molbiopara.2005.05.003 ; https://doi.org/10.1038/nature04104 ; doi:0.1128/mbio.02293-17 ; doi:10.1038/22964 ; doi:10.1016/j.parint.2006.11.001 ; doi:10.1111/j.1365-2958.2011.07572.x ; doi:10.1016/j.molbiopara.2007.11.004 ;…
PF3D7_0402300	reticulocyte binding protein homologue 1	-2.31714413428635	0.0135148313857879	4	heparin binding (GO:0008201), host cell surface receptor binding (GO:0046789), binding (GO:0005488), host cell surface binding(GO:0046812)	cell-cell adhesion (GO:0098609)	integral component of membrane (GO:0016021), apical complex (GO:0020007), rhoptry (GO:0020008)	GO:0020008; GO:0008201; GO:0005488; GO:0046812	lysine acetylated proteins, domains of merozoite surface proteins, functional annotation of merozoite invasion-related proteins, parasite invasion ligands and human erythrocyte receptors, location of lipid raft-associated proteins, peptides with confirmed methylated lysine residues, merozoite ligands, their erythrocyte receptors, subcellular localization of proteins involved in invasion, transcri…	reticulocyte binding protein homologue 1 normocyte binding protein 1	doi:10.1111/j.1365-2958.2004.04388.x ; doi:10.1371/journal.pone.0000645 ; doi:10.1038/srep03178 ; doi:10.1084/jem.194.11.1571 ; doi:10.1111/j.1462-5822.2009.01358.x
PF3D7_0501600	rhoptry-associated protein 2	-1.84634420276389	0.000296120738252012	5	RNA binding (GO:0003723), protein binding (GO:0005515), binding (GO:0005488)	entry into host (GO:0044409)	nucleus (GO:0005634), rhoptry (GO:0020008), food vacuole (GO:0020020), extracellular vesicle (GO:1903561)	GO:0020008; GO:1903561; GO:0044409; GO:0005488	proteins of detergent-resistant membranes, food vacuole proteome, functional annotation of merozoite invasion-related proteins, top ranked surface exposed proteins, components of exosomes, exportome, S-glutathionylated proteins, highest expressed genes based on mRNA abundance, location of lipid raft-associated proteins, peptides with confirmed methylated lysine residues, proteins of erythrocyte-d…	rhoptry-associated protein 2	doi:10.1182/blood-2017-08-802918 ; doi:10.1093/emboj/19.11.2435 ; doi:10.1016/0166-6851(96)02730-2 ; doi:10.1016/0166-6851(92)90251-E
PF3D7_0525800	inner membrane complex protein 1g, putative	-2.57130856001688	8.09698784407776e-06	5			inner membrane pellicle complex (GO:0070258)	GO:0070258	protein kinase G-dependent phosphorylation in schizonts, top ranked surface exposed proteins, differentially expressed genes in different stages treated with cAMP, cGMP/PKG signalling in egress/invasion, functional orthologs of known cell cycle proteins in E. coli, control of microtubule assembly, components of the linear motor responsible for merozoite motility in invasion, peptides with confirm…	inner membrane complex protein 1g, putative	doi:10.1083/jcb.200406068 ; doi:10.1038/nature04104 ; doi:10.1038/nbt.1597
PF3D7_0531600	18S ribosomal RNA	-1.8678432643394	6.58461775511043e-23	5					structure and processing of pre rRNA	18S ribosomal RNA	doi:10.1261/rna.751807
PF3D7_0531800	5.8S ribosomal RNA	-1.70829882199039	4.26974226844486e-10	5					structure and processing of pre rRNA	5.8S ribosomal RNA	doi:10.1261/rna.751807
PF3D7_0532000	28S ribosomal RNA	-1.09359913587526	1.27653440311522e-09	5					structure and processing of pre rRNA	28S ribosomal RNA	doi:10.1261/rna.751807
PF3D7_0613900	myosin E, putative	-2.05077629176199	0.00572763883298416	6	microfilament motor activity (GO:0000146), cytoskeletal motor activity (GO:0003774), actin binding (GO:0003779), ATP binding (GO:0005524), actin-dependent ATPase activity (GO:0030898), actin filament binding (GO:0051015), binding (GO:0005488)	actin filament organization (GO:0007015), vesicle transport along actin filament (GO:0030050), cell motility (GO:0048870)	nucleus (GO:0005634), cytoplasm (GO:0005737), cytosol (GO:0005829), actin cytoskeleton (GO:0015629), myosin complex (GO:0016459), vesicle (GO:0031982), basal part of cell (GO:0045178)	GO:0016459; GO:0005488	lysine acetylated proteins, protein kinase G-dependent phosphorylation in schizonts, P. falciparum genes harboring G-quadruplexes, network analysis of drCDC-UNK proteins and their potential protein interactions, molecular motor prototypes, nuclear proteome, total palmitome of Plasmodium falciparum, phosphoproteome of the merozoite, phosphoproteome, genes differentially expressed in severe malaria…	myosin E, putative	doi:10.1002/cm.20055 ; doi:10.1038/nature04104 ; doi:10.1111/cmi.13082
PF3D7_0707300	rhoptry-associated membrane antigen	-1.38260365791617	0.00572763883298416	7	protein binding (GO:0005515), binding (GO:0005488)	cellular protein localization (GO:0034613), entry into host (GO:0044409), cell-cell adhesion (GO:0098609)	nucleus (GO:0005634), endoplasmic reticulum (GO:0005783), Golgi apparatus (GO:0005794), symbiont-containing vacuole (GO:0020003), rhoptry (GO:0020008), anchored component of membrane (GO:0031225), rhoptry membrane (GO:0033016), membrane raft (GO:0045121), protein binding (GO:0005515), host cell part (GO:0033643)	GO:0033643; GO:0020008; GO:0044409; GO:0005488	lysine acetylated proteins, proteins of detergent-resistant membranes, genes coding for GPI-anchored membrane proteins, functional annotation of merozoite invasion-related proteins, exportome, Location of lipid raft-associated proteins, merozoite protein complexes, S-nitrosylated proteins, nuclear proteome, total palmitome of Plasmodium falciparum, phosphoproteome, phosphoproteome of the merozoit…	rhoptry-associated membrane antigen	doi:10.1128/IAI.72.6.3325-3330.2004 ; doi:10.1016/j.molbiopara.2004.05.018 ; doi:10.1074/jbc.M307859200 ; doi:10.1371/journal.ppat.1008049 ; doi:10.3389/fcimb.2020.605367
PF3D7_0725400	conserved Plasmodium protein, unknown function	-3.03968641671705	1.6483966871174e-08	7							doi: 10.1038/nature04104 ; doi:10.1016/S0378-1119(01)00776-4
PF3D7_0725600	18S ribosomal RNA	-1.85273540170002	6.58461775511043e-23	7					structure and processing of pre rRNA	18S ribosomal RNA	doi:10.1261/rna.751807
PF3D7_0725800	5.8S ribosomal RNA	-1.70376825459544	4.26974226844486e-10	7					structure and processing of pre rRNA	5.8S ribosomal RNA	doi:10.1261/rna.751807
PF3D7_0726000	28S ribosomal RNA	-1.09625980554566	1.25366548455574e-09	7					structure and processing of pre rRNA	28S ribosomal RNA	doi:10.1261/rna.751807
PF3D7_0730800	Plasmodium exported protein, unknown function	-1.9500982562587	0.0491632363731409	7			host cell (GO:0043657)		lysine acetylated proteins, functional annotation of merozoite invasion-related proteins, functional orthologs of known cell cycle proteins in E. coli, exportome, phosphoproteome of the merozoite, phosphoproteome, protein-protein associations involving proteases, transcriptomic response of dihydroartemisinin (DHA) treated K1 strain trophozoites, candidate genes related to virulence	Plasmodium exported protein, unknown function	doi:10.1186/gb-2006-7-2-r12 ; doi:10.1038/nature04104
PF3D7_0731500	erythrocyte binding antigen-175	-3.1809594710719	1.08867585001813e-10	7	heparin binding (GO:0008201), host cell surface receptor binding (GO:0046789), binding (GO:0005488), host cell surface binding (GO:0046812)	obsolete pathogenesis (GO:0009405), entry into host (GO:0044409), modulation by symbiont oh host receptor-mediated signal transduction (GO:0075109)	integral component of membrane (GO:0016021), microneme (GO:0020009), extracellular vesicle (GO:1903561)	GO:1903561; GO:0020009; GO:0044409; GO:0008201; GO:0005488; GO:0046812	the ART proteome, proteins of detergent-resistant membranes, domains of merozoite surface proteins, functional annotation of merozoite invasion-related proteins, protein-protein interactions between human erythrocytes and Plasmodium falciparum, function orthologs of known cell cycle proteins in E. coli, parasite invasion ligands and human erythrocyte receptors, location of lipid raft-associated p…	erythrocyte binding antigen-175	doi: 10.1371/journal.ppat.1003390 ; doi: 10.1038/nature04104
PF3D7_0801100	28S ribosomal RNA	-1.1396288370774	0.000886452413073052	8					P. falciparum genes harboring G-quadruplexes, structure and processing of pre rRNA	28S ribosomal RNA	doi:10.1261/rna.751807
PF3D7_0818100	C3H1-type zinc finger protein CZIF2	-2.31780737624744	0.0076198343488173	8	metal ion binding (GO:0046872)		cytosol (GO:0005829), membrane (GO:0016020)		chloramphenicol - effect of drug on gene transcription, methotrexate - effect of drug on gene transcription, RNA binding proteins, artemisinin - effect of drug on gene transcription, transcription associated proteins implicated in the transcriptional machinery, transcription related proteins encoding genes	zinc finger protein, putative	doi:10.1016/j.ijpara.2022.09.008
PF3D7_0830200	28S ribosomal RNA	-1.1723216343404	6.07367704025616e-07	8
PF3D7_0831800	histidine-rich protein II	-2.15282545321613	0.000139856876174645	8		heme catabolic process (GO:0042167)	cytoplasm (GO:0005737), food vacuole (GO:0020020), Maurer´s cleft (GO:0020036), host cell cytoplasm (GO:0030430), host cell membrane (GO:0033644), host cell part (GO:0033643)	GO:0033643	cloroquine - effect of drug on gene transcription, exportome, hemoglobin digestion, properties of proteins exported to erythrocyte, subcellular localization of exported proteins, candidate genes related to virulence	histidine-rich protein II	doi:10.1086/432010 ; doi:10.1371/journal.pone.0008091 ; doi:10.1016/j.actatropica.2012.09.015 ; doi:10.1186/s12936-020-03328-z ; doi:10.1073/pnas.83.16.6065 ; doi:10.1126/science.271.5246.219 ; doi:10.1128/mbio.00617-16 ;doi:10.1186/s13104-019-4361-6 ; doi:10.1186/1475-2875-13-34 ; doi:10.1371/journal.pone.0112087 ; doi:10.1371/journal.pone.0126805 ; doi:10.1038/s41598-018-35471-8 ; doi:10.1038/s…
PF3D7_0918500	telomerase RNA	-1.26926953820653	5.50000876794543e-05	9					various features of C/D and H/ACA snoRNAs, secondary structure of spliceosomal RNAs, telomerase and some telomerase associated proteins	telomerase RNA	doi: 10.1261/rna.751807 ; doi:10.1371/journal.pone.0108930
PF3D7_1001500	early transcribed membrane protein 10.1	-3.04811323844953	1.36929930136562e-05	10			symbiont-containing vacuole membrane (GO:0020005), host cell part (GO:0033643)	GO:0033643	established and putative Maurer´s clefts proteins, proteins of the parasitophorous vacuolar membrane, nuclear genes with apicoplast signal sequences, gene expression affected by lumefantrine, the most 35 abundant proteins, phosphoproteome, proteome of the parasitophorous vacuole	early transcribed membrane protein 10.1	doi:10.1038/nature03188 ; doi:10.1111/j.1365-2958.2005.04983.x ; doi:10.1016/S0166-6851(02)00275-X ; doi:10.1073/pnas.0408442102
PF3D7_1003600	inner membrane complex protein 1c, putative	-2.05050131157193	0.0192247358297199	10	protein binding (GO:0005515), binding (GO:0005488)		nucleus (GO:0005634), inner membrane pellicle complex (GO:0070258)	GO:0070258; GO:0005488	important interacting proteins, components of the linear motor responsible for merozoite motility in invasion, peptides with confirmed methylated lysine residues, nuclear proteome, total palmitome of Plasmodium falciparum, phosphoproteome, phosphoproteome of the merozoite, transcripts translationally regulated in asexual blood stages	inner membrane complex protein 1c, putative	doi:10.1038/nbt.1597 ; doi:10.1083/jcb.200406068; doi:10.1007/s00436-014-4093-4 ; doi:10.1093/molbev/msn070 ; doi:10.1038/nature04104
PF3D7_1010300	succinate dehydrogenase subunit 4, putative	-1.34571143022855	0.0274299018795152	10					artemisinin - effect of drug on gene transcription, differentially expressed genes in different stages treated with cAMP, single gene/enzyme deletions predicted to cause impairment of metabolic networks, mitochondrial electron flow, phosphoproteome of the merozoite	succinate dehydrogenase subunit 4, putative	doi:10.1016/j.mito.2009.08.004; doi:10.1038/nature01097
PF3D7_1012400	hypoxanthine-guanine phosphoribosyltransferase	-0.63278395723224	0.0408714078876836	10	nucleotide binding (GO:0000166), magnesium ion binding (GO:0000287), RNA binding (GO:0003723), hypoxanthine phosphoribosyltransferase activity (GO:0004422), guanine phosphoribosyltransferase activity (GO:0052657), binding (GO:0005488)	purine ribonucleoside salvage (GO:0006166), adenine salvage (GO:0006168), guanine salvage (GO:0006178), nucleoside metabolic process (GO:0009116), response to xenobiotic stimulus (GO:0009410), GMP salvage (GO:0032263), IMP salvage (GO:0032264), hypoxanthine metabolic process (GO:0046100)	cytoplasm (GO:0005737)	GO:0005488	the ART proteome, established and putative Maurer's clefts proteins, genes whose expression is highly positively or negatively correlated with pfcrt or pfmdr1, drug targets, single gene/enzyme deletions predicted to cause impairment of metabolic networks, essential metabolic genes, S-glutathionylated proteins, highest expressed genes based on mRNA abundance, peptides with confirmed methylated lys…	hypoxanthine-guanine phosphoribosyltransferase	doi:10.1002/prot.22129 ; doi:10.1016/0378-1119(90)90163-l ; doi:10.1021/bi102039b ; doi:10.1021/acs.jcim.6b00203 ; doi:10.1093/nar/15.24.10469 ; doi:10.1021/pr300858g ; doi:10.1016/j.molbiopara.2004.05.014 ; doi:10.1021/acs.biochem.7b01027 ; doi:10.1016/j.ejmech.2019.111667
PF3D7_1014100	merozoite surface protein MSA180	-3.8771388914207	4.80753620827594e-07	10	protein binding (GO:0005515), binding (GO:0005488)	exit from host cell (GO:0035891), entry into host cell (GO:0044409)	cytoplasm (GO:0005737), cell surface (GO:0009986), symbiont-containing vacuole (GO:0020003), extracellular vesicle (GO:1903561), host cell part (GO:0033643)	GO:0033643; GO:0009986; GO:1903561; GO:0044409; GO:0005488	important interacting proteins, functional annotation of merozoite invasion-related proteins, subcellular localization of proteins involved in invasion	merozoite surface protein msa180, putative	doi: 10.1038/nature04104 ; doi:10.1186/s12936-017-1760-9 ; doi:10.1016/S0378-1119(01)00776-4 ; doi:10.1038/s41598-019-42366-9 ; doi:10.15252/embj.2020107226 ; doi:10.1038/s41598-021-98707-0
PF3D7_1016900	early transcribed membrane protein 10.3	1.47884285180955	0.00322364476437871	10			symbiont-containing vacuole membrane (GO:0020005), host cell part (GO:0033643)	GO:0033643	established and putative Maurer's clefts proteins, proteins of the parasitophorous vacuolar membrane, candidate genes related to virulence	early transcribed membrane protein 10.3	doi: 10.1128/EC.00336-09; doi:10.1111/j.1365-2958.2005.04983.x; doi:10.1091/mbc.e02-04-0240; doi:10.1073/pnas.0408442102
PF3D7_1017500	myosin essential light chain ELC	-2.14697083383086	0.0173683736549454	10	protein binding (GO:0005515), binding (GO:0005488)		nucleus (GO:0005634), cell surface (GO:0009986), inner membrane pellicle complex (GO:0070258)	GO:0070258; GO:0009986; GO:0005488	functional orthologs of known cell cycle proteins in E. coli, differential proteome analysis under drug treatment, genes for which expression is significantly correlated with coma score, effect of hyperoxia on gene expression, molecular motor prototypes	myosin essential light chain ELC	doi:10.1038/nature04104 ; doi:10.1074/jbc.M117.802769 ; doi:10.1074/jbc.M117.813972
PF3D7_1026600	conserved Plasmodium protein, unknown function	-2.13491920250539	0.00572763883298416	10			nucleus (GO:0005634)		protein-protein associations involving proteases, candidate genes related to virulence	conserved Plasmodium protein, unknown function	doi:10.1038/nature04104; doi:10.1038/nature01097
PF3D7_1035200	S-antigen	-1.80273173494667	2.36853464761491e-07	10			vacuole (GO:0005773), symbiont-containing vacuole (GO:0020003), host cell part (GO:0033643)	GO:0033643	The ART proteome, functional annotation of merozoite invasion-related proteins, differentially expressed genes in different stages treated with cAMP, exportome -compiled from various sources, phosphoproteome, properties exported to erythrocyte, protein-protein associations involving proteases, subcellular localization of proteins involves in invasion.	S-antigen	doi: 10.1016/0166-6851(92)90161-c
PF3D7_1035300	glutamate-rich protein GLURP	-3.27824159242017	9.82490448550302e-07	10	protein binding (GO:0005515), binding (GO:0005488)		cell surface (GO:0009986), symbiont-containing vacuole (GO:0020003), extracellular vesicle (GO:1903561), host cell part (GO:003643)	GO:0033643; GO:0009986; GO:1903561; GO:0005488	lysine acetylated proteins, important interacting proteins, functional annotation of merozoite invasion-related proteins, nuclear genes with apicoplast signal sequences, phosphoproteome, proteins released from infected cells during rupture, subcellular localization of proteins involved in invasion, transcripts translationally regulated in assexual blood stages, candidate genes related to virulence	glutamate-rich protein GLURP	doi:10.1186/s13071-018-2630-1 ; doi:10.1016/0166-6851(91)90135-S ; doi:10.1038/nature04104 ; doi:10.1093/infdis/jiw617 ; doi:10.1128/iai.66.1.11-17.1998
PF3D7_1035500	merozoite surface protein 6	-2.83923115366203	1.72483743789008e-06	10	protein binding (GO:0005515), protein-containing complex binding (GO:0044877), host cell surface binding(GO:0046812), binding (GO:0005488)	entry into host (GO:0044409)	cell surface (GO:0009986)	GO:0009986; GO:0044409; GO:0005488; GO:0046812	proteolytic processing of the MSP1/6/7 complex, MSP1 as na anchor in merozoite invasion, MSPDBL and MSP1 mediate merozoite invasion, function annotation of merozoite invasion-related proteins, P. falciparum genes harboring G-quadruplexes, merozoite ligands and their erythrocyte receptors, merozoite protein complexes, protein-protein associations involving proteases, subcellular localization of pr…	merozoite surface protein 6	doi:10.1016/S0166-6851(00)00350-9 ; doi:10.1016/S0166-6851(01)00336-X ; doi:10.1016/j.gene.2009.05.007 ; doi:10.1128/iai.72.4.2321-2328.2004 ; doi:10.1038/nature04104 ; doi:10.1074/jbc.M114.586495 ; doi:10.1016/j.peptides.2006.02.001 ; doi:10.1186/1475-2875-9-138
PF3D7_1035900	merozoites-associated armadillo repeats protein	-2.22461074019446	0.00127486721402407	10	RNA binding (GO:0003723)	entry into host (GO:0044409)	cell surface (GO:0009986), apical part of cell (GO:0045177)	GO:0009986; GO:0044409	food vacuole proteome, tafenoquine - effect of drug on gene transcription, chloroquine - effect of drug on gene transcription	probable protein, unknown function	doi:10.1038/nature04104 ; doi:10.3389/fimmu.2020.00505
PF3D7_1038400	gametocyte-specific protein	-3.33988288667218	7.7793069233544e-05	10		gamete generation (GO:0007276)	integral component of membrane (GO:0016021), host cell cytoplasm (GO:0030430), host cell part (GO:0033643)	GO:0033643	established and putative Maurer´s clefts proteins, functional orthologs of known cell cycle proteins in E. coli, exportome	gametocyte-specific protein	doi:10.1038/nature04104
PF3D7_1102800	early transcribed membrane protein 11.2	-2.82829232141104	4.1256862959419e-16	11			symbiont-containing vacuole membrane (GO:0020005), host cell part (GO:0033643)	GO:0033643	established and putative Maurer´s clefts proteins, nuclear genes with apicoplast signal sequences, the 35 most abundant proteins, phosphoproteome of the merozoite, genes differentially expressed in severe malaria	early transcribed membrane protein 11.2	doi: 10.1038/nature04104 ; PMID: 16267556; doi:10.1038/nature01097; doi:10.1091/mbc.e02-04-0240; doi:10.1038/nature03188; doi:10.1016/s0166-6851(02)00275-x
PF3D7_1125800	kelch domain-containing protein, putative	-2.81673705321592	0.00150640016306072	11	protein binding (GO:0005515)				lysine acetylated proteins, functional orthologs of known cell cycle proteins in E. coli, effect of hyperoxia on gene expression, phosphoproteome, phosphoproteome of the merozoite, transcripts translationally regulated in asexual blood stages	kelch domain-containing protein, putative	doi:10.1038/nature04104; doi:10.1038/nature01097
PF3D7_1126700	conserved Plasmodium protein, unknown function	-2.40590410526714	0.00329871465902893	11	microtubule binding (GO:0008017), dynein light intermediate chain binding (GO:0051959)	cytoskeleton-dependent intracellular transport (GO:0030705), cytoplasmic microtubule organization (GO:0031122)	cytoplasm (GO:0005737), centrosome (GO:0005813)		the ATG autophagic pathway, important interacting proteins, potential PKG substrates in schizonts, peptides with confirmed methylated lysine residues	autophagy-related protein 23	doi:10.1038/nature04104; doi:10.1038/nature01097
PF3D7_1148600	18S ribosomal RNA	-2.1546266159155	1.22781706159026e-23	11					methotrexate - effect of drug on gene transcription	rRNA	doi:10.1261/rna.751807
PF3D7_1148620	5.8S ribosomal RNA	-1.55554770203662	0.00124283004819218	11							doi:10.1261/rna.751807
PF3D7_1149200	ring-infected erythrocyte surface antigen	-2.31485868272064	0.0111167975994693	11			Maurer's cleft (GO:0020036), host cell part (GO:0033643)	GO:0033643	proteins of detergent-resistant membranes, localization and function of some Hsp40s and Hsp70s, exported proteins containing a PHIST domain, genes coding for chaperones and their regulators, WD40 proteins as platforms of protein-protein interactions, components of exosomes, total palmitome of Plasmodium falciparum, phosphoproteome, the phosphoproteome of Plasmodium falciparum infected RBCs	ring-infected erythrocyte surface antigen	doi:10.1111/j.1365-2958.2005.04603.x ; doi:10.1038/nature04104; doi:10.1038/nature01097
PF3D7_1239200	AP2 domain transcription factor, putative	1.50312334402859	0.00293009088451186	12	DNA binding (GO:0003677), DNA-binding transcription factor activity (GO:0003700), binding (GO:0005488)	regulation of DNA-templated transcription (GO:0006355)	heterochromatin (GO:0000792), nucleus (GO:0005634)	GO:0005488	lysine acetylated proteins, DNA binding proteins with AP2 domain(s), P. falciparum genes harboring G-quadruplexes, proteins predicted to be involved in cell cycle regulatory network, functional orthologs of known cell cycle proteins in E. coli, S-nitrosylated proteins, nuclear proteome, phosphoproteome, transcription associated proteins implicated in the transcriptional machinery, transcription r…	transcription factor with AP2 domain(s)	doi: 10.1073/pnas.0801993105; doi:10.1038/nature04104; doi:10.1371/journal.ppat.1001165; doi:10.1093/nar/gkac176
PF3D7_1251200	coronin	-2.87705299398017	0.000134816339164722	12	actin binding (GO:0003779), actin filament binding (GO:0051015), protein binding (GO:0005515), binding (GO:0005488)	actin filament organization (GO:0007015), microtubule-based process (GO:0007017), response to xenobiotic stimulus (GO:0009410), cell motility (GO:0048870)	nucleus (GO:0005634), pellicle (GO:0020039)	GO:0020039; GO:0005488	protein kinase G-dependent phosphorylation in schizonts, potential pKG substrates in schizonts, PfWDR genes, actin and filaments, artemisinin - effect of drug on gene transcription, cGMP/PKG signalling in egress/invasion, nuclear proteome, phosphoproteome, phosphoproteome of the merozoite, protein-protein associations involving proteases, transcripts translationally regulated in asexual blood sta…	coronin	doi:10.1016/S0014-5793(98)01557-9 ; doi:10.1186/s12936-015-0801-5 ; doi:10.1073/pnas.1812317115 ; doi:10.1371/journal.ppat.1005710; doi:10.1038/nature01097
PF3D7_1301600	erythrocyte biding antigen-140	-2.74048062954708	3.45142950983575e-05	13	heparin binding (GO:0008201), host cell surface receptor binding (GO:0046789), binding (GO:0005488), host cell surface binding (GO:0046812)	obsolete pathogenesis (GO:0009405), leukocyte migration (GO:0050900), cell-cell adhesion (GO:0098609)	microneme (GO:0020009), plasma membrane (GO:0005886), integral component of membrane (GO:0016021)	GO:0020009; GO:0008201; GO:0005488; GO:0046812	domains of merozoite surface proteins, functional annotation of merozoite invasion-related proteins, protein-protein interactions between human erythrocytes and Plasmodium falciparum, parasite invasion ligands and human erythrocyte receptors, location of lipid raft-associated proteins, peptides with confirmed methylated lysine residues, merozoite ligands and their erythrocyte receptors, phosphopr…	erythrocyte binding antigen-140	doi:10.1046/j.1365-2958.2001.02484.x ; doi:10.1038/nature04104 ; doi:10.1016/j.molbiopara.2009.06.006 ; doi:10.1074/jbc.M113.450643 ; doi:10.1093/genetics/163.4.1327 ;doi:10.1371/journal.ppat.0030107 ; doi:10.1074/jbc.M112.409276 ; doi:10.1128/iai.00716-18 ; doi:10.1038/nm807 ; doi:10.1034/j.1399-3011.2003.00079.x ; doi:10.1371/journal.pone.0115437 ; doi:10.1182/blood-2002-10-3076 ; doi:10.1128/i…
PF3D7_1302100	gamete antigen 27/25	1.86038840076485	0.000154202969992435	13	protein dimerization activity (GO:0046983)		nucleus (GO:0005634)		differential proteome analysis under drug treatment, highest expressed genes based on mRNA abundance, nuclear proteome, phosphoproteome, proteins with ATPase activity, transcripts translationally regulated in asexual blood stages	gamete antigen 27/25	doi:10.1111/j.1365-2958.2009.06762.x; doi:10.1016/0166-6851(91)90201-g; doi:10.1016/0166-6851(96)02663-1; doi:10.1016/j.ijpara.2009.11.006; doi:10.1038/nsb899
PF3D7_1310700	PhIL1-interacting candidate PIC5	-2.99379599824874	2.82078296917889e-07	13	nucleic acid binding (GO:0003676), RNA binding (GO:0003723), protein binding (GO:0005515), binding (GO:0005488)	schizogony (GO:0020014), entry into host (GO:0044409)	nucleus (GO:0005634), inner membrane pellicle complex (GO:0070258)	GO:0070258; GO:0044409; GO:0005488	P. falciparum genes harboring G-quadruplexes, RNA binding proteins, functional orthologs of known cell cycle proteins in E. coli, total palmitome of Plasmodium falciparum, phosphoproteome, transcripts translationally regulated in assexual blood stages	RNA-binding protein, putative	doi: 10.1038/nature04104; doi:10.1371/journal.ppat.1009750; doi:10.1111/cmi.13341
PF3D7_1328700	Plasmodium RNA of unknown function RUF1	-2.52112840295688	0.0174031232956218	13							doi:10.1261/rna.751807
PF3D7_1332200	conserved Plasmodium protein, unknown function	-2.08993748728037	0.00747101888398547	13			nucleus (GO:0005634), apical complex (GO:0020007)		domains binding modified histones	conserved Plasmodium protein, unknown function	doi:10.1038/nature04104
PF3D7_1335300	reticulocyte binding protein 2 homologue b	-2.14516282709447	7.27241162372676e-05	13	heparin binding (GO:0008201), host cell surface receptor binding (GO:0046789), binding (GO:0005488), host cell surface binding (GO:0046812)	entry into host (GO:0044409)	rhoptry (GO:0020008), rhoptry neck (GO:1990225)	GO:0020008; GO:0044409; GO:0008201; GO:0005488; GO:0046812	domains of merozoite surface proteins, functional annotation of merozoite invasion-related proteins, parasite invasion ligands and human erythrocyte receptors, localization of lipid raft-associated proteins, merozoite ligands and their erythrocyte receptors, protein-protein associations involving proteases, subcellular localization of proteins involved in invasion	reticulocyte binding protein 2 homologue b	doi:10.1371/journal.pone.0017102 ; doi:10.1093/infdis/jix280 ; doi:10.1371/journal.ppat.1007436 ; doi:10.1128/iai.69.2.1084-1092.2001 ; doi:10.1111/j.1365-2958.2009.07040.x ; doi:10.1042/BJ20121694 ; doi:10.1038/s41598-020-58300-3 ; doi:10.1038/srep03178 ; doi:10.1093/emboj/cdg096 ; doi:10.1038/nature04104 ; doi:10.1128/iai.00122-07 ; doi:10.1111/mmi.13468
PF3D7_1335400	reticulocyte binding protein 2 homologue a	-2.62460278085051	2.36853464761491e-07	13	heparin binding (GO:0008201), host cell surface receptor binding (GO:0046812), binding (GO:0005488)	cell-cell adhesion (GO:0098609), entry into host (GO:0044409)	plasma membrane (GO:0005886), membrane (GO:0016020), integral component of membrane (GO:0016021), rhoptry neck (GO:1990225)	GO:0044409; GO:0008201; GO:0005488; GO:0046812	the ATG autophagic pathway, lysine acetylated proteins, domains of merozoite surface proteins, functions of the ER-Mitochondrial contacts, important interacting proteins, functional annotation of merozoite invasion-related proteins, arginine-methylated proteins, functional orthologs of known cell cycle proteins in E. coli, differential proteome analysis under drug treatment, gne gating and mRNA e…	reticulocyte binding protein 2 homologue a	doi: 10.1128/IAI.69.2.1084-1092.2001 ; PMID: 15964948 ; doi: 10.1128/IAI.70.10.5779-5789.2002 ; doi: 10.1093/emboj/cdg096 ; doi: 10.1371/journal.pone.0000645 ; doi: 10.1128/IAI.00201-11 ; doi: 10.1371/journal.ppat.1002075
PF3D7_1342600	myosin A	-2.16476561885265	0.00067636711617308	13	microfilament motor activity (GO:0000146), cytoskeletal motor activity (GO:0003774), actin binding (GO:0003779), protein binding (GO:0005515), ATP binding (GO:0005524), actin-dependent ATPase activity (GO:0030898), actin filament binding (GO:0051015), binding (GO:0005488)	actin filament organization (GO:0007015), vesicle transport along actin filament (GO:0030050), entry into host (GO:0044409), cell motility (GO:0048870)	nucleus (GO:0005634), cytoplasm (GO:0005737), cytosol (GO:0005829), plama membrane (GO:0005886), cell surface (GO:0009986), actin cytoskeleton (GO:0015629), myosin complex (GO:0016459), pellicle (GO:0020039), vesicle, perinuclear region of cytoplasm (GO:0048471), inner membrane pellicle complex (GO:0070258), cell periphery (GO:0071944)	GO:0016459; GO:0020039; GO:0070258; GO:0009986; GO:0044409; GO:0005488	lysine acetylaated proteins, O-glcNAcylated proteins identified by mass spectrometry, protein kinase G-dependent phosphorylation in schizonts, potential PKG substrates in schizonts, differentially expressed genes in different stages treated with cAMP, cGMP/PKG signalling in egress/invasion, functional orthologs of known cell cycle proteins in E. coli, network analysis of drCDC-UNK proteins and th…	myosin A	doi:10.1073/pnas.0510907103 ; doi:10.1242/jcs.111.13.1831 ; doi:10.1371/journal.ppat.1009007 ; doi:10.1091/mbc.11.4.1385 ; doi:10.1039/C9MO00124G ; doi:10.1074/jbc.M112.379842 ; doi:10.1038/s41467-019-11120-0 ; doi:10.1038/nature04104 ; doi:10.1074/jbc.M509807200 ; doi:10.1016/j.jmb.2005.11.027 ; doi:10.7554/eLife.60581 ; doi:10.1074/jbc.M117.802769
PF3D7_1370300	membrane associated histidine-rich protein 1	-2.45438811931816	7.27241162372676e-05	13	protein binding (GO:0005515), binding (GO:0005488)		Maurer´s cleft (GO:0020036), integral component of membrane (GO:0016021), extracellular vesicle (GO:1903561), host cell part (GO:0033643)	GO:1903561; GO:0033643; GO:0005488	established and putative Maurer´s clefts proteins, P. falciparum genes harboring G-quadruplexes, translocon of exported proteins (PTEX), model of PfEMP1 export, subcellular location of exported proteins, interactions between modified host cell membrane and endothelial cell, exported proteins of Plasmodium falciparum with confirmed location, exportome, total palmitome of Plasmodium falciparum, pho…	membrane associated histidine-rich protein	doi:10.1016/j.bbrc.2009.01.050 ; doi:10.1038/ncomms11659 ; doi:10.1074/jbc.M305851200 ; doi:10.1111/j.1365-2958.2008.06235.x
PF3D7_1371000	18S ribosomal RNA	-2.10930138316862	6.58461775511043e-23	13					structure and processing of pre rRNA	18S	doi:10.1261/rna.751807
PF3D7_1371200	5.8S ribosomal RNA	-1.54553804535594	0.00146513045581033	13					doxycycline - effect of drug on gene transcription, structure and processing of pre rRNA	5.8S	doi:10.1261/rna.751807
PF3D7_1371300	28S ribosomal RNA	-0.591079280338746	0.00866776343293283	13							doi:10.1261/rna.751807
PF3D7_1410400	rhoptry-associated protein 1	-1.3530905627266	0.035030171616145	14	RNA binding (GO:0003723), protein binding (GO:0005515), binding (GO:0005488)		nucleus (GO:0005634), symbiont-containing vacuole (GO:0020003), rhoptry (GO:0020008), food vacuole (GO:0020020), extracellular vesicle (GO:1903561), host cell part (GO:0033643)	GO:0020008; GO:1903561; GO:0033643; GO:0005488	lysine acetylated proteins, proteins of detergent-resistant membranes, food vacuole proteome, functional annotation of merozoite invasion-related proteins, top ranked surface exposed proteins, S-glutathionylated proteins, highest expressed genes based on mRNA abundance, location of lipid raft-associated proteins, merozoite protein complexes, S-nitrosylated proteins, nuclear proteome, total palmit…	rhoptry-associated protein 1	doi:10.1016/0166-6851(90)90103-s ; doi:10.1038/nature04104 ; doi:10.1016/j.bbamcr.2014.12.030 ; doi:10.1016/j.meegid.2010.03.013 ; doi:10.1371/journal.ppat.1000328 ; doi:10.1111/cmi.12733
PF3D7_1411000	conserved Plasmodium protein, unknown function	-2.19678355576577	0.0152245412245875	14					alternative splicing events confirmed by RNA-Seq	conserved Plasmodium protein, unknown function	doi:10.1111/j.1365-2958.2009.07026.x; doi:10.1038/nature01097
PF3D7_1418800	signal recognition particle RNA	-2.58920974001105	1.81170813053545e-06	14					geldanamycin - effect of drug on gene transcription	ncRNA	doi:10.1038/cddis.2013.521 ; doi:10.1261/rna.751807
PF3D7_1423300	serine/threonine protein phosphatase 7	-2.30662098136303	0.00928378000370259	14	protein serine/threonine phosphatase activity (GO:0004722), calcium ion binding (GO:0005509), protein binding (GO:0005515), hydrolase activity (GO:0016787)	protein dephosphorylation (GO:0006470)	nucleus (GO:0005634), cytoplasm (GO:0005737), cytosol (GO:0005829)		phosphatome - phosphatases of Plasmodium falciparum, nuclear proteome, putative organization of the kinetochore, phosphoproteome, the phosphoproteome of Plasmodium falciparum infected RBCs, protein phosphorylation, proteins involved in steps during passage through prophase, proteins with conserved phosphatase related superfamily domains	serine/threonine protein phosphatase 7	doi:10.1111/j.1365-2958.2006.05119.x ; doi:10.1186/1471-2164-9-412 ; doi:10.1016/j.chom.2014.05.020 ; doi:10.1016/s0166-6851(01)00260-2 ; doi:10.1186/1471-2199-5-6
PF3D7_API05700	small subunit ribosomal RNA	-1.32378568820543	6.86536544552918e-06	Apicoplast					genes of the apicoplast genome	small subunit ribosomal RNA	doi:10.1016/j.protis.2016.06.003
PF3D7_API05900	small subunit ribosomal RNA	-1.34906114815225	2.25107204393341e-06	Apicoplast							doi:10.1016/j.protis.2016.06.003
PF3D7_MIT01100	ribosomal RNA fragment RNA 1	-2.24952813981056	0.0281648072831117	Mitochondrial							doi:10.1371/journal.pone.0038320 ; doi:10.1016/j.parint.2011.02.001
PF3D7_MIT01400	cytochrome c oxidase subunit 3	-1.55754571578524	0.00386090353317471	Mitochondrial	cytochrome-c oxidase activity (GO:0004129), obsolete heme-copper terminal oxidase activity (GO:0015002)	aerobic electron transport chain (GO:0019646), respiratory electron transport chain (GO:0022904)	mitochondrion (GO:0005739), membrane (GO:0016020), integral component of membrane (GO:0016021)
PF3D7_MIT02100	cytochrome c oxidase subunit 1	-1.2438272679527	0.00666809837105726	Mitochondrial	cytochrome-c oxidase activity (GO:0004129), heme binding (GO:0020037), metal ion binding (GO:0046872)	oxidative phosphorylation (GO:0006119), aerobic respiration (GO:0009060), oxidation-reduction process (GO:0055114)	mitochondrial inner membrane (GO:0005743), integral component of membrane (GO:0016021), respirasome (GO:0070469)
PF3D7_MIT02300	cytochrome b	-1.88808645942064	0.00575607107124129	Mitochondrial	electron transfer activity (GO:0009055), oxidoreductase activity (GO:0016491), metal ion binding (GO:0046872)	response to xenobiotic stimulus (GO:0009410), respiratory electron transport chain (GO:0022904)	mitochondrial inner membrane (GO:0005743), membrane (GO:0016020), integral component of membrane (GO:0016021), respirasome (GO:0070469)				doi:10.1186/s12936-020-3126-y ; doi:10.1128/AAC.44.8.2100-2108.2000
PF3D7_MIT03200	large subunit ribosomal RNA fragment A	-2.41137093514357	1.36929930136562e-05	Mitochondrial							doi:10.1016/j.parint.2011.02.001
PF3D7_MIT04000	large subunit ribosomal RNA fragment E	-1.9038668735587	1.31458104095262e-05	Mitochondrial							doi:10.1371/journal.pone.0038320

## Sheet: DEG ordered by log2(FC)
GeneID	Name	log2(FC)	P-adj	Chromosome	Molecular Function	Biological Process	Cellular Component	GO enrichment	Malaria Parasite Metabolic Pathways/PlasmoDB
									Pathway	Activity	References
PF3D7_1302100	gamete antigen 27/25	1.86038840076485	0.000154202969992435	13	protein dimerization activity (GO:0046983)		nucleus (GO:0005634)		differential proteome analysis under drug treatment, highest expressed genes based on mRNA abundance, nuclear proteome, phosphoproteome, proteins with ATPase activity, transcripts translationally regulated in asexual blood stages	gamete antigen 27/25	doi:10.1111/j.1365-2958.2009.06762.x; doi:10.1016/0166-6851(91)90201-g; doi:10.1016/0166-6851(96)02663-1; doi:10.1016/j.ijpara.2009.11.006; doi:10.1038/nsb899
PF3D7_1239200	AP2 domain transcription factor, putative	1.50312334402859	0.00293009088451186	12	DNA binding (GO:0003677), DNA-binding transcription factor activity (GO:0003700), binding (GO:0005488)	regulation of DNA-templated transcription (GO:0006355)	heterochromatin (GO:0000792), nucleus (GO:0005634)	GO:0005488	lysine acetylated proteins, DNA binding proteins with AP2 domain(s), P. falciparum genes harboring G-quadruplexes, proteins predicted to be involved in cell cycle regulatory network, functional orthologs of known cell cycle proteins in E. coli, S-nitrosylated proteins, nuclear proteome, phosphoproteome, transcription associated proteins implicated in the transcriptional machinery, transcription r…	transcription factor with AP2 domain(s)	doi: 10.1073/pnas.0801993105; doi:10.1038/nature04104; doi:10.1371/journal.ppat.1001165; doi:10.1093/nar/gkac176
PF3D7_1016900	early transcribed membrane protein 10.3	1.47884285180955	0.00322364476437871	10			symbiont-containing vacuole membrane (GO:0020005), host cell part (GO:0033643)	GO:0033643	established and putative Maurer's clefts proteins, proteins of the parasitophorous vacuolar membrane, candidate genes related to virulence	early transcribed membrane protein 10.3	doi: 10.1128/EC.00336-09; doi:10.1111/j.1365-2958.2005.04983.x; doi:10.1091/mbc.e02-04-0240; doi:10.1073/pnas.0408442102
PF3D7_1014100	merozoite surface protein MSA180	-3.8771388914207	4.80753620827594e-07	10	protein binding (GO:0005515), binding (GO:0005488)	exit from host cell (GO:0035891), entry into host cell (GO:0044409)	cytoplasm (GO:0005737), cell surface (GO:0009986), symbiont-containing vacuole (GO:0020003), extracellular vesicle (GO:1903561), host cell part (GO:0033643)	GO:0033643; GO:0009986; GO:1903561; GO:0044409; GO:0005488	important interacting proteins, functional annotation of merozoite invasion-related proteins, subcellular localization of proteins involved in invasion	merozoite surface protein msa180, putative	doi: 10.1038/nature04104 ; doi:10.1186/s12936-017-1760-9 ; doi:10.1016/S0378-1119(01)00776-4 ; doi:10.1038/s41598-019-42366-9 ; doi:10.15252/embj.2020107226 ; doi:10.1038/s41598-021-98707-0
PF3D7_1038400	gametocyte-specific protein	-3.33988288667218	7.7793069233544e-05	10		gamete generation (GO:0007276)	integral component of membrane (GO:0016021), host cell cytoplasm (GO:0030430), host cell part (GO:0033643)	GO:0033643	established and putative Maurer´s clefts proteins, functional orthologs of known cell cycle proteins in E. coli, exportome	gametocyte-specific protein	doi:10.1038/nature04104
PF3D7_1035300	glutamate-rich protein GLURP	-3.27824159242017	9.82490448550302e-07	10	protein binding (GO:0005515), binding (GO:0005488)		cell surface (GO:0009986), symbiont-containing vacuole (GO:0020003), extracellular vesicle (GO:1903561), host cell part (GO:003643)	GO:0033643; GO:0009986; GO:1903561; GO:0005488	lysine acetylated proteins, important interacting proteins, functional annotation of merozoite invasion-related proteins, nuclear genes with apicoplast signal sequences, phosphoproteome, proteins released from infected cells during rupture, subcellular localization of proteins involved in invasion, transcripts translationally regulated in assexual blood stages, candidate genes related to virulence	glutamate-rich protein GLURP	doi:10.1186/s13071-018-2630-1 ; doi:10.1016/0166-6851(91)90135-S ; doi:10.1038/nature04104 ; doi:10.1093/infdis/jiw617 ; doi:10.1128/iai.66.1.11-17.1998
PF3D7_0731500	erythrocyte binding antigen-175	-3.1809594710719	1.08867585001813e-10	7	heparin binding (GO:0008201), host cell surface receptor binding (GO:0046789), binding (GO:0005488), host cell surface binding (GO:0046812)	obsolete pathogenesis (GO:0009405), entry into host (GO:0044409), modulation by symbiont oh host receptor-mediated signal transduction (GO:0075109)	integral component of membrane (GO:0016021), microneme (GO:0020009), extracellular vesicle (GO:1903561)	GO:1903561; GO:0020009; GO:0044409; GO:0008201; GO:0005488; GO:0046812	the ART proteome, proteins of detergent-resistant membranes, domains of merozoite surface proteins, functional annotation of merozoite invasion-related proteins, protein-protein interactions between human erythrocytes and Plasmodium falciparum, function orthologs of known cell cycle proteins in E. coli, parasite invasion ligands and human erythrocyte receptors, location of lipid raft-associated p…	erythrocyte binding antigen-175	doi: 10.1371/journal.ppat.1003390 ; doi: 10.1038/nature04104
PF3D7_1001500	early transcribed membrane protein 10.1	-3.04811323844953	1.36929930136562e-05	10			symbiont-containing vacuole membrane (GO:0020005), host cell part (GO:0033643)	GO:0033643	established and putative Maurer´s clefts proteins, proteins of the parasitophorous vacuolar membrane, nuclear genes with apicoplast signal sequences, gene expression affected by lumefantrine, the most 35 abundant proteins, phosphoproteome, proteome of the parasitophorous vacuole	early transcribed membrane protein 10.1	doi:10.1038/nature03188 ; doi:10.1111/j.1365-2958.2005.04983.x ; doi:10.1016/S0166-6851(02)00275-X ; doi:10.1073/pnas.0408442102
PF3D7_0725400	conserved Plasmodium protein, unknown function	-3.03968641671705	1.6483966871174e-08	7							doi: 10.1038/nature04104 ; doi:10.1016/S0378-1119(01)00776-4
PF3D7_1310700	PhIL1-interacting candidate PIC5	-2.99379599824874	2.82078296917889e-07	13	nucleic acid binding (GO:0003676), RNA binding (GO:0003723), protein binding (GO:0005515), binding (GO:0005488)	schizogony (GO:0020014), entry into host (GO:0044409)	nucleus (GO:0005634), inner membrane pellicle complex (GO:0070258)	GO:0070258; GO:0044409; GO:0005488	P. falciparum genes harboring G-quadruplexes, RNA binding proteins, functional orthologs of known cell cycle proteins in E. coli, total palmitome of Plasmodium falciparum, phosphoproteome, transcripts translationally regulated in assexual blood stages	RNA-binding protein, putative	doi: 10.1038/nature04104; doi:10.1371/journal.ppat.1009750; doi:10.1111/cmi.13341
PF3D7_1251200	coronin	-2.87705299398017	0.000134816339164722	12	actin binding (GO:0003779), actin filament binding (GO:0051015), protein binding (GO:0005515), binding (GO:0005488)	actin filament organization (GO:0007015), microtubule-based process (GO:0007017), response to xenobiotic stimulus (GO:0009410), cell motility (GO:0048870)	nucleus (GO:0005634), pellicle (GO:0020039)	GO:0020039; GO:0005488	protein kinase G-dependent phosphorylation in schizonts, potential pKG substrates in schizonts, PfWDR genes, actin and filaments, artemisinin - effect of drug on gene transcription, cGMP/PKG signalling in egress/invasion, nuclear proteome, phosphoproteome, phosphoproteome of the merozoite, protein-protein associations involving proteases, transcripts translationally regulated in asexual blood sta…	coronin	doi:10.1016/S0014-5793(98)01557-9 ; doi:10.1186/s12936-015-0801-5 ; doi:10.1073/pnas.1812317115 ; doi:10.1371/journal.ppat.1005710; doi:10.1038/nature01097
PF3D7_1035500	merozoite surface protein 6	-2.83923115366203	1.72483743789008e-06	10	protein binding (GO:0005515), protein-containing complex binding (GO:0044877), host cell surface binding(GO:0046812), binding (GO:0005488)	entry into host (GO:0044409)	cell surface (GO:0009986)	GO:0009986; GO:0044409; GO:0005488; GO:0046812	proteolytic processing of the MSP1/6/7 complex, MSP1 as na anchor in merozoite invasion, MSPDBL and MSP1 mediate merozoite invasion, function annotation of merozoite invasion-related proteins, P. falciparum genes harboring G-quadruplexes, merozoite ligands and their erythrocyte receptors, merozoite protein complexes, protein-protein associations involving proteases, subcellular localization of pr…	merozoite surface protein 6	doi:10.1016/S0166-6851(00)00350-9 ; doi:10.1016/S0166-6851(01)00336-X ; doi:10.1016/j.gene.2009.05.007 ; doi:10.1128/iai.72.4.2321-2328.2004 ; doi:10.1038/nature04104 ; doi:10.1074/jbc.M114.586495 ; doi:10.1016/j.peptides.2006.02.001 ; doi:10.1186/1475-2875-9-138
PF3D7_1102800	early transcribed membrane protein 11.2	-2.82829232141104	4.1256862959419e-16	11			symbiont-containing vacuole membrane (GO:0020005), host cell part (GO:0033643)	GO:0033643	established and putative Maurer´s clefts proteins, nuclear genes with apicoplast signal sequences, the 35 most abundant proteins, phosphoproteome of the merozoite, genes differentially expressed in severe malaria	early transcribed membrane protein 11.2	doi: 10.1038/nature04104 ; PMID: 16267556; doi:10.1038/nature01097; doi:10.1091/mbc.e02-04-0240; doi:10.1038/nature03188; doi:10.1016/s0166-6851(02)00275-x
PF3D7_1125800	kelch domain-containing protein, putative	-2.81673705321592	0.00150640016306072	11	protein binding (GO:0005515)				lysine acetylated proteins, functional orthologs of known cell cycle proteins in E. coli, effect of hyperoxia on gene expression, phosphoproteome, phosphoproteome of the merozoite, transcripts translationally regulated in asexual blood stages	kelch domain-containing protein, putative	doi:10.1038/nature04104; doi:10.1038/nature01097
PF3D7_1301600	erythrocyte biding antigen-140	-2.74048062954708	3.45142950983575e-05	13	heparin binding (GO:0008201), host cell surface receptor binding (GO:0046789), binding (GO:0005488), host cell surface binding (GO:0046812)	obsolete pathogenesis (GO:0009405), leukocyte migration (GO:0050900), cell-cell adhesion (GO:0098609)	microneme (GO:0020009), plasma membrane (GO:0005886), integral component of membrane (GO:0016021)	GO:0020009; GO:0008201; GO:0005488; GO:0046812	domains of merozoite surface proteins, functional annotation of merozoite invasion-related proteins, protein-protein interactions between human erythrocytes and Plasmodium falciparum, parasite invasion ligands and human erythrocyte receptors, location of lipid raft-associated proteins, peptides with confirmed methylated lysine residues, merozoite ligands and their erythrocyte receptors, phosphopr…	erythrocyte binding antigen-140	doi:10.1046/j.1365-2958.2001.02484.x ; doi:10.1038/nature04104 ; doi:10.1016/j.molbiopara.2009.06.006 ; doi:10.1074/jbc.M113.450643 ; doi:10.1093/genetics/163.4.1327 ;doi:10.1371/journal.ppat.0030107 ; doi:10.1074/jbc.M112.409276 ; doi:10.1128/iai.00716-18 ; doi:10.1038/nm807 ; doi:10.1034/j.1399-3011.2003.00079.x ; doi:10.1371/journal.pone.0115437 ; doi:10.1182/blood-2002-10-3076 ; doi:10.1128/i…
PF3D7_0202500	early transcribed membrane protein 2	-2.67005465049817	1.88611469597024e-06	2			nucleus (GO:0005634), symbiont-containing vacuole membrane (GO:00200005), extracellular vesicle (GO:1903561), host cell part (GO:0033643)	GO:0033643; GO:1903561	lysine acetylated proteins, established and putative Maurer´s clefts proteins, proteins of the parasitophorous vacuolar membrane, characteristics of Plasmodium falciparum export proteins that remodel infected erythrocyte, functional orthologs of known cell cycle proteins in E. coli, differential proteome analysis under drug treatment, exportome -compiled from varios sources, the 35 most abundant …	early transcribed membrane protein 2	doi:10.1038/nature04104 ; doi:10.1038/nature01097 ; doi:10.1128/ec.00340-08 ; doi:10.1073/pnas.0408442102 ; doi:10.1111/j.1365-2958.2005.04983.x ; doi:10.1016/S0166-6851(02)00275-X
PF3D7_1335400	reticulocyte binding protein 2 homologue a	-2.62460278085051	2.36853464761491e-07	13	heparin binding (GO:0008201), host cell surface receptor binding (GO:0046812), binding (GO:0005488)	cell-cell adhesion (GO:0098609), entry into host (GO:0044409)	plasma membrane (GO:0005886), membrane (GO:0016020), integral component of membrane (GO:0016021), rhoptry neck (GO:1990225)	GO:0044409; GO:0008201; GO:0005488; GO:0046812	the ATG autophagic pathway, lysine acetylated proteins, domains of merozoite surface proteins, functions of the ER-Mitochondrial contacts, important interacting proteins, functional annotation of merozoite invasion-related proteins, arginine-methylated proteins, functional orthologs of known cell cycle proteins in E. coli, differential proteome analysis under drug treatment, gne gating and mRNA e…	reticulocyte binding protein 2 homologue a	doi: 10.1128/IAI.69.2.1084-1092.2001 ; PMID: 15964948 ; doi: 10.1128/IAI.70.10.5779-5789.2002 ; doi: 10.1093/emboj/cdg096 ; doi: 10.1371/journal.pone.0000645 ; doi: 10.1128/IAI.00201-11 ; doi: 10.1371/journal.ppat.1002075
PF3D7_1418800	signal recognition particle RNA	-2.58920974001105	1.81170813053545e-06	14					geldanamycin - effect of drug on gene transcription	ncRNA	doi:10.1038/cddis.2013.521 ; doi:10.1261/rna.751807
PF3D7_0525800	inner membrane complex protein 1g, putative	-2.57130856001688	8.09698784407776e-06	5			inner membrane pellicle complex (GO:0070258)	GO:0070258	protein kinase G-dependent phosphorylation in schizonts, top ranked surface exposed proteins, differentially expressed genes in different stages treated with cAMP, cGMP/PKG signalling in egress/invasion, functional orthologs of known cell cycle proteins in E. coli, control of microtubule assembly, components of the linear motor responsible for merozoite motility in invasion, peptides with confirm…	inner membrane complex protein 1g, putative	doi:10.1083/jcb.200406068 ; doi:10.1038/nature04104 ; doi:10.1038/nbt.1597
PF3D7_1328700	Plasmodium RNA of unknown function RUF1	-2.52112840295688	0.0174031232956218	13							doi:10.1261/rna.751807
PF3D7_1370300	membrane associated histidine-rich protein 1	-2.45438811931816	7.27241162372676e-05	13	protein binding (GO:0005515), binding (GO:0005488)		Maurer´s cleft (GO:0020036), integral component of membrane (GO:0016021), extracellular vesicle (GO:1903561), host cell part (GO:0033643)	GO:1903561; GO:0033643; GO:0005488	established and putative Maurer´s clefts proteins, P. falciparum genes harboring G-quadruplexes, translocon of exported proteins (PTEX), model of PfEMP1 export, subcellular location of exported proteins, interactions between modified host cell membrane and endothelial cell, exported proteins of Plasmodium falciparum with confirmed location, exportome, total palmitome of Plasmodium falciparum, pho…	membrane associated histidine-rich protein	doi:10.1016/j.bbrc.2009.01.050 ; doi:10.1038/ncomms11659 ; doi:10.1074/jbc.M305851200 ; doi:10.1111/j.1365-2958.2008.06235.x
PF3D7_MIT03200	large subunit ribosomal RNA fragment A	-2.41137093514357	1.36929930136562e-05	Mitochondrial							doi:10.1016/j.parint.2011.02.001
PF3D7_1126700	conserved Plasmodium protein, unknown function	-2.40590410526714	0.00329871465902893	11	microtubule binding (GO:0008017), dynein light intermediate chain binding (GO:0051959)	cytoskeleton-dependent intracellular transport (GO:0030705), cytoplasmic microtubule organization (GO:0031122)	cytoplasm (GO:0005737), centrosome (GO:0005813)		the ATG autophagic pathway, important interacting proteins, potential PKG substrates in schizonts, peptides with confirmed methylated lysine residues	autophagy-related protein 23	doi:10.1038/nature04104; doi:10.1038/nature01097
PF3D7_0302200	cytoadherence linked asexual protein 3.2	-2.34693227607326	5.21991418214694e-05	3	cell adhesion molecule binding (GO:0050839), protein binding (GO:000515), anion channel activity (GO:0005253), binding (GO:0005488)	cytoadherence to microvasculature mediated by symbiont protein (GO:0020035)	nucleus (GO:0005634), host cell plasma membrane (GO:00020002), rhoptry (GO:0020008), host cell part (GO:0033643)	GO:0020008; GO:0033643; GO:0005488; GO:0005253	lsyine acetylated proteins, proteins of detergent-resistant membranes, estabilished and putative Maurer´s clefts proteins, possible reasons for increased permeability of host cell membrane, functional annotation of maerozoite invasion-related proteins, top ranked surface exposed proteins, epigenetic switching mechanisms, components of exosomes, exported proteins of Plasmodium falciparum with conf…	cytoadherence linked asexual protein 3.2	doi:10.1111/j.1365-2958.2011.07572.x ; doi:10.1038/22964 ; doi:10.1371/journal.ppat.1008363 ; doi:10.1016/S0166-6851(01)00378-4 ; doi:10.1016/j.molbiopara.2005.05.003 ; doi:10.1016/j.cell.2011.05.002 ; doi:10.1073/pnas.040561197 ; doi:10.1016/j.parint.2006.11.001 ; doi:10.1016/j.molbiopara.2007.11.004
PF3D7_0818100	C3H1-type zinc finger protein CZIF2	-2.31780737624744	0.0076198343488173	8	metal ion binding (GO:0046872)		cytosol (GO:0005829), membrane (GO:0016020)		chloramphenicol - effect of drug on gene transcription, methotrexate - effect of drug on gene transcription, RNA binding proteins, artemisinin - effect of drug on gene transcription, transcription associated proteins implicated in the transcriptional machinery, transcription related proteins encoding genes	zinc finger protein, putative	doi:10.1016/j.ijpara.2022.09.008
PF3D7_0402300	reticulocyte binding protein homologue 1	-2.31714413428635	0.0135148313857879	4	heparin binding (GO:0008201), host cell surface receptor binding (GO:0046789), binding (GO:0005488), host cell surface binding(GO:0046812)	cell-cell adhesion (GO:0098609)	integral component of membrane (GO:0016021), apical complex (GO:0020007), rhoptry (GO:0020008)	GO:0020008; GO:0008201; GO:0005488; GO:0046812	lysine acetylated proteins, domains of merozoite surface proteins, functional annotation of merozoite invasion-related proteins, parasite invasion ligands and human erythrocyte receptors, location of lipid raft-associated proteins, peptides with confirmed methylated lysine residues, merozoite ligands, their erythrocyte receptors, subcellular localization of proteins involved in invasion, transcri…	reticulocyte binding protein homologue 1 normocyte binding protein 1	doi:10.1111/j.1365-2958.2004.04388.x ; doi:10.1371/journal.pone.0000645 ; doi:10.1038/srep03178 ; doi:10.1084/jem.194.11.1571 ; doi:10.1111/j.1462-5822.2009.01358.x
PF3D7_1149200	ring-infected erythrocyte surface antigen	-2.31485868272064	0.0111167975994693	11			Maurer's cleft (GO:0020036), host cell part (GO:0033643)	GO:0033643	proteins of detergent-resistant membranes, localization and function of some Hsp40s and Hsp70s, exported proteins containing a PHIST domain, genes coding for chaperones and their regulators, WD40 proteins as platforms of protein-protein interactions, components of exosomes, total palmitome of Plasmodium falciparum, phosphoproteome, the phosphoproteome of Plasmodium falciparum infected RBCs	ring-infected erythrocyte surface antigen	doi:10.1111/j.1365-2958.2005.04603.x ; doi:10.1038/nature04104; doi:10.1038/nature01097
PF3D7_1423300	serine/threonine protein phosphatase 7	-2.30662098136303	0.00928378000370259	14	protein serine/threonine phosphatase activity (GO:0004722), calcium ion binding (GO:0005509), protein binding (GO:0005515), hydrolase activity (GO:0016787)	protein dephosphorylation (GO:0006470)	nucleus (GO:0005634), cytoplasm (GO:0005737), cytosol (GO:0005829)		phosphatome - phosphatases of Plasmodium falciparum, nuclear proteome, putative organization of the kinetochore, phosphoproteome, the phosphoproteome of Plasmodium falciparum infected RBCs, protein phosphorylation, proteins involved in steps during passage through prophase, proteins with conserved phosphatase related superfamily domains	serine/threonine protein phosphatase 7	doi:10.1111/j.1365-2958.2006.05119.x ; doi:10.1186/1471-2164-9-412 ; doi:10.1016/j.chom.2014.05.020 ; doi:10.1016/s0166-6851(01)00260-2 ; doi:10.1186/1471-2199-5-6
PF3D7_MIT01100	ribosomal RNA fragment RNA 1	-2.24952813981056	0.0281648072831117	Mitochondrial							doi:10.1371/journal.pone.0038320 ; doi:10.1016/j.parint.2011.02.001
PF3D7_1035900	merozoites-associated armadillo repeats protein	-2.22461074019446	0.00127486721402407	10	RNA binding (GO:0003723)	entry into host (GO:0044409)	cell surface (GO:0009986), apical part of cell (GO:0045177)	GO:0009986; GO:0044409	food vacuole proteome, tafenoquine - effect of drug on gene transcription, chloroquine - effect of drug on gene transcription	probable protein, unknown function	doi:10.1038/nature04104 ; doi:10.3389/fimmu.2020.00505
PF3D7_1411000	conserved Plasmodium protein, unknown function	-2.19678355576577	0.0152245412245875	14					alternative splicing events confirmed by RNA-Seq	conserved Plasmodium protein, unknown function	doi:10.1111/j.1365-2958.2009.07026.x; doi:10.1038/nature01097
PF3D7_0112300	18S ribosomal RNA	-2.1679261032465	4.76935700238685e-24	1					structure and processing of pre rRNA	18S ribosomal RNA	doi:10.1261/rna.751807
PF3D7_1342600	myosin A	-2.16476561885265	0.00067636711617308	13	microfilament motor activity (GO:0000146), cytoskeletal motor activity (GO:0003774), actin binding (GO:0003779), protein binding (GO:0005515), ATP binding (GO:0005524), actin-dependent ATPase activity (GO:0030898), actin filament binding (GO:0051015), binding (GO:0005488)	actin filament organization (GO:0007015), vesicle transport along actin filament (GO:0030050), entry into host (GO:0044409), cell motility (GO:0048870)	nucleus (GO:0005634), cytoplasm (GO:0005737), cytosol (GO:0005829), plama membrane (GO:0005886), cell surface (GO:0009986), actin cytoskeleton (GO:0015629), myosin complex (GO:0016459), pellicle (GO:0020039), vesicle, perinuclear region of cytoplasm (GO:0048471), inner membrane pellicle complex (GO:0070258), cell periphery (GO:0071944)	GO:0016459; GO:0020039; GO:0070258; GO:0009986; GO:0044409; GO:0005488	lysine acetylaated proteins, O-glcNAcylated proteins identified by mass spectrometry, protein kinase G-dependent phosphorylation in schizonts, potential PKG substrates in schizonts, differentially expressed genes in different stages treated with cAMP, cGMP/PKG signalling in egress/invasion, functional orthologs of known cell cycle proteins in E. coli, network analysis of drCDC-UNK proteins and th…	myosin A	doi:10.1073/pnas.0510907103 ; doi:10.1242/jcs.111.13.1831 ; doi:10.1371/journal.ppat.1009007 ; doi:10.1091/mbc.11.4.1385 ; doi:10.1039/C9MO00124G ; doi:10.1074/jbc.M112.379842 ; doi:10.1038/s41467-019-11120-0 ; doi:10.1038/nature04104 ; doi:10.1074/jbc.M509807200 ; doi:10.1016/j.jmb.2005.11.027 ; doi:10.7554/eLife.60581 ; doi:10.1074/jbc.M117.802769
PF3D7_1148600	18S ribosomal RNA	-2.1546266159155	1.22781706159026e-23	11					methotrexate - effect of drug on gene transcription	rRNA	doi:10.1261/rna.751807
PF3D7_0831800	histidine-rich protein II	-2.15282545321613	0.000139856876174645	8		heme catabolic process (GO:0042167)	cytoplasm (GO:0005737), food vacuole (GO:0020020), Maurer´s cleft (GO:0020036), host cell cytoplasm (GO:0030430), host cell membrane (GO:0033644), host cell part (GO:0033643)	GO:0033643	cloroquine - effect of drug on gene transcription, exportome, hemoglobin digestion, properties of proteins exported to erythrocyte, subcellular localization of exported proteins, candidate genes related to virulence	histidine-rich protein II	doi:10.1086/432010 ; doi:10.1371/journal.pone.0008091 ; doi:10.1016/j.actatropica.2012.09.015 ; doi:10.1186/s12936-020-03328-z ; doi:10.1073/pnas.83.16.6065 ; doi:10.1126/science.271.5246.219 ; doi:10.1128/mbio.00617-16 ;doi:10.1186/s13104-019-4361-6 ; doi:10.1186/1475-2875-13-34 ; doi:10.1371/journal.pone.0112087 ; doi:10.1371/journal.pone.0126805 ; doi:10.1038/s41598-018-35471-8 ; doi:10.1038/s…
PF3D7_1017500	myosin essential light chain ELC	-2.14697083383086	0.0173683736549454	10	protein binding (GO:0005515), binding (GO:0005488)		nucleus (GO:0005634), cell surface (GO:0009986), inner membrane pellicle complex (GO:0070258)	GO:0070258; GO:0009986; GO:0005488	functional orthologs of known cell cycle proteins in E. coli, differential proteome analysis under drug treatment, genes for which expression is significantly correlated with coma score, effect of hyperoxia on gene expression, molecular motor prototypes	myosin essential light chain ELC	doi:10.1038/nature04104 ; doi:10.1074/jbc.M117.802769 ; doi:10.1074/jbc.M117.813972
PF3D7_1335300	reticulocyte binding protein 2 homologue b	-2.14516282709447	7.27241162372676e-05	13	heparin binding (GO:0008201), host cell surface receptor binding (GO:0046789), binding (GO:0005488), host cell surface binding (GO:0046812)	entry into host (GO:0044409)	rhoptry (GO:0020008), rhoptry neck (GO:1990225)	GO:0020008; GO:0044409; GO:0008201; GO:0005488; GO:0046812	domains of merozoite surface proteins, functional annotation of merozoite invasion-related proteins, parasite invasion ligands and human erythrocyte receptors, localization of lipid raft-associated proteins, merozoite ligands and their erythrocyte receptors, protein-protein associations involving proteases, subcellular localization of proteins involved in invasion	reticulocyte binding protein 2 homologue b	doi:10.1371/journal.pone.0017102 ; doi:10.1093/infdis/jix280 ; doi:10.1371/journal.ppat.1007436 ; doi:10.1128/iai.69.2.1084-1092.2001 ; doi:10.1111/j.1365-2958.2009.07040.x ; doi:10.1042/BJ20121694 ; doi:10.1038/s41598-020-58300-3 ; doi:10.1038/srep03178 ; doi:10.1093/emboj/cdg096 ; doi:10.1038/nature04104 ; doi:10.1128/iai.00122-07 ; doi:10.1111/mmi.13468
PF3D7_1026600	conserved Plasmodium protein, unknown function	-2.13491920250539	0.00572763883298416	10			nucleus (GO:0005634)		protein-protein associations involving proteases, candidate genes related to virulence	conserved Plasmodium protein, unknown function	doi:10.1038/nature04104; doi:10.1038/nature01097
PF3D7_1371000	18S ribosomal RNA	-2.10930138316862	6.58461775511043e-23	13					structure and processing of pre rRNA	18S	doi:10.1261/rna.751807
PF3D7_1332200	conserved Plasmodium protein, unknown function	-2.08993748728037	0.00747101888398547	13			nucleus (GO:0005634), apical complex (GO:0020007)		domains binding modified histones	conserved Plasmodium protein, unknown function	doi:10.1038/nature04104
PF3D7_0613900	myosin E, putative	-2.05077629176199	0.00572763883298416	6	microfilament motor activity (GO:0000146), cytoskeletal motor activity (GO:0003774), actin binding (GO:0003779), ATP binding (GO:0005524), actin-dependent ATPase activity (GO:0030898), actin filament binding (GO:0051015), binding (GO:0005488)	actin filament organization (GO:0007015), vesicle transport along actin filament (GO:0030050), cell motility (GO:0048870)	nucleus (GO:0005634), cytoplasm (GO:0005737), cytosol (GO:0005829), actin cytoskeleton (GO:0015629), myosin complex (GO:0016459), vesicle (GO:0031982), basal part of cell (GO:0045178)	GO:0016459; GO:0005488	lysine acetylated proteins, protein kinase G-dependent phosphorylation in schizonts, P. falciparum genes harboring G-quadruplexes, network analysis of drCDC-UNK proteins and their potential protein interactions, molecular motor prototypes, nuclear proteome, total palmitome of Plasmodium falciparum, phosphoproteome of the merozoite, phosphoproteome, genes differentially expressed in severe malaria…	myosin E, putative	doi:10.1002/cm.20055 ; doi:10.1038/nature04104 ; doi:10.1111/cmi.13082
PF3D7_1003600	inner membrane complex protein 1c, putative	-2.05050131157193	0.0192247358297199	10	protein binding (GO:0005515), binding (GO:0005488)		nucleus (GO:0005634), inner membrane pellicle complex (GO:0070258)	GO:0070258; GO:0005488	important interacting proteins, components of the linear motor responsible for merozoite motility in invasion, peptides with confirmed methylated lysine residues, nuclear proteome, total palmitome of Plasmodium falciparum, phosphoproteome, phosphoproteome of the merozoite, transcripts translationally regulated in asexual blood stages	inner membrane complex protein 1c, putative	doi:10.1038/nbt.1597 ; doi:10.1083/jcb.200406068; doi:10.1007/s00436-014-4093-4 ; doi:10.1093/molbev/msn070 ; doi:10.1038/nature04104
PF3D7_0104900	Rnase MRP	-1.9548668189911	0.0135148313857879	1					various features of C/D and H/ACA snoRNAs	RNase MRP	doi:10.1261/rna.751807
PF3D7_0730800	Plasmodium exported protein, unknown function	-1.9500982562587	0.0491632363731409	7			host cell (GO:0043657)		lysine acetylated proteins, functional annotation of merozoite invasion-related proteins, functional orthologs of known cell cycle proteins in E. coli, exportome, phosphoproteome of the merozoite, phosphoproteome, protein-protein associations involving proteases, transcriptomic response of dihydroartemisinin (DHA) treated K1 strain trophozoites, candidate genes related to virulence	Plasmodium exported protein, unknown function	doi:10.1186/gb-2006-7-2-r12 ; doi:10.1038/nature04104
PF3D7_MIT04000	large subunit ribosomal RNA fragment E	-1.9038668735587	1.31458104095262e-05	Mitochondrial							doi:10.1371/journal.pone.0038320
PF3D7_MIT02300	cytochrome b	-1.88808645942064	0.00575607107124129	Mitochondrial	electron transfer activity (GO:0009055), oxidoreductase activity (GO:0016491), metal ion binding (GO:0046872)	response to xenobiotic stimulus (GO:0009410), respiratory electron transport chain (GO:0022904)	mitochondrial inner membrane (GO:0005743), membrane (GO:0016020), integral component of membrane (GO:0016021), respirasome (GO:0070469)				doi:10.1186/s12936-020-3126-y ; doi:10.1128/AAC.44.8.2100-2108.2000
PF3D7_0531600	18S ribosomal RNA	-1.8678432643394	6.58461775511043e-23	5					structure and processing of pre rRNA	18S ribosomal RNA	doi:10.1261/rna.751807
PF3D7_0725600	18S ribosomal RNA	-1.85273540170002	6.58461775511043e-23	7					structure and processing of pre rRNA	18S ribosomal RNA	doi:10.1261/rna.751807
PF3D7_0501600	rhoptry-associated protein 2	-1.84634420276389	0.000296120738252012	5	RNA binding (GO:0003723), protein binding (GO:0005515), binding (GO:0005488)	entry into host (GO:0044409)	nucleus (GO:0005634), rhoptry (GO:0020008), food vacuole (GO:0020020), extracellular vesicle (GO:1903561)	GO:0020008; GO:1903561; GO:0044409; GO:0005488	proteins of detergent-resistant membranes, food vacuole proteome, functional annotation of merozoite invasion-related proteins, top ranked surface exposed proteins, components of exosomes, exportome, S-glutathionylated proteins, highest expressed genes based on mRNA abundance, location of lipid raft-associated proteins, peptides with confirmed methylated lysine residues, proteins of erythrocyte-d…	rhoptry-associated protein 2	doi:10.1182/blood-2017-08-802918 ; doi:10.1093/emboj/19.11.2435 ; doi:10.1016/0166-6851(96)02730-2 ; doi:10.1016/0166-6851(92)90251-E
PF3D7_1035200	S-antigen	-1.80273173494667	2.36853464761491e-07	10			vacuole (GO:0005773), symbiont-containing vacuole (GO:0020003), host cell part (GO:0033643)	GO:0033643	The ART proteome, functional annotation of merozoite invasion-related proteins, differentially expressed genes in different stages treated with cAMP, exportome -compiled from various sources, phosphoproteome, properties exported to erythrocyte, protein-protein associations involving proteases, subcellular localization of proteins involves in invasion.	S-antigen	doi: 10.1016/0166-6851(92)90161-c
PF3D7_0102500	erythrocyte binding antigen-181	-1.78695926369775	0.00993069216009424	1	heparin binding (GO:0008201), sialic acid binding (GO:0033691), host cell surface receptor binding (GO:0046789), binding (GO:0005488)	obsolete pathogenesis (GO:0009405), entry into host (GO:0044409), cell-cell adhesion (GO:0098609)	integral component of membrane (GO:0016021), microneme (GO:0020009), extracellular vesicle (GO:1903561)	GO:1903561; GO:0044409; GO:0008201; GO:0005488	domains of merozoite surface proteins, important interacting proteins, functional annotation of merozoite invasion-related proteins, protein-protein Interactions between human erythrocytes and Plasmodium falciparum, components of exosomes, exportome, parasite invasion ligands and human erythrocyte receptors, location of lipid raft-associated proteins, merozoite ligands, their erythrocyte receptor…	erythrocyte binding antigen-181	doi:10.1073/pnas.0307318101 ; doi:10.1073/pnas.0510648103 ; doi:10.1128/IAI.01331-08 ; doi:10.1074/jbc.M211446200 ; doi:10.1016/j.biochi.2005.01.005 ; doi:10.1038/srep03178
PF3D7_0531800	5.8S ribosomal RNA	-1.70829882199039	4.26974226844486e-10	5					structure and processing of pre rRNA	5.8S ribosomal RNA	doi:10.1261/rna.751807
PF3D7_0725800	5.8S ribosomal RNA	-1.70376825459544	4.26974226844486e-10	7					structure and processing of pre rRNA	5.8S ribosomal RNA	doi:10.1261/rna.751807
PF3D7_MIT01400	cytochrome c oxidase subunit 3	-1.55754571578524	0.00386090353317471	Mitochondrial	cytochrome-c oxidase activity (GO:0004129), obsolete heme-copper terminal oxidase activity (GO:0015002)	aerobic electron transport chain (GO:0019646), respiratory electron transport chain (GO:0022904)	mitochondrion (GO:0005739), membrane (GO:0016020), integral component of membrane (GO:0016021)
PF3D7_1148620	5.8S ribosomal RNA	-1.55554770203662	0.00124283004819218	11							doi:10.1261/rna.751807
PF3D7_1371200	5.8S ribosomal RNA	-1.54553804535594	0.00146513045581033	13					doxycycline - effect of drug on gene transcription, structure and processing of pre rRNA	5.8S	doi:10.1261/rna.751807
PF3D7_0302500	cytoadherence linked asexual protein 3.1	-1.46040101611165	0.000822402083907639	3	RNA binding (GO:0003723), anion channel activity (GO:0005253), protein binding (GO:000515), cell adhesion molecule binding (GO:0050839), binding (GO:0005488)	cytoadherence to microvasculature mediated by symbiont protein (GO:0020035)	nucleus (GO:0005634), host cell plasma membrane (GO:0020002), rhoptry (GO:0020008), host cell cytoplasm (GO:0030430), extracellular vesicle (GO:1903561), host cell part (GO:0033643)	GO:0020008; GO:1903561; GO:0033643; GO:0005488; GO:0005253	proteins of detergent-resistant membranes, parasite proteins co-exported with Hsp70x, established and putative Maurer's clefts proteins, possible reasons for increased permeability of host cell membrane, functional annotation of merozoite invasion-related proteins, chaperones associate with proteins in various iRBC locations, functional orthologs of known cell cycle proteins in E. coli, Interacti…	cytoadherence linked asexual protein 3.1	doi:10.1016/S0166-6851(01)00378-4 ; doi:10.1371/journal.pone.0157390 ; doi:10.1128/mbio.01354-20 ; doi:10.1073/pnas.040561197 ; doi:10.1371/journal.ppat.1008363 ; doi:10.1016/j.molbiopara.2005.05.003 ; https://doi.org/10.1038/nature04104 ; doi:0.1128/mbio.02293-17 ; doi:10.1038/22964 ; doi:10.1016/j.parint.2006.11.001 ; doi:10.1111/j.1365-2958.2011.07572.x ; doi:10.1016/j.molbiopara.2007.11.004 ;…
PF3D7_0112700	28S ribosomal RNA	-1.42135316526633	3.41362684551845e-11	1					structure and processing of pre rRNA	28S ribosomal RNA	doi:10.1261/rna.751807
PF3D7_0707300	rhoptry-associated membrane antigen	-1.38260365791617	0.00572763883298416	7	protein binding (GO:0005515), binding (GO:0005488)	cellular protein localization (GO:0034613), entry into host (GO:0044409), cell-cell adhesion (GO:0098609)	nucleus (GO:0005634), endoplasmic reticulum (GO:0005783), Golgi apparatus (GO:0005794), symbiont-containing vacuole (GO:0020003), rhoptry (GO:0020008), anchored component of membrane (GO:0031225), rhoptry membrane (GO:0033016), membrane raft (GO:0045121), protein binding (GO:0005515), host cell part (GO:0033643)	GO:0033643; GO:0020008; GO:0044409; GO:0005488	lysine acetylated proteins, proteins of detergent-resistant membranes, genes coding for GPI-anchored membrane proteins, functional annotation of merozoite invasion-related proteins, exportome, Location of lipid raft-associated proteins, merozoite protein complexes, S-nitrosylated proteins, nuclear proteome, total palmitome of Plasmodium falciparum, phosphoproteome, phosphoproteome of the merozoit…	rhoptry-associated membrane antigen	doi:10.1128/IAI.72.6.3325-3330.2004 ; doi:10.1016/j.molbiopara.2004.05.018 ; doi:10.1074/jbc.M307859200 ; doi:10.1371/journal.ppat.1008049 ; doi:10.3389/fcimb.2020.605367
PF3D7_1410400	rhoptry-associated protein 1	-1.3530905627266	0.035030171616145	14	RNA binding (GO:0003723), protein binding (GO:0005515), binding (GO:0005488)		nucleus (GO:0005634), symbiont-containing vacuole (GO:0020003), rhoptry (GO:0020008), food vacuole (GO:0020020), extracellular vesicle (GO:1903561), host cell part (GO:0033643)	GO:0020008; GO:1903561; GO:0033643; GO:0005488	lysine acetylated proteins, proteins of detergent-resistant membranes, food vacuole proteome, functional annotation of merozoite invasion-related proteins, top ranked surface exposed proteins, S-glutathionylated proteins, highest expressed genes based on mRNA abundance, location of lipid raft-associated proteins, merozoite protein complexes, S-nitrosylated proteins, nuclear proteome, total palmit…	rhoptry-associated protein 1	doi:10.1016/0166-6851(90)90103-s ; doi:10.1038/nature04104 ; doi:10.1016/j.bbamcr.2014.12.030 ; doi:10.1016/j.meegid.2010.03.013 ; doi:10.1371/journal.ppat.1000328 ; doi:10.1111/cmi.12733
PF3D7_API05900	small subunit ribosomal RNA	-1.34906114815225	2.25107204393341e-06	Apicoplast							doi:10.1016/j.protis.2016.06.003
PF3D7_1010300	succinate dehydrogenase subunit 4, putative	-1.34571143022855	0.0274299018795152	10					artemisinin - effect of drug on gene transcription, differentially expressed genes in different stages treated with cAMP, single gene/enzyme deletions predicted to cause impairment of metabolic networks, mitochondrial electron flow, phosphoproteome of the merozoite	succinate dehydrogenase subunit 4, putative	doi:10.1016/j.mito.2009.08.004; doi:10.1038/nature01097
PF3D7_API05700	small subunit ribosomal RNA	-1.32378568820543	6.86536544552918e-06	Apicoplast					genes of the apicoplast genome	small subunit ribosomal RNA	doi:10.1016/j.protis.2016.06.003
PF3D7_0918500	telomerase RNA	-1.26926953820653	5.50000876794543e-05	9					various features of C/D and H/ACA snoRNAs, secondary structure of spliceosomal RNAs, telomerase and some telomerase associated proteins	telomerase RNA	doi: 10.1261/rna.751807 ; doi:10.1371/journal.pone.0108930
PF3D7_MIT02100	cytochrome c oxidase subunit 1	-1.2438272679527	0.00666809837105726	Mitochondrial	cytochrome-c oxidase activity (GO:0004129), heme binding (GO:0020037), metal ion binding (GO:0046872)	oxidative phosphorylation (GO:0006119), aerobic respiration (GO:0009060), oxidation-reduction process (GO:0055114)	mitochondrial inner membrane (GO:0005743), integral component of membrane (GO:0016021), respirasome (GO:0070469)
PF3D7_0830200	28S ribosomal RNA	-1.1723216343404	6.07367704025616e-07	8
PF3D7_0801100	28S ribosomal RNA	-1.1396288370774	0.000886452413073052	8					P. falciparum genes harboring G-quadruplexes, structure and processing of pre rRNA	28S ribosomal RNA	doi:10.1261/rna.751807
PF3D7_0726000	28S ribosomal RNA	-1.09625980554566	1.25366548455574e-09	7					structure and processing of pre rRNA	28S ribosomal RNA	doi:10.1261/rna.751807
PF3D7_0532000	28S ribosomal RNA	-1.09359913587526	1.27653440311522e-09	5					structure and processing of pre rRNA	28S ribosomal RNA	doi:10.1261/rna.751807
PF3D7_1012400	hypoxanthine-guanine phosphoribosyltransferase	-0.63278395723224	0.0408714078876836	10	nucleotide binding (GO:0000166), magnesium ion binding (GO:0000287), RNA binding (GO:0003723), hypoxanthine phosphoribosyltransferase activity (GO:0004422), guanine phosphoribosyltransferase activity (GO:0052657), binding (GO:0005488)	purine ribonucleoside salvage (GO:0006166), adenine salvage (GO:0006168), guanine salvage (GO:0006178), nucleoside metabolic process (GO:0009116), response to xenobiotic stimulus (GO:0009410), GMP salvage (GO:0032263), IMP salvage (GO:0032264), hypoxanthine metabolic process (GO:0046100)	cytoplasm (GO:0005737)	GO:0005488	the ART proteome, established and putative Maurer's clefts proteins, genes whose expression is highly positively or negatively correlated with pfcrt or pfmdr1, drug targets, single gene/enzyme deletions predicted to cause impairment of metabolic networks, essential metabolic genes, S-glutathionylated proteins, highest expressed genes based on mRNA abundance, peptides with confirmed methylated lys…	hypoxanthine-guanine phosphoribosyltransferase	doi:10.1002/prot.22129 ; doi:10.1016/0378-1119(90)90163-l ; doi:10.1021/bi102039b ; doi:10.1021/acs.jcim.6b00203 ; doi:10.1093/nar/15.24.10469 ; doi:10.1021/pr300858g ; doi:10.1016/j.molbiopara.2004.05.014 ; doi:10.1021/acs.biochem.7b01027 ; doi:10.1016/j.ejmech.2019.111667
PF3D7_1371300	28S ribosomal RNA	-0.591079280338746	0.00866776343293283	13							doi:10.1261/rna.751807

## Sheet: Molecular Function-GO terms
GO Term	Study #	Study Freq.	Pop. Freq.	p-value	q-value	name	gene products
GO:0008201	6	0.25	0.68%	1.48E-9	8.11E-8	heparin binding	PF3D7_0402300,PF3D7_0731500,PF3D7_1301600,PF3D7_1335300,PF3D7_1335400,PF3D7_0102500
GO:0005488	23	0.96	0.64	2.7E-4	2.97E-3	binding	PF3D7_1342600,PF3D7_1017500,PF3D7_0402300,PF3D7_0731500,PF3D7_0707300,PF3D7_0302500,PF3D7_1301600,PF3D7_0501600,PF3D7_1410400,PF3D7_1003600,PF3D7_0302200,PF3D7_0613900,PF3D7_1035300,PF3D7_1370300,PF3D7_1251200,PF3D7_1335300,PF3D7_1239200,PF3D7_1335400,PF3D7_1310700,PF3D7_1012400,PF3D7_0102500,PF3D7_1035500,PF3D7_1014100
GO:0005253	2	8.3%	0.15%	3.15E-4	2.97E-3	monoatomic anion channel activity	PF3D7_0302200,PF3D7_0302500
GO:0046812	6	0.25	4.4%	4.36E-4	0.003	host cell surface binding	PF3D7_0402300,PF3D7_0731500,PF3D7_1301600,PF3D7_1335300,PF3D7_1335400,PF3D7_1035500

## Sheet: Biological Process-GO terms
GO Term	Study #	Study Freq.	Pop. Freq.	p-value	q-value	name	gene products
GO:0044409	11	0.5	7.4%	7.87E-8	9.05E-6	entry into host	PF3D7_0501600,PF3D7_1342600,PF3D7_0731500,PF3D7_1035900,PF3D7_0707300,PF3D7_1335300,PF3D7_1335400,PF3D7_1310700,PF3D7_0102500,PF3D7_1035500,PF3D7_1014100

## Sheet: Cellular Component-GO terms
GO Term	Study #	Study Freq.	Pop. Freq.	p-value	q-value	name	gene products
GO:0020008	7	0.18	1.3%	3.22E-7	1.87E-5	rhoptry	PF3D7_0501600,PF3D7_1410400,PF3D7_0402300,PF3D7_0302200,PF3D7_0707300,PF3D7_0302500,PF3D7_1335300
GO:1903561	9	0.24	2.9%	8.73E-7	2.53E-5	extracellular vesicle	PF3D7_0501600,PF3D7_0202500,PF3D7_1410400,PF3D7_0731500,PF3D7_1035300,PF3D7_0302500,PF3D7_1370300,PF3D7_0102500,PF3D7_1014100
GO:0016459	2	5.3%	0.1%	4.35E-4	4.2E-3	myosin complex	PF3D7_1342600,PF3D7_0613900
GO:0020039	2	5.3%	0.1%	4.35E-4	4.2E-3	pellicle	PF3D7_1342600,PF3D7_1251200
GO:0070258	5	0.13	2.0%	8.8E-4	6.38E-3	inner membrane pellicle complex	PF3D7_1342600,PF3D7_1017500,PF3D7_1003600,PF3D7_1310700,PF3D7_0525800
GO:0033643	15	0.39	0.18	1.67E-3	9.89E-3	host cell part	PF3D7_1102800,PF3D7_1016900,PF3D7_0707300,PF3D7_1001500,PF3D7_0302500,PF3D7_0202500,PF3D7_1410400,PF3D7_0302200,PF3D7_1035300,PF3D7_1370300,PF3D7_1035200,PF3D7_0831800,PF3D7_1038400,PF3D7_1149200,PF3D7_1014100
GO:0009986	6	0.16	4.6%	7.26E-3	0.0351	cell surface	PF3D7_1342600,PF3D7_1017500,PF3D7_1035900,PF3D7_1035300,PF3D7_1035500,PF3D7_1014100
GO:0020009	3	7.9%	1.2%	9.88E-3	0.0441	microneme	PF3D7_0731500,PF3D7_1301600,PF3D7_0102500
